# Supplementary material for: Regioselective addition of Grignard reagents to N-acylpyrazinium salts: synthesis of substituted 1,2-dihydropyrazines and Δ5-2-oxopiperazines
Source: publisher site journal article supplement (doi:10.3762/bjoc.15.8), 2019-01-08

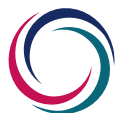

## Supporting Information

for

### **Regioselective addition of Grignard reagents to *N*-acylpyrazinium salts: synthesis of substituted 1,2- dihydropyrazines and $\Delta^5$ -2-oxopiperazines**

Valentine R. St. Hilaire, William E. Hopkins, Yenteeo S. Miller, Srinivasa R. Dandepally  
and Alfred L. Williams

*Beilstein J. Org. Chem.* **2019**, *15*, 72–78. doi:10.3762/bjoc.15.8

## Experimental section and NMR spectra

|                                                                                                                                                                                                   |             |
|---------------------------------------------------------------------------------------------------------------------------------------------------------------------------------------------------|-------------|
| <b>Table of Contents .....</b>                                                                                                                                                                    | <b>Page</b> |
| Experimental section.....                                                                                                                                                                         | S1          |
| Synthesis of mono- and disubstituted pyrazines .....                                                                                                                                              | S1          |
| General procedure for the Grignard addition to 3-substituted <i>N</i> -acylpyrazinium salts<br>to synthesize substituted 1,2-dihydropyrazines <b>3a–3j,4a,b,5,6,7a,b,8,9a,b,10,11,12,13</b> ..... | S4          |
| General procedure for the conversion of substituted 1,2-dihydropyrazines<br>to $\Delta^5$ -2-oxopiperazines using 1 M HCl <sub>(aq)</sub> /methanol .....                                         | S9          |
| General procedure for the conversion of substituted 1,2-dihydropyrazines<br>to $\Delta^5$ -2-oxopiperazines using 4 M HCl/dioxane .....                                                           | S10         |
| General procedure for the one-pot Grignard addition/hydrolysis reaction<br>to synthesize substituted $\Delta^5$ -2-oxopiperazines <b>15b–d</b> .....                                              | S11         |
| References .....                                                                                                                                                                                  | S12         |
| <sup>1</sup> H and <sup>13</sup> C NMR spectra.....                                                                                                                                               | S13         |

## Experimental section

All solvents and reagents were obtained from commercial sources and were used without further purification unless otherwise stated. Toluene and THF were dried using a solvent purification system. Anhydrous dichloromethane and all acylating agents were pretreated with K<sub>2</sub>CO<sub>3</sub> and 4 Å molecular sieves. All reactions were performed in oven-dried glassware (either in round-bottomed flasks or 25 mL vials fitted with rubber septa) under an atmosphere of nitrogen, and the reaction progress was monitored by thin-layer chromatography, GC–MS (EI) and/or LC–MS (ESI-APCI). Analytical thin-layer chromatography was performed on precoated 250 µm layer thickness silica gel 60 F254 plates and precoated 170–220 µm layer thickness neutral aluminum oxide Si 60 F254 plates. Visualization was done by ultraviolet light and/or by staining with phosphomolybdic acid (PMA). Purifications were carried out on flash silica gel columns (230–400 mesh) with EtOAc/hexanes mixtures as the eluent. The eluent was basified with 0.5–1.5% triethylamine for the purification of all Grignard adducts. Melting points were measured on a capillary melting point apparatus and are uncorrected. Proton nuclear magnetic resonance (<sup>1</sup>H NMR) spectra and carbon nuclear magnetic resonance (<sup>13</sup>C NMR) spectra were recorded on a 500 MHz spectrometer. Chemical shifts (δ) for protons are reported in parts per million (ppm) downfield from tetramethylsilane and are referenced to it (TMS, δ = 0.0 ppm). Coupling constants (*J*) are reported in hertz. Multiplicities are reported using the following abbreviations: br = broad; s = singlet; d = doublet; t = triplet; q = quartet; m = multiplet. Chemical shifts (δ) for carbon are reported in parts per million (ppm) downfield from tetramethylsilane and are referenced to residual solvent peaks (CDCl<sub>3</sub>, δ = 77.0 ppm). Rotameric ratios of all compounds were determined by <sup>1</sup>H NMR spectra. HRMS data was recorded on a LC-TOF.

**Synthesis of mono- and disubstituted pyrazines:** Compound **1a** was purchased from a commercial supplier. The known compound **1b** and unknown compound **1c** were prepared by

following the general procedure reported in the literature [1]. The known compounds **1d** [2], **1e** [2] and **1j** [2] are prepared by adopting the procedure reported by Yang and coworkers [3]. Compounds **1f** [4] and **1g** [5] were prepared as reported. The known compound **1h** was obtained by a slightly modified procedure [6].

**2-(4-Methoxybenzyloxy)pyrazine (1c).** To a suspension of NaH (0.645 g, 26.875 mmol) in anhydrous dimethoxyethane (30 mL) was slowly added dropwise 4-methoxybenzyl alcohol (3.34 mL, 26.907 mmol) at 0 °C over a period of 5 min and stirring continued for 15 min. Then, 2-chloropyrazine (2 mL, 22.405 mmol) was added at 0 °C and the mixture heated at 45 °C overnight. The reaction mixture was quenched with slow addition of water (10 mL) and extracted with EtOAc (100 mL), washed with brine, dried over Na<sub>2</sub>SO<sub>4</sub>, concentrated under reduced pressure and the resulted crude syrup was purified by flash silica gel column chromatography (Combiflash Rf) using EtOAc–hexanes (1:9) to obtain **1c** (4.650 g, 99%) as a white solid: mp: 69–71 °C; <sup>1</sup>H NMR (CDCl<sub>3</sub>, 500 MHz) δ 8.25 (s, 1H), 8.11 (d, 1H, *J* = 3.0 Hz), 8.08–8.10 (m, 1H), 7.39 (d, 2H, *J* = 8.5 Hz), 6.91 (d, 2H, *J* = 8.5 Hz), 5.32 (s, 2H), 3.81 (s, 3H); <sup>13</sup>C NMR (CDCl<sub>3</sub>, 125 MHz) δ 160.1, 159.6, 140.4, 136.6, 136.1, 130.0, 128.3, 113.9, 67.7, 55.2; HRMS (ESI) *m/z* calcd for C<sub>12</sub>H<sub>12</sub>N<sub>2</sub>O<sub>2</sub> [M+H]<sup>+</sup> 217.09772, found 217.09715.

**2-Methoxy-6-phenylpyrazine (1d).** Starting with 2,6-dichloropyrazine, intermediate 2-chloro-6-methoxypyrazine was prepared as a colorless crystalline solid in 86% yield by adopting the procedure as described above: mp: 26–27 °C; <sup>1</sup>H NMR (CDCl<sub>3</sub>, 300 MHz) δ 8.14 (s, 1H), 8.13 (s, 1 H), 3.99 (s, 3H). <sup>13</sup>C NMR (CDCl<sub>3</sub>, 125 MHz) δ 159.6, 145.5, 135.1, 133.1, 54.6; MS (ESI) *m/z* calcd for C<sub>5</sub>H<sub>6</sub>ClN<sub>2</sub>O [M+H]<sup>+</sup> 144.01, found 145.10. The compound **1d** was prepared from 2-chloro-6-methoxypyrazine, phenylboronic acid, Pd(OAc)<sub>2</sub> and K<sub>3</sub>PO<sub>4</sub>·H<sub>2</sub>O in 61% yield as a white solid: mp: 46–48 °C; <sup>1</sup>H NMR (CDCl<sub>3</sub>, 500 MHz) δ 8.60 (s, 1H), 8.16 (s, 1H), 8.04 (d, *J* = 7.5 Hz, 2H), 7.56–7.40 (m, 3H), 4.07 (s, 3H); <sup>13</sup>C NMR (CDCl<sub>3</sub>, 125MHz) δ 159.8, 148.9, 136.3, 133.7, 133.0, 129.7, 128.9, 126.8, 53.4; APCI/ESI-MS *m/z* calcd for C<sub>11</sub>H<sub>11</sub>N<sub>2</sub>O [M+H]<sup>+</sup> 186.08, found 187.10.

**2-Methoxy-6-(4-methoxyphenyl)pyrazine (1e).** The compound **1e** was prepared from 2-chloro-6-methoxypyrazine, 4-methoxyphenylboronic acid, Pd(OAc)<sub>2</sub> and K<sub>3</sub>PO<sub>4</sub>·H<sub>2</sub>O in 65% yield as a white solid: mp: 92–93 °C; <sup>1</sup>H NMR (CDCl<sub>3</sub>, 500 MHz) δ 8.54 (s, 1H), 8.10 (s, 1H), 7.99 (d, *J* = 8.0 Hz, 2H), 7.01 (d, *J* = 8.0 Hz, 2H), 4.05 (s, 3H), 3.87 (s, 3H); <sup>13</sup>C NMR (CDCl<sub>3</sub>, 125 MHz) δ 160.9, 159.6, 148.5, 132.5, 132.2, 128.7, 128.0, 114.2, 55.2, 53.2; HRMS (ESI) *m/z* calcd for C<sub>12</sub>H<sub>13</sub>N<sub>2</sub>O<sub>2</sub> [M+H]<sup>+</sup> 217.09715, found 217.09715.

**2-(Benzyloxy)-6-ethylpyrazine (1h).** To a suspension of NaH (0.081 g, 3.375 mmol) in anhydrous dimethoxyethane (10 mL) was slowly added dropwise benzyl alcohol (0.35 mL, 3.379 mmol) at 0 °C and stirring continued for 15 min. Then, 2,6-dichloropyrazine (0.500 g, 3.356 mmol) was added at 0 °C and the mixture heated at 45 °C for 8 h. The reaction mixture was quenched with slow addition of water (5 mL) and extracted with EtOAc (50 mL), washed with brine, dried over Na<sub>2</sub>SO<sub>4</sub>, concentrated under reduced pressure and the resulted crude syrup was purified by flash silica gel column chromatography (Combiflash Rf) using EtOAc–hexanes (1:19) to obtain 2-(benzyloxy)-6-chloropyrazine (0.560 g, 76%) as a colorless liquid: <sup>1</sup>H NMR (CDCl<sub>3</sub>, 500 MHz) δ 8.17 (d, *J* = 5.0 Hz, 1H), 7.48–7.45 (m, 2H), 7.42–7.34 (m, 3H), 5.39 (s, 2H); <sup>13</sup>C NMR (CDCl<sub>3</sub>, 125 MHz) δ 159.0, 145.3, 142.4, 135.5, 135.4, 133.3, 128.6, 128.4, 68.8; HRMS (ESI)

$m/z$  calcd for  $C_{11}H_{10}ClN_2O$   $[M+H]^+$  221.0476, found 221.0484. Next, to a solution of 2-(benzyloxy)-6-chloropyrazine (1.000 g, 4.532 mmol) in anhydrous toluene (20 mL) were added first 1,3-bis(diphenylphosphino)propane nickel(II) chloride (0.050 g, 0.092 mmol) and then diethyl zinc (1.5 M in toluene, 3.4 mL, 5.510 mmol) at 0 °C slowly (dropwise), and stirred at room temperature for 2 h. The reaction mixture was quenched with aq.  $NH_4OH$  solution (5 mL), extracted with EtOAc (50 mL), washed with brine, dried over  $Na_2SO_4$  and concentrated under reduced pressure. The resulting crude material was purified by flash silica gel column chromatography (Combiflash Rf, 0–10% EtOAc/hexanes) to obtain **1h** (0.920 g, 95%) as a colorless liquid:  $^1H$  NMR ( $CDCl_3$ , 500 MHz)  $\delta$  8.08 (s, 1H), 8.00 (s, 1H), 7.48–7.45 (m, 2H), 7.39–7.35 (m, 2H), 7.34–7.30 (m, 1H), 5.40 (s, 2H), 2.74 (q, 2H,  $J = 7.5$  Hz), 1.30 (dt, 3H,  $J = 1.0, 7.5$  Hz);  $^{13}C$  NMR ( $CDCl_3$ , 125 MHz)  $\delta$  159.3, 155.0, 136.7, 135.0, 132.6, 128.4, 128.0, 128.2, 67.5, 28.0, 13.1; HRMS (ESI)  $m/z$  calcd for  $C_{13}H_{15}N_2O$   $[M+H]^+$  215.11789, found 215.11782.

**2-Benzyl-6-benzyloxypyrazine (1i).** To a solution of 2-(benzyloxy)-6-chloropyrazine (0.200 g, 0.906 mmol) in anhydrous THF (4 mL) were added first 1,3-bis(diphenylphosphino)propane nickel(II) chloride (0.010 g, 0.018 mmol) and then benzylmagnesium chloride solution (2M in THF, 0.5 mL, 0.994 mmol) at 0 °C slowly (dropwise), and stirred at room temperature for 2 h. The reaction mixture was quenched with aq.  $NH_4Cl$  solution (4 mL), extracted with EtOAc (20 mL), washed with brine, dried over  $Na_2SO_4$  and concentrated under reduced pressure. The resulted crude material was purified by flash silica gel column chromatography (Combiflash Rf, 0–10% EtOAc/hexanes) to afford **1i** (0.130 g, 52%) as a colorless syrup:  $^1H$  NMR ( $CDCl_3$ , 500 MHz)  $\delta$  8.09 (s, 1H), 8.01 (s, 1H), 7.42–7.39 (m, 2H), 7.37–7.22 (m, 8H), 5.37 (s, 2H), 4.04 (s, 2H);  $^{13}C$  NMR ( $CDCl_3$ , 125 MHz)  $\delta$  159.3, 152.4, 138.4 (2), 136.6, 135.6, 133.1, 129.2, 129.1, 128.6, 128.5, 128.3, 128.0, 126.6, 67.7, 41.4; HRMS (ESI)  $m/z$  calcd for  $C_{18}H_{17}N_2O$   $[M+H]^+$  277.13354, found 277.13347.

**2-Benzyl-6-phenylpyrazine (1j).** To a solution of 2-(benzyloxy)-6-chloropyrazine (0.600 g, 2.719 mmol) in 2-propanol (5 mL) were added phenylboronic acid (0.500 g, 4.101 mmol),  $Pd(OAc)_2$  (0.030 g, 0.134 mmol, 5 mol %),  $K_3PO_4 \cdot H_2O$  (1.200 g, 5.211 mmol) and water (5 mL), and the mixture heated at 80 °C for 12 h. The reaction mixture was diluted with EtOAc (30 mL), washed with brine, dried over  $Na_2SO_4$ , concentrated under reduced pressure and the resulted crude syrup was purified by flash silica gel column chromatography (Combiflash Rf, 0–10% EtOAc/hexanes) to afford **1j** (0.700 g, 98%) as a white solid: mp: 58–60 °C;  $^1H$  NMR ( $CDCl_3$ , 500 MHz)  $\delta$  8.61 (s, 1H), 8.21 (s, 1H), 8.02 (d,  $J = 8.0$  Hz, 2H), 7.52–7.43 (m, 5H), 7.40 (t,  $J = 7.0$  Hz, 2H), 7.36–7.32 (m, 1H), 5.51 (s, 2H);  $^{13}C$  NMR ( $CDCl_3$ , 125 MHz)  $\delta$  159.2, 148.8, 136.6, 136.2, 133.8, 133.3, 129.7, 128.9, 128.5, 128.2, 128.1, 126.8, 67.8; HRMS (ESI)  $m/z$  calcd for  $C_{17}H_{15}N_2O$   $[M+H]^+$  263.1179, found 263.1180.

**Benzyl 6-(benzyloxy)pyrazine-2-carboxylate (1k).** A stirred mixture of benzyl 4-hydroxypyrazine-2-carboxylate (2.000 g, 8.69 mmol) in 10 mL of thionyl chloride was heated at 80 °C for 10 h. The volatiles were removed under reduced pressure, then the residue was

quenched with saturated  $\text{NaHCO}_3$ , extracted with  $\text{CH}_2\text{Cl}_2$  ( $3 \times 30$  mL), dried over  $\text{Na}_2\text{SO}_4$ , concentrated under reduced pressure and then purified by flash silica gel column chromatography (Combiflash Rf, 0–10% EtOAc/hexanes) to afford benzyl 6-chloropyrazine-2-carboxylate (1.700 g, 79%) as a white solid: mp: 64–65 °C;  $^1\text{H}$  NMR ( $\text{CDCl}_3$ , 500 MHz)  $\delta$  9.19 (s, 1H), 8.76 (s, 1H), 7.52–7.45 (m, 2H), 7.44–7.33 (m, 3H), 5.47 (s, 2H);  $^{13}\text{C}$  NMR ( $\text{CDCl}_3$ , 125 MHz)  $\delta$  162.4, 149.1, 147.9, 143.5, 142.5, 134.7, 128.6, 128.5(2), 67.9; HRMS (ESI)  $m/z$  calcd for  $\text{C}_{12}\text{H}_9\text{ClNaN}_2\text{O}_2$   $[\text{M}+\text{Na}]^+$  271.02448, found 271.02494. Next, to a suspension of sodium hydride (0.106 g, 2.65 mmol) in anhydrous dimethoxyethane (5 mL) was slowly added (dropwise) benzyl alcohol (0.274 mL 2.65 mmol) at 0 °C and stirring continued for 15 min. Then, benzyl 6-chloropyrazine-2-carboxylate (0.500 g, 2.01 mmol) was added at 0 °C and the mixture was heated at 45 °C for 12 h. The volatiles were removed under reduced pressure and the residue purified by flash silica gel column chromatography (Combiflash Rf, 0–50% EtOAc/hexanes) to afford **1k** (0.354 g, 55%) as clear colorless syrup:  $^1\text{H}$  NMR ( $\text{CDCl}_3$ , 500 MHz)  $\delta$  8.86 (s, 1H), 8.41 (s, 1H), 7.54–7.45 (m, 4H), 7.45–7.28 (m, 6H), 5.47 (s, 2H), 5.44 (s, 2H);  $^{13}\text{C}$  NMR ( $\text{CDCl}_3$ , 125 MHz)  $\delta$  164.0, 159.3, 139.8, 139.4, 138.2, 135.8, 135.4, 128.8, 128.7, 128.6, 128.4, 68.6, 67.5; HRMS (ESI)  $m/z$  calcd for  $\text{C}_{19}\text{H}_{17}\text{N}_2\text{O}_3$   $[\text{M}+\text{H}]^+$  321.12337, found 321.12332.

**General procedure for the Grignard addition to 3-substituted *N*-acylpyrazinium salts to synthesize substituted 1,2-dihydropyrazines 3a–3j, 4a,b, 5, 6, 7a,b, 8, 9a,b, 10, 11, 12, 13.** Representative procedure for the preparation of 1-phenoxy carbonyl-2-phenyl-3-methoxy-1,2-dihydropyrazine (**3a**). To a stirred solution of 2-methoxypyrazine (0.200 g, 1.816 mmol) in anhydrous THF (5 mL) was added phenylchloroformate (0.28 mL, 2.225 mmol) at 0 °C and stirring was continued under nitrogen atmosphere until salt formation was completed (15 min, as determined by TLC on neutral alumina, EtOAc/hexanes 1:19). The reaction mixture was cooled to –41 °C, a 1 M solution of phenylmagnesium bromide in THF (2.4 mL, 2.4 mmol) was added and the mixture stirred until reaction completion (40 min, as determined by TLC on neutral  $\text{SiO}_2$ , EtOAc/hexanes 1:9), and then quenched with 2 mL of aqueous 20%  $\text{NH}_4\text{OH}/\text{NH}_4\text{Cl}$  1:1 (w/w). The mixture was extracted with dichloromethane ( $2 \times 15$  mL), dried over  $\text{Na}_2\text{SO}_4$ , and concentrated in vacuo. Purification of the crude mixture by flash silica gel column chromatography (0–15% EtOAc/hexanes) afforded **3a** (0.488 g, 87%) as a white solid (3:2 mixture of rotamers): mp: 81–82 °C;  $^1\text{H}$  NMR ( $\text{CDCl}_3$ , 500 MHz)  $\delta$  7.49–7.27 (m, 7H), 7.20 (t,  $J$  = 7.5 Hz, 1H), 7.12 (d,  $J$  = 8.0 Hz, 1H), 6.99 (d,  $J$  = 7.5 Hz, 1H), 6.67 and 6.63 (2d due to rotamers,  $J$  = 5.5 Hz, 1H), 6.16 and 6.14 (2d due to rotamers,  $J$  = 5.0 Hz, 1H), 5.89 and 5.87 (2s due to rotamers, 1H), 3.84 and 3.83 (2s due to rotamers, 3H);  $^{13}\text{C}$  NMR ( $\text{CDCl}_3$ , 125 MHz)  $\delta$  160.2, 160.0, 151.6, 151.5, 150.7, 150.4, 136.8, 135.9, 129.3, 128.8, 128.7, 128.6, 127.2, 126.6, 125.9, 125.8, 121.3, 118.2, 118.1, 112.5, 111.8, 56.0, 54.6, 54.0, 53.9; HRMS (ESI)  $m/z$  calcd for  $\text{C}_{18}\text{H}_{17}\text{N}_2\text{O}_3$   $[\text{M} + \text{H}]^+$  309.12337, found 309.123554.

**1-Phenoxy carbonyl-2-methyl-3-methoxy-1,2-dihydropyrazine (3b).** Compound **3b** was prepared in 67% yield as a yellowish syrup (3:2 mixture of rotamers):  $^1\text{H}$  NMR ( $\text{CDCl}_3$ , 500 MHz)  $\delta$  7.43–7.34 (m, 2H), 7.28–7.19 (m, 1H), 7.14 (dd,  $J$  = 1.0, 8.5 Hz, 2H), 6.50 and 6.46 (2d due to rotamers,  $J$  = 5.5 Hz, 1H), 6.13 and 6.07 (2d due to rotamers,  $J$  = 5.5 Hz, 1H), 4.91 and 4.86 (2m due to rotamers, 1H), 3.83 and 3.82 (2s due to rotamers, 3H), 1.35 and 1.28 (2d due to rotamers,

$J = 7.0$  Hz, 3H);  $^{13}\text{C}$  NMR ( $\text{CDCl}_3$ , 125 MHz)  $\delta$  162.3, 161.9, 151.2, 150.9, 150.7, 150.5, 129.4, 129.3 (2), 125.8, 125.7, 121.4, 121.3, 121.1, 118.4, 118.1, 111.1, 110.7, 53.7, 53.6, 48.6, 47.7, 15.5, 14.6; HRMS (ESI)  $m/z$  calcd for  $\text{C}_{13}\text{H}_{15}\text{N}_2\text{O}_3$   $[\text{M} + \text{H}]^+$  247.10772, found 247.10770.

*1-Phenoxycarbonyl-2-ethyl-3-methoxy-1,2-dihydropyrazine (3c)*. Compound **3c** was prepared in 73% yield as a white solid (3:2 mixture of rotamers): mp: 80–82 °C;  $^1\text{H}$  NMR ( $\text{CDCl}_3$ , 500 MHz)  $\delta$  7.45–7.33 (m, 2H), 7.28–7.19 (m, 1H), 7.14 (d,  $J = 8.0$  Hz, 2H), 6.53 and 6.49 (2d due to rotamers,  $J = 5.0$  Hz, 1H), 6.13. and 6.07 (2d due to rotamers,  $J = 5.5$  Hz, 1H), 4.81 and 4.76 (2t due to rotamers,  $J = 7.0$  Hz, 1H), 3.83 and 3.82 (2s due to rotamers, 3H), 1.81–1.61 (m, 2H), 1.01 and 0.96 (2t due to rotamers,  $J = 7.0$  Hz, 1H);  $^{13}\text{C}$  NMR ( $\text{CDCl}_3$ , 125 MHz)  $\delta$  161.9, 161.4, 151.8, 151.7, 150.9, 150.6, 129.5, 129.4, 125.9, 125.8, 121.5, 121.4, 119.2, 118.7, 111.9, 111.4, 54.0, 53.7, 53.6, 53.0, 23.7, 23.3, 9.7; HRMS (ESI)  $m/z$  calcd for  $\text{C}_{14}\text{H}_{16}\text{N}_2\text{O}_3$   $[\text{M} + \text{Na}]^+$  283.10531, found 283.10509.

*1-Phenoxycarbonyl-2-isopropyl-3-methoxy-1,2-dihydropyrazine (3d)*. Compound **3d** was prepared in 48% yield as an off-white solid (3:2 mixture of rotamers): mp: 45–47 °C;  $^1\text{H}$  NMR ( $\text{CDCl}_3$ , 500 MHz)  $\delta$  7.43–7.35 (m, 2H), 7.30–7.18 (m, 1H), 7.16–7.10 (m, 2H), 6.55 and 6.52 (2dd due to rotamers,  $J = 1.5, 5.0$  Hz, 1H), 6.17 and 6.09 (2d due to rotamers,  $J = 5.0$  Hz, 1H), 3.84 and 3.82 (2s due to rotamers, 3H), 2.15–2.00 (m, 1H), 1.05–0.99 (m, 1H), 0.97 (t,  $J = 7.0$  Hz, 6H);  $^{13}\text{C}$  NMR ( $\text{CDCl}_3$ , 125 MHz)  $\delta$  161.1, 160.6, 152.2, 152.1, 151.0, 150.9, 150.6, 129.6, 129.5, 129.4, 126.3, 125.9, 125.8, 121.5, 121.4, 120.9, 120.0, 119.5, 112.2, 111.8, 58.2, 57.1, 53.6, 53.5, 30.0, 29.9, 19.4, 19.3, 18.6; HRMS (ESI)  $m/z$  calcd for  $\text{C}_{15}\text{H}_{19}\text{N}_2\text{O}_3$   $[\text{M} + \text{H}]^+$  275.13902, found 275.13901.

*1-Phenoxycarbonyl-2-cyclopentyl-3-methoxy-1,2-dihydropyrazine (3e)*. Compound **3e** was prepared in 65% yield as a white solid (3:2 mixture of rotamers): mp: 78–80 °C;  $^1\text{H}$  NMR ( $\text{CDCl}_3$ , 500 MHz)  $\delta$  7.45–7.34 (m, 2H), 7.30–7.19 (m, 1H), 7.13 (d,  $J = 8.5$  Hz, 2H), 6.53 and 6.50 (2d due to rotamers,  $J = 5.0$  Hz, 1H), 6.19 and 6.12 (2d due to rotamers,  $J = 5.0$  Hz, 1H), 4.70 and 4.67 (2dd due to rotamers,  $J = 1.5, 9.0$  Hz, 1H), 3.84 and 3.83 (2s due to rotamers, 3H), 2.37–2.19 (m, 1H), 1.82–1.60 (m, 4H), 1.60–1.41 (m, 4H);  $^{13}\text{C}$  NMR ( $\text{CDCl}_3$ , 125 MHz)  $\delta$  161.7, 161.2, 152.1, 152.0, 151.0, 150.9, 150.6, 129.6, 129.5, 129.4, 126.3, 125.9, 125.7, 121.5, 121.4, 120.9, 120.0, 119.5, 112.0, 111.5, 56.2, 55.0, 53.7, 53.6, 40.9, 40.8, 29.6, 29.5, 28.6 (2), 24.9, 24.7, 24.3, 24.2; HRMS (ESI)  $m/z$  calcd for  $\text{C}_{17}\text{H}_{21}\text{N}_2\text{O}_3$   $[\text{M} + \text{H}]^+$  301.15467, found 301.15502.

*1-Phenoxycarbonyl-2-benzyl-3-methoxy-1,2-dihydropyrazine (3f)*. Compound **3f** was prepared in 54% yield as a colorless syrup (1:1 mixture of rotamers):  $^1\text{H}$  NMR ( $\text{CDCl}_3$ , 500 MHz)  $\delta$  7.41–7.08 (m, 8H), 6.96 (d,  $J = 7.5$  Hz, 1H), 6.58 (d,  $J = 7.5$  Hz, 1H), 6.55 and 6.22 (2d due to rotamers,  $J = 5.5$  Hz, 1H), 6.49 and 6.04 (2d due to rotamers,  $J = 5.5$  Hz, 1H), 5.11–4.99 (m, 1H), 3.82 and 3.74 (2s due to rotamers, 3H), 3.02–2.80 (m, 2H);  $^{13}\text{C}$  NMR ( $\text{CDCl}_3$ , 125 MHz)  $\delta$  161.0, 160.8, 151.5, 151.2, 150.7, 150.1, 135.8, 135.7, 129.5, 129.2, 129.0, 128.5, 128.2, 126.9, 126.7, 125.6, 121.3, 121.2, 119.6, 118.6, 111.3, 111.1, 53.9, 53.8, 53.5, 52.8, 35.3, 35.1; HRMS (ESI)  $m/z$  calcd for  $\text{C}_{19}\text{H}_{19}\text{N}_2\text{O}_3$   $[\text{M} + \text{H}]^+$  323.13902, found 323.13932.

*1-Phenoxycarbonyl-2-(2-bromobenzyl)-3-methoxy-1,2-dihydropyrazine (3g)*. Compound **3g** was prepared in 49% yield as a white solid (1:1 mixture of rotamers): mp: 124–126 °C;  $^1\text{H}$  NMR

(CDCl<sub>3</sub>, 500 MHz)  $\delta$  7.52 (t,  $J$  = 9.0 Hz, 1H), 7.30 (t,  $J$  = 8.0 Hz, 1H), 7.21–7.08 (m, 3H), 6.80 (d,  $J$  = 8.0 Hz, 1H), 6.67 (d,  $J$  = 8.0 Hz, 1H), 6.55 (t,  $J$  = 4.0 Hz, 1H), 6.26 and 6.09 (2d due to rotamers,  $J$  = 5.5 Hz, 1H), 5.34–5.27 (m) and 5.21 (t,  $J$  = 6.5 Hz), (total 1H), 3.82 and 3.77 (2s due to rotamers, 3H), 3.21 and 3.18 (2d,  $J$  = 5.5 Hz, 1H), 3.14 and 3.11 (2d,  $J$  = 5.0 Hz, 1H), 3.07–2.96 (m, 2H); <sup>13</sup>C NMR (CDCl<sub>3</sub>, 125 MHz)  $\delta$  160.7, 160.6, 151.4, 151.3, 150.7, 150.2, 135.5, 135.3, 132.9, 131.9, 131.6, 129.3, 129.1, 128.8, 128.6, 127.6, 127.2, 125.8, 125.6, 125.3, 125.2, 121.4, 121.1, 119.7, 118.7, 111.5, 111.3, 53.9, 53.8, 51.8, 51.3, 35.2, 35.1; HRMS (ESI)  $m/z$  calcd for C<sub>19</sub>H<sub>18</sub>BrN<sub>2</sub>O<sub>3</sub> [M + H]<sup>+</sup> 401.04953, found 401.05022.

*1-Phenoxycarbonyl-2-(4-chlorophenyl)-3-methoxy-1,2-dihydropyrazine (3h)*. Compound **3h** was prepared in 62% yield as a colorless syrup (3:2 mixture of rotamers): <sup>1</sup>H NMR (CDCl<sub>3</sub>, 500 MHz)  $\delta$  7.46–7.28 (m, 6H), 7.28–7.18 (m, 1H), 7.12 (d,  $J$  = 8.5 Hz, 1H), 7.00 (d,  $J$  = 8.5 Hz, 1H), 6.67 and 6.63 (2d due to rotamers,  $J$  = 5.5 Hz, 1H), 6.16 and 6.14 (2d due to rotamers,  $J$  = 5.5 Hz, 1H), 5.84 (s, 1H), 3.85 and 3.84 (2s due to rotamers, 3H); <sup>13</sup>C NMR (CDCl<sub>3</sub>, 125 MHz)  $\delta$  159.8, 159.7, 151.6, 151.5, 150.7, 150.4, 135.5, 134.7, 134.6, 129.5, 129.1, 129.0, 128.8, 128.2, 126.1, 126.0, 121.4, 118.2, 118.1, 112.5, 111.8, 55.5, 54.2, 54.1; HRMS (ESI)  $m/z$  calcd for C<sub>18</sub>H<sub>16</sub>ClN<sub>2</sub>O<sub>3</sub> [M + H]<sup>+</sup> 343.08440, found 343.08453.

*1-Phenoxycarbonyl-2-(4-methoxyphenyl)-3-methoxy-1,2-dihydropyrazine (3i)*. Compound **3i** was prepared in 74% yield as a white solid (3:2 mixture of rotamers): mp: 102–104 °C; <sup>1</sup>H NMR (CDCl<sub>3</sub>, 500 MHz)  $\delta$  7.40–7.29 (m, 4H), 7.22 (t,  $J$  = 7.5 Hz, 1H), 7.12 (d,  $J$  = 8.5 Hz, 1H), 7.03 (d,  $J$  = 8.0 Hz, 1H), 6.87 (t,  $J$  = 10.5 Hz, 2H), 6.64 and 6.61 (2d due to rotamers,  $J$  = 5.5 Hz, 1H), 6.17 and 6.14 (2d due to rotamers,  $J$  = 5.5 Hz, 1H), 5.83 and 5.82 (2s due to rotamers, 1H), 3.85 and 3.84 (2s due to rotamers, 3H), 3.81 and 3.79 (2s due to rotamers, 3H); <sup>13</sup>C NMR (CDCl<sub>3</sub>, 125 MHz)  $\delta$  160.6, 160.5, 159.9, 151.7, 151.6, 150.8, 150.6, 129.5, 129.4, 129.1, 128.8, 128.3, 128.2, 126.0, 125.9, 121.5, 118.3, 118.2, 114.2, 112.5, 111.8, 55.5, 55.3, 54.2, 54.1, 54.0; HRMS (ESI)  $m/z$  calcd for C<sub>19</sub>H<sub>19</sub>N<sub>2</sub>O<sub>4</sub> [M + H]<sup>+</sup> 339.13393, found 339.13412.

*1-Phenoxycarbonyl-2-(2,4-dimethylphenyl)-3-methoxy-1,2-dihydropyrazine (3j)*. Compound **3j** was prepared in 76% yield as a colorless syrup (3:2 mixture of rotamers): <sup>1</sup>H NMR (CDCl<sub>3</sub>, 500 MHz)  $\delta$  7.44 and 7.37 (2d due to rotamers, 1H), 7.34–7.21 (m, 2H), 7.21–6.91 (m, 4H), 6.84–6.72 (m), 6.56 (br s) and 6.32 (br s), (total 2H), 6.10 (dd,  $J$  = 1.0, 5.5 Hz, 1H), 5.99–5.92 (m, 1H), 3.76–3.69 (m, 3H), 2.52 (s), 2.46–2.41 (m) and 2.31–2.25 (m) (total 6H); <sup>13</sup>C NMR (CDCl<sub>3</sub>, 125 MHz)  $\delta$  161.7, 161.4, 151.4, 151.3, 150.6, 150.3, 138.2, 138.0, 135.9, 135.6, 134.9, 134.3, 131.1, 130.8, 129.2, 129.1, 129.0, 127.6 (2), 127.2, 126.4, 126.3, 125.6 (2), 121.4, 121.1, 117.1, 116.6, 113.7, 113.2, 112.6, 53.7, 52.5, 51.5, 20.9, 20.2, 19.3, 19.2; HRMS (ESI)  $m/z$  calcd for C<sub>20</sub>H<sub>21</sub>N<sub>2</sub>O<sub>3</sub> [M + H]<sup>+</sup> 337.15467, found 337.15505.

*1-Phenoxycarbonyl-2-methyl-3-benzyloxy-1,2-dihydropyrazine (4a)*. Compound **4a** was prepared in 68% yield as a white solid (3:2 mixture of rotamers): mp: 60–62 °C; <sup>1</sup>H NMR (CDCl<sub>3</sub>, 500 MHz)  $\delta$  7.45–7.32 (m, 7H), 7.29–7.21 (m, 1H), 7.17–7.11 (m, 2H), 6.53 and 6.48 (2d due to rotamers,  $J$  = 5.5 Hz, 1H), 6.15 and 6.09 (2d due to rotamers,  $J$  = 5.5 Hz, 1H), 5.24 and 5.23 (2s due to rotamers, 2H), 4.98 and 4.92 (2q due to rotamers,  $J$  = 7.0 Hz, 1H), 1.38 and 1.31 (2d due to rotamers,  $J$  = 7.0 Hz, 3H); <sup>13</sup>C NMR (CDCl<sub>3</sub>, 125 MHz)  $\delta$  161.6, 161.2, 151.3, 151.0, 150.7, 150.5, 136.0, 135.9, 129.4 (2), 128.5 (2), 128.2 (2), 128.1, 128.0, 125.8 (2), 121.5, 121.4, 118.4,

118.1, 111.4, 110.9, 68.3, 68.1, 48.8, 47.9, 15.6, 14.7; HRMS (ESI)  $m/z$  calcd for  $C_{19}H_{19}N_2O_3$   $[M + H]^+$  323.13902, found 323.13861.

*1-Phenoxycarbonyl-2-phenyl-3-benzyloxy-1,2-dihydropyrazine (4b)*. Compound **4b** was prepared in 88% yield as a white solid (3:2 mixture of rotamers): mp: 95–96 °C;  $^1H$  NMR ( $CDCl_3$ , 500 MHz)  $\delta$  7.46–7.26 (m, 12H), 7.26–7.18 (m, 1H), 7.17–7.10 (m, 1H), 6.99 (d,  $J$  = 8.0 Hz, 1H), 6.70 and 6.65 (2d due to rotamers,  $J$  = 5.5 Hz, 1H), 6.18 and 6.15 (2d due to rotamers,  $J$  = 5.5 Hz, 1H), 5.95 and 5.94 (2s due to rotamers, 1H), 5.38–5.18 (m, 2H);  $^{13}C$  NMR ( $CDCl_3$ , 125 MHz)  $\delta$  159.4, 159.3, 151.8, 151.7, 150.8, 150.5, 136.9, 136.0, 135.9, 129.4, 128.9 (2), 128.7, 128.5 (2), 128.2 (2), 128.1, 128.0, 127.3, 126.7, 126.0, 125.9, 121.5 (2), 118.4, 118.2, 112.8, 112.1, 68.6, 68.4, 56.1, 54.8; HRMS (ESI)  $m/z$  calcd for  $C_{24}H_{21}N_2O_3$   $[M + H]^+$  385.15467, found 385.15394.

*1-Phenoxycarbonyl-2-phenyl-3-(4-methoxybenzyloxy)-1,2-dihydropyrazine (5)*. Compound **5** was prepared in 68% yield as a white solid (3:2 mixture of rotamers): mp: 90–91 °C;  $^1H$  NMR ( $CDCl_3$ , 500 MHz)  $\delta$  7.44–7.29 (m, 7H), 7.29–7.17 (m, 3H), 7.13 (d,  $J$  = 8.5 Hz, 1H), 6.90–6.82 (m, 2H), 6.69 and 6.63 (2d due to rotamers,  $J$  = 5.5 Hz, 1H), 6.18 and 6.15 (2d due to rotamers,  $J$  = 5.5 Hz, 1H), 5.92 and 5.91 (2s due to rotamers, 1H), 5.30–5.11 (m, 2H), 3.79 (2s due to rotamers, 3H);  $^{13}C$  NMR ( $CDCl_3$ , 125 MHz)  $\delta$  159.6, 159.5, 159.4, 159.3, 151.7, 151.6, 150.7, 150.4, 136.7, 135.9, 129.9, 129.8, 129.3 (2), 128.7 (2), 128.6 (2), 127.9 (2), 127.2, 126.6, 125.9, 125.8, 121.4 (2), 118.4, 118.2, 113.8 (2), 112.6, 111.9, 68.3, 68.2, 56.0, 55.2, 54.7; HRMS (ESI)  $m/z$  calcd for  $C_{25}H_{23}N_2O_4$   $[M + H]^+$  415.16523, found 415.16468.

*1-Phenoxycarbonyl-2,5-diphenyl-3-methoxy-1,2-dihydropyrazine (6)*. Compound **6** was prepared in 93% yield as a yellow solid (3:2 mixture of rotamers): mp: 118–120 °C;  $^1H$  NMR ( $CDCl_3$ , 500 MHz)  $\delta$  7.85–7.76 (m, 2H), 7.46–7.27 (m, 9H), 7.27–7.19 (m, 2H), 7.19–7.11 (m, 2H), 7.03 (d,  $J$  = 7.5 Hz, 1H), 5.95 and 5.93 (2s due to rotamers, 1H), 3.99 and 3.98 (2s due to rotamers, 3H);  $^{13}C$  NMR ( $CDCl_3$ , 125 MHz)  $\delta$  159.4, 151.8, 150.7, 150.5, 136.7, 136.4, 136.3, 135.8, 129.3 (2), 128.8 (2), 128.6, 128.4, 128.3, 127.3 (2), 127.2, 126.7, 125.9, 125.8, 124.5, 124.4, 121.4, 121.3, 108.1, 107.3, 55.5, 54.3, 54.0, 53.9; HRMS (ESI)  $m/z$  calcd for  $C_{24}H_{21}N_2O_3$   $[M + H]^+$  385.15467, found 385.15462.

*1-Phenoxycarbonyl-2-phenyl-3-methoxy-5-(4-methoxyphenyl)-1,2-dihydropyrazine (7a)*. Compound **7a** was prepared in 78% yield as a yellow solid (3:2 mixture of rotamers): mp: 48–50 °C;  $^1H$  NMR ( $CDCl_3$ , 500 MHz)  $\delta$  7.80–7.69 (m, 2H), 7.42–7.28 (m, 8H), 7.26–7.20 (m, 1H), 7.18–7.11 (m, 1H), 7.05 and 7.03 (2s due to rotamers, 1H), 6.96–6.89 (m, 2H), 5.94 and 5.92 (2s due to rotamers, 1H), 3.98 and 3.97 (2s due to rotamers, 3H), 3.83 (2s due to rotamers, 3H);  $^{13}C$  NMR ( $CDCl_3$ , 125 MHz)  $\delta$  159.6, 159.5, 159.3, 159.2, 152.0, 151.9, 150.9, 150.7, 136.8, 135.9, 129.5, 129.4, 129.2, 128.9 (2), 128.7(3), 128.4, 127.5, 126.9, 126.0, 125.9 (2), 125.8, 121.6, 121.5, 114.0, 113.9, 106.6, 105.9, 55.6, 55.4, 54.4, 54.2, 54.0; HRMS (ESI)  $m/z$  calcd for  $C_{25}H_{23}N_2O_4$   $[M+H]^+$  415.16523, found 415.16442.

*1-Phenoxycarbonyl-2-methyl-3-methoxy-5-(4-methoxyphenyl)-1,2-dihydropyrazine (7b)*. Compound **7b** was prepared in 88% yield as a colorless syrup (3:2 mixture of rotamers):  $^1H$  NMR ( $CDCl_3$ , 500 MHz)  $\delta$  7.77–7.68 (m, 2H), 7.44–7.36 (m, 2H), 7.29–7.21 (m, 1H), 7.21–7.15 (m, 2H), 6.96–6.89 (m, 3H), 4.96 and 4.91 (2q due to rotamers,  $J$  = 6.5 Hz,  $J$  = 7.0



Hz, 1H), 3.96 and 3.95 (2s due to rotamers, 3H), 3.83 and 3.82 (2s due to rotamers, 3H), 1.37 and 1.30 (2d due to rotamers,  $J = 6.5$  Hz, 3H);  $^{13}\text{C}$  NMR ( $\text{CDCl}_3$ , 125 MHz)  $\delta$  161.7, 161.4, 159.2, 159.1, 151.6, 151.4, 150.9, 150.7, 129.5, 129.4, 129.3 (2), 128.5, 128.3, 125.9, 125.8, 125.7 (2), 121.5, 121.4, 113.9, 113.8, 105.4, 104.9, 55.3, 53.8, 53.7, 48.3, 47.4, 16.1, 15.2; HRMS (ESI)  $m/z$  calcd for  $\text{C}_{20}\text{H}_{21}\text{N}_2\text{O}_4$   $[\text{M}+\text{H}]^+$  353.14958, found 353.14900.

*1-Phenoxycarbonyl-2-phenyl-3,5-dimethoxy-1,2-dihydropyrazine (8)*. Compound **8** was prepared in 45% yield as a colorless syrup (3:2 mixture of rotamers):  $^1\text{H}$  NMR ( $\text{CDCl}_3$ , 500 MHz)  $\delta$  7.43–7.30 (m, 6H), 7.27–7.18 (m, 1H), 7.14 (d,  $J = 7.5$  Hz, 1H), 7.04 (d,  $J = 7.5$  Hz, 1H), 5.98 and 5.89 (2s due to rotamers 1H), 5.93 and 5.92 (2s due to rotamers 1H), 6.01–5.87 (m, 2H), 3.91 (2s due to rotamers, 3H), 3.69 (2s due to rotamers, 3H);  $^{13}\text{C}$  NMR ( $\text{CDCl}_3$ , 125 MHz)  $\delta$  161.6, 161.4, 152.2, 151.5, 150.8, 150.6, 148.0, 147.8, 135.7, 135.0, 129.3 (2), 128.8, 128.7 (3), 127.1, 126.6, 125.7 (2), 121.5, 121.4, 87.5, 87.1, 55.6, 55.1 (2), 54.6, 54.5, 54.4; HRMS (ESI)  $m/z$  calcd for  $\text{C}_{19}\text{H}_{18}\text{NaN}_2\text{O}_4$   $[\text{M}+\text{Na}]^+$  361.11588, found 361.11560.

*1-Phenoxycarbonyl-2-phenyl-3,5-dibenzyloxy-1,2-dihydropyrazine (9a)*. Compound **9a** was prepared in 88% yield as a colorless syrup (3:2 mixture of rotamers):  $^1\text{H}$  NMR ( $\text{CDCl}_3$ , 500 MHz)  $\delta$  7.39–7.24 (m, 17H), 7.22–7.15 (m, 1H), 7.13–7.09 (m) and 7.04–6.99 (m) (total 2H), 6.14 and 6.10 (2s due to rotamers, 1H), 5.94 and 5.91 (2s due to rotamers, 1H), 5.41–5.27 (m, 2H), 5.02–4.90 (m, 2H);  $^{13}\text{C}$  NMR ( $\text{CDCl}_3$ , 125 MHz)  $\delta$  160.5, 160.3, 152.1, 151.5, 150.9, 150.6, 145.9, 145.6, 136.5, 136.4, 135.8, 135.5, 135.4, 135.2, 129.3 (2), 128.8, 128.7, 128.6 (2), 128.5, 128.4 (2), 128.3, 128.2, 128.1, 128.0, 127.9, 127.1, 126.6, 125.7, 125.6, 121.5, 121.4, 91.2, 90.9, 69.8, 69.7, 69.2, 69.0, 55.7, 54.6; HRMS (ESI)  $m/z$  calcd for  $\text{C}_{31}\text{H}_{27}\text{N}_2\text{O}_4$   $[\text{M}+\text{H}]^+$  491.19653, found 491.19661.

*1-Phenoxycarbonyl-2-(4-methoxyphenyl)-3,5-dibenzyloxy-1,2-dihydropyrazine (9b)*. Compound **9b** was prepared in 77% yield as a colorless syrup (3:2 mixture of rotamers):  $^1\text{H}$  NMR ( $\text{CDCl}_3$ , 500 MHz)  $\delta$  7.38–7.29 (m, 11H), 7.24–6.96 (m, 6H), 6.83 and 6.78 (2d due to rotamers,  $J = 8.0$  Hz), 6.10 and 6.07 (2s due to rotamers, 1H), 5.88 and 5.85 (2s due to rotamers, 1H), 5.40–5.27 (m, 2H), 5.04–4.93 (m, 2H), 3.81 and 3.78 (2s due to rotamers, 3H);  $^{13}\text{C}$  NMR ( $\text{CDCl}_3$ , 125 MHz)  $\delta$  166.8, 160.7, 159.8, 152.1, 151.5, 151.0, 150.8, 146.0, 145.7, 136.6, 136.5, 135.6 (2), 132.2, 129.4 (2), 128.7, 128.6, 128.5 (2), 128.4, 128.3, 128.2, 128.1 (3), 127.4, 125.8, 125.7, 121.6, 121.5, 114.2, 114.1, 113.5, 91.0, 90.8, 69.8, 69.7, 69.2, 69.0, 55.3(2), 55.2, 54.1; HRMS (ESI)  $m/z$  calcd for  $\text{C}_{32}\text{H}_{29}\text{N}_2\text{O}_5$   $[\text{M}+\text{H}]^+$  521.20710, found 521.20718.

*1-Phenoxycarbonyl-2-methyl-3-(benzyloxy)-5-ethyl-1,2-dihydropyrazine (10)*. Compound **10** was prepared in 81% yield as a colorless syrup (3:2 mixture of rotamers):  $^1\text{H}$  NMR ( $\text{CDCl}_3$ , 500 MHz)  $\delta$  7.46–7.30 (m, 7H), 7.30–7.19 (m, 1H), 7.17–7.10 (m, 2H), 6.29 and 6.24 (2s due to rotamers, 1H), 5.26 and 5.25 (2s due to rotamers, 2H), 4.91 and 4.86 (2q due to rotamers,  $J = 6.5$  Hz, 1H), 2.33–2.21 (m, 2H), (2d due to rotamers,  $J = 7.0$  Hz, 3H), 1.20–1.10 (m, 3H);  $^{13}\text{C}$  NMR ( $\text{CDCl}_3$ , 125 MHz)  $\delta$  161.3, 160.9, 151.4, 151.3, 151.0 (2), 150.8, 136.3, 132.5, 132.2, 129.6, 129.4 (2), 128.5 (2), 128.4, 128.2 (2), 128.1, 126.3, 125.7 (2), 121.6, 121.5, 120.9, 105.2, 104.7, 68.1, 67.9, 48.3, 47.5, 26.9, 15.7, 14.8, 12.4 (2); HRMS (ESI)  $m/z$  calcd for  $\text{C}_{21}\text{H}_{23}\text{N}_2\text{O}_3$   $[\text{M} + \text{H}]^+$  351.17032, found 351.17015.

*1-Phenoxycarbonyl-2-phenyl-3-benzyloxy-5-benzyl-1,2-dihydropyrazine (11).* Compound **11** was prepared in 81% yield as a colorless syrup (3:2 mixture of rotamers):  $^1\text{H}$  NMR ( $\text{CDCl}_3$ , 500 MHz)  $\delta$  7.44–7.08 (m) and 7.00 (d,  $J$  = 8.0 Hz) (total 20H), 6.52 and 6.46 (2s due to rotamers, 1H), 5.89 and 5.86 (2s due to rotamers, 1H), 5.33–5.15 (m, 2H), 3.65–3.49 (m, 2H);  $^{13}\text{C}$  NMR ( $\text{CDCl}_3$ , 125 MHz)  $\delta$  158.9, 151.8, 150.8, 150.6, 139.0, 136.0, 135.5, 130.4, 130.2, 129.4, 129.3, 129.1 (2), 128.7, 128.6, 128.5 (2), 128.4, 128.3 (2), 128.2 (2), 128.0 (2), 127.4, 126.8, 126.2 (2), 125.8, 125.7, 121.5, 121.4, 108.2, 107.4, 68.3, 68.2, 55.4, 54.0, 40.0 (2); HRMS (ESI)  $m/z$  calcd for  $\text{C}_{31}\text{H}_{27}\text{N}_2\text{O}_3$   $[\text{M}+\text{H}]^+$  475.20162, found 475.20297.

*1-Phenoxycarbonyl-2,5-diphenyl-3-benzyloxy-1,2-dihydropyrazine (12).* Compound **12** was prepared in 100% yield as a yellow syrup (3:2 mixture of rotamers):  $^1\text{H}$  NMR ( $\text{CDCl}_3$ , 500 MHz)  $\delta$  7.80 (d,  $J$  = 7.5 Hz, 2H), 7.47–7.20 (m, 16H), 7.20–7.13 (m, 2H), 7.03 (d,  $J$  = 8.5 Hz, 1H), 6.00 and 5.99 (2s due to rotamers, 1H), 5.53–5.37 (m, 2H);  $^{13}\text{C}$  NMR ( $\text{CDCl}_3$ , 125 MHz)  $\delta$  158.7, 151.9, 150.8, 150.6, 136.6, 136.4 (2), 136.1, 135.8, 129.2 (2), 128.9, 128.8, 128.7 (2), 128.5, 128.4 (2), 128.2 (2), 128.1, 127.2 (2), 127.3, 126.8, 126.0, 125.9, 124.6, 124.5, 121.5, 121.4, 108.4, 107.6, 68.6, 68.5, 55.7, 54.4; HRMS (ESI)  $m/z$  calcd for  $\text{C}_{30}\text{H}_{25}\text{N}_2\text{O}_3$   $[\text{M}+\text{H}]^+$  461.18597, found 461.18689.

*1-Phenoxycarbonyl-2-phenyl-3-benzyloxy-5-(benzyloxycarbonyl)-1,2-dihydropyrazine (13).* Compound **13** was prepared in 49% yield as a white solid (3:2 mixture of rotamers):  $^1\text{H}$  NMR ( $\text{CDCl}_3$ , 500 MHz)  $\delta$  7.97 and 7.90 (2br s due to rotamers, 1H), 7.48–7.43 (m, 2H), 7.41–7.22 (m, 16H), 7.14–7.09 (m, 1H), 6.96–6.92 (m, 1H), 5.90 (s, 1H), 5.45–5.31 (m, 4H);  $^{13}\text{C}$  NMR ( $\text{CDCl}_3$ , 125 MHz)  $\delta$  164.6, 158.7, 158.6, 151.4, 151.1, 150.4, 150.2, 136.6, 136.1, 135.6, 129.5, 129.0, 128.5 (2), 128.4, 128.3, 128.2, 127.8, 127.3, 126.7, 126.3, 122.1, 121.3, 121.2, 120.2, 69.0, 66.5, 56.3, 55.0; HRMS (ESI)  $m/z$  calcd for  $\text{C}_{32}\text{H}_{27}\text{N}_2\text{O}_5$   $[\text{M}+\text{H}]^+$  519.19145, found 519.19150.

**General procedure for the conversion of substituted 1,2-dihydropyrazines to  $\Delta^5$ -2-oxopiperazines using 1 M  $\text{HCl}_{(\text{aq})}$ /methanol.** Representative procedure for the preparation of phenyl 3-oxo-2-phenyl-3,4-dihydropyrazine-1(2H)-carboxylate (**14a**). To a solution of phenyl 3-(benzyloxy)-2-phenylpyrazine-1(2H)-carboxylate (**4b**, 0.100 g, 0.260 mmol) in anhydrous THF (1 mL) was added 1M  $\text{HCl}_{(\text{aq})}$  in methanol (1 mL) at 0 °C. Stirring was continued under nitrogen for 45 minutes until hydrolysis was completed as determined by TLC (silica gel, EtOAc/hexanes 2:3). The reaction mixture was quenched with saturated  $\text{NaHCO}_3$  (2 mL), extracted with dichloromethane ( $3 \times 10$  mL), dried over  $\text{Na}_2\text{SO}_4$  and concentrated in vacuo. Purification of the crude mixture by flash silica gel column chromatography (10–75% EtOAc/hexanes) afforded **15a** as a white solid (0.058 g, 61%, 1:1 mixture of rotamers): mp: 164–166 °C;  $^1\text{H}$  NMR ( $\text{CDCl}_3$ , 500 MHz)  $\delta$  8.28 and 8.02 (2br s due to rotamers, 1H), 7.58–7.43 (m, 2H), 7.43–7.29 (m, 5H), 7.29–7.18 (m, 1H), 7.14 (d,  $J$  = 8.5 Hz, 1H), 6.98 (d,  $J$  = 8.5 Hz, 1H), 5.96 and 5.93 (2s due to rotamers, 1H), 5.83–5.68 (m, 1H);  $^{13}\text{C}$  NMR ( $\text{CDCl}_3$ , 125 MHz)  $\delta$  166.1, 165.8, 151.8, 151.4, 150.6, 150.4, 136.5, 135.9, 129.4, 128.9, 128.8, 128.7, 126.9, 126.4, 126.0, 125.9, 121.3, 108.9, 108.7, 108.2, 60.9, 59.8; HRMS (ESI)  $m/z$  calcd for  $\text{C}_{17}\text{H}_{14}\text{NaN}_2\text{O}_3$   $[\text{M} + \text{Na}]^+$  317.08966, found 317.08968.

**Ring-opened side product methyl 2-((2-oxoethyl)(phenoxycarbonyl)amino)-2-phenylacetate (16).**  $^1\text{H}$  NMR ( $\text{CDCl}_3$ , 500 MHz, 4:1 mixture of rotamers)  $\delta$  3.81 and 3.84 (2s due to rotamers, 3H),

3.91–4.17 (m, 2H), 6.22 and 6.27 (2s due to rotamers, 1H), 7.12–7.26 (m, 3H), 7.28–7.32 (m, 2H), 7.35–7.44 (m, 5H), 9.40 and 9.49 (2s due to rotamers, 1H);  $^{13}\text{C}$  NMR ( $\text{CDCl}_3$ , 125 MHz, mixture of rotamers)  $\delta$  52.5, 52.6, 53.8, 54.0, 62.0, 62.7, 121.4, 125.8 (2), 128.8 (2), 129.3 (2), 133.3, 133.6, 150.7, 150.8, 154.4, 154.8, 170.8, 171.0, 197.7, 197.9; HRMS (ESI)  $m/z$  calcd for  $\text{C}_{18}\text{H}_{18}\text{NO}_5$   $[\text{M}+\text{H}]^+$  328.11795, found 328.11758.

**General procedure for the conversion of substituted 1,2-dihydropyrazines to  $\Delta^5$ -2-oxopiperazines using 4 M HCl/dioxane.** Representative procedure for the preparation of phenyl 3-oxo-2-phenyl-3,4-dihydropyrazine-1(2H)-carboxylate (**14a**). To a solution of phenyl 3-(benzyloxy)-2-phenylpyrazine-1(2H)-carboxylate (**4b**, 0.100 g, 0.260 mmol) in anhydrous THF (1 mL) was added 4 M HCl in dioxane (1 mL) at 0 °C. Stirring was continued under nitrogen for 20 minutes until hydrolysis was completed as determined by TLC (silica gel, EtOAc/hexanes 2:3). The reaction mixture was quenched with water (2 mL) and extracted with dichloromethane ( $3 \times 15$  mL). The organic phase was washed with saturated  $\text{NaHCO}_3$  (25 mL), dried over  $\text{Na}_2\text{SO}_4$  and concentrated in vacuo. Purification of the crude mixture by flash silica gel column chromatography (10–75% EtOAc/hexanes) afforded **14a** as a white solid (0.259 g, 100%).

**Phenyl 2-benzyl-3-oxo-3,4-dihydropyrazine-1(2H)-carboxylate (14b).** Compound **14b** was prepared in 95% yield as a white crystalline solid (3:2 mixture of rotamers): mp: 128–130 °C;  $^1\text{H}$  NMR ( $\text{CDCl}_3$ , 500 MHz)  $\delta$  8.44 and 8.39 (2s due to rotamers, 1H), 7.43–7.10 (m, 8H), 6.93 (d,  $J$  = 8.0 Hz, 1H), 6.55 (d,  $J$  = 8.0 Hz, 1H), 6.55 (d,  $J$  = 8.0 Hz, 1H), 6.55 (d,  $J$  = 8.0 Hz, 1H), 6.44 and 6.37 (2d due to rotamers,  $J$  = 5.5 Hz, 1H), 5.20–5.05 (m, 1H), 5.80 and 5.60 (2d due to rotamers,  $J$  = 4.5 Hz, 1H), 3.21–2.97 (m, 2H);  $^{13}\text{C}$  NMR ( $\text{CDCl}_3$ , 125 MHz)  $\delta$  167.0, 166.9, 151.7, 151.2, 150.6, 150.1, 135.7, 135.5, 129.7, 129.3, 129.1, 128.7, 128.4, 127.1, 127.0, 125.8, 125.7, 121.3, 121.2, 110.4, 109.1, 108.0, 107.8, 59.1, 57.8, 36.0, 35.9; HRMS (ESI)  $m/z$  calcd for  $\text{C}_{18}\text{H}_{16}\text{NaN}_2\text{O}_3$   $[\text{M}+\text{Na}]^+$  331.10531, found 331.10499.

**Phenyl 2-(2-bromobenzyl)-3-oxo-3,4-dihydropyrazine-1(2H)-carboxylate (14c).** Compound **14c** was prepared in 85% yield as a white solid (1:1 mixture of rotamers): mp: 40–42 °C;  $^1\text{H}$  NMR ( $\text{CDCl}_3$ , 500 MHz)  $\delta$  8.34 and 8.30 (2br s due to rotamers, 1H), 7.54 (t,  $J$  = 8.5 Hz, 2H), 7.35–7.10 (m) and 6.93 (d,  $J$  = 7.5 Hz) (total 5H), 6.62 (d,  $J$  = 7.5 Hz, 1H), 6.48–6.40 (m, 1H), 5.86 and 5.65 (2t due to rotamers,  $J$  = 5.0 Hz, 1H), 5.38–5.32 (m) and 5.29–5.24 (m) (total 1H), 3.79–3.74 (m) and 3.68–3.61 (m) (total 1H), 3.42 and 3.39 (dt,  $J$  = 5.0 Hz), 3.35 and 3.34 (dd,  $J$  = 4.0 Hz, (total 1H), 3.17–3.08 (m, 1H);  $^{13}\text{C}$  NMR ( $\text{CDCl}_3$ , 125 MHz)  $\delta$  166.6, 166.4, 151.5, 151.2, 150.6, 150.1, 135.3, 135.2, 133.0, 132.9, 131.8, 131.7, 129.4, 129.3, 129.1, 128.9, 128.8, 127.6, 127.2, 125.8, 125.7, 125.4, 125.3, 121.4, 121.3, 121.0, 110.4, 109.2, 108.1, 108.0, 72.2, 71.1, 61.6, 57.1, 56.5, 42.8, 36.0, 35.7; HRMS (ESI)  $m/z$  calcd for  $\text{C}_{18}\text{H}_{16}\text{BrN}_2\text{O}_3$   $[\text{M} + \text{H}]^+$  387.03388, found 387.03360.

**Phenyl 5-(4-methoxyphenyl)-3-oxo-2-phenyl-3,4-dihydropyrazine-1(2H)-carboxylate (15a).** Compound **15a** was prepared in 73% yield as a white solid (1:1 mixture of rotamers): mp: 206–208 °C;  $^1\text{H}$  NMR ( $\text{CDCl}_3$ , 500 MHz)  $\delta$  7.87 and 7.70 (2br s due to rotamers, 1H), 7.48 (t,  $J$  = 6.0 Hz, 2H), 7.41–7.30 (m, 7H), 7.26–7.21 (m, 1H), 7.17 (d,  $J$  = 8.0 Hz, 1H), 7.01 (d,  $J$  = 8.0 Hz, 1H), 6.93 (dd,  $J$  = 4.0, 8.5 Hz, 1H), 6.84 and 6.77 (2s due to rotamers, 1H), 6.02 (d,  $J$  = 11.5 Hz, 1H), 3.82 (s, 3H);  $^{13}\text{C}$  NMR ( $\text{CDCl}_3$ , 125 MHz)  $\delta$  166.0, 165.8, 160.1 (2), 152.0, 151.8, 150.8, 150.6, 136.3, 135.8, 129.5, 129.3, 129.2, 129.0, 128.9, 128.8, 128.7, 126.9, 126.4, 126.1, 126.0

(2), 124.6, 122.1 (2), 121.5, 121.4, 114.5, 104.7, 104.2, 60.6, 59.5, 55.4; HRMS (ESI)  $m/z$  calcd for  $C_{24}H_{21}N_2O_4$   $[M]^+$  400.14958, found 400.14878.

**General procedure for the one-pot Grignard addition/hydrolysis reaction to synthesize substituted  $\Delta^5$ -2-oxopiperazines 15b–d.** Representative procedure for the preparation of phenyl 5-ethyl-3-oxo-2-phenyl-3,4-dihydropyrazine-1(2H)-carboxylate (**15b**). To a solution of 2-(benzyloxy)-6-ethylpyrazine (0.100 g, 0.467 mmol) in anhydrous THF (4 mL) was added phenyl chloroformate (0.07 mL, 0.556 mmol) at 0 °C and stirred under a nitrogen atmosphere until salt formation was completed (15 min, as determined by TLC on neutral alumina, EtOAc/hexanes 1:19). The reaction mixture was cooled to –41 °C, phenylmagnesium bromide solution (1 M in THF, 0.56 mL, 0.556 mmol) was added and the mixture stirred for 2 h. Then, the reaction was quenched with 1 M HCl solution in MeOH (2 mL) at –41 °C, allowed to reach room temperature and stirred for 1 h. The reaction mixture was neutralized with aqueous  $NaHCO_3$  solution, extracted with EtOAc (20 mL), washed with brine, dried over  $Na_2SO_4$  and concentrated under reduced pressure. The resulted crude material was purified by flash silica gel column chromatography (Combiflash Rf) using EtOAc/hexanes 1:3 to obtain **15b** (0.120 g, 80%) as a colorless syrup (1:1 mixture of rotamers):  $^1H$  NMR ( $CDCl_3$ , 500 MHz)  $\delta$  7.58 and 7.82 (2br s due to rotamers, 1H, NH), 7.42 (t,  $J$  = 7.5 Hz, 2H), 7.32–7.40 (m, 5H), 7.18–7.24 (m, 1H), 7.14 (d,  $J$  = 8.0 Hz, 1H), 7.00 (d,  $J$  = 8.5 Hz, 1H), 6.31 and 6.35 (2s due to rotamers, 1H), 5.94 and 5.96 (2s due to rotamers, 1H), 2.18–2.26 (m, 2H), 1.12–1.18 (m, 3H).  $^{13}C$  NMR ( $CDCl_3$ , 125 MHz)  $\delta$  166.6, 166.5, 151.8, 151.7, 150.7, 150.5, 136.3, 135.8, 129.3, 128.8, 128.7, 128.5 (2), 126.8, 126.3, 125.8, 125.7, 123.9, 123.8, 121.4, 121.3, 103.4, 103.0, 60.2, 59.0, 23.3, 11.5, 11.4; HRMS (ESI)  $m/z$  calcd for  $C_{19}H_{19}N_2O_3$   $[M+H]^+$  323.13902, found 323.13895.

**Phenyl 5-benzyl-3-oxo-2-phenyl-3,4-dihydropyrazine-1(2H)-carboxylate (15c).** Compound **15c** was prepared in 72% yield as an orange solid (1:1 mixture of rotamers): mp: 88–90 °C;  $^1H$  NMR ( $CDCl_3$ , 500 MHz)  $\delta$  8.49 and 8.14 (2br s due to rotamers, 1H), 7.40–7.13 (m, 14H), 7.01 (d,  $J$  = 8.0 Hz, 1H), 6.50 and 6.47 (2s due to rotamers, 1H), 5.90 (d, 1H,  $J$  = 4.5 Hz), 3.48–3.54 (m, 2H);  $^{13}C$  NMR ( $CDCl_3$ , 125 MHz)  $\delta$  165.9, 165.6, 151.8, 151.6, 150.7, 150.5, 136.0, 135.8, 135.7, 135.5, 129.4, 128.8, 128.7 (3), 128.6, 128.5, 127.2, 126.9, 126.3, 125.9, 125.8, 121.4 (2), 121.2, 105.5, 104.9, 60.3, 59.1, 36.4 (2); HRMS (ESI)  $m/z$  calcd for  $C_{19}H_{18}N_2NaO_3$   $[M+Na]^+$  407.13661, found 407.13640.

**Phenyl 3-oxo-2,5-diphenyl-3,4-dihydropyrazine-1(2H)-carboxylate (15d).** Compound **15d** was prepared in 71% yield as a white solid (1:1 mixture of rotamers): mp: 208–210 °C;  $^1H$  NMR ( $CDCl_3$ , 500 MHz)  $\delta$  7.63–7.34 (m, 13H), 7.25–7.21 (m, 1H), 7.17 and 7.01 (2d due to rotamers,  $J$  = 8.0 Hz, 2H), 6.97 and 6.90 (2s due to rotamers, 1H), 6.03 (d,  $J$  = 12.5 Hz, 1H);  $^{13}C$  NMR ( $CDCl_3$ , 125 MHz)  $\delta$  59.7, 60.8, 105.5, 106.0, 121.4, 121.5, 121.8 (2), 124.4, 124.5, 126.0, 126.1, 126.3, 126.8, 128.8, 129.0 (2), 129.3, 129.5, 132.2, 135.8, 136.2, 148.7, 150.5, 150.7, 151.7, 152.0, 165.2, 165.3; HRMS (ESI)  $m/z$  calcd for  $C_{23}H_{18}N_2NaO_3$   $[M+Na]^+$  393.1215, obsd 393.1206.

## References

- 1 (a) Masuda, H.; Mihara, S. *Agric. Biol. Chem.* **1989**, *53*, 3367–3368. (b) Lanni, E. L.; Bosscher, M. A.; Ooms, B. D.; Shandro, C. A.; Ellsworth, B. A.; Anderson, C. E. *J. Org. Chem.* **2008**, *73*, 6425–6428.
- 2 Smith, C. L.; Hirschhaeuser, C.; Malcolm, G. K.; Nasrallah, D. J.; Gallagher, T. *Synlett* **2014**, *25*, 1904–1908.
- 3 Liu, C.; Yang, W. *Chem. Commun.*, **2009**, 6267–6269
- 4 2,6-Dimethoxypyrazine (**1f**) and 2,6-bis(benzyloxy)pyrazine (**1g**) were synthesis from 1,6-dichloropyrazine. Guillou, S.; Jacob, G.; Terrier, F.; Goumont, R. *Tetrahedron* **2009**, *65*, 8891–8895.
- 5 Niedermann, H.-P.; Munro, D. Brit. UK Pat. Appl., 2285045, 28 Jun 1995.
- 6 Motohashi, K.; Inaba, K.; Fuse, S.; Doi, T.; Izumikawa, M.; Khan, S. T.; Takagi, M.; Takahshi, T.; Shin-ya, K. *J. Nat. Prod.* **2011**, *74*, 1630–1635.

## 2-(4-Methoxybenzyloxy)pyrazine (1c)

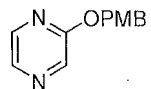

Sample: DBR-4-593  
Sample ID: s\_20120319\_04  
File: s\_20120319\_04/data/cdcl3\_

Pulse Sequence: s2pul  
Solvent: cdcl3  
Temp. 26.0 C / 299.1 K  
Operator: walkup  
File: cdcl3\_01  
VNMR5-500 "NMR500"

Relax. delay 1.000 sec  
Pulse 45.0 degrees  
Acq. time 2.049 sec  
Width 8012.8 Hz  
8 repetitions  
OBSERVE H1, 499.7316307 MHz  
DATA PROCESSING  
Resol. enhancement -0.0 Hz  
FT size 65536  
Total time 0 min, 31 sec

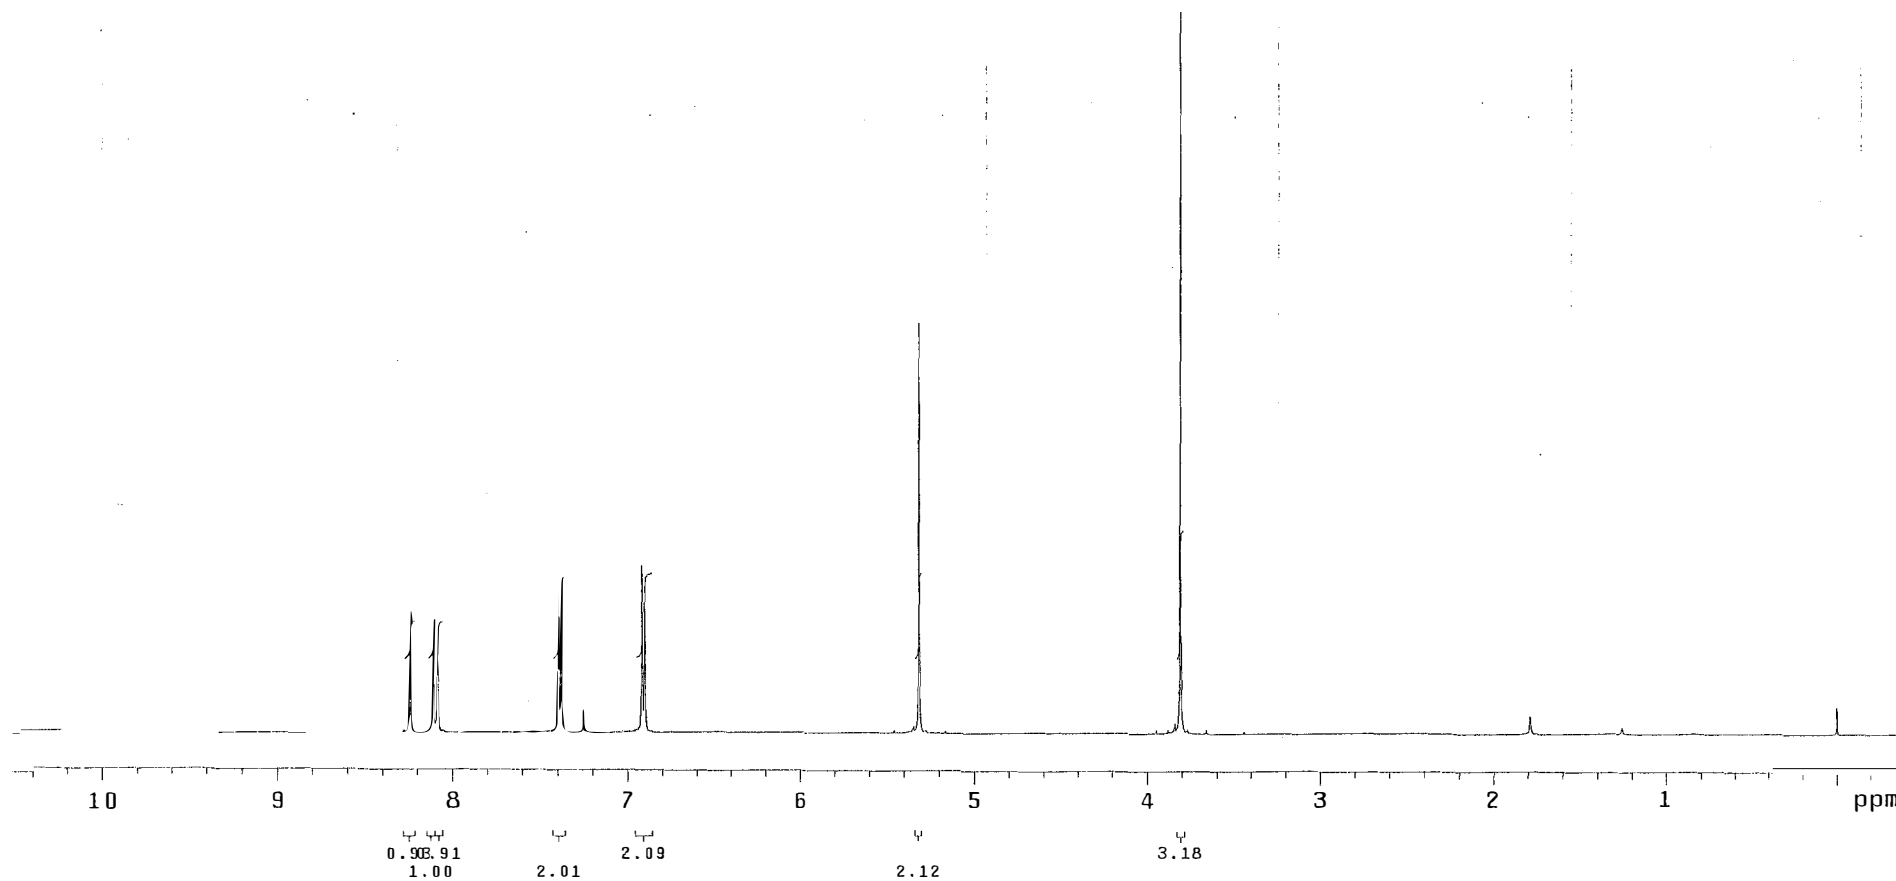

## 2-(4-Methoxybenzyloxy)pyrazine (1c)

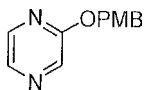

Sample: DBR-4-593  
Sample ID: s\_20120319\_05  
File: s\_20120319\_05/data/cdcl3\_

Pulse Sequence: s2pul  
Solvent: cdcl3  
Temp. 26.0 C / 299.1 K  
Operator: walkup  
File: cdcl3\_01  
VNMR5-500 "NMR500"

Relax. delay 1.000 sec  
Pulse 45.0 degrees  
Acq. time 1.300 sec  
Width 30487.8 Hz  
256 repetitions  
OBSERVE C13, 125.6576224 MHz  
DECOUPLE H1, 499.7341220 MHz  
Power 42 dB  
continuously on  
WALTZ-16 modulated  
DATA PROCESSING  
Line broadening 0.5 Hz  
FT size 131072  
Total time 9 min, 51 sec

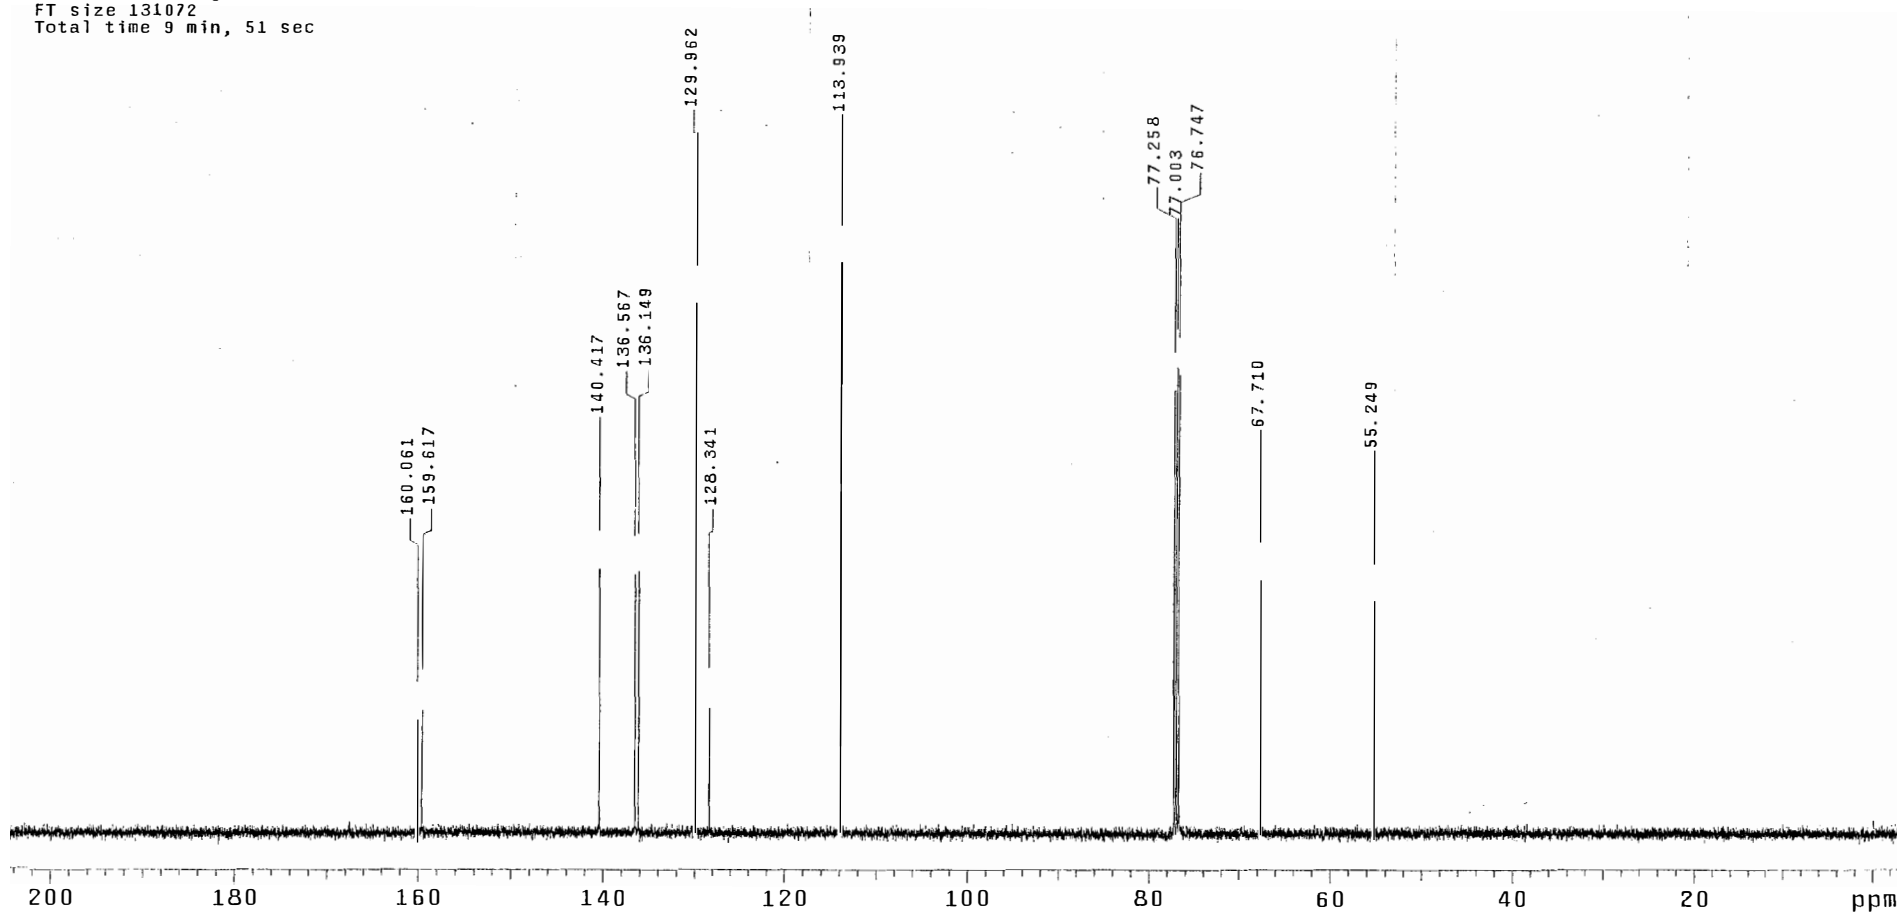

Band 1

Sample: VRS-6-111  
Sample ID: s\_20120926\_07  
File: s\_20120926\_07/data/cdc13\_01.fid

Pulse Sequence: s2pul

Solvent: cdc13  
Temp. 26.0 C / 299.1 K  
Operator: walkup  
File: cdc13\_01  
VNMR5-500 "NMR500"

## 2-Chloro-6-methoxypyrazine

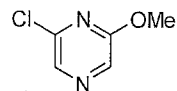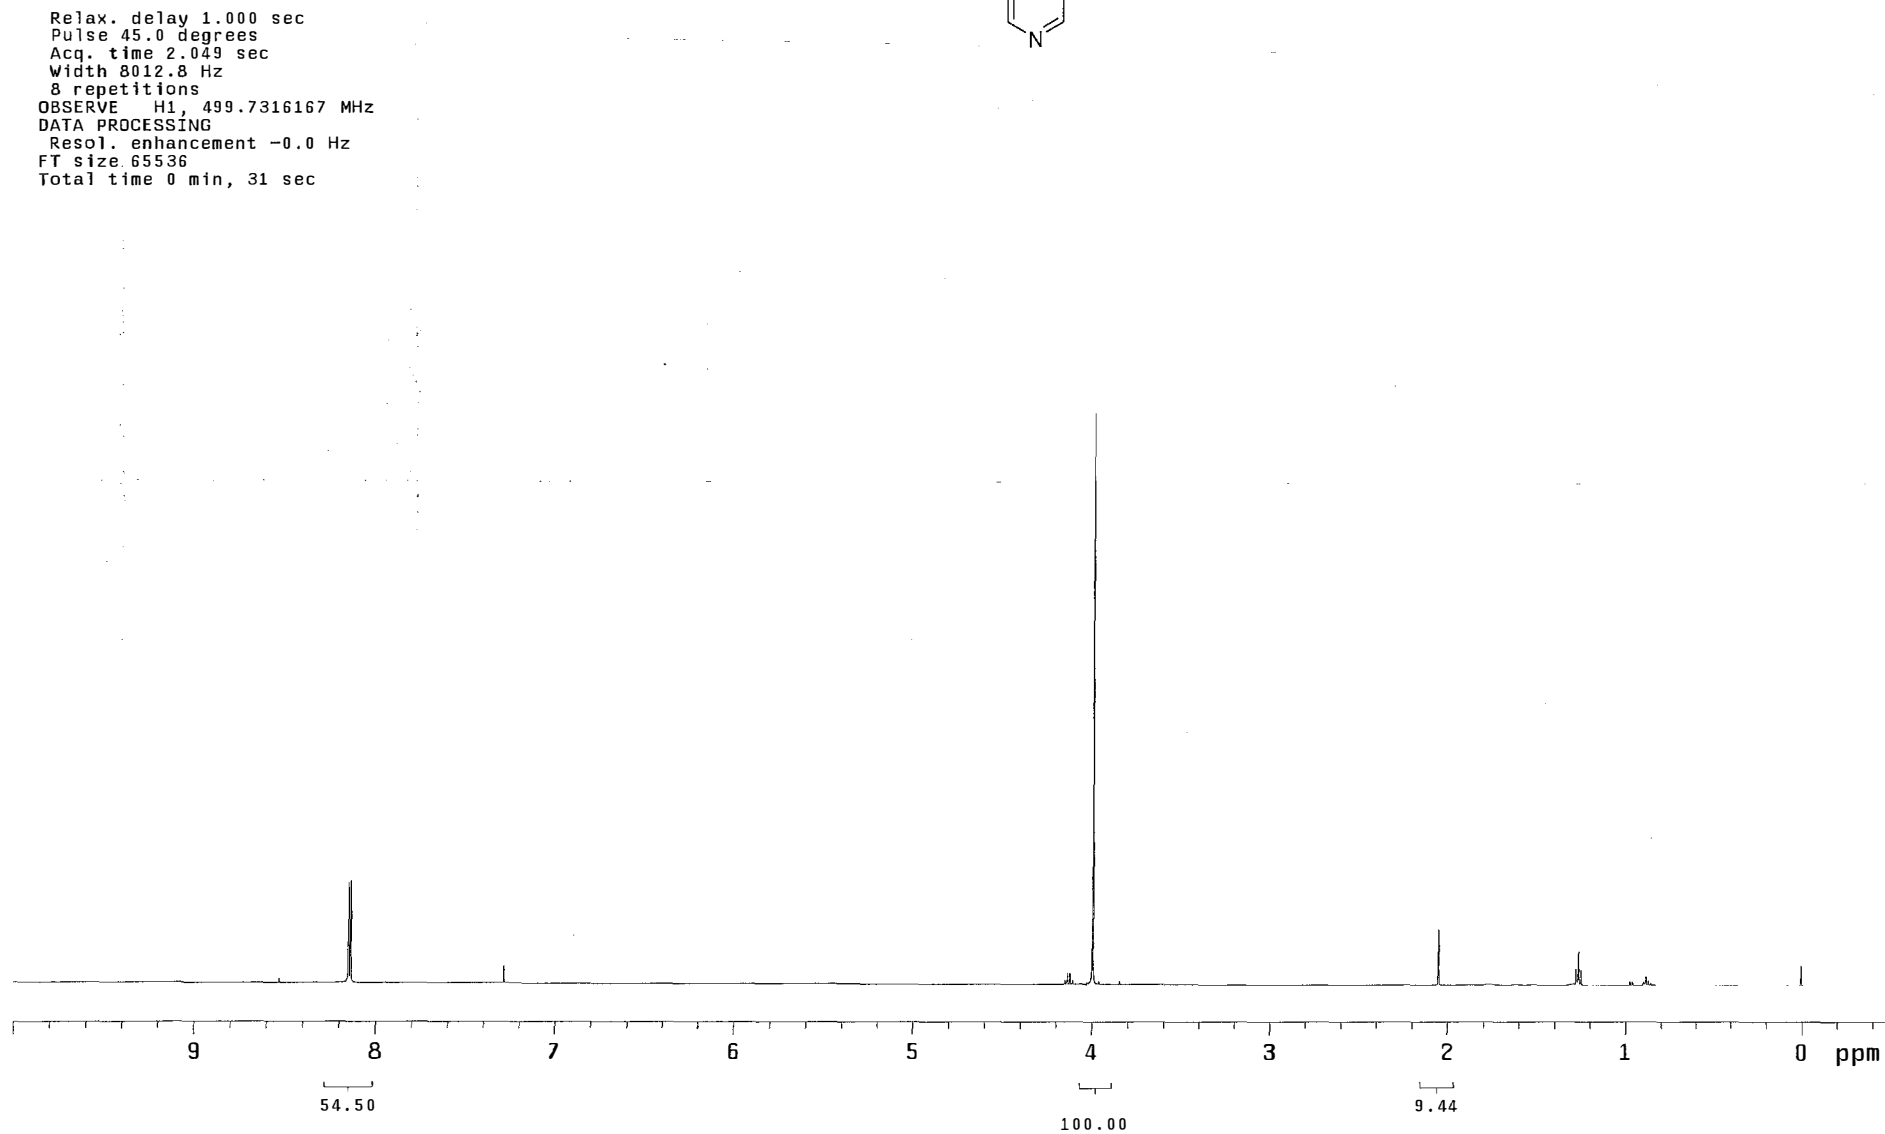



Band 1

Sample: VRS-6-111  
Sample ID: s\_20120926\_08  
File: s\_20120926\_08/data/cdc13\_01.fid

## 2-Chloro-6-methoxypyrazine

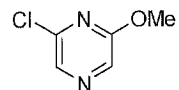

Pulse Sequence: s2pu1  
Solvent: cdc13  
Temp. 26.0 C / 299.1 K  
Operator: walkup  
File: cdc13\_01  
VNMR5-500 "NMR500"

Relax. delay 1.000 sec  
Pulse 45.0 degrees  
Acq. time 1.300 sec  
Width 30487.8 Hz  
256 repetitions  
OBSERVE C13, 125.6576166 MHz  
DECOUPLE H1, 499.7341220 MHz  
Power 42 dB  
continuously on  
WALTZ-16 modulated  
DATA PROCESSING  
Line broadening 0.5 Hz  
FT size 131072  
Total time 9 min, 51 sec

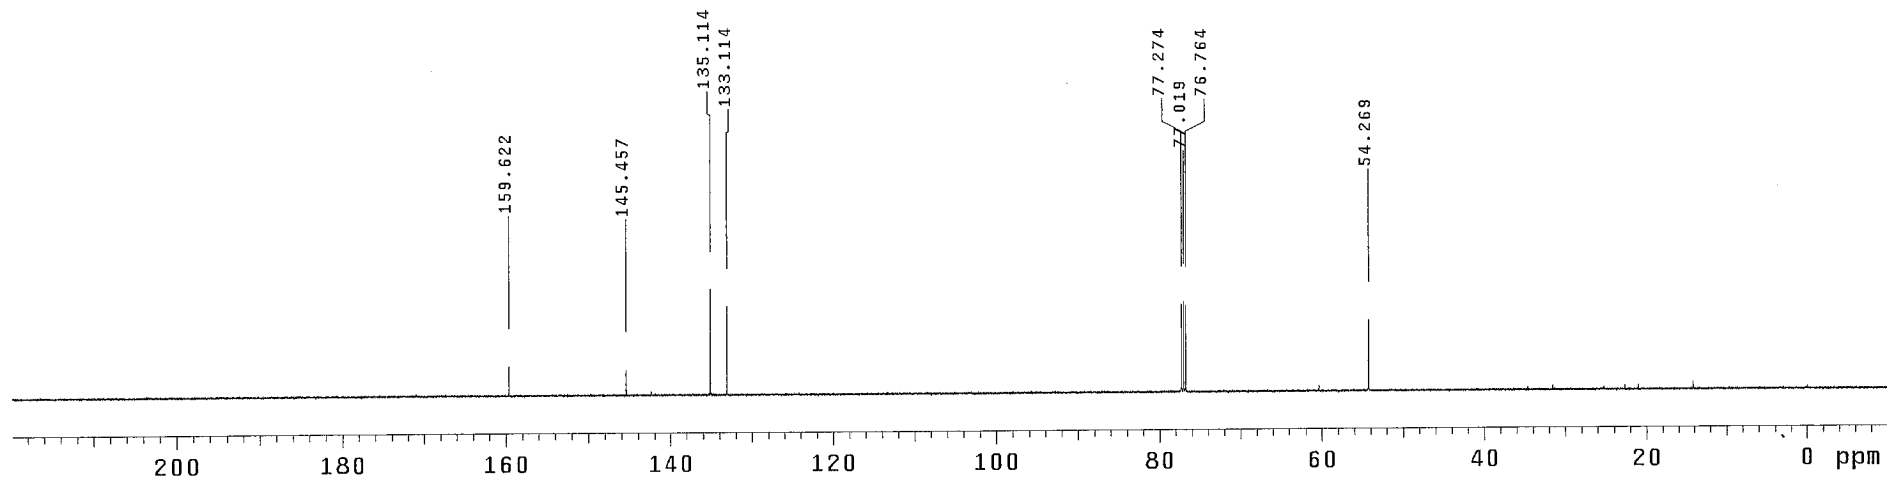

2-Methoxy-6-phenylpyrazine

Sample: VRS-6-114  
Sample ID: s\_20120930\_01  
File: s\_20120930\_01/data/cdc13\_01.fid

Pulse Sequence: s2pul

Solvent: cdc13  
Temp. 26.0 C / 299.1 K  
Operator: walkup  
File: cdc13\_01  
VNMR5-500 "NMR500"

Relax. delay 1.000 sec  
Pulse 45.0 degrees  
Acq. time 2.049 sec  
Width 8012.8 Hz  
8 repetitions  
OBSERVE H1, 499.7316268 MHz  
DATA PROCESSING  
Resol. enhancement -0.0 Hz  
FT size 65536  
Total time 0 min, 31 sec

2-Methoxy-6-phenylpyrazine (1d)

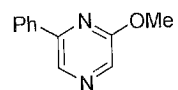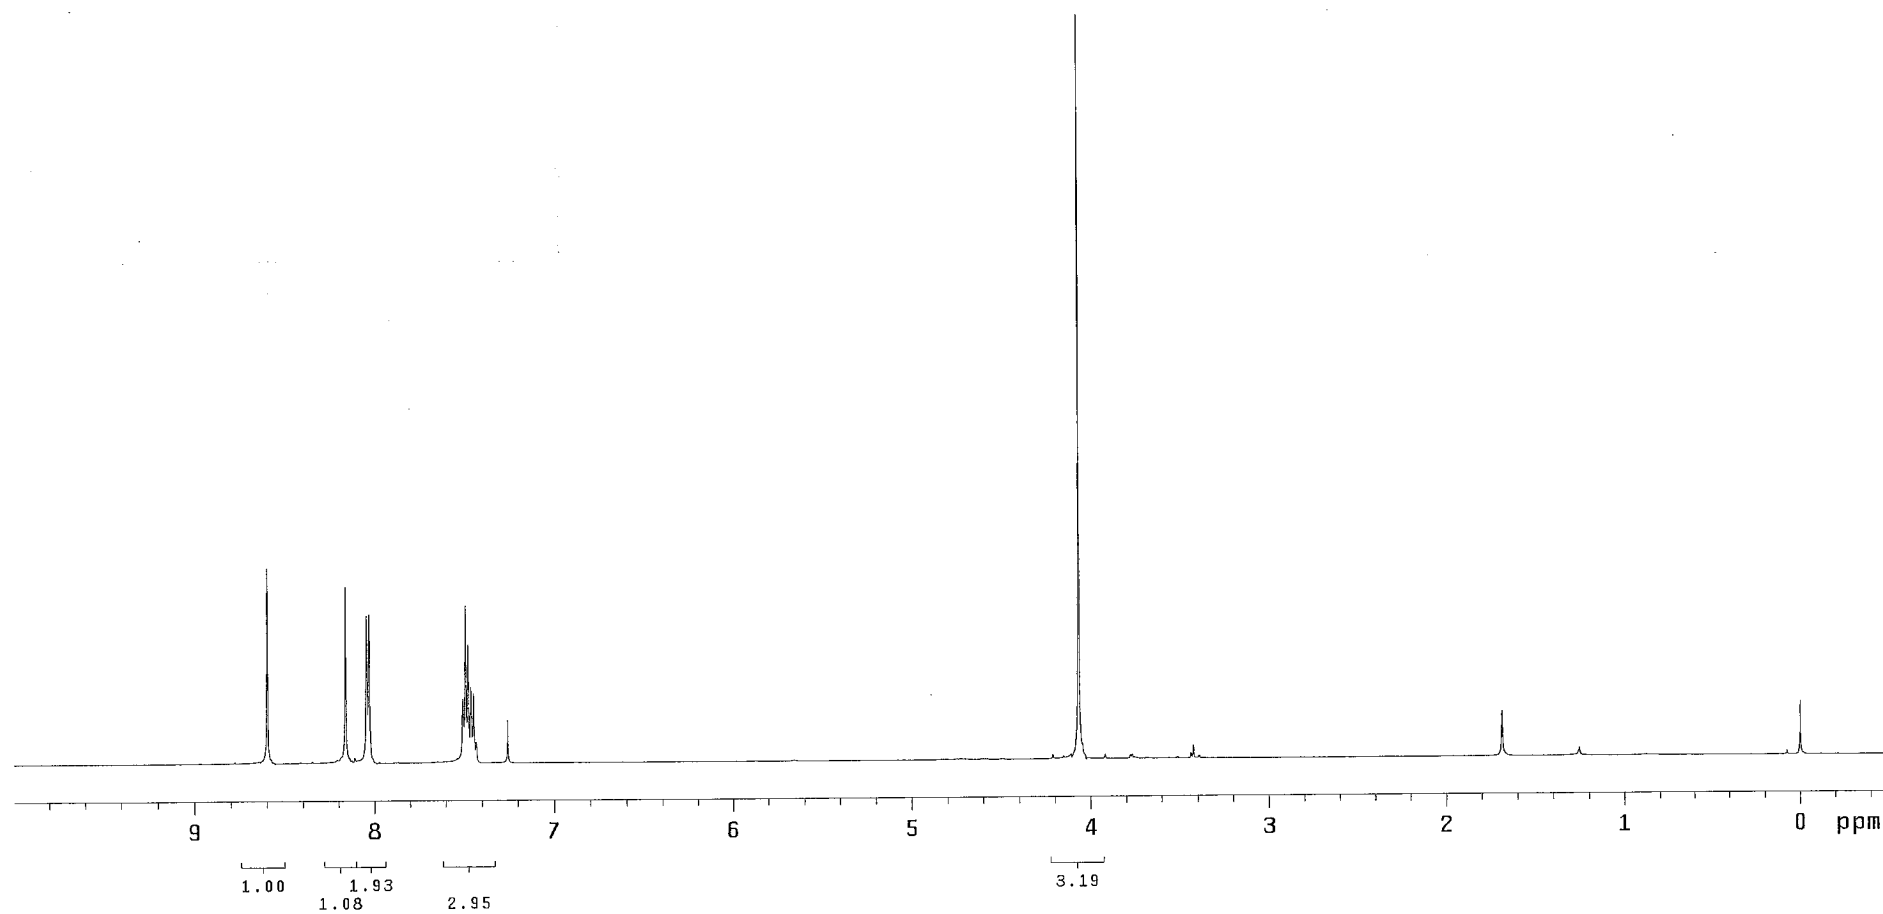

Purified (suzuki)

Sample: VRS-6-114  
Sample ID: s\_20120930\_02  
File: s\_20120930\_02/data/cdc13\_01.fid

Pulse Sequence: s2pu1

Solvent: cdcl3  
Temp. 26.0 C / 299.1 K  
Operator: walkup  
File: cdc13\_01  
VNMRS-500 "NMR500"

## 2-Methoxy-6-phenylpyrazine (1d)

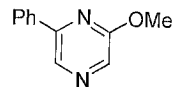

Relax. delay 1.000 sec  
Pulse 45.0 degrees  
Acq. time 1.300 sec  
Width 30487.8 Hz  
256 repetitions  
OBSERVE C13, 125.6576166 MHz  
DECOUPLE H1, 499.7341220 MHz  
Power 42 dB  
continuously on  
WALTZ-16 modulated  
DATA PROCESSING  
Line broadening 0.5 Hz  
FT size 131072  
Total time 9 min, 51 sec

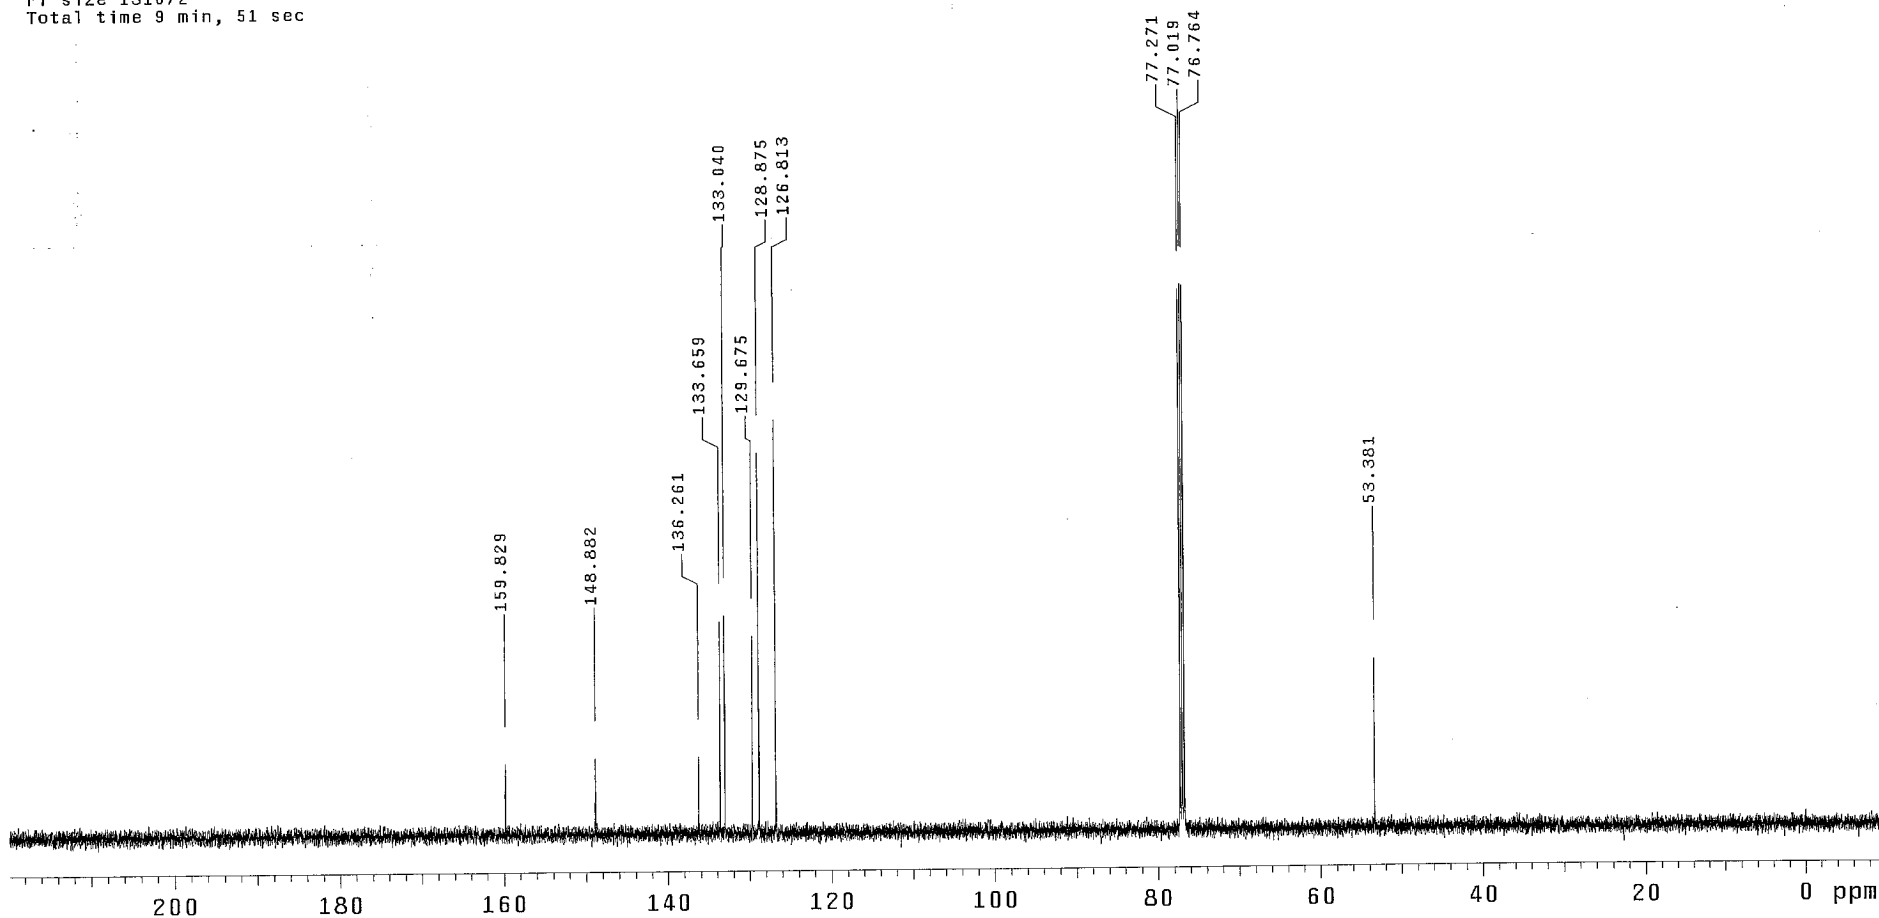

## 2-(Benzyloxy)-6-chloropyrazine

Sample: DBR-3-447-R  
Sample ID: s\_20120111\_02  
File: s\_20120111\_02/data/cdcl3\_01.fid

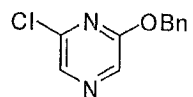

Pulse Sequence: s2pu1  
Solvent: cdcl3  
Temp. 26.0 C / 299.1 K  
Operator: walkup  
File: cdcl3\_01  
VNMRS-500 "NMR500"

Relax. delay 1.000 sec  
Pulse 45.0 degrees  
Acq. time 2.049 sec  
Width 8012.8 Hz  
8 repetitions  
OBSERVE H1, 499.7316295 MHz  
DATA PROCESSING  
Resol. enhancement -0.0 Hz  
FT size 65536  
Total time 0 min, 31 sec

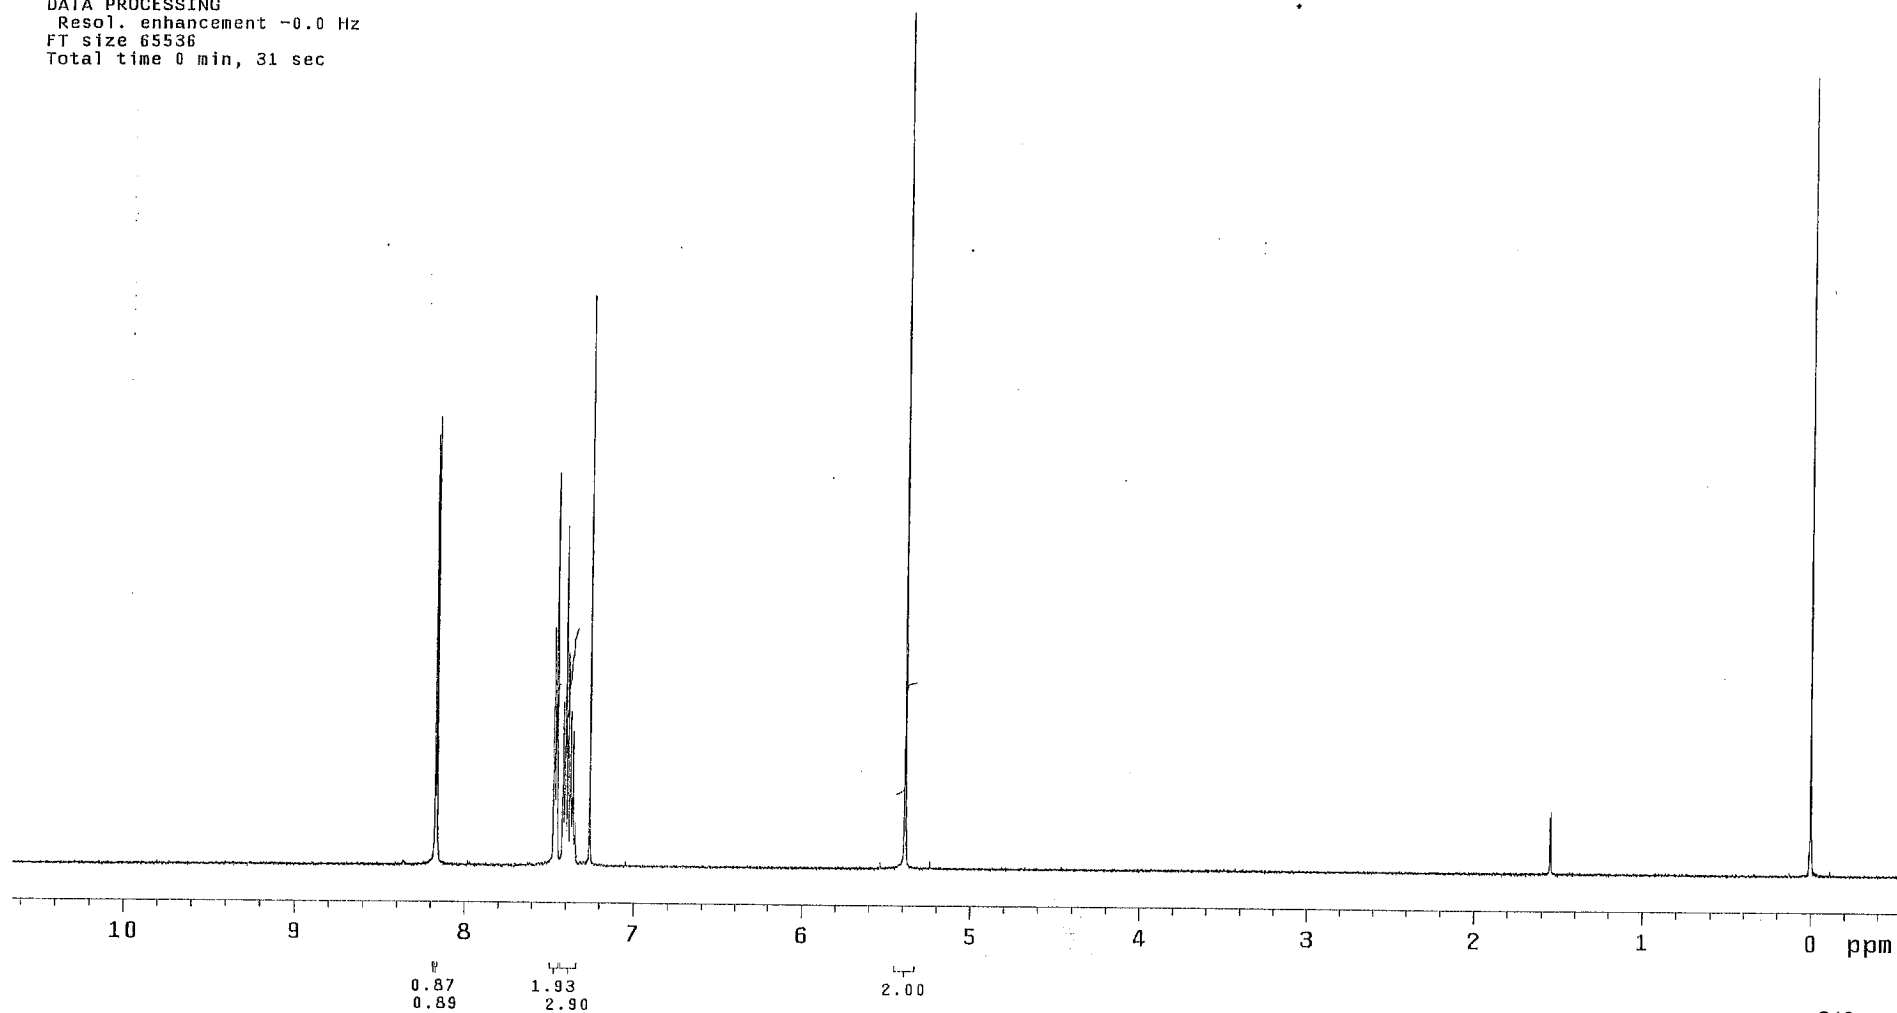

## 2-(Benzyloxy)-6-chloropyrazine

Sample: DBR-3-447  
Sample ID: s\_20101203\_08  
File: 00772.fid

Pulse Sequence: s2pu1

Solvent: cdcl3  
Temp. 26.0 C / 299.1 K  
Operator: walkup  
File: 00772  
VNMRS-500 "NMR500"

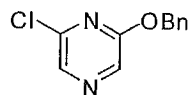

Relax. delay 1.000 sec  
Pulse 45.0 degrees  
Acq. time 1.300 sec  
Width 30487.8 Hz  
256 repetitions  
OBSERVE C13, 125.6576217 MHz  
DECOUPLE H1, 499.7341220 MHz  
Power 42 dB  
continuously on  
WALTZ-16 modulated  
DATA PROCESSING  
Line broadening 0.5 Hz  
FT size 131072  
Total time 9 min, 51 sec

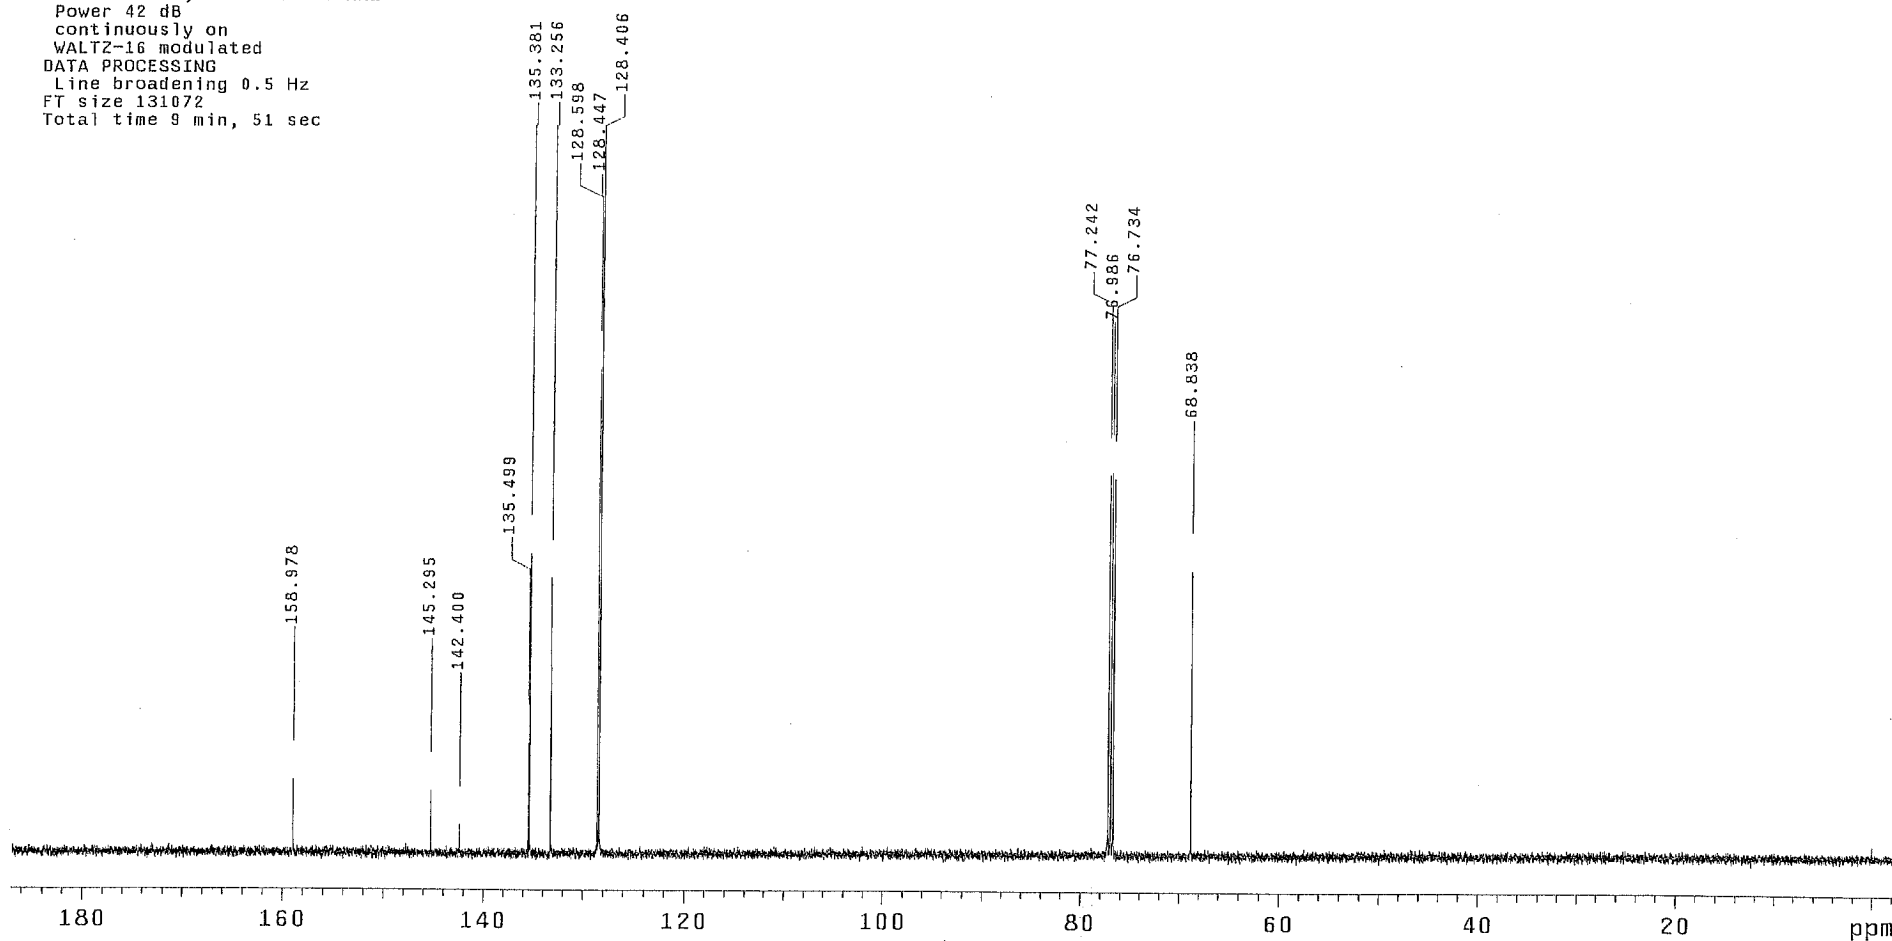

Sample: DBR-4-611  
Sample ID: s\_20120705\_02  
File: s\_20120705\_02/data/cdc13\_01.fid

Pulse Sequence: s2pul  
Solvent: cdcl3  
Temp. 26.0 C / 299.1 K  
Operator: walkup  
File: cdcl3\_01  
VNMR5-500 "NMR500"

Relax. delay 1.000 sec  
Pulse 45.0 degrees  
Acq. time 2.049 sec  
Width 8012.8 Hz  
8 repetitions  
OBSERVE H1, 499.7316322 MHz  
DATA PROCESSING  
Resol. enhancement -0.0 Hz  
FT size 65536  
Total time 0 min, 31 sec

## 2-Benzyloxy-6-ethylpyrazine (1h)

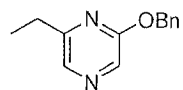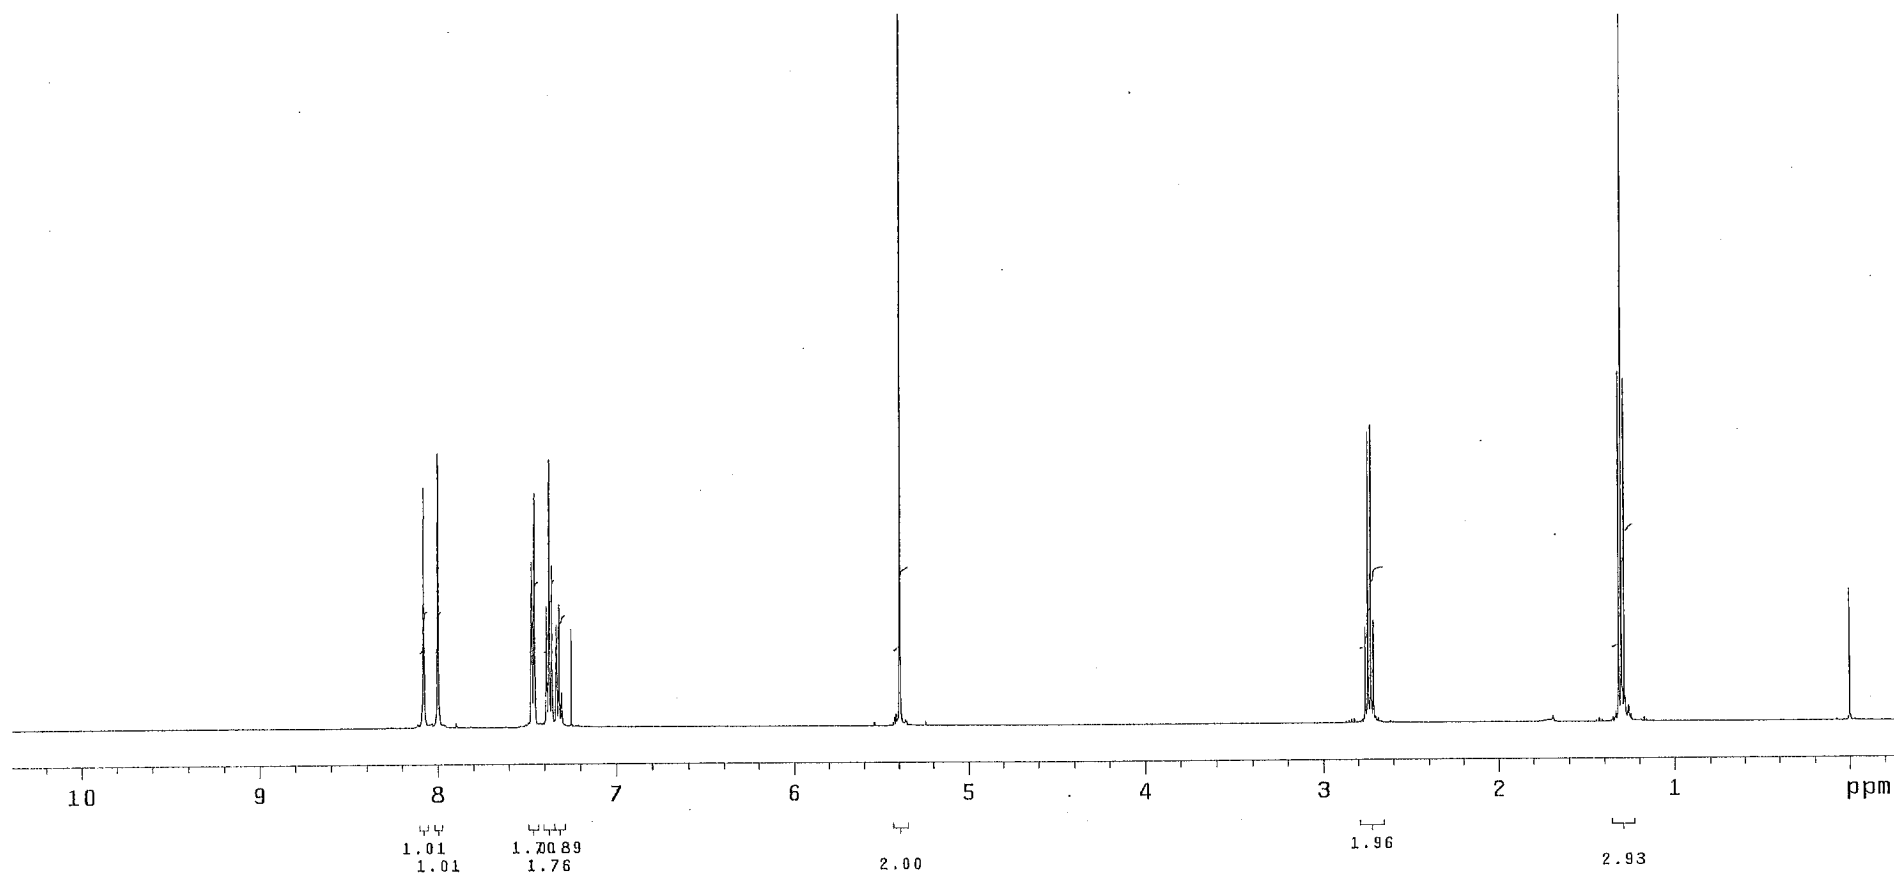

## 2-Benzyloxy-6-ethylpyrazine (1h)

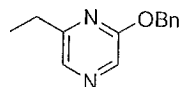

Sample: DBR-4-611  
Sample ID: s\_20120705\_03  
File: s\_20120705\_03/data/cdcl3\_01.fid

Pulse Sequence: s2pu1

Solvent: cdcl3  
Temp. 26.0 C / 299.1 K  
Operator: walkup  
File: cdcl3\_01  
VNMR5-500 "NMR500"

Relax. delay 1.000 sec  
Pulse 45.0 degrees  
Acq. time 1.300 sec  
Width 30487.8 Hz  
256 repetitions  
OBSERVE C13, 125.6576199 MHz  
DECOUPLE H1, 499.7341220 MHz  
Power 42 dB  
continuously on  
WALTZ-16 modulated  
DATA PROCESSING  
Line broadening 0.5 Hz  
FT size 131072  
Total time 9 min, 51 sec

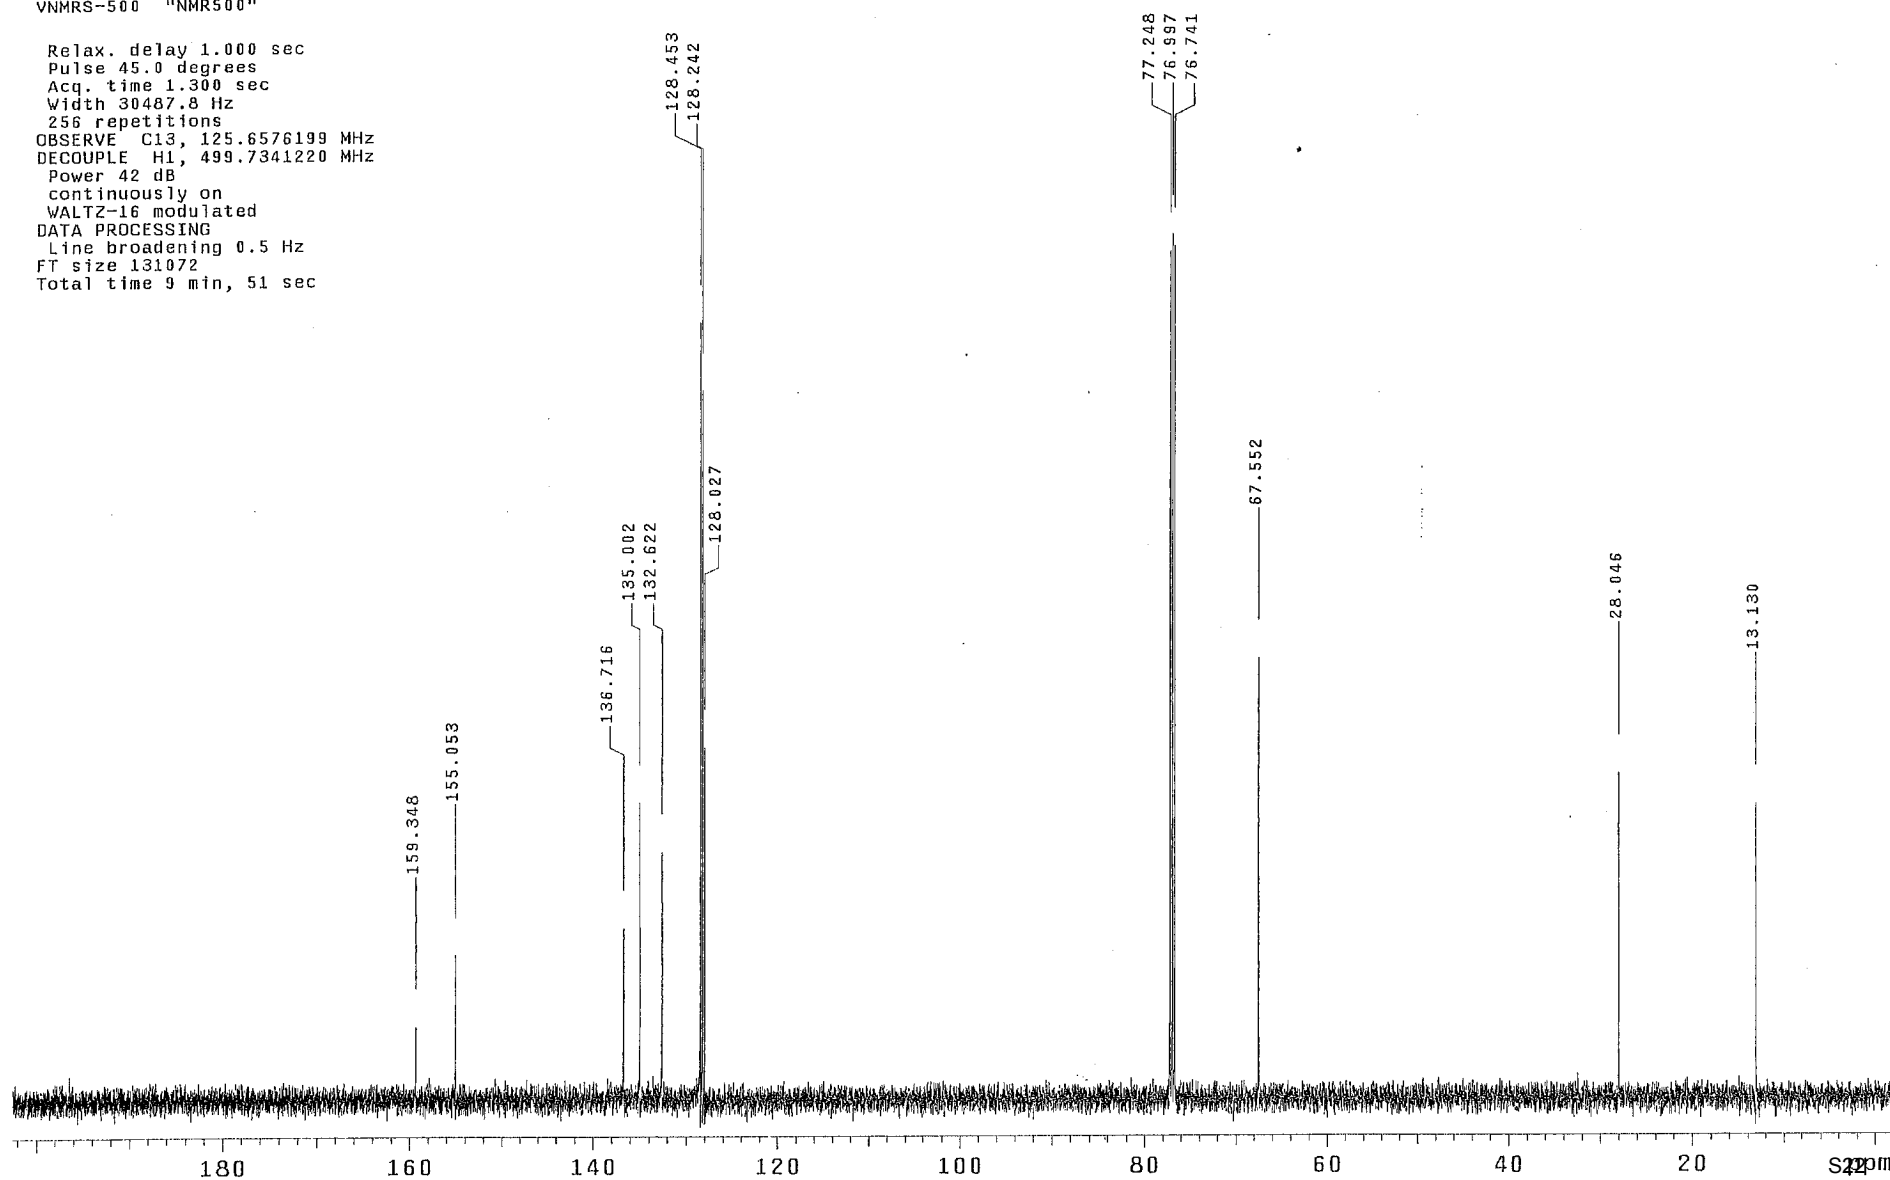

Sample: DBR-4-613  
Sample ID: s\_20120712\_03  
File: s\_20120712\_03/data/cdcl3\_01.fid

Pulse Sequence: s2pu1  
Solvent: cdcl3  
Temp. 26.0 C / 299.1 K  
Operator: walkup  
File: cdcl3\_01  
VNMRS-500 "NMR500"

## 2-Benzyl-6-benzylozypyrazine (1i)

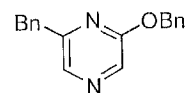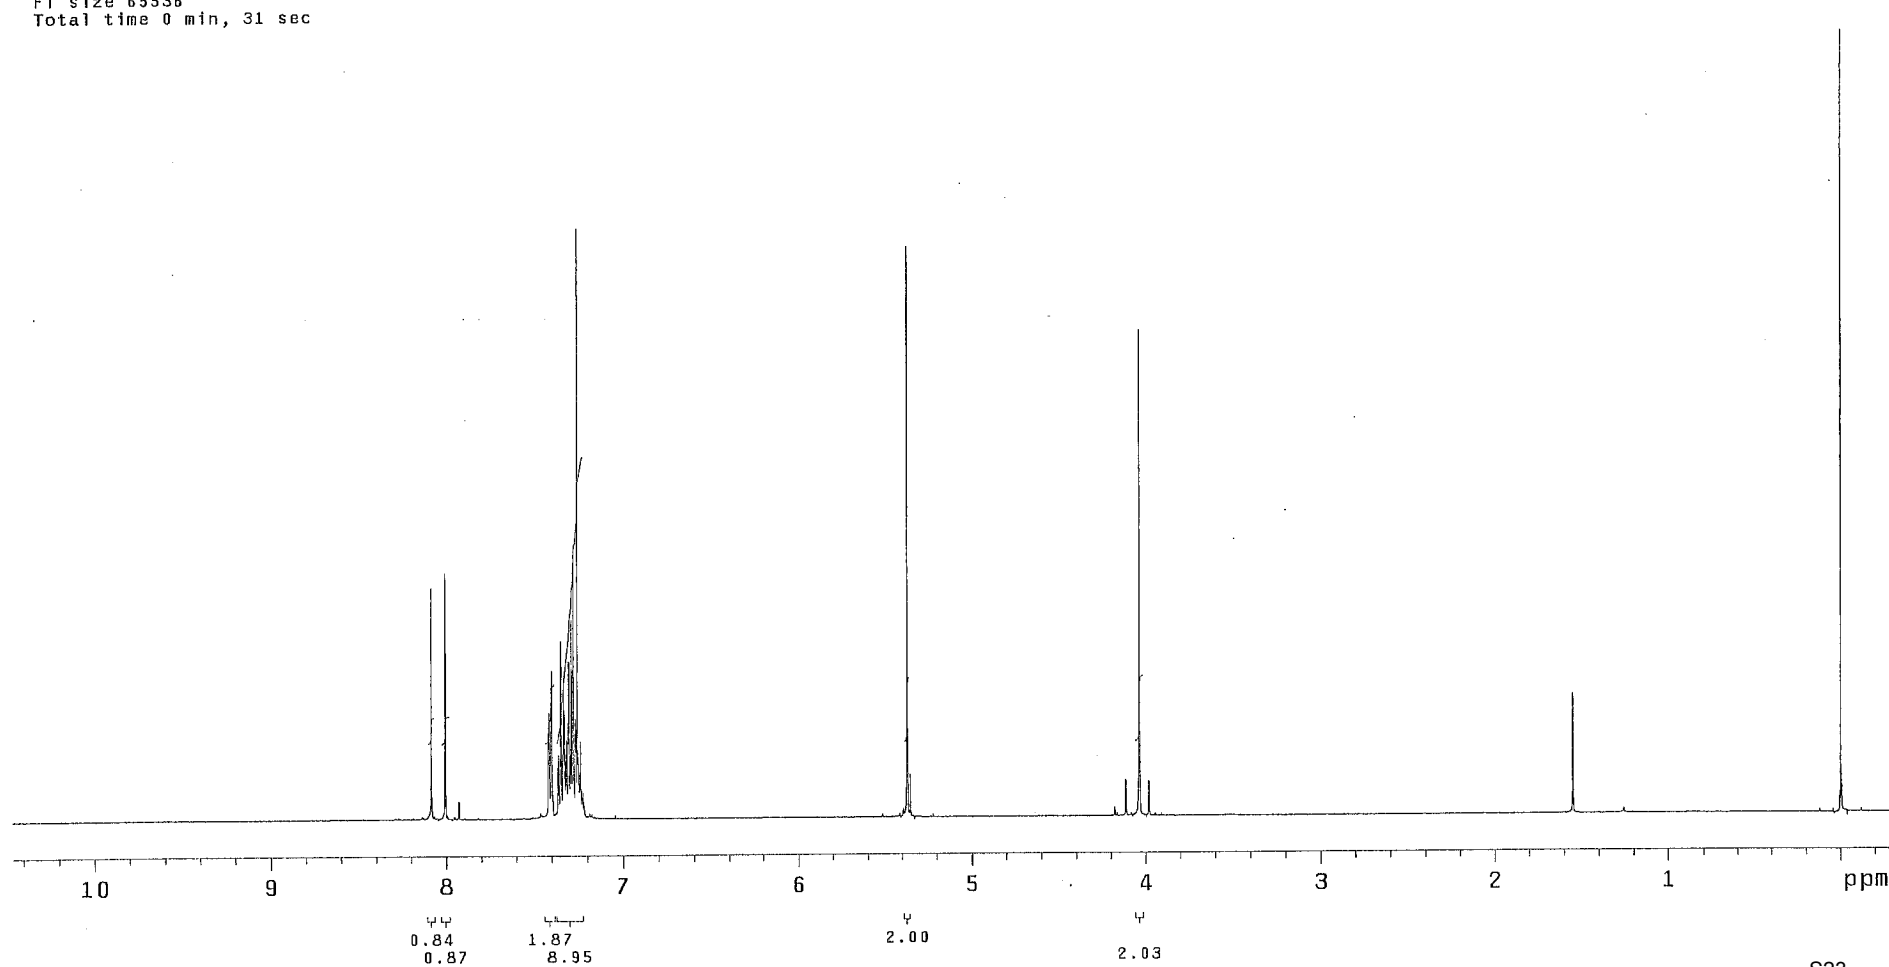



613

Sample: DBR-4-~~612~~  
Sample ID: s\_20120705\_05  
File: s\_20120705\_05/data/cdcl3\_01.fid

## 2-Benzyl-6-benzylozypyrazine (1i)

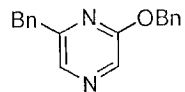

Pulse Sequence: s2pul  
Solvent: cdcl3  
Temp. 26.0 C / 299.1 K  
Operator: walkup  
File: cdcl3\_01  
VNMRS-500 "NMR500"

Relax. delay 1.000 sec  
Pulse 45.0 degrees  
Acq. time 1.300 sec  
Width 30487.8 Hz  
256 repetitions  
OBSERVE C13, 125.6576208 MHz  
DECOUPLE H1, 499.7341220 MHz  
Power 42 dB  
continuously on  
WALTZ-16 modulated  
DATA PROCESSING  
Line broadening 0.5 Hz  
FT size 131072  
Total time 9 min, 51 sec

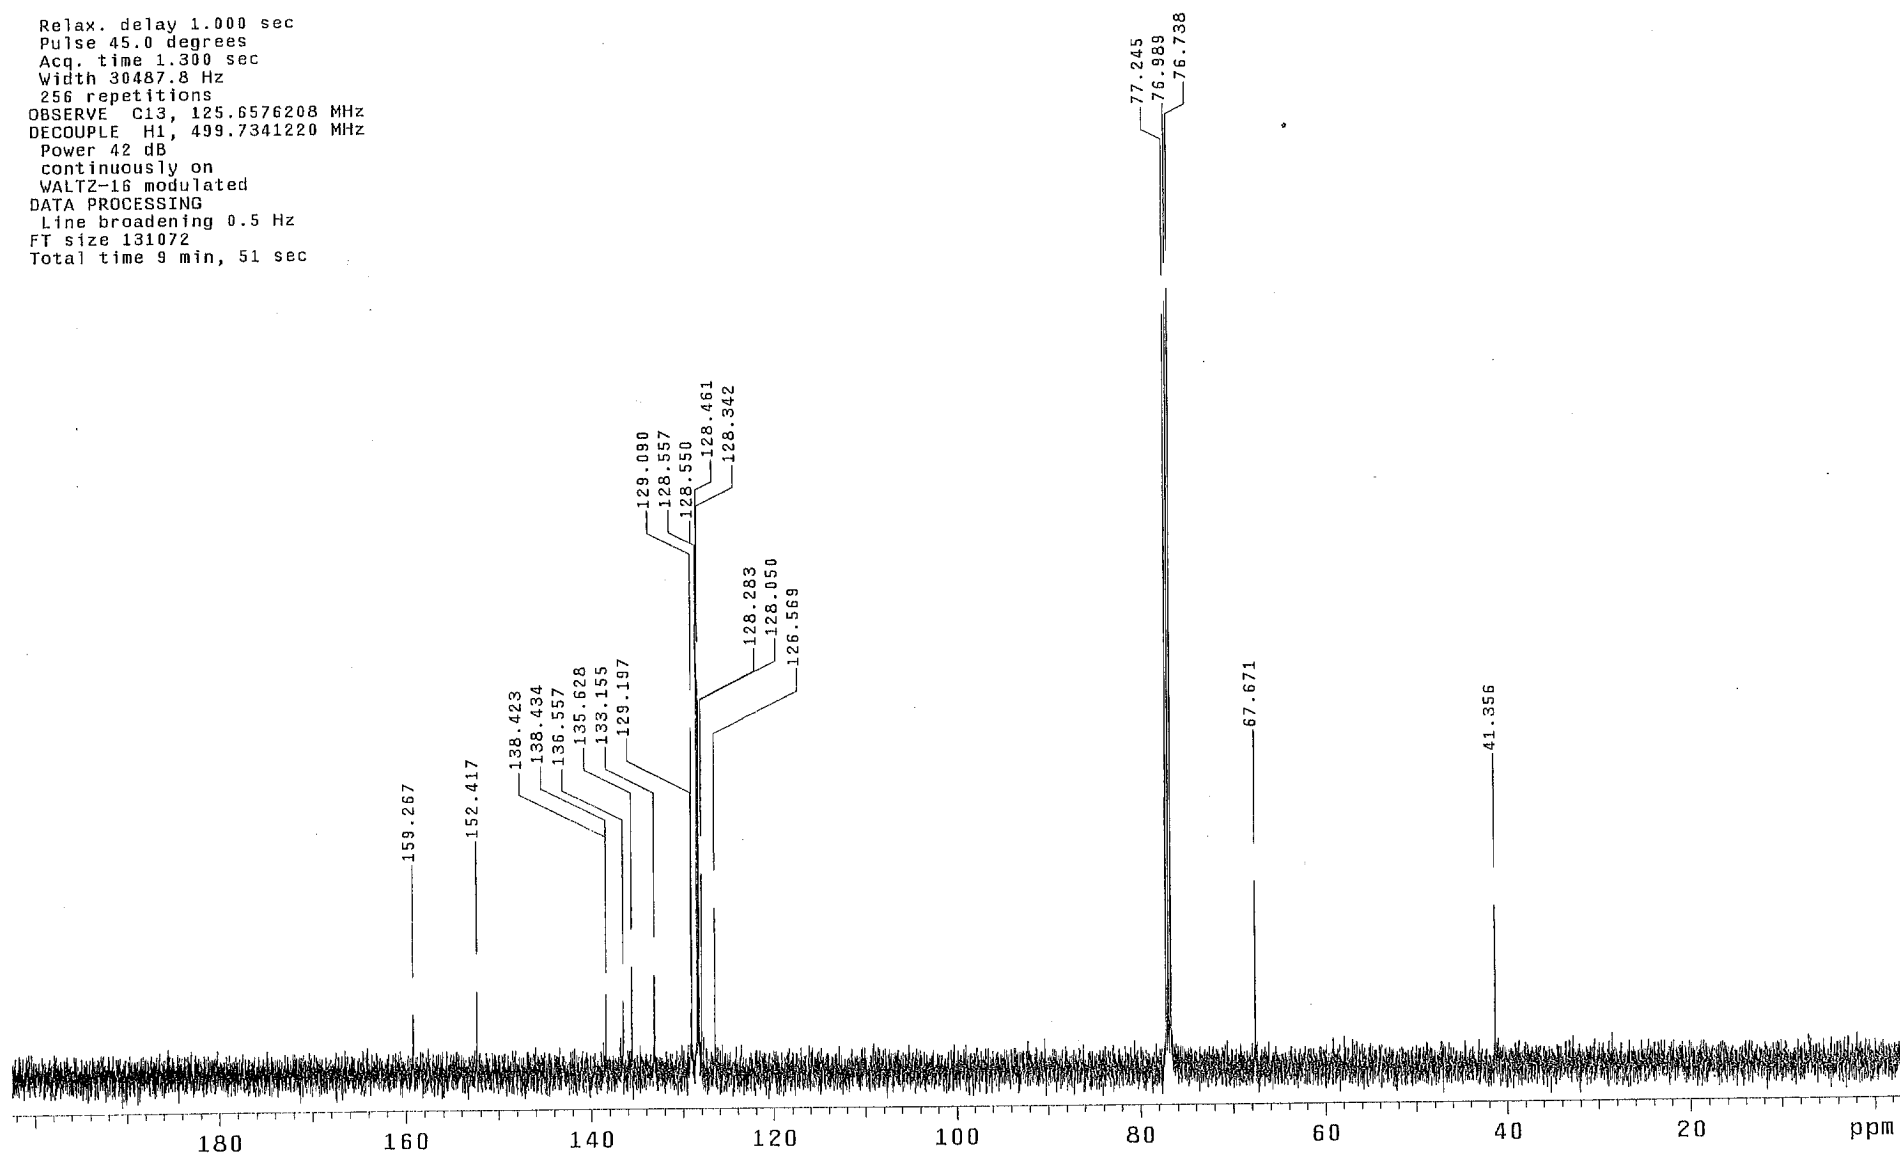

Sample: DBR-3-453  
Sample ID: s\_20101214\_08  
File: 00851.fid

Pulse Sequence: s2pul  
Solvent: cdc13  
Temp. 26.0 C / 299.1 K  
Operator: walkup  
File: 00851  
VNMR5-500 "NMR500"

## 2-Benzyloxy-6-phenylpyrazine (1j)

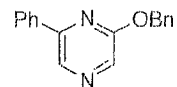

Relax. delay 1.000 sec  
Pulse 45.0 degrees  
Acq. time 2.049 sec  
Width 8012.8 Hz  
8 repetitions  
OBSERVE H1, 499.7316366 MHz  
DATA PROCESSING  
Resol. enhancement -0.0 Hz  
FT size 65536  
Total time 0 min, 31 sec

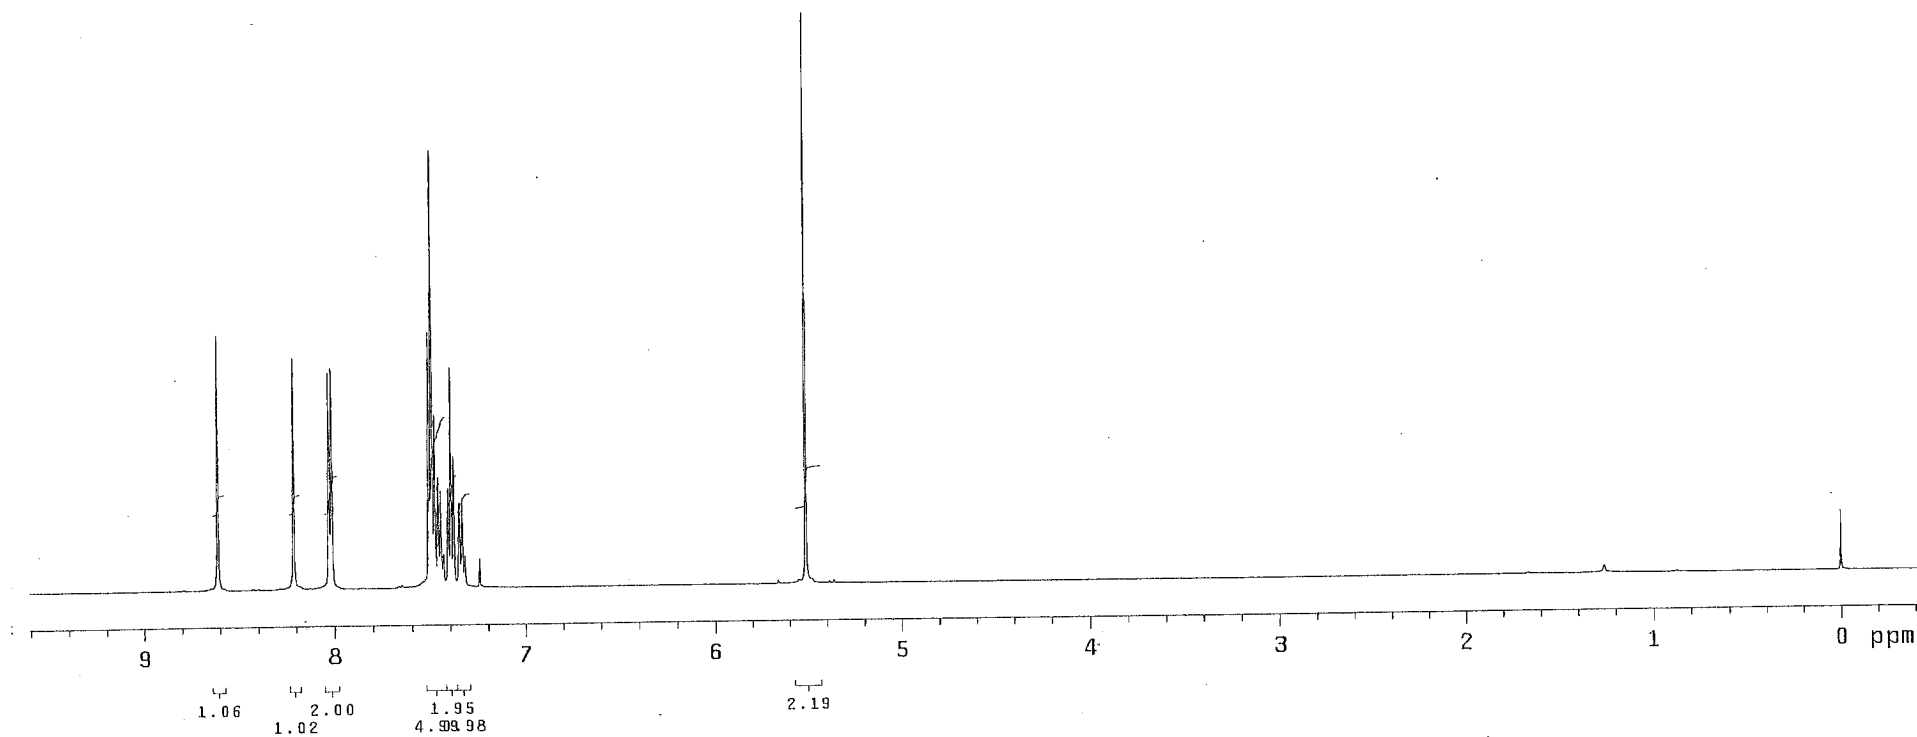

Sample: DBR-3-453  
Sample ID: s\_20101214\_07  
File: 00850.fid

## 2-Benzyloxy-6-phenylpyrazine (1j)

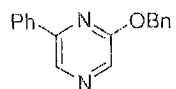

Pulse Sequence: s2pu1  
Solvent: cdcl3  
Temp. 26.0 C / 299.1 K  
Operator: walkup  
File: 00850  
VNMR5-500 "NMR500"

Relax. delay 1.000 sec  
Pulse 45.0 degrees  
Acq. time 1.300 sec  
Width 30487.8 Hz  
256 repetitions  
OBSERVE C13, 125.6576228 MHz  
DECOUPLE H1, 499.7341220 MHz  
Power 42 dB  
continuously on  
WALTZ-16 modulated  
DATA PROCESSING  
Line broadening 0.5 Hz  
FT size 131072  
Total time 9 min, 51 sec

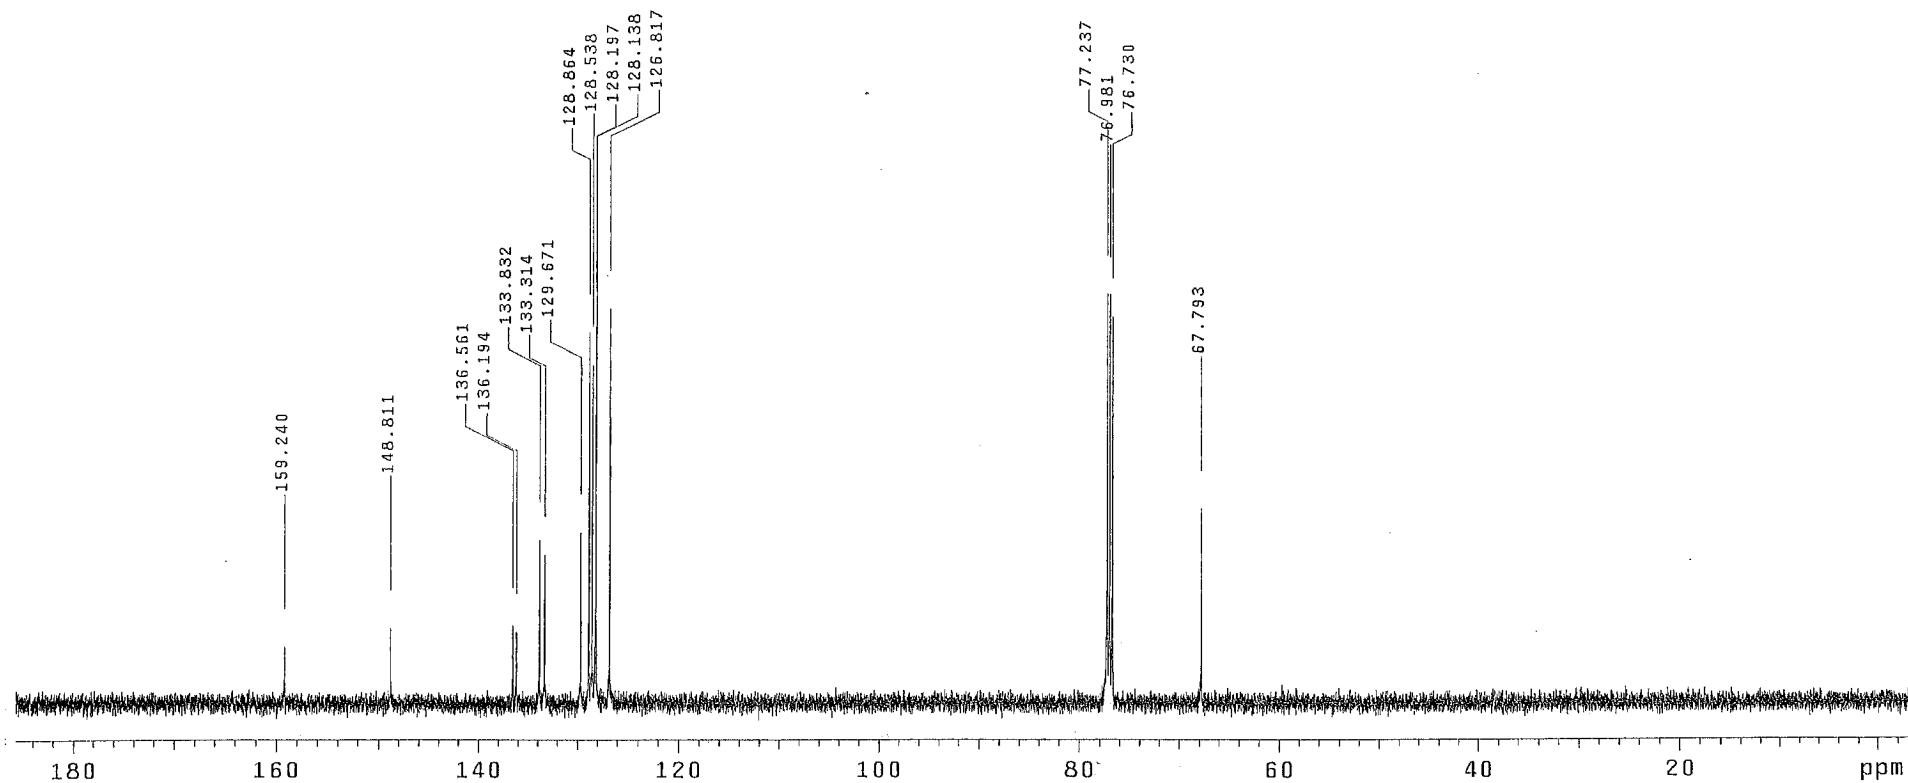

IPC 10 hr

Sample: VRS-7-57

Sample ID: s\_20140113\_01

File: s\_20140113\_01/data/cdc13\_01.fid

Pulse Sequence: s2pu1

Solvent: cdc13

Temp: 26.0 C / 299.1 K

Operator: walkup

File: cdc13\_01

VNMR5-500: "NMR500"

Relax. delay 1.000 sec

Pulse 45.0 degrees

Acq. time 2.049 sec

Width 8012.8 Hz

8 repetitions

OBSERVE H1, 499.7316285 MHz

DATA PROCESSING

Resol. enhancement -0.0 Hz

FT size 65536

Total time 0 min, 31 sec

## Benzyl 6-chloropyrazine-2-carboxylate

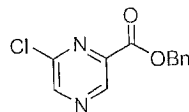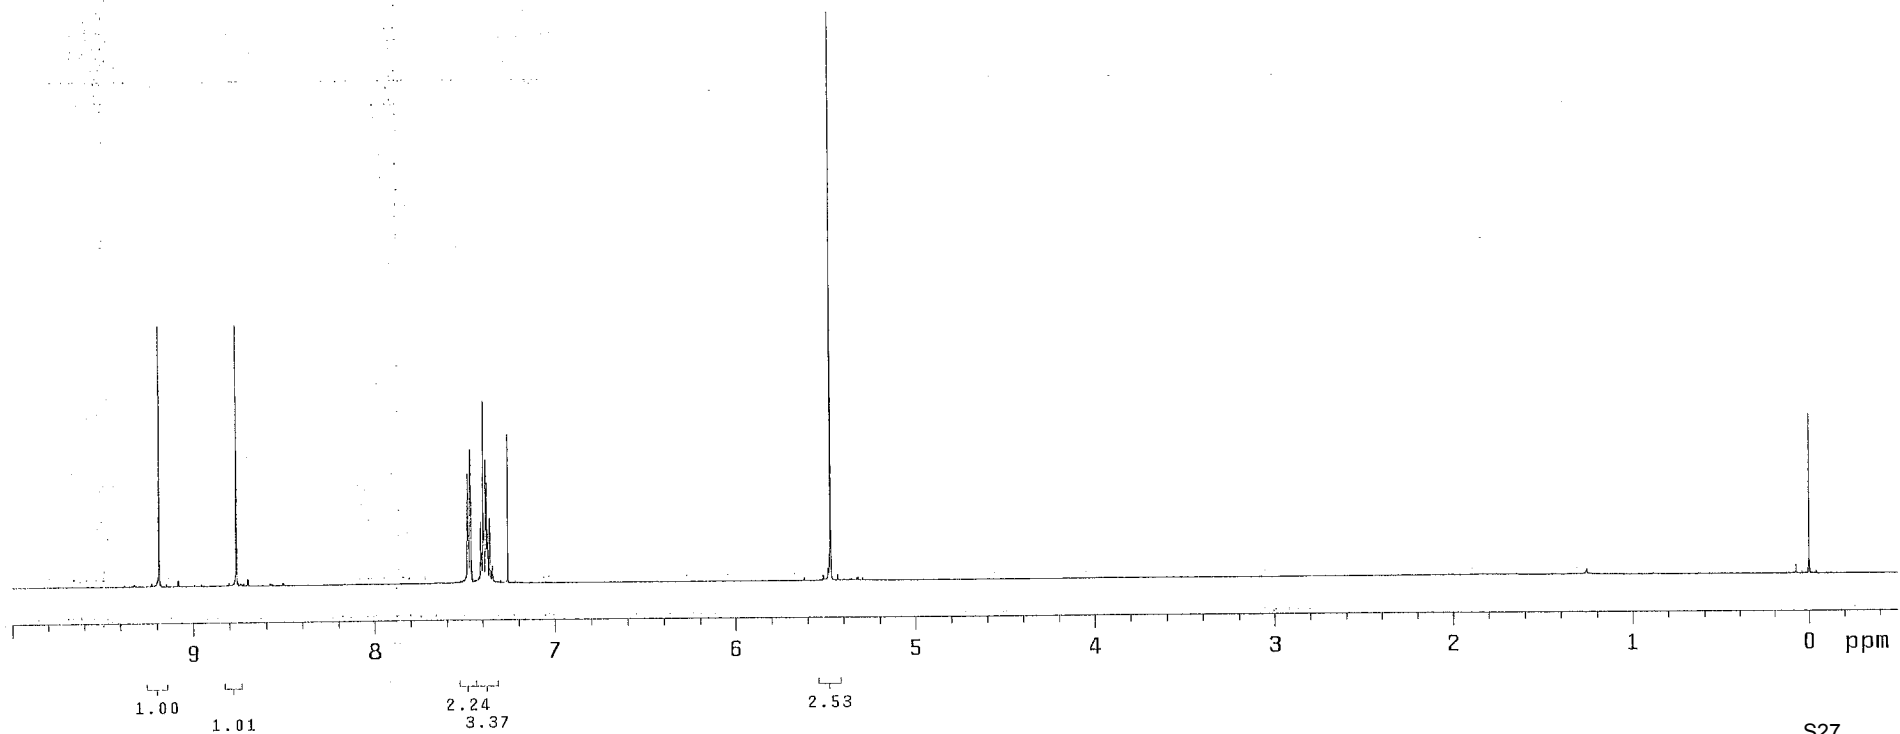

2-CBZ-6-chloropyrazine

Sample: VRS-7-52  
Sample ID: s\_20140113\_02  
File: s\_20140113\_02/data/cdcl3\_01.fid

Pulse Sequence: s2pul

Solvent: cdcl3  
Temp. 26.0 C / 299.1 K  
Operator: walkup  
File: cdcl3\_01  
VNMRS-500 "NMR500"

Relax. delay 1.000 sec  
Pulse 45.0 degrees  
Acq. time 1.300 sec  
Width 30487.8 Hz  
256 repetitions  
OBSERVE C13, 125.6576166 MHz  
DECOUPLE H1, 499.7341220 MHz  
Power 42 dB  
continuously on  
WALTZ-16 modulated  
DATA PROCESSING  
Line broadening 0.5 Hz  
FT size 131072  
Total time 9 min, 51 sec

# Benzyl 6-chloropyrazine-2-carboxylate

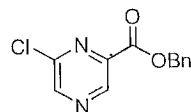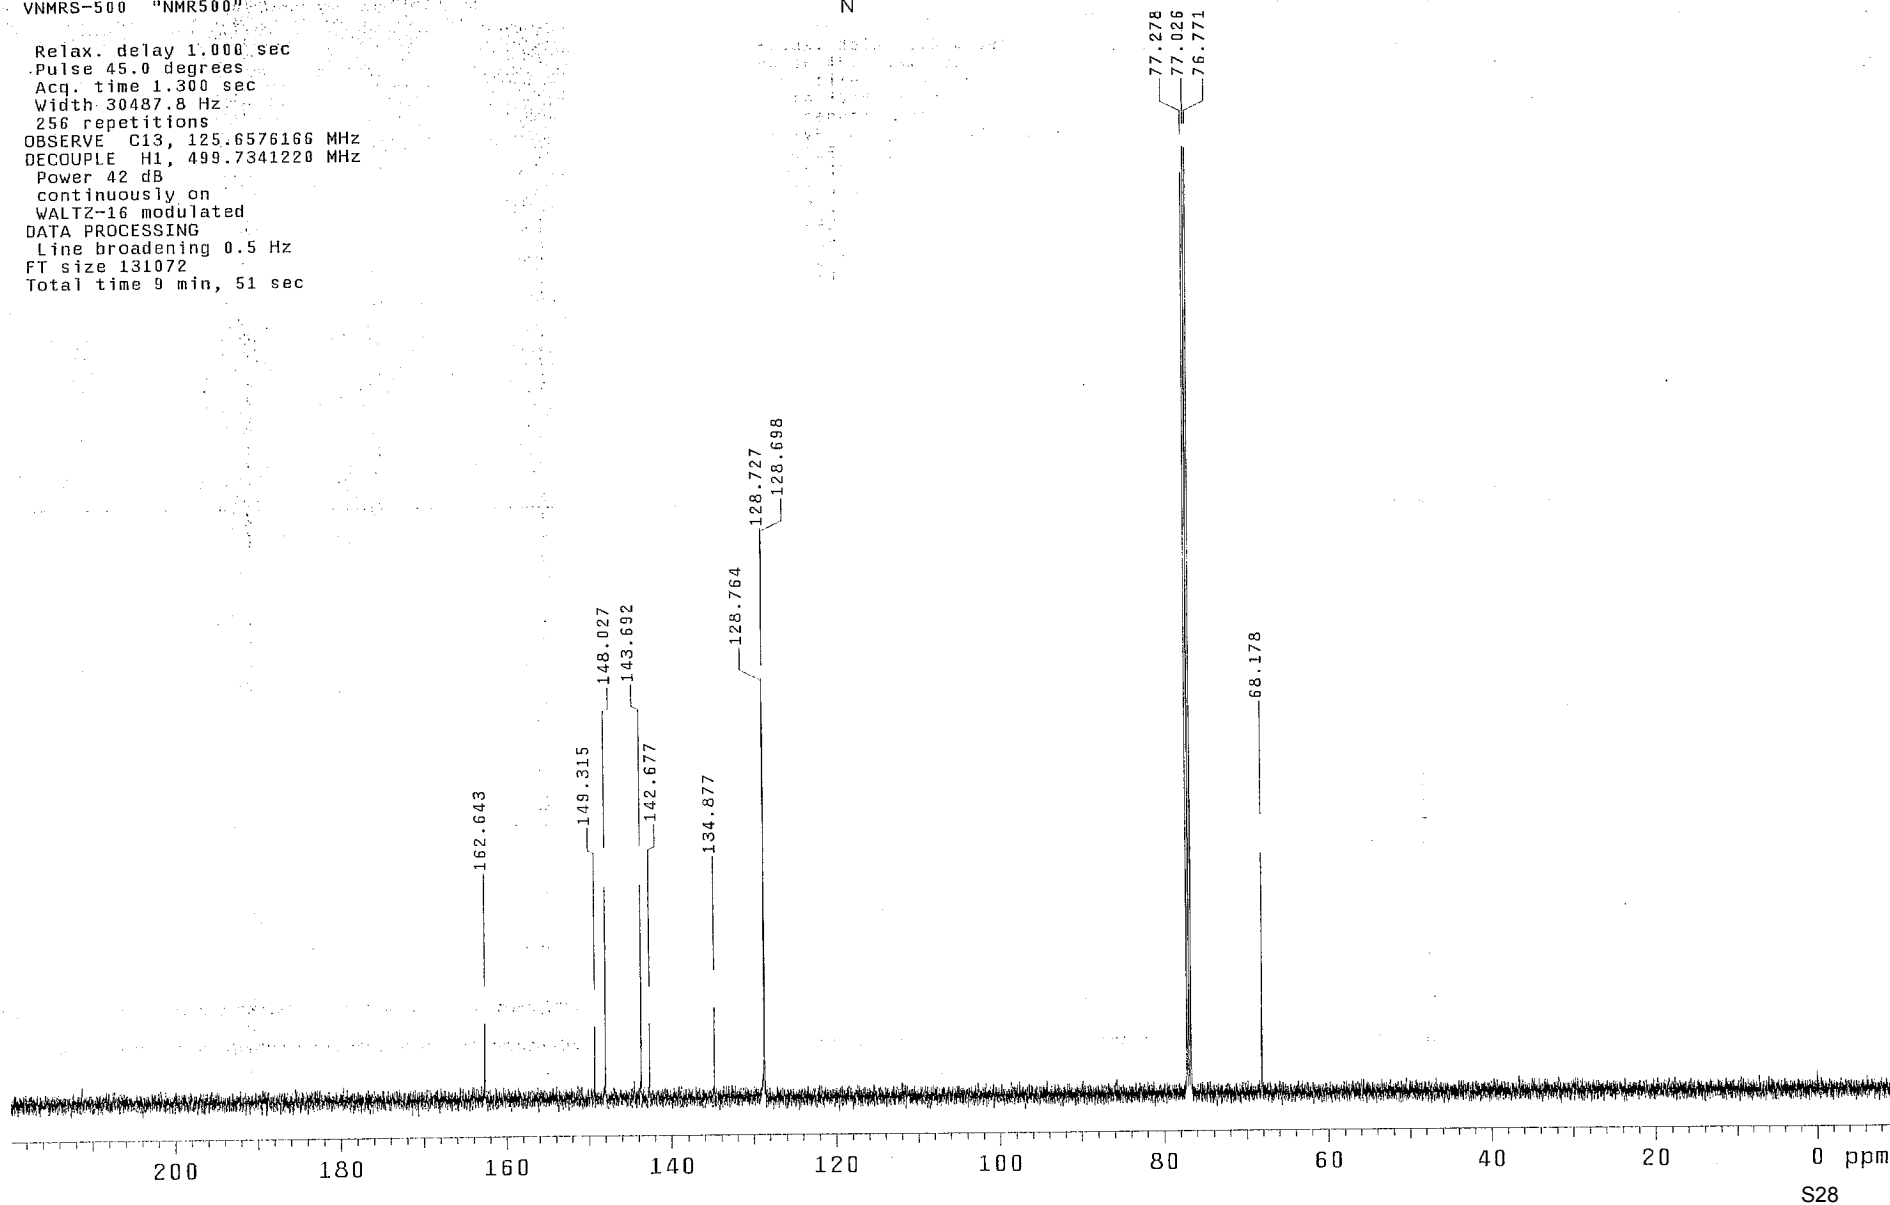

Band from ISCO

Sample: VRS-7-54  
Sample ID: s\_20140815\_02  
File: s\_20140815\_02/data/cdc1

Pulse Sequence: s2pul

Solvent: cdcl3  
Temp. 26.0 C / 299.1 K  
Operator: walkup  
File: cdcl3\_01  
VNMR5-500 "NMR500"

Relax. delay 1.000 sec  
Pulse 45.0 degrees  
Acq. time 2.049 sec  
Width 8012.8 Hz  
8 repetitions  
OBSERVE H1, 499.7316363 MHz  
DATA PROCESSING  
Resol. enhancement -0.0 Hz  
FT size 65536  
Total time 0 min, 31 sec

# Benzyl 6-(benzyloxy)pyrazine-2-carboxylate (1k)

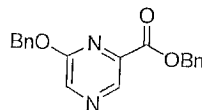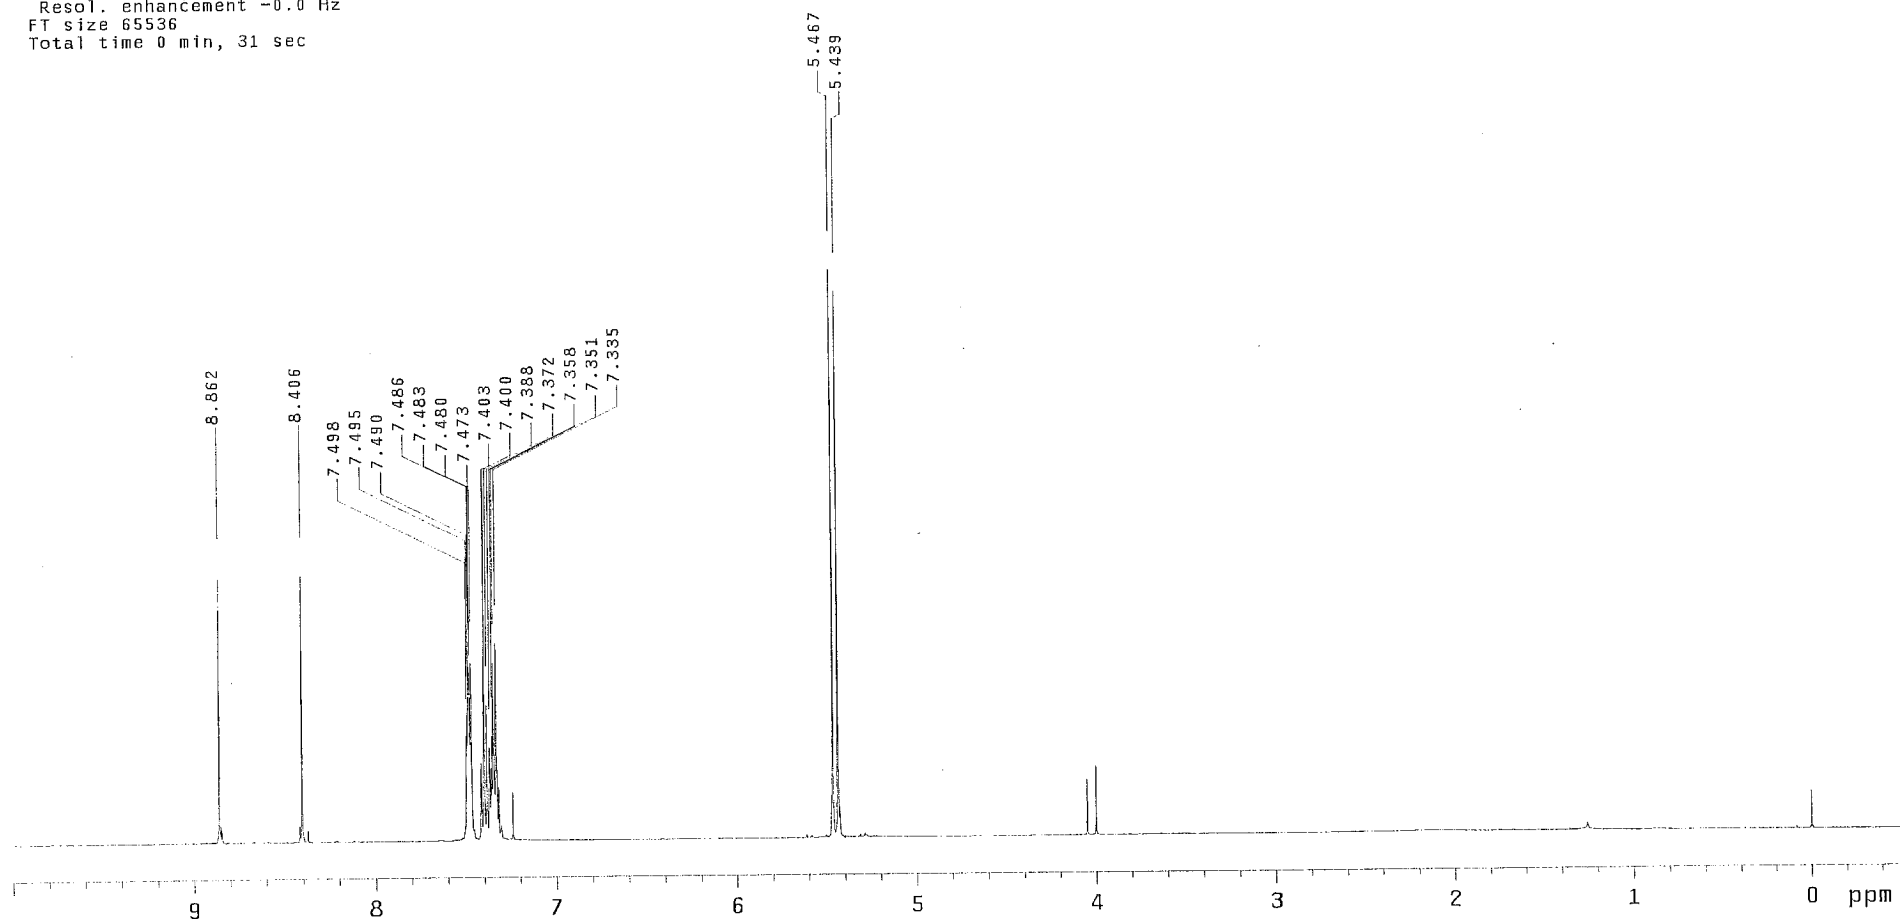

Purified

Sample: VRS-7-54  
Sample ID: s\_20140815\_03  
File: s\_20140815\_03/data/cdcl3\_

Pulse Sequence: s2pul  
Solvent: cdcl3  
Temp. 26.0 C / 299.1 K  
Operator: walkup  
File: cdcl3\_01  
VNMRS-500 "NMR500"

Relax. delay 1.000 sec  
Pulse 45.0 degrees  
Acq. time 1.300 sec  
Width 30487.8 Hz  
256 repetitions  
OBSERVE C13, 125.6576260 MHz  
DECOUPLE H1, 499.7341220 MHz  
Power 41 dB  
continuously on  
WALTZ-16 modulated  
DATA PROCESSING  
Line broadening 0.5 Hz  
FT size 131072  
Total time 9 min, 51 sec

# Benzyl 6-(benzyloxy)pyrazine-2-carboxylate (1k)

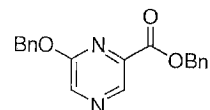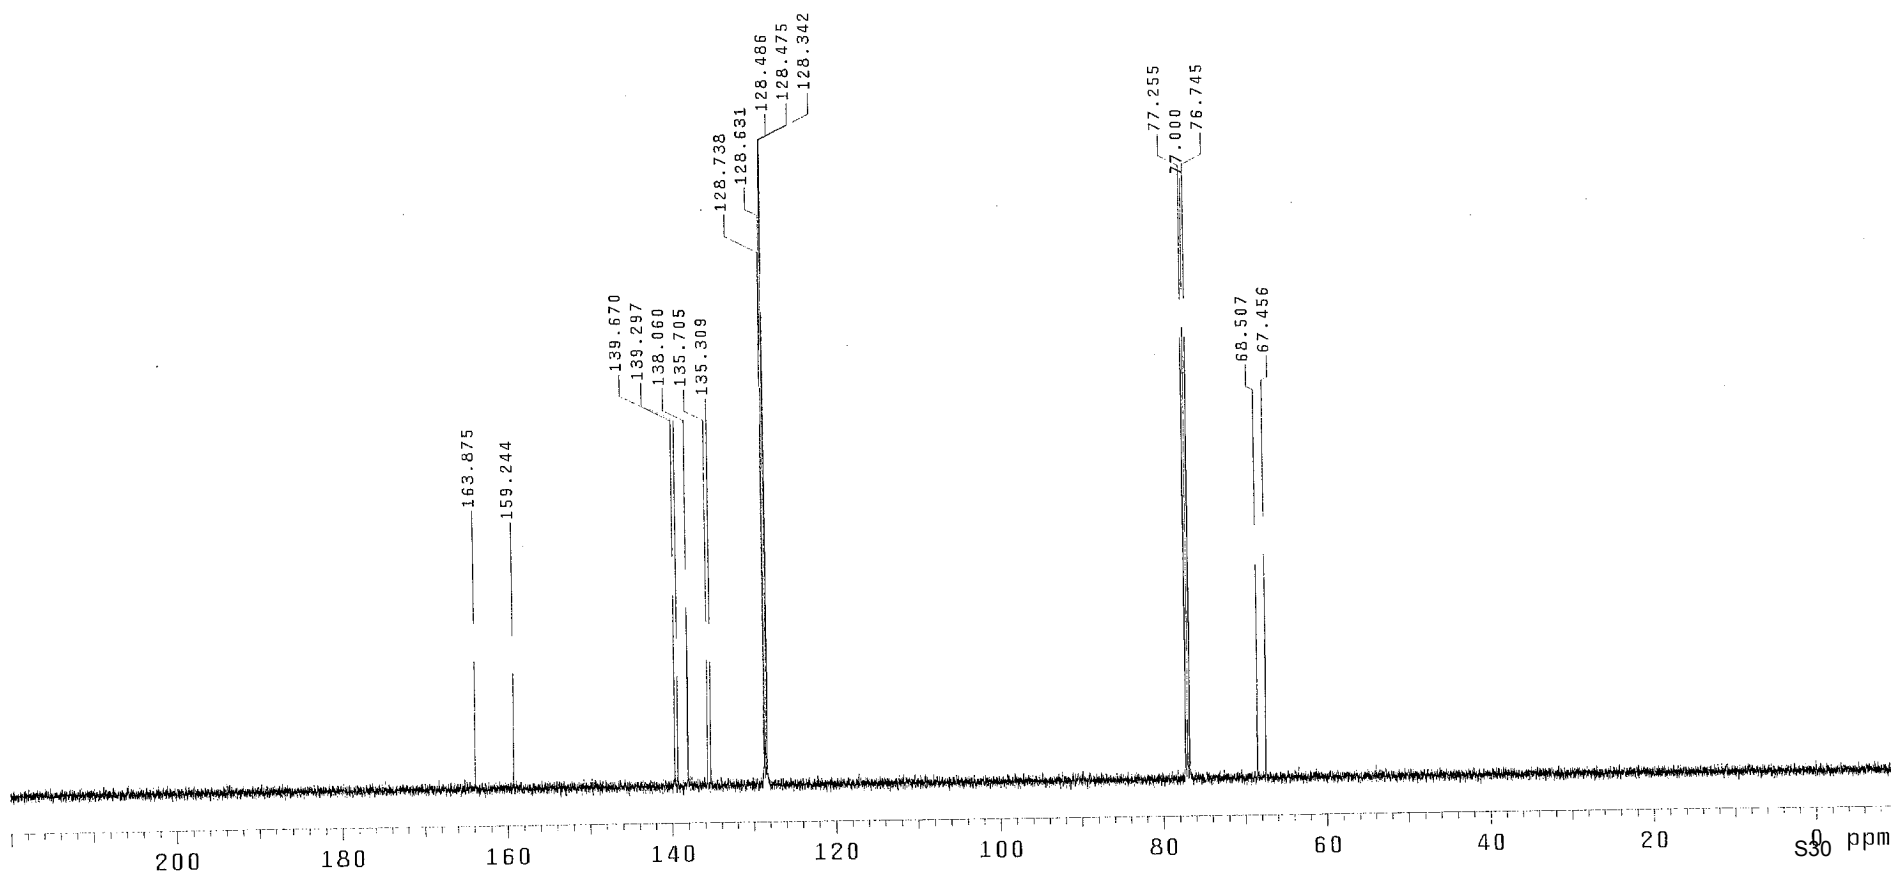

Purified

Sample: WH-1-4  
Sample ID: s\_20120611\_08  
File: s\_20120611\_08/data/cdc13\_01.fid

# 1-Phenoxycarbonyl-2-phenyl-3-methoxy-1,2-dihydropyrazine (3a)

Pulse Sequence: s2pu1  
Solvent: cdc13  
Temp. 26.0 C / 299.1 K  
Operator: walkup  
File: cdc13\_01  
VNMRS-500 "NMR500"

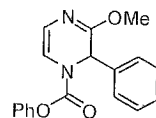

Relax. delay 1.000 sec  
Pulse 45.0 degrees  
Acq. time 2.049 sec  
Width 8012.8 Hz  
8 repetitions  
OBSERVE H1, 499.7316441 MHz  
DATA PROCESSING  
Resol. enhancement -0.0 Hz  
FT size 65536  
Total time 0 min, 31 sec

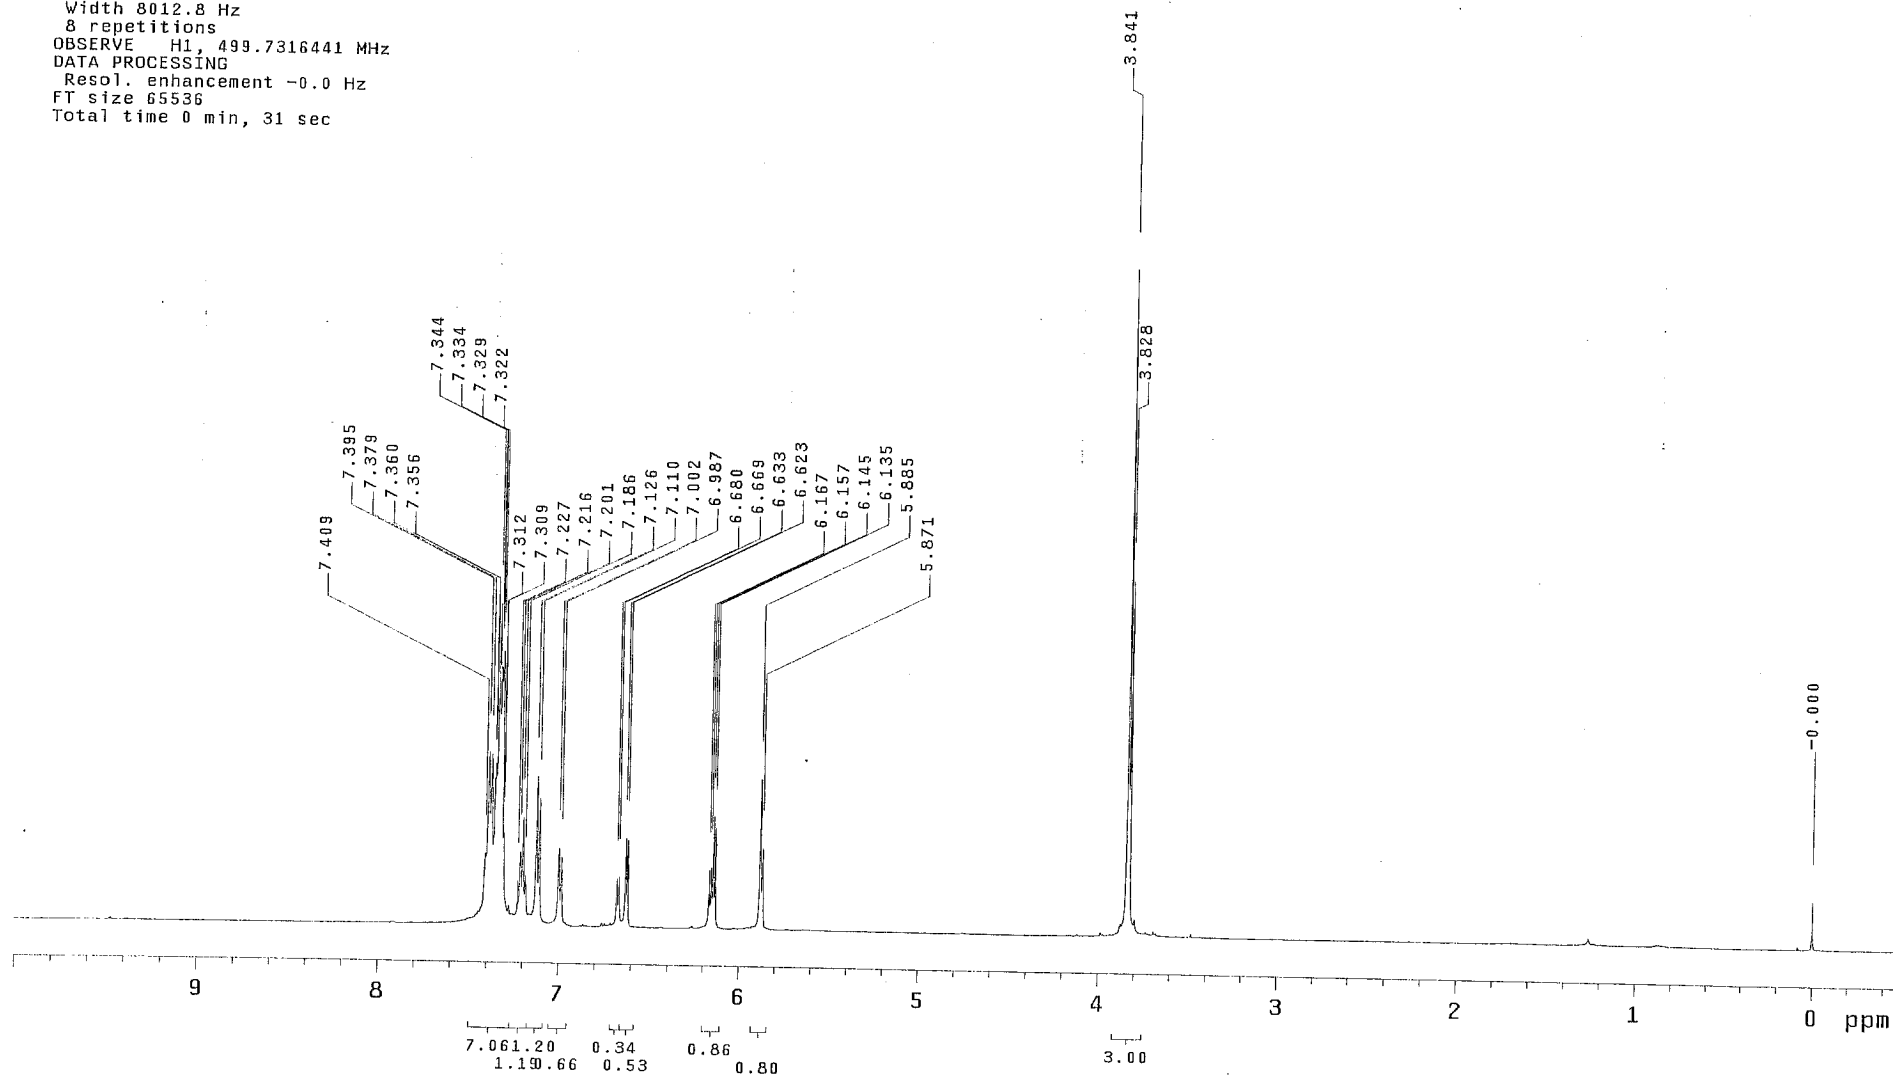



Purified

Sample: WH-1-4  
File: exp

Pulse Sequence: s2pul

Solvent: cdc13  
Temp. 26.0 C / 299.1 K  
Operator: walkup  
VNMR5-500 "NMR500"

Relax. delay 1.000 sec  
Pulse 45.0 degrees  
Acq. time 1.300 sec  
Width 30487.8 Hz  
1280 repetitions  
OBSERVE C13, 125.6576247 MHz  
DECOUPLE H1, 499.7341220 MHz  
Power 42 dB  
continuously on  
WALTZ-16 modulated  
DATA PROCESSING  
Line broadening 0.5 Hz  
FT size 131072  
Total time 16 hr, 25 min, 21 sec

# 1-Phenoxycarbonyl-2-phenyl-3-methoxy-1,2-dihydropyrazine (3a)

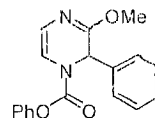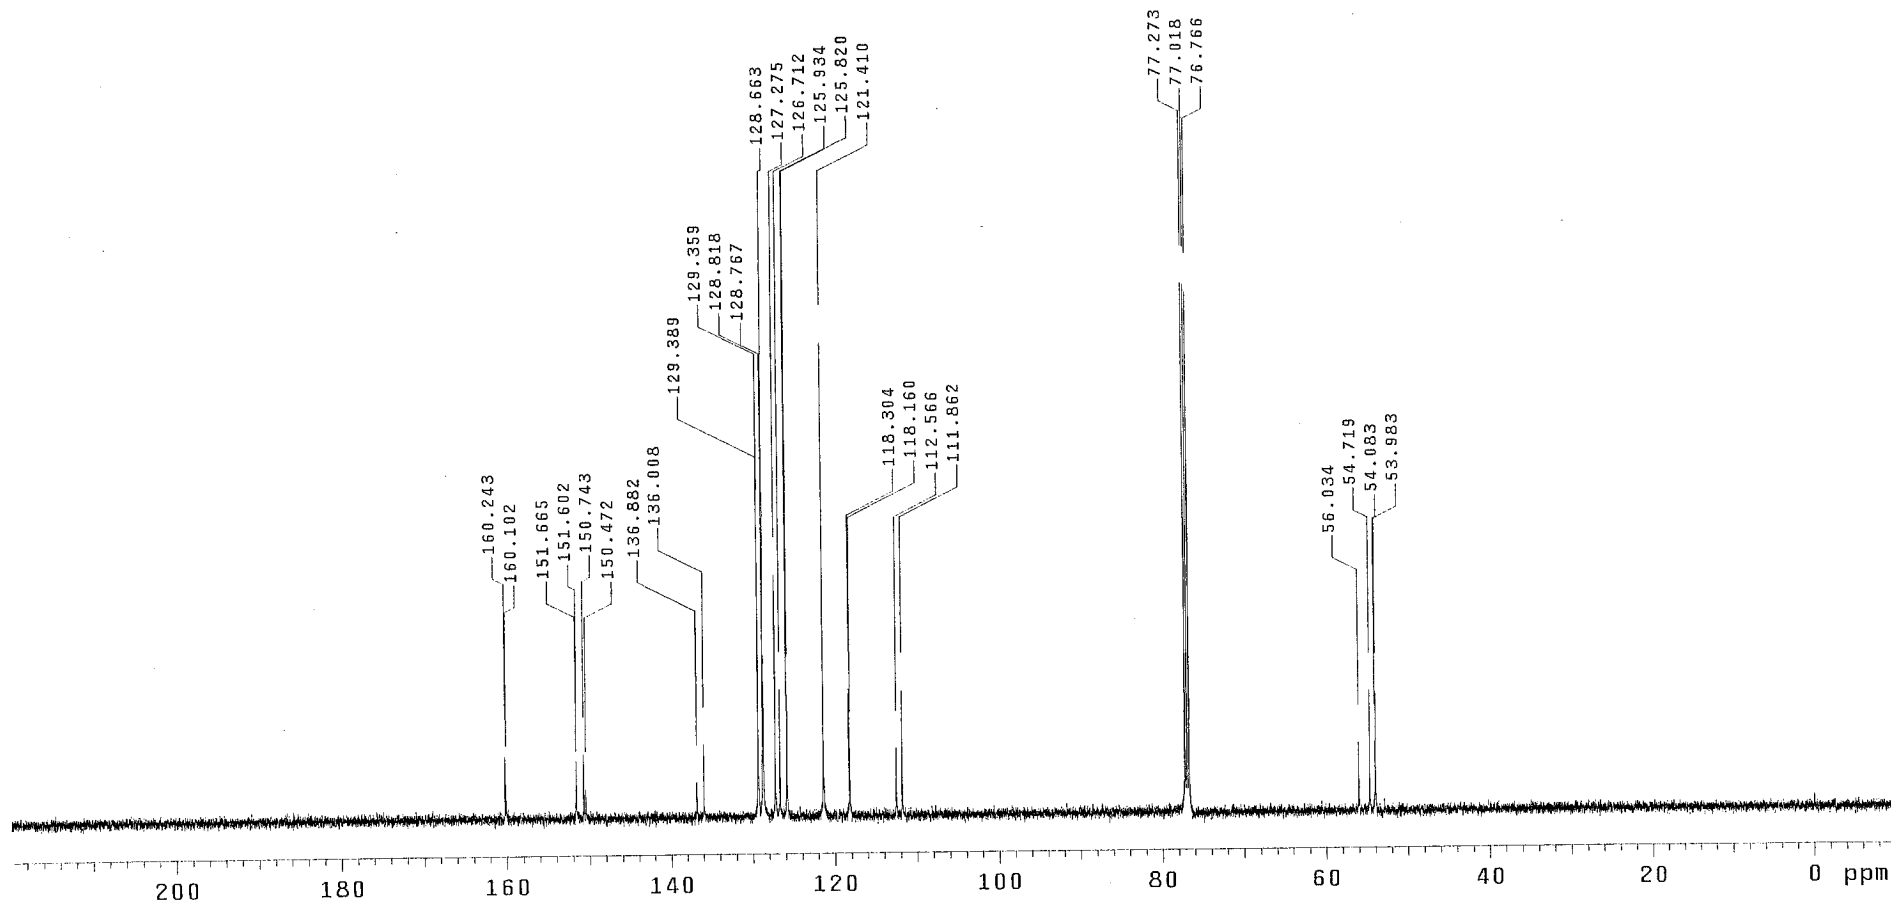

1-Phenoxycarbonyl-2-methyl-3-methoxy-1,2-dihydropyrazine

Sample: WH-1-21  
Sample ID: s\_20110703\_04  
File: /home/walkup/vnmrsys/d.

# 1-Phenoxycarbonyl-2-methyl-3-methoxy-1,2-dihydropyrazine (3b)

Pulse Sequence: s2pul  
Solvent: cdcl3  
Temp. 26.0 C / 299.1 K  
Operator: walkup  
File: cdcl3\_01  
VNMR5-500: "NMR500"

Relax. delay 1.000 sec  
Pulse 45.0 degrees  
Acq. time 2.049 sec  
Width 8012.8 Hz  
8 repetitions  
OBSERVE H1, 499.7316304 MHz  
DATA PROCESSING  
Resol. enhancement -0.0 Hz  
FT size 65536  
Total time 0 min, 31 sec

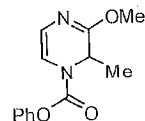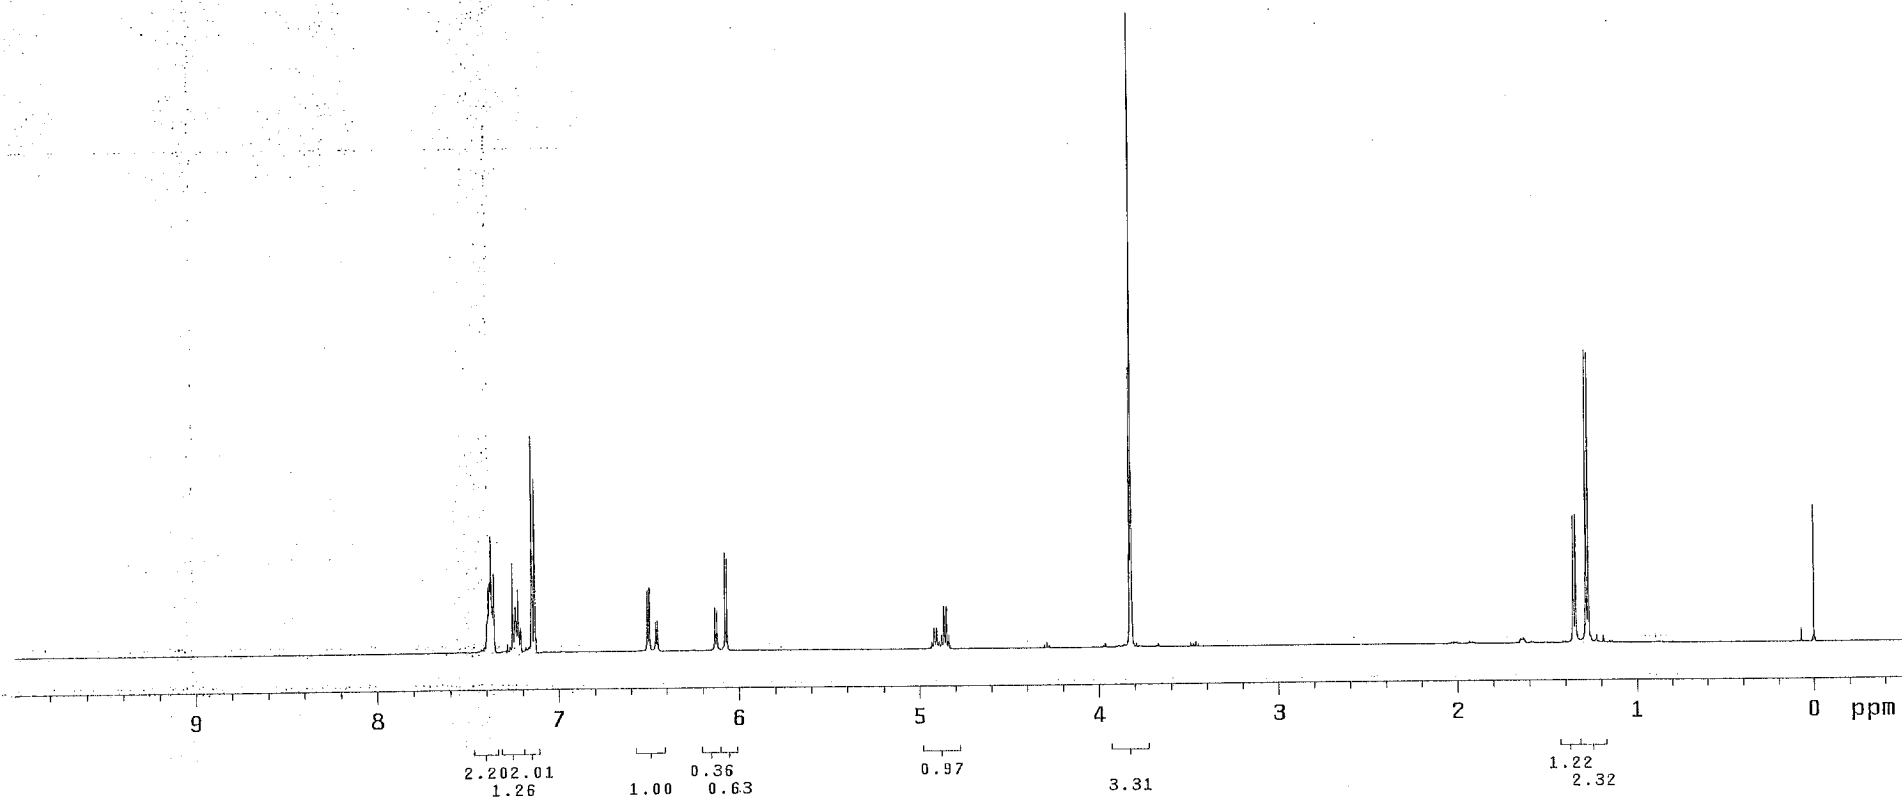

1-Phenoxycarbonyl-2-methyl-3-methoxy-1,2-dihydropyrazine

Sample: WH-1-21

Sample ID: s\_20110703\_03

File: /home/walkup/vnmrSYS/data/

Pulse Sequence: s2pu1

Solvent: cdcl3

Temp. 26.0 C / 299.1 K

Operator: walkup

File: cdcl3\_01

VNMRS-500: "NMR500"

Relax. delay 1.000 sec

Pulse 45.0 degrees

Acq. time 1.300 sec

Width 30487.8 Hz

256 repetitions

OBSERVE C13, 125.6576325 MHz

DECOUPLE H1, 499.7341220 MHz

Power 42 dB

continuously on

WALTZ-16 modulated

DATA PROCESSING

Line broadening 0.5 Hz

FT size 131072

Total time 9 min, 51 sec

## 1-Phenoxycarbonyl-2-methyl-3-methoxy-1,2-dihydropyrazine (3b)

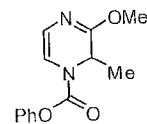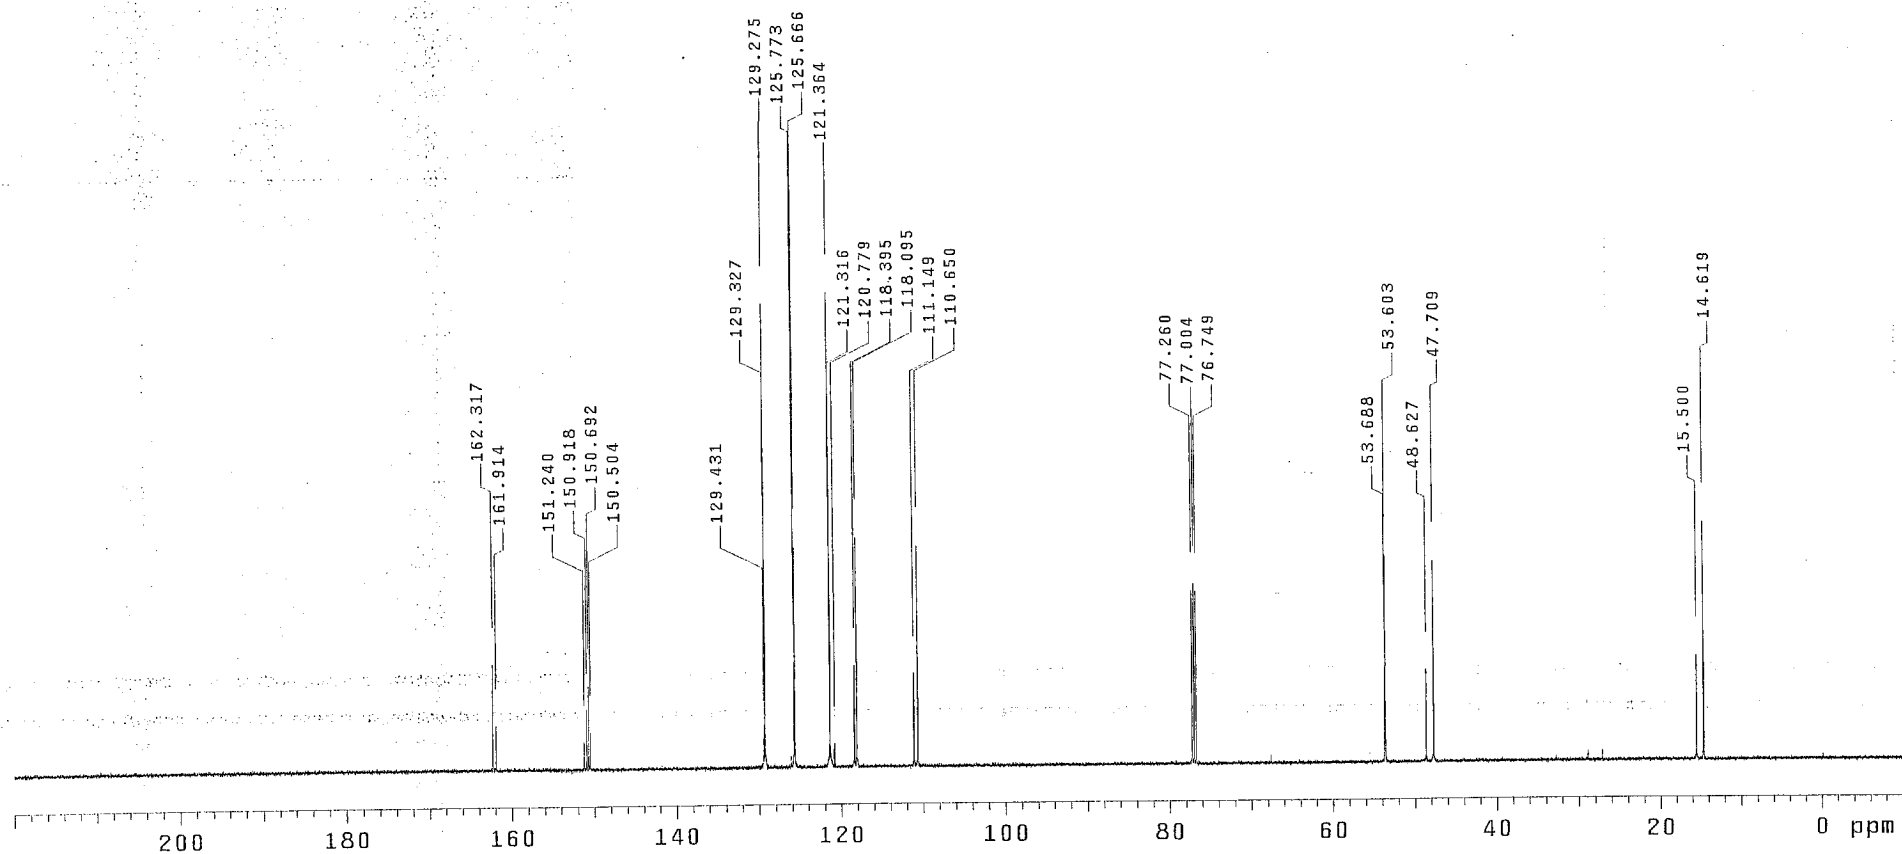

Purified (Reaction with Ethyl Grignard)

Sample: VRS-5-74B  
Sample ID: s\_20111122\_02  
File: /home/walkup/vnmrsys/data

Pulse Sequence: s2pul

Solvent: cdcl3  
Temp. 26.0 C / 299.1 K  
Operator: walkup  
File: cdcl3\_01  
VNMR5-500 "NMR500"

Relax. delay 1.000 sec  
Pulse 45.0 degrees  
Acq. time 2.049 sec  
Width 8012.8 Hz  
8 repetitions  
OBSERVE H1, 499.7316314 MHz  
DATA PROCESSING  
Resol. enhancement -0.0 Hz  
FT size 65536  
Total time 0 min, 31 sec

# 1-Phenoxycarbonyl-2-ethyl-3-methoxy-1,2-dihydropyrazine (3c)

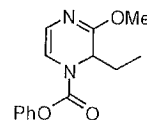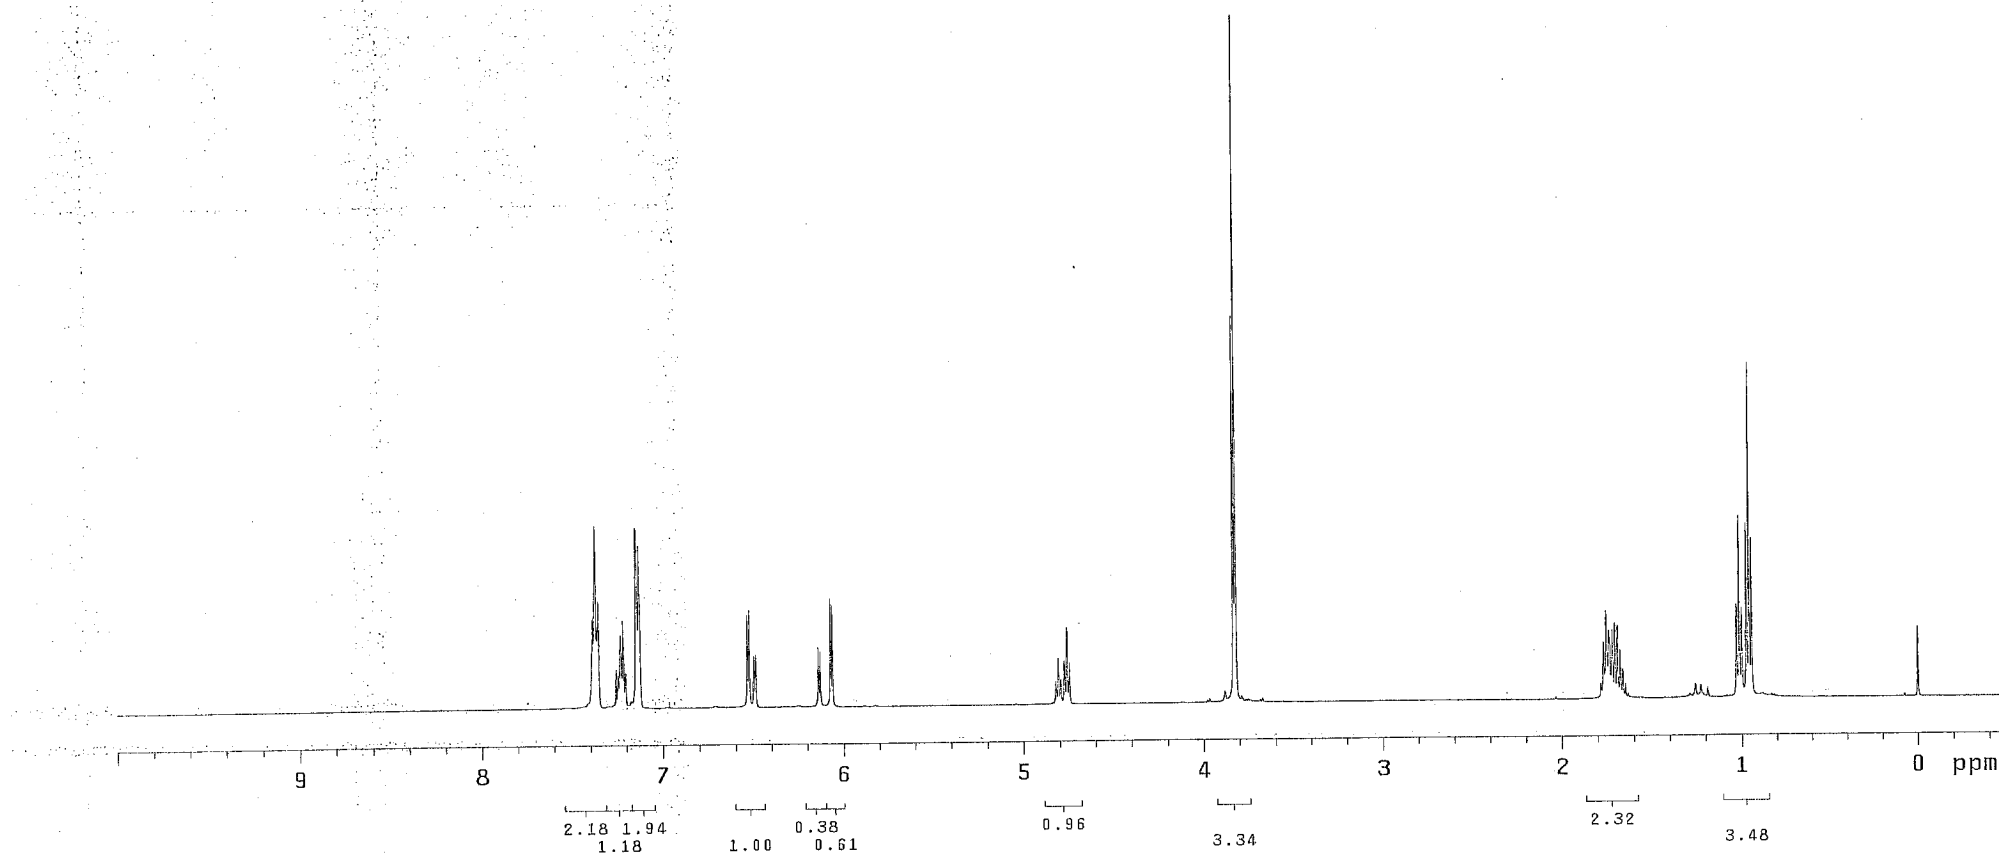

Purified (Reaction with Ethyl Grign)

Sample: VRS-5-74B  
Sample ID: s\_20111122\_03  
File: /home/walkup/vnmrsys/data/auti

Pulse Sequence: s2pul

Solvent: cdcl3  
Temp. 26.0 C / 299.1 K  
Operator: walkup  
File: cdcl3\_01  
VNMR5-500 "NMR500"

Relax. delay 1.000 sec  
Pulse 45.0 degrees  
Acq. time 1.300 sec  
Width 30487.8 Hz  
256 repetitions  
OBSERVE C13, 125.6576166 MHz  
DECOUPLE H1, 499.7341220 MHz  
Power 42 dB  
continuously on  
WALTZ-16 modulated  
DATA PROCESSING  
Line broadening 0.5 Hz  
FT size 131072  
Total time 9 min, 51 sec

# 1-Phenoxycarbonyl-2-ethyl-3-methoxy-1,2-dihydropyrazine (3c)

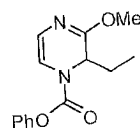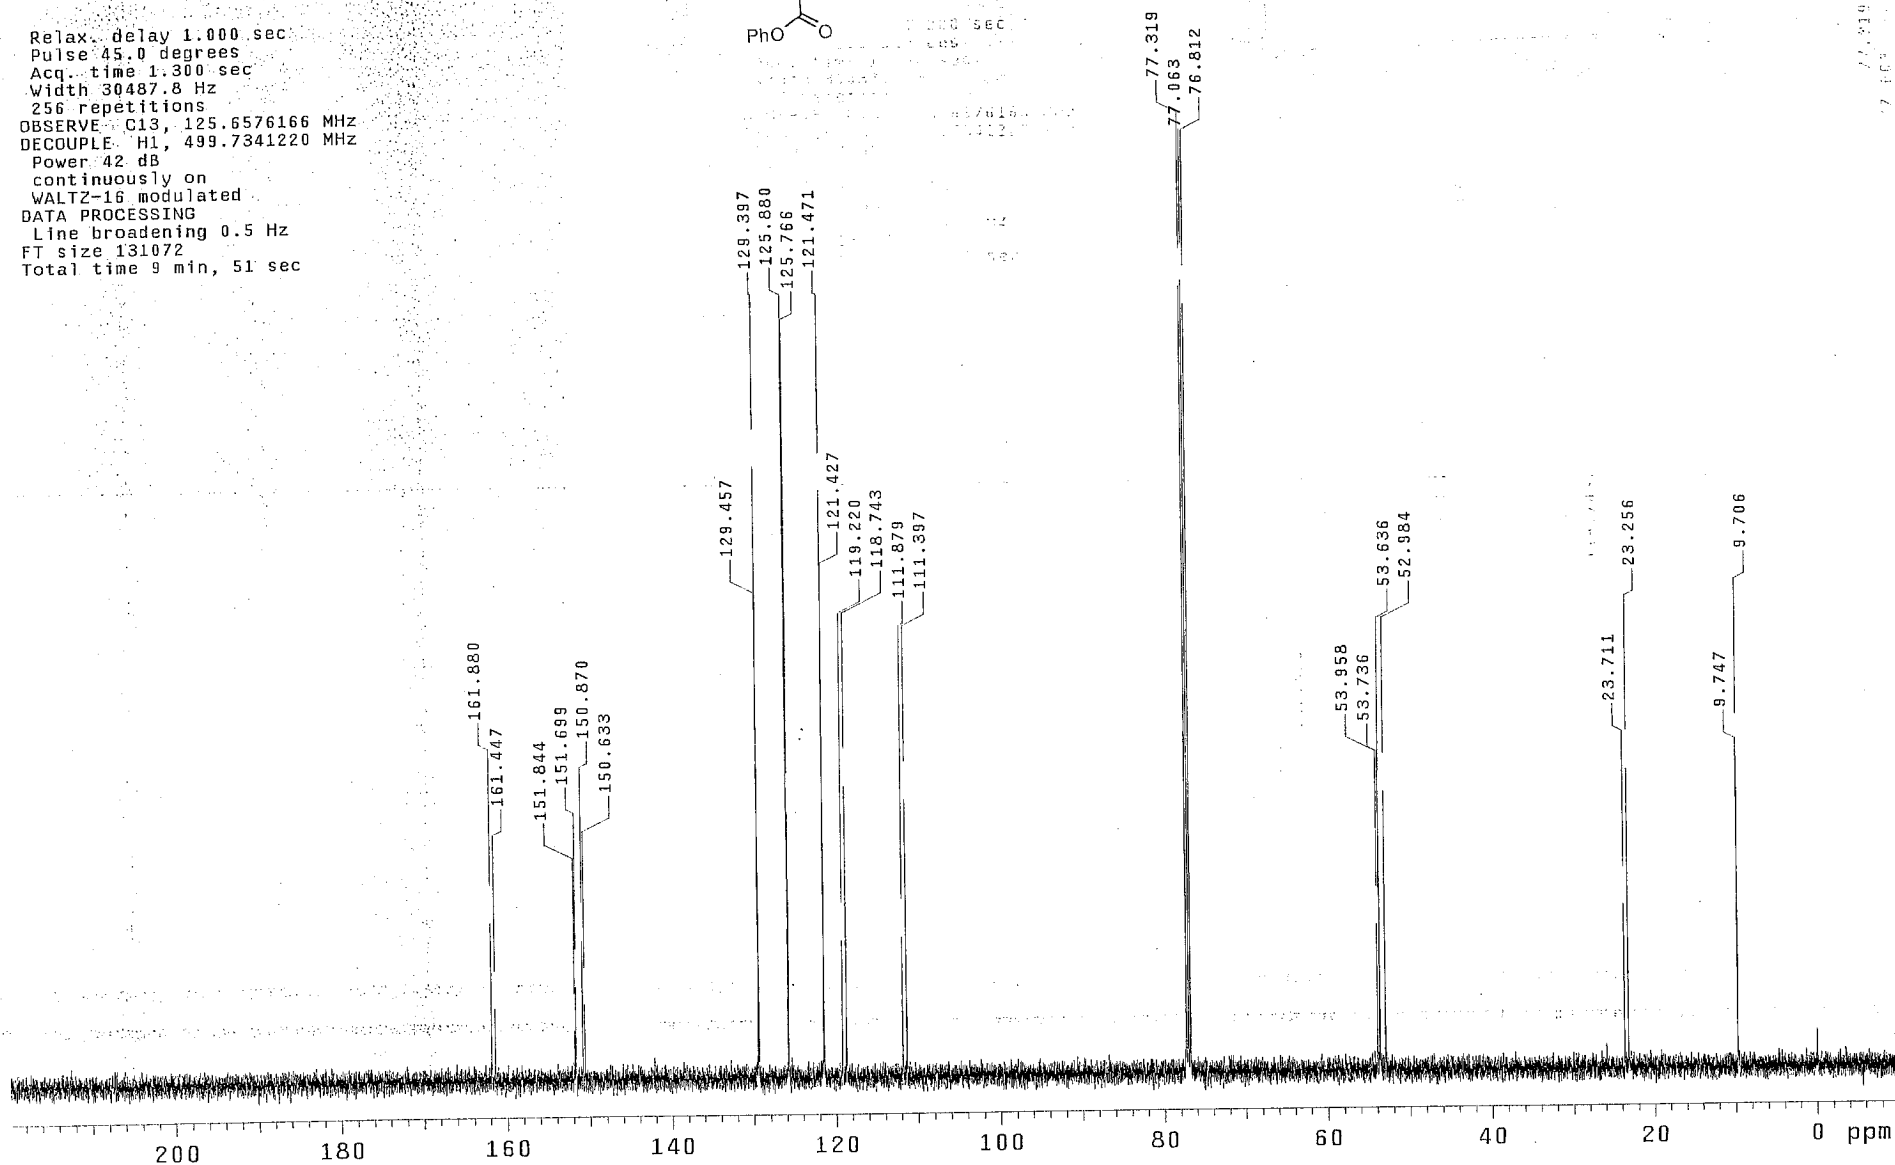

Fractions 17-25

Sample: YM-1-10

Sample ID: s\_20120907\_07

File: /home/walkup/vnmrsys/data

Pulse Sequence: s2pul

Solvent: cdcl3

Temp. 26.0 C / 299.1 K

Operator: walkup

File: cdcl3\_01

VNMR5-500 "NMR500"

Relax. delay 1.000 sec

Pulse 45.0 degrees

Acq. time 2.049 sec

Width 8012.8 Hz

8 repetitions

OBSERVE H1, 499.7316334 MHz

DATA PROCESSING

Resol. enhancement -0.0 Hz

FT size 65536

Total time 0 min, 31 sec

# 1-Phenoxycarbonyl-2-isopropyl-3-methoxy-1,2-dihydropyrazine (3d)

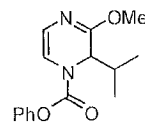

Acq. time 2.049 sec  
Width 8012.8 Hz  
Pulse 45.0 degrees  
Relax. delay 1.000 sec  
OBSERVE H1, 499.7316334 MHz  
DATA PROCESSING  
Resol. enhancement -0.0 Hz  
FT size 65536  
Total time 0 min, 31 sec

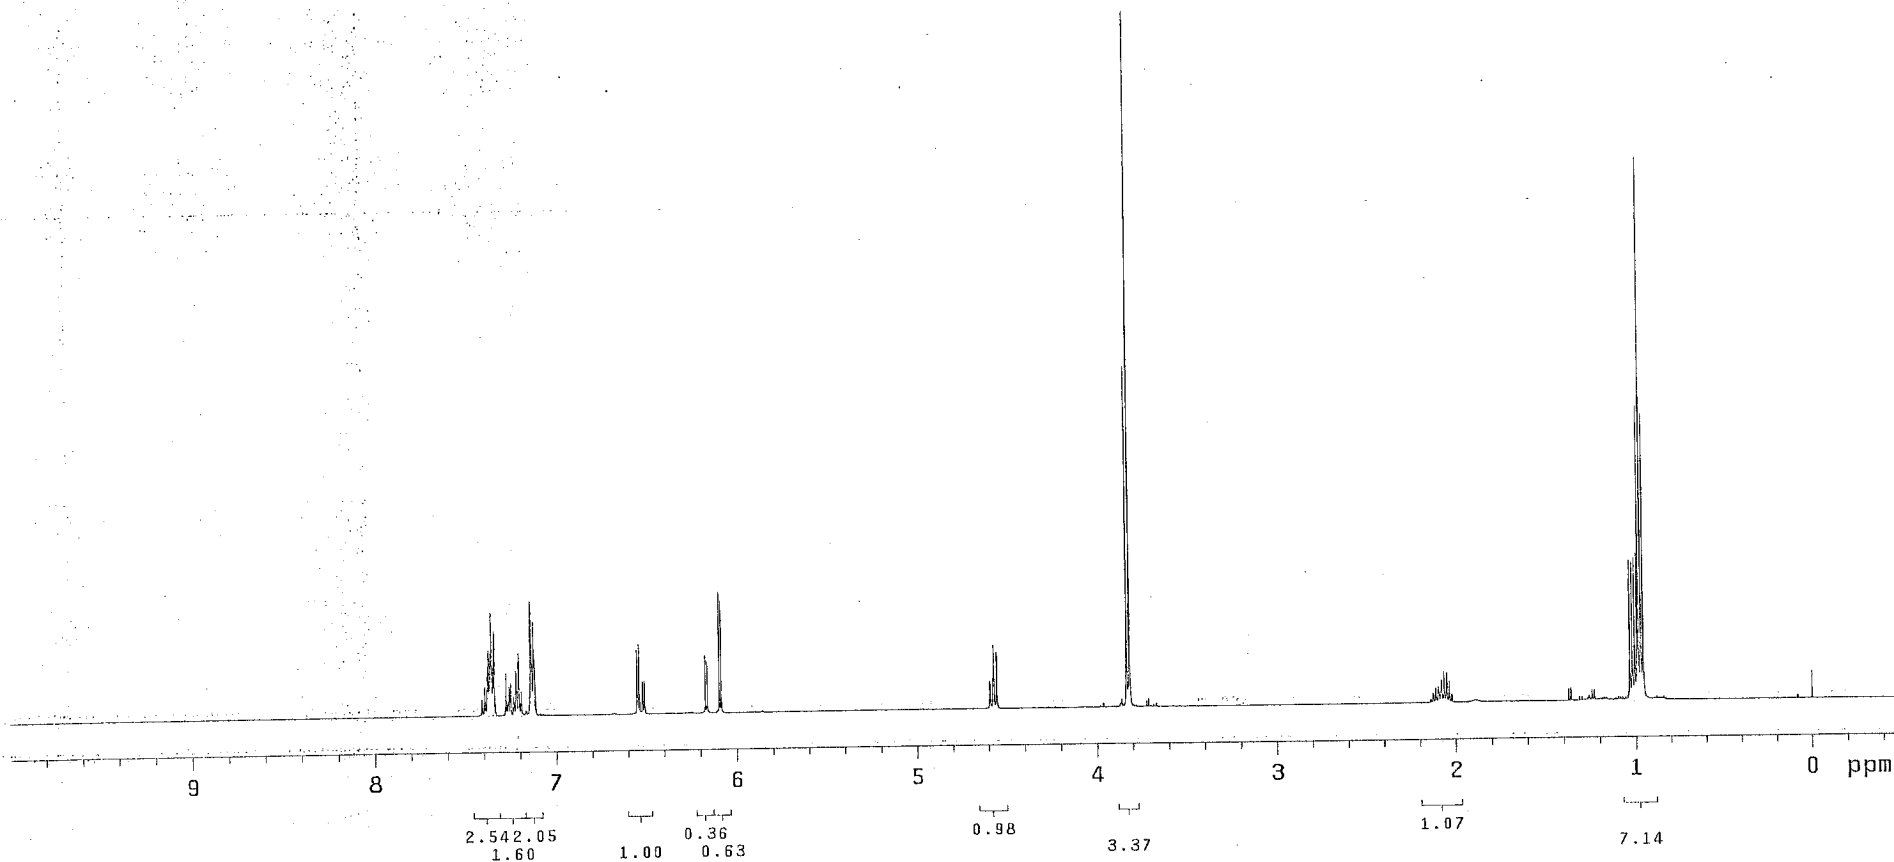

Fractions 17-25

Sample: YM-1-10  
Sample ID: s\_20120907\_08  
File: /home/walkup/vnmrsys/

Pulse Sequence: s2pul

Solvent: cdcl3  
Temp. 26.0 C / 299.1 K  
Operator: walkup  
File: cdc13\_01  
VNMR5-500 "NMR500"

Relax. delay 1.000 sec  
Pulse 45.0 degrees  
Acq. time 1.300 sec  
Width 30487.8 Hz  
256 repetitions  
OBSERVE C13, 125.6576166 MHz  
DECOUPLE H1, 499.7341220 MHz  
Power 42 dB  
continuously on  
WALTZ-16 modulated  
DATA PROCESSING  
Line broadening 0.5 Hz  
FT size 131072  
Total time 9 min, 51 sec

# 1-Phenoxycarbonyl-2-isopropyl-3-methoxy-1,2-dihydropyrazine (3d)

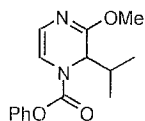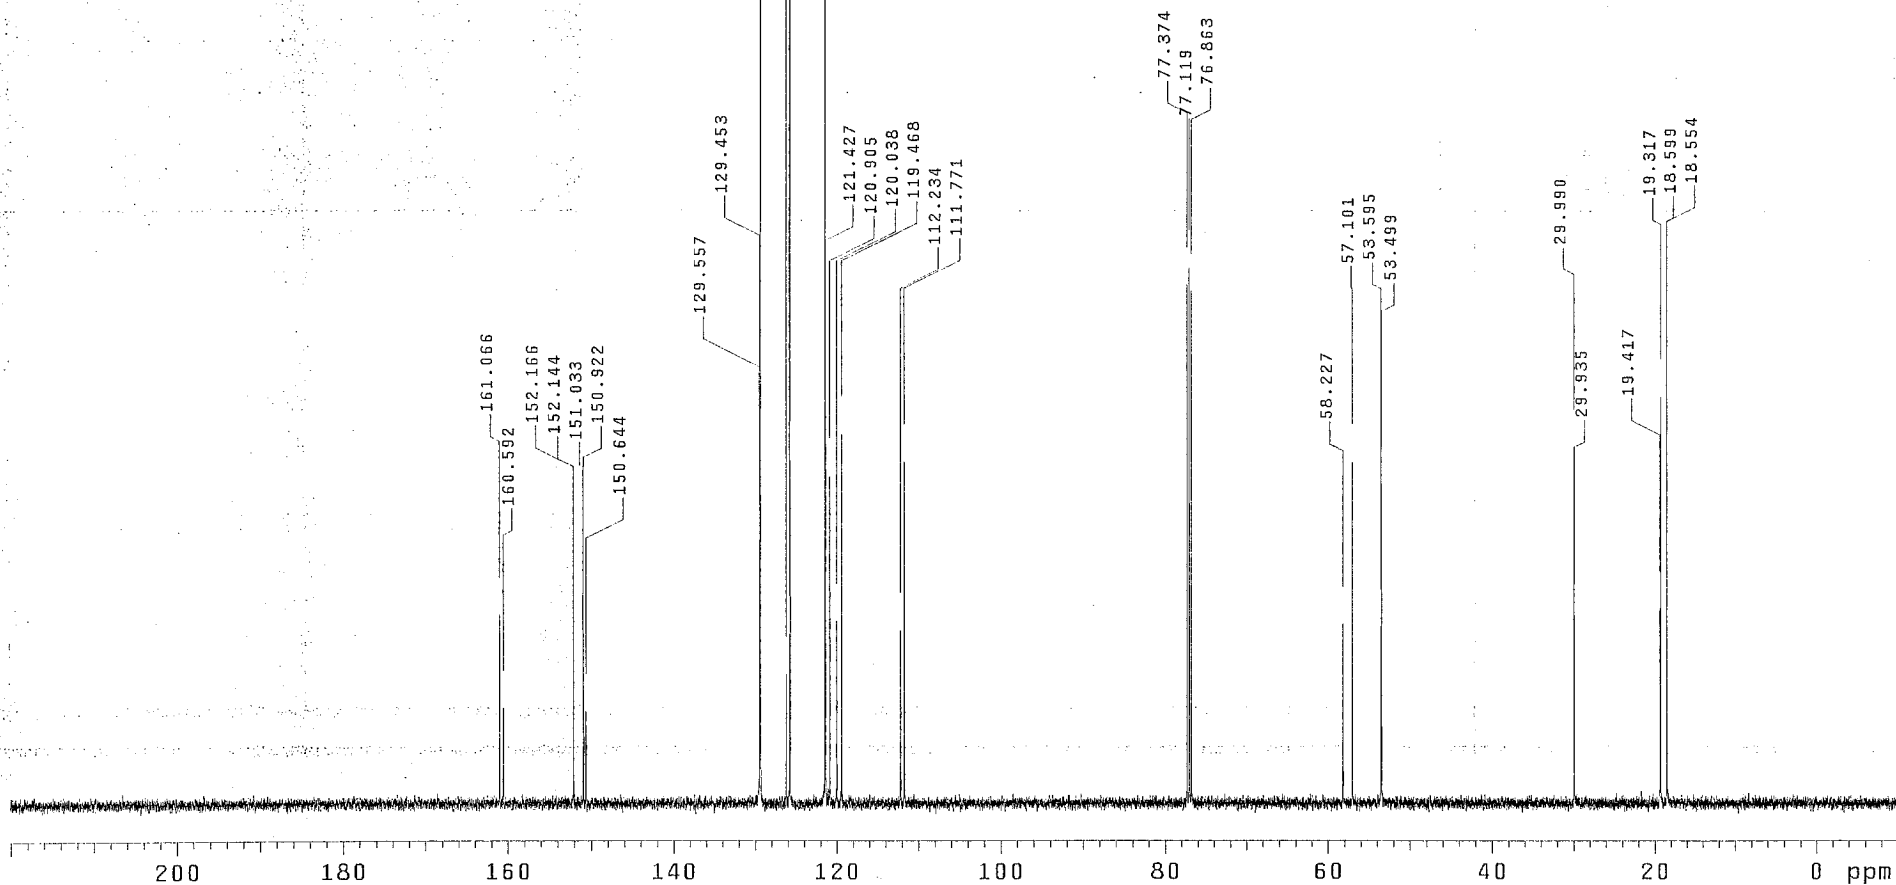

Band 1

Sample: YM-1-13  
Sample ID: s\_20120926\_05  
File: /home/walkup/vnmrsys/da

Pulse Sequence: s2pul

Solvent: cdcl3  
Temp. 26.0 C / 299.1 K  
Operator: walkup  
File: cdcl3\_01  
VNMR5-500 "NMR500"

Relax. delay 1.000 sec  
Pulse 45.0 degrees  
Acq. time 2.049 sec  
Width 8012.8 Hz  
8 repetitions  
OBSERVE H1, 499.7316295 MHz  
DATA PROCESSING  
Resol. enhancement -0.0 Hz  
FT size 65536  
Total time 0 min, 31 sec

# 1-Phenoxycarbonyl-2-cyclopentyl-3-methoxy-1,2-dihydropyrazine (3e)

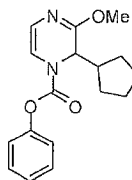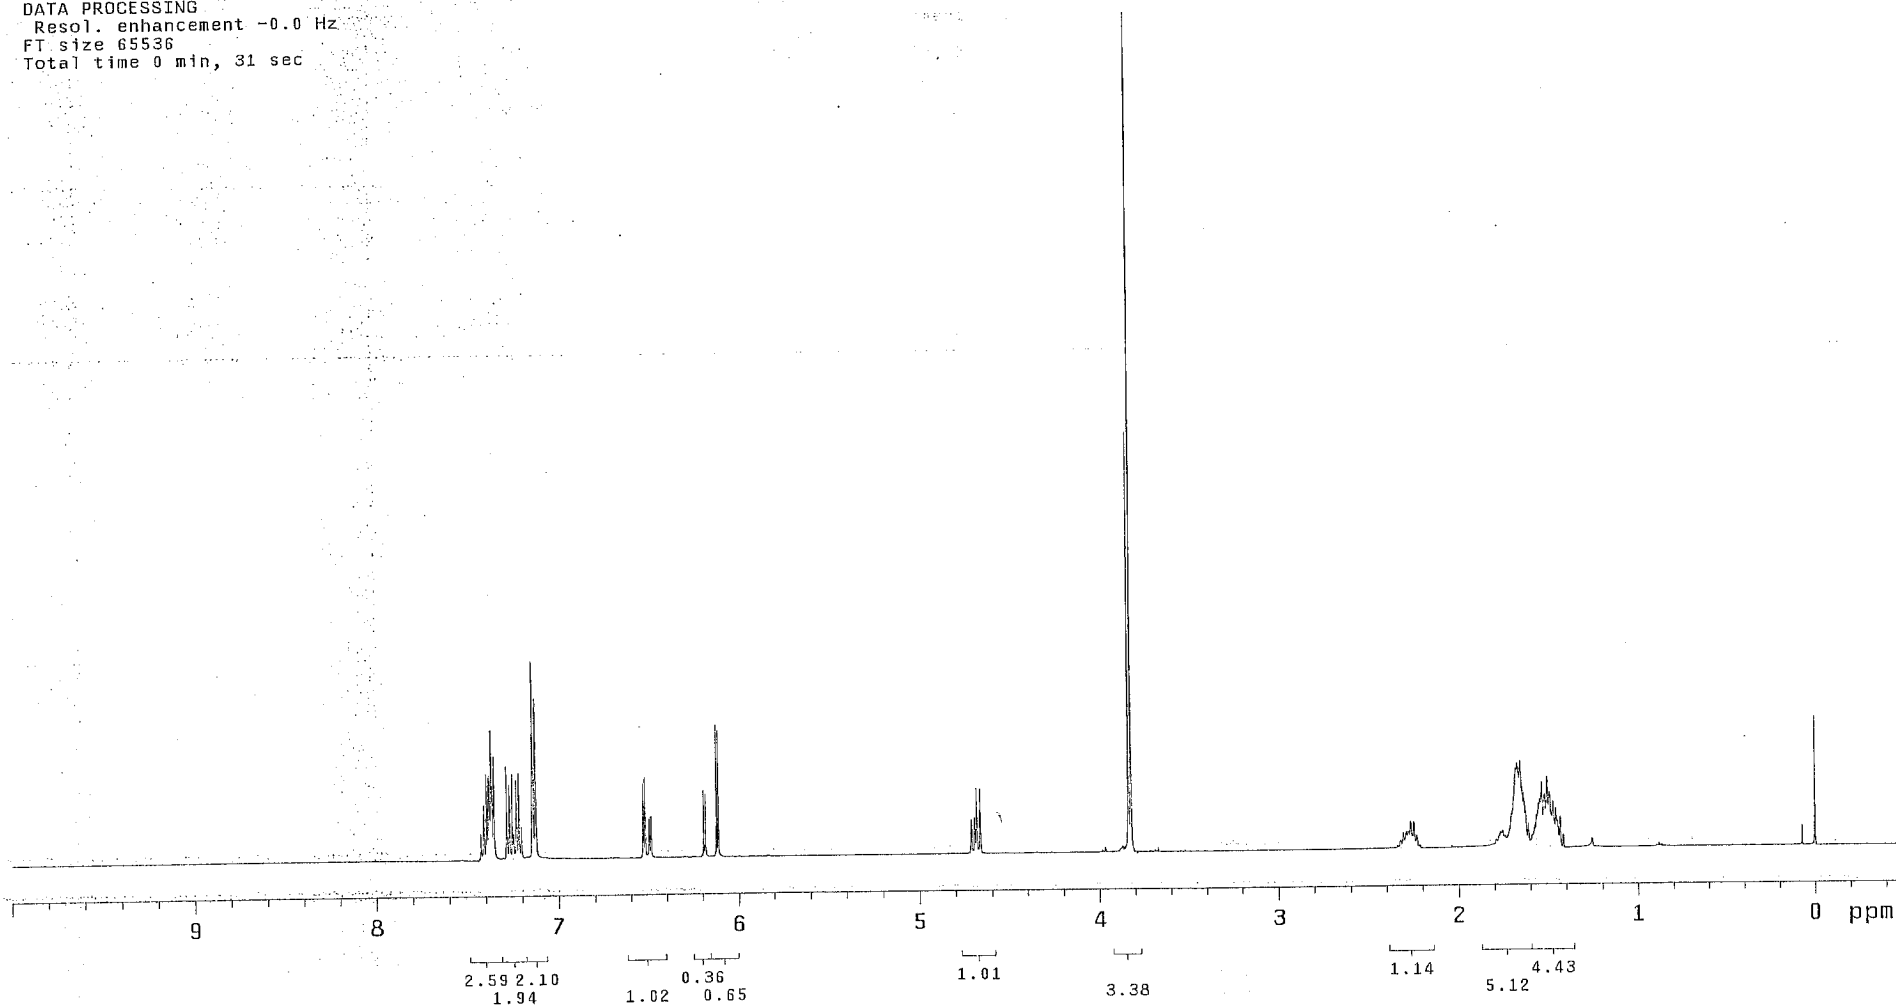



# 1-Phenoxycarbonyl-2-cyclopentyl-3-methoxy-1,2-dihydropyrazine (3e)

Band 1

Sample: YM-1-13  
Sample ID: s\_20120926\_06  
File: /home/walkup/vnmrsys/di

Pulse Sequence: s2pul  
Solvent: cdc13  
Temp. 26.0 C / 299.1 K  
Operator: walkup  
File: cdc13\_01  
VNMR5-500 "NMR500"

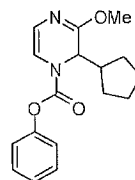

Relax. delay 1.000 sec  
Pulse 45.0 degrees  
Acq. time 1.300 sec  
Width 30487.8 Hz  
256 repetitions  
OBSERVE C13, 125.6576166 MHz  
DECOUPLE H1, 499.7341220 MHz  
Power 42 dB  
continuously on  
WALTZ-16 modulated  
DATA PROCESSING  
Line broadening 0.5 Hz  
FT size 131072  
Total time 9 min, 51 sec

Relax. delay 1.000 sec  
Pulse 45.0 degrees  
Acq. time 1.300 sec  
Width 30487.8 Hz  
256 repetitions  
OBSERVE C13, 125.6576166 MHz  
DECOUPLE H1, 499.7341220 MHz  
Power 42 dB  
continuously on  
WALTZ-16 modulated  
DATA PROCESSING  
Line broadening 0.5 Hz  
FT size 131072  
Total time 9 min, 51 sec

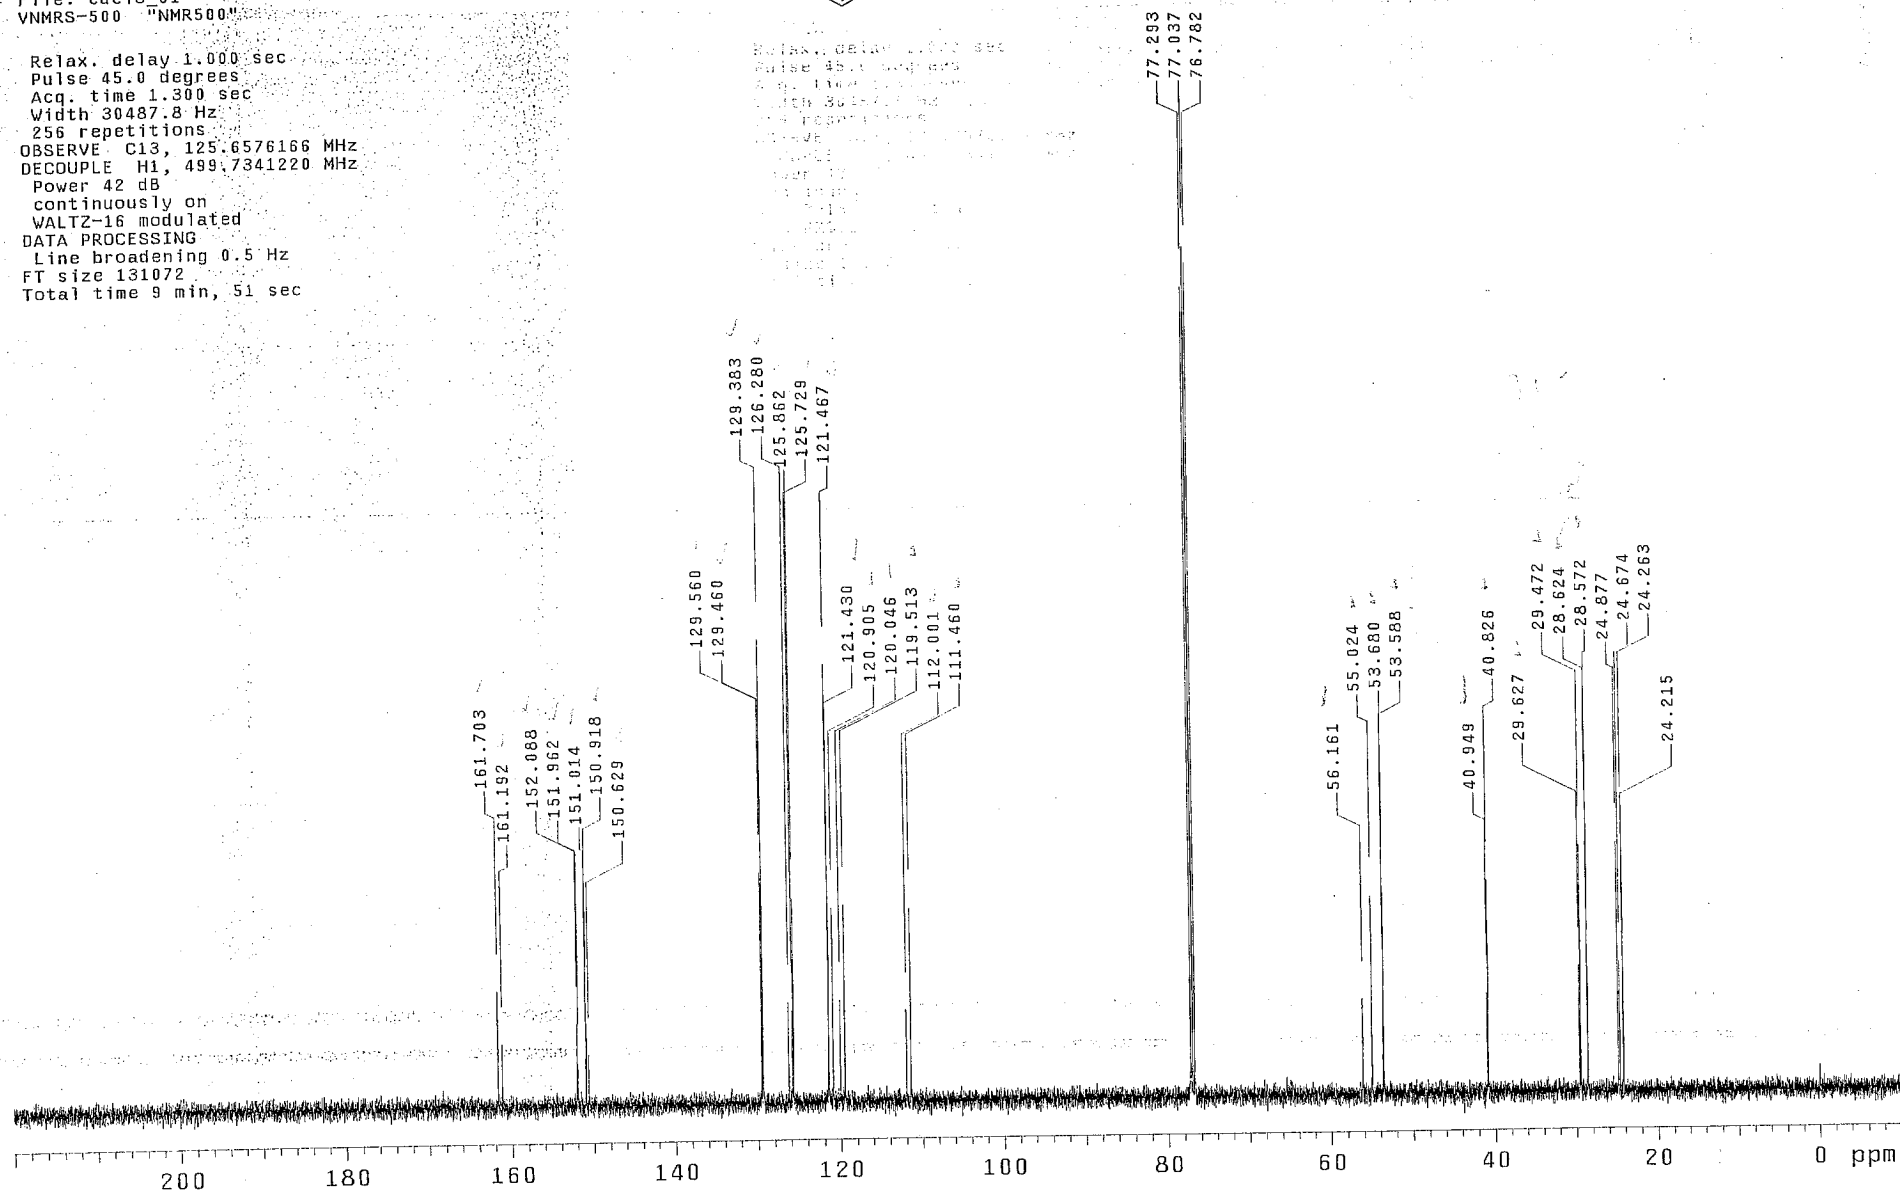

1-Phenoxycarbonyl-2-benzyl-3-

Sample: VRS-6-49B

Sample ID: s\_20120611\_10

File: s\_20120611\_10/data/cdc

Pulse Sequence: s2pul

Solvent: cdc13

Temp. 26.0 C / 299.1 K

Operator: walkup

File: cdc13\_01

VNMRS-500 "NMR500"

Relax. delay 1.000 sec

Pulse 45.0 degrees

Acq. time 2.049 sec

Width 8012.8 Hz

8 repetitions

OBSERVE H1, 499.7316502 MHz

DATA PROCESSING

Resol. enhancement -0.0 Hz

FT size 65536

Total time 0 min, 31 sec

# 1-Phenoxycarbonyl-2-benzyl-3-methoxy-1,2-dihydropyrazine (3f)

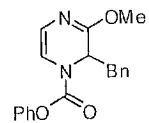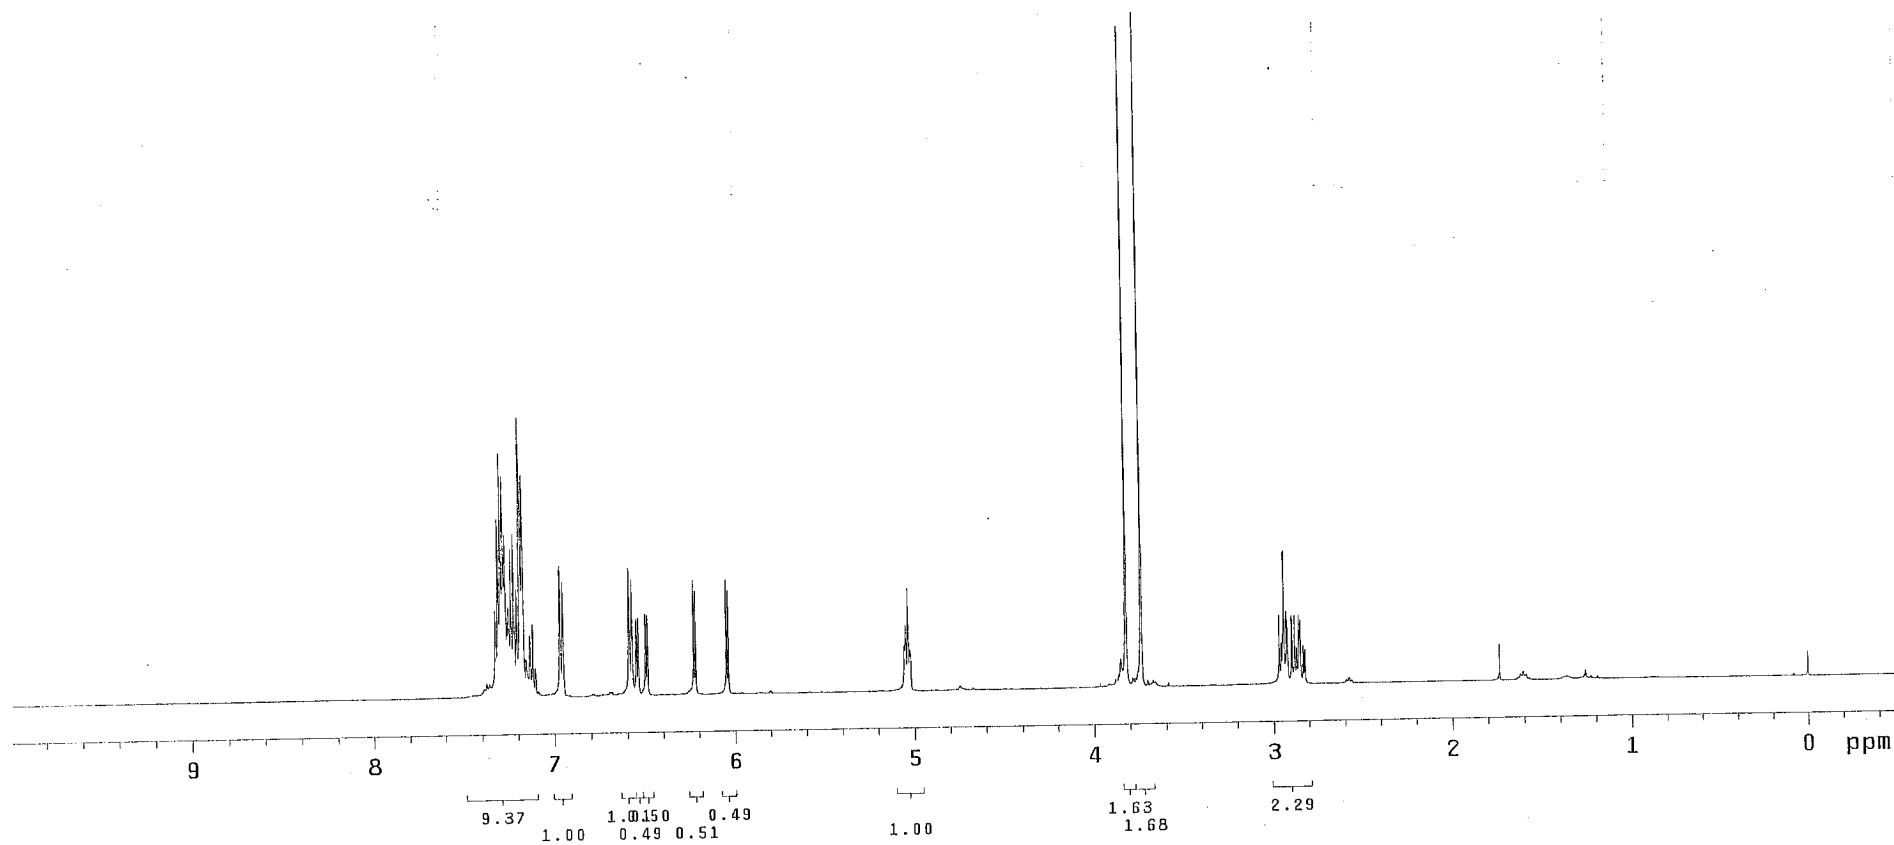

# 1-Phenoxycarbonyl-2-benzyl-3-methoxy-1,2-dihydropyrazine (3f)

1-Phenoxycarbonyl-2-benzyl-3-

Sample: VRS-6-49B  
Sample ID: s\_20120611\_11  
File: s\_20120611\_11/data/cdc

Pulse Sequence: s2pu1  
Solvent: cdcl3  
Temp. 26.0 C / 299.1 K  
Operator: walkup  
File: cdcl3\_01  
VNMR5-500 "NMR500"

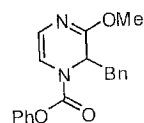

Relax. delay 1.000 sec  
Pulse 45.0 degrees  
Acq. time 1.300 sec  
Width 30487.8 Hz  
256 repetitions  
OBSERVE C13, 125.6576344 MHz  
DECOUPLE H1, 499.7341220 MHz  
Power 42 dB  
continuously on  
WALTZ-16 modulated  
DATA PROCESSING  
Line broadening 0.5 Hz  
FT size 131072  
Total time 9 min, 51 sec

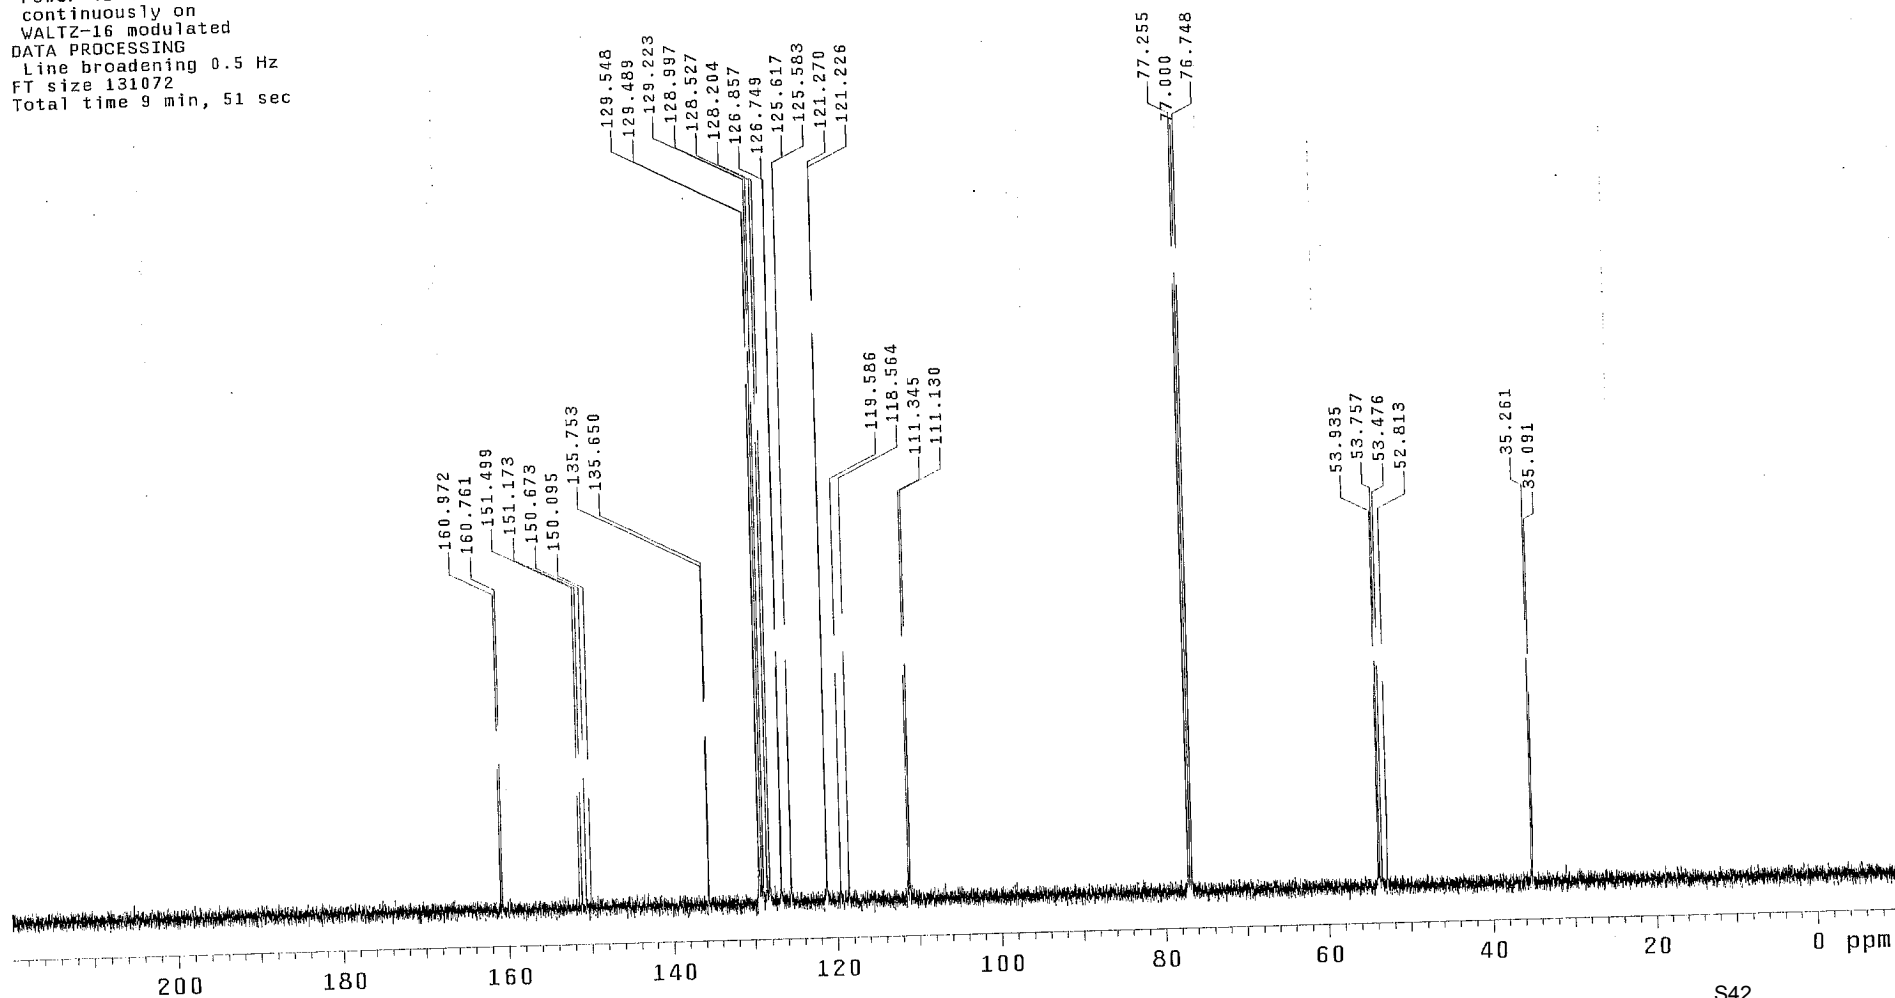

ReX'd

Sample: VRS-6-99B  
Sample ID: s\_20120823\_01  
File: s\_20120823\_01/data/cdcl3\_01.

Pulse Sequence: s2pul

Solvent: cdcl3  
Temp. 26.0 C / 299.1 K  
Operator: walkup  
File: cdcl3\_01  
VNMR5-500 "NMR500"

Relax. delay 1.000 sec  
Pulse 45.0 degrees  
Acq. time 2.049 sec  
Width 8012.8 Hz  
8 repetitions  
OBSERVE H1, 499.7316336 MHz  
DATA PROCESSING  
Resol. enhancement -0.0 Hz  
FT size 65536  
Total time 0 min, 31 sec

# 1-Phoxycarbonyl-2-(2-bromobenzyl)-3-methoxy-1,2-dihydropyrazine (3g)

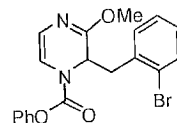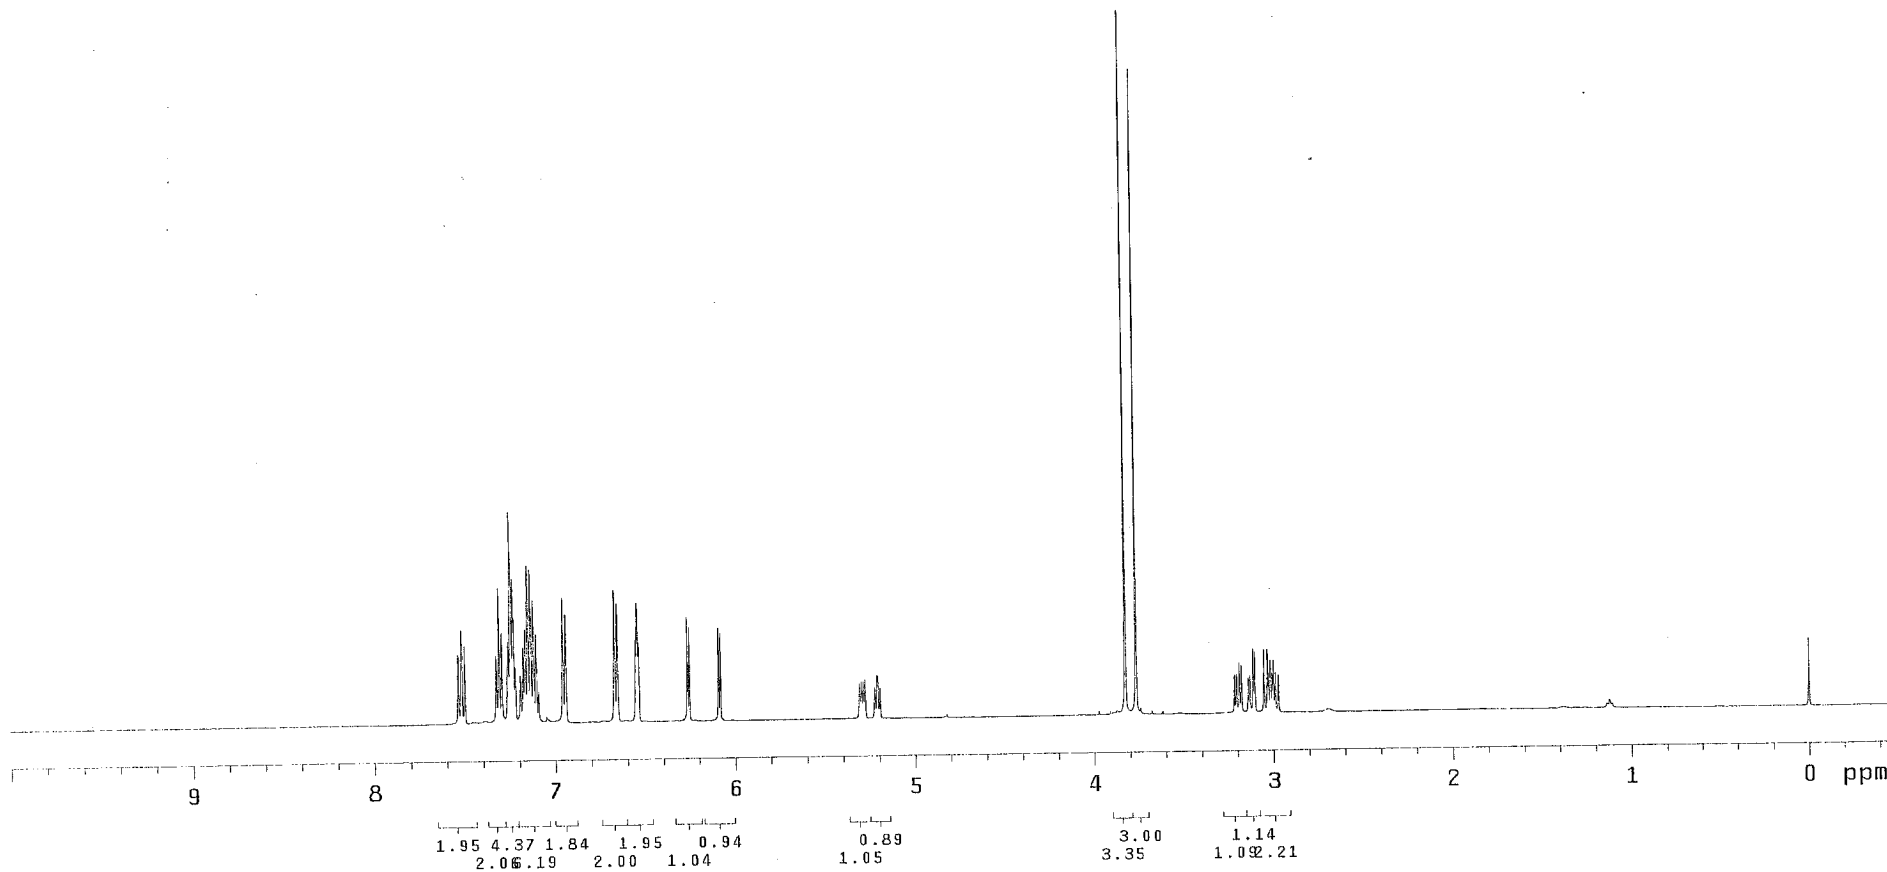

ReX'd

Sample: VRS-6-99B  
Sample ID: s\_20120823\_02  
File: s\_20120823\_02/data/cdc  
Automation directory: /home/

Pulse Sequence: s2pu1

Solvent: cdcl3  
Temp. 26.0 C / 299.1 K  
Operator: walkup  
File: cdcl3\_01  
VNMR5-500 "NMR500"

Relax. delay 1.000 sec  
Pulse 45.0 degrees  
Acq. time 1.300 sec  
Width 30487.8 Hz  
256 repetitions  
OBSERVE C13, 125.6576166 MHz  
DECOUPLE H1, 499.7341220 MHz  
Power 42 dB  
continuously on  
WALTZ-16 modulated  
DATA PROCESSING  
Line broadening 0.5 Hz  
FT size 131072  
Total time 9 min, 51 sec

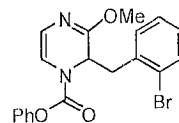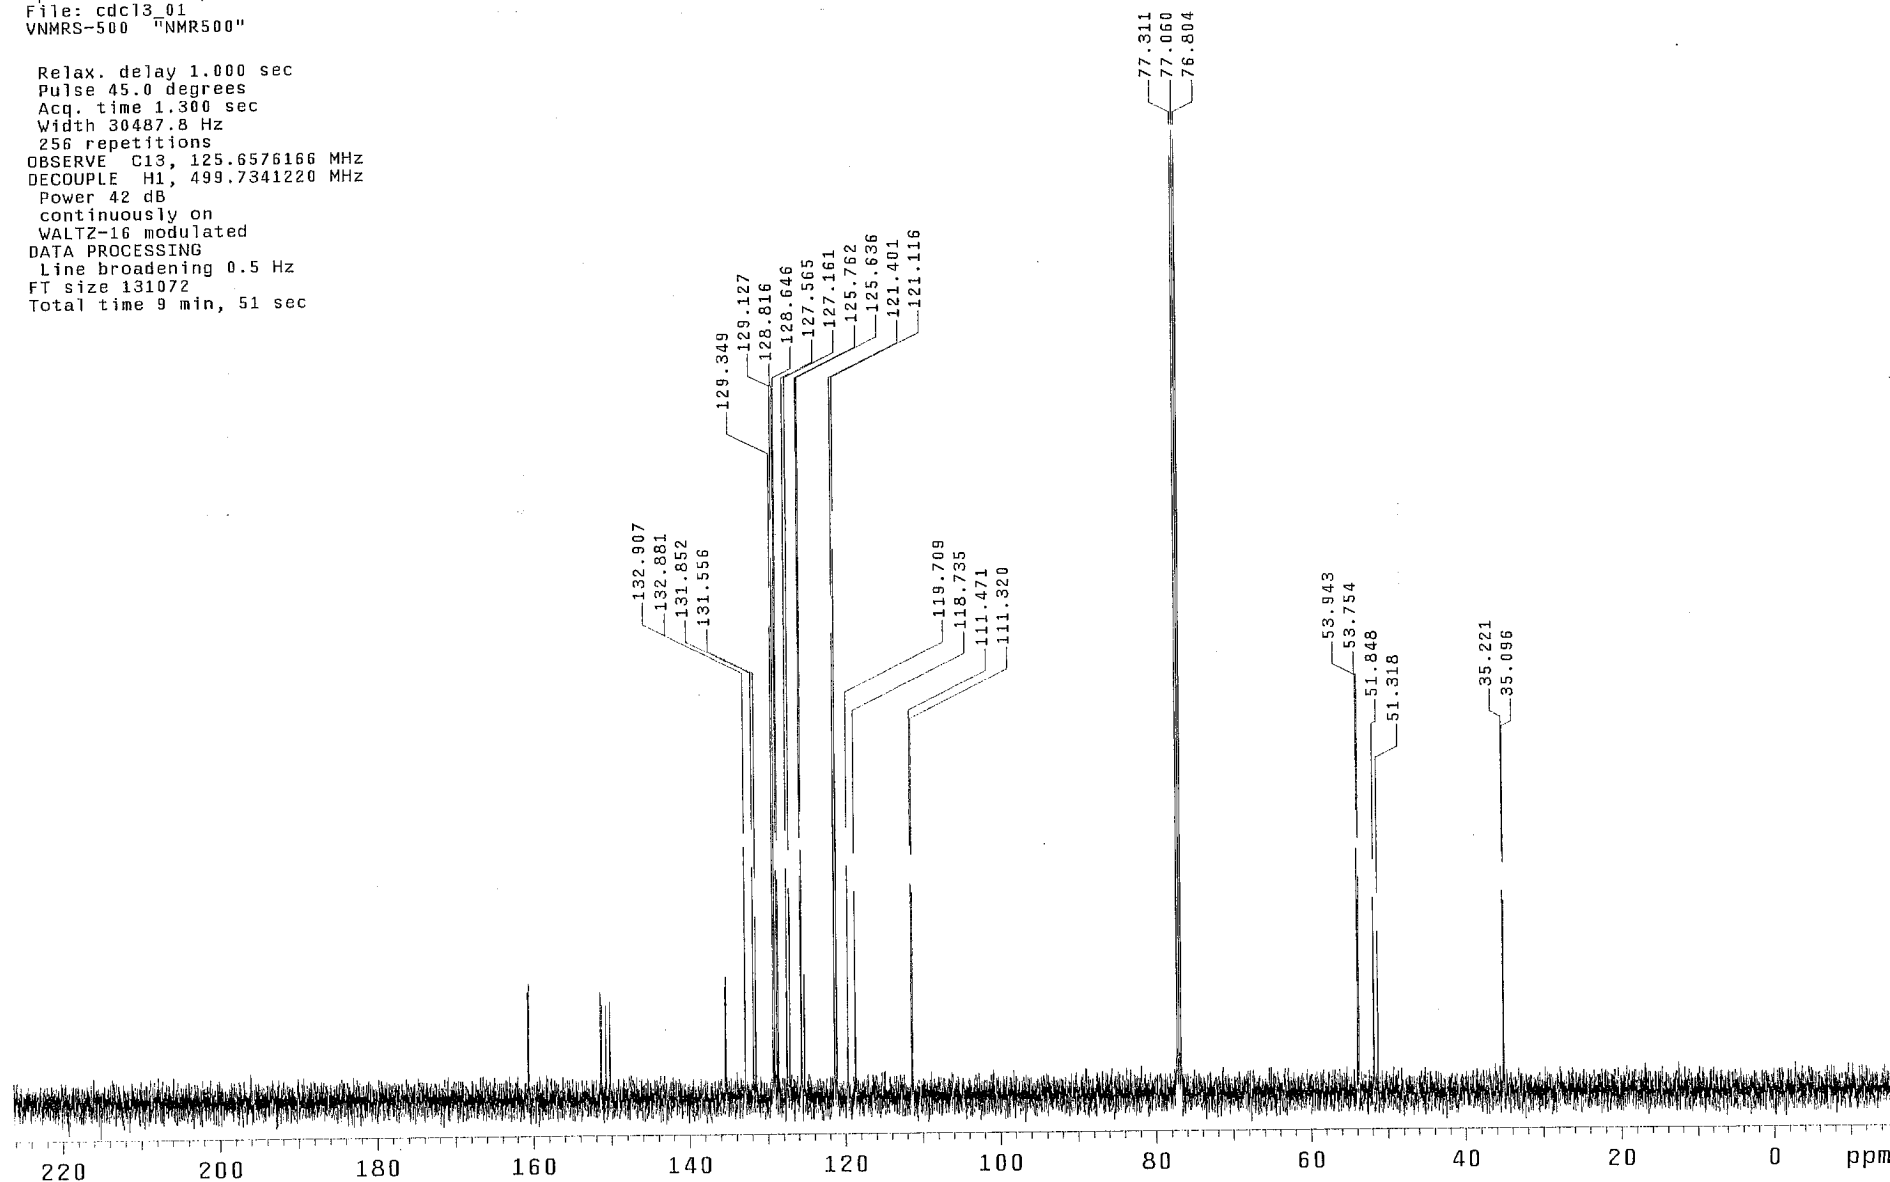

Target (ISCO)

Sample: VRS-6-48B

Sample ID: s\_20140307\_01

File: s\_20140307\_01/data/cdc13\_01 #14

Pulse Sequence: s2pul

Solvent: cdc13

Ambient temperature

Operator: walkup

File: cdc13\_01

VNMRS-500 "NMR500"

Relax. delay 1.000 sec

Pulse 45.0 degrees

Acq. time 2.049 sec

Width 8012.8 Hz

8 repetitions

OBSERVE H1, 499.7316361 MHz

DATA PROCESSING

Resol. enhancement -0.0 Hz

FT size 65536

Total time 0 min, 31 sec

# 1-Phenoxycarbonyl-2-(4-chlorophenyl)-3-methoxy-1,2-dihydropyrazine (3h)

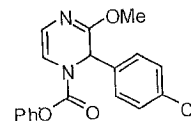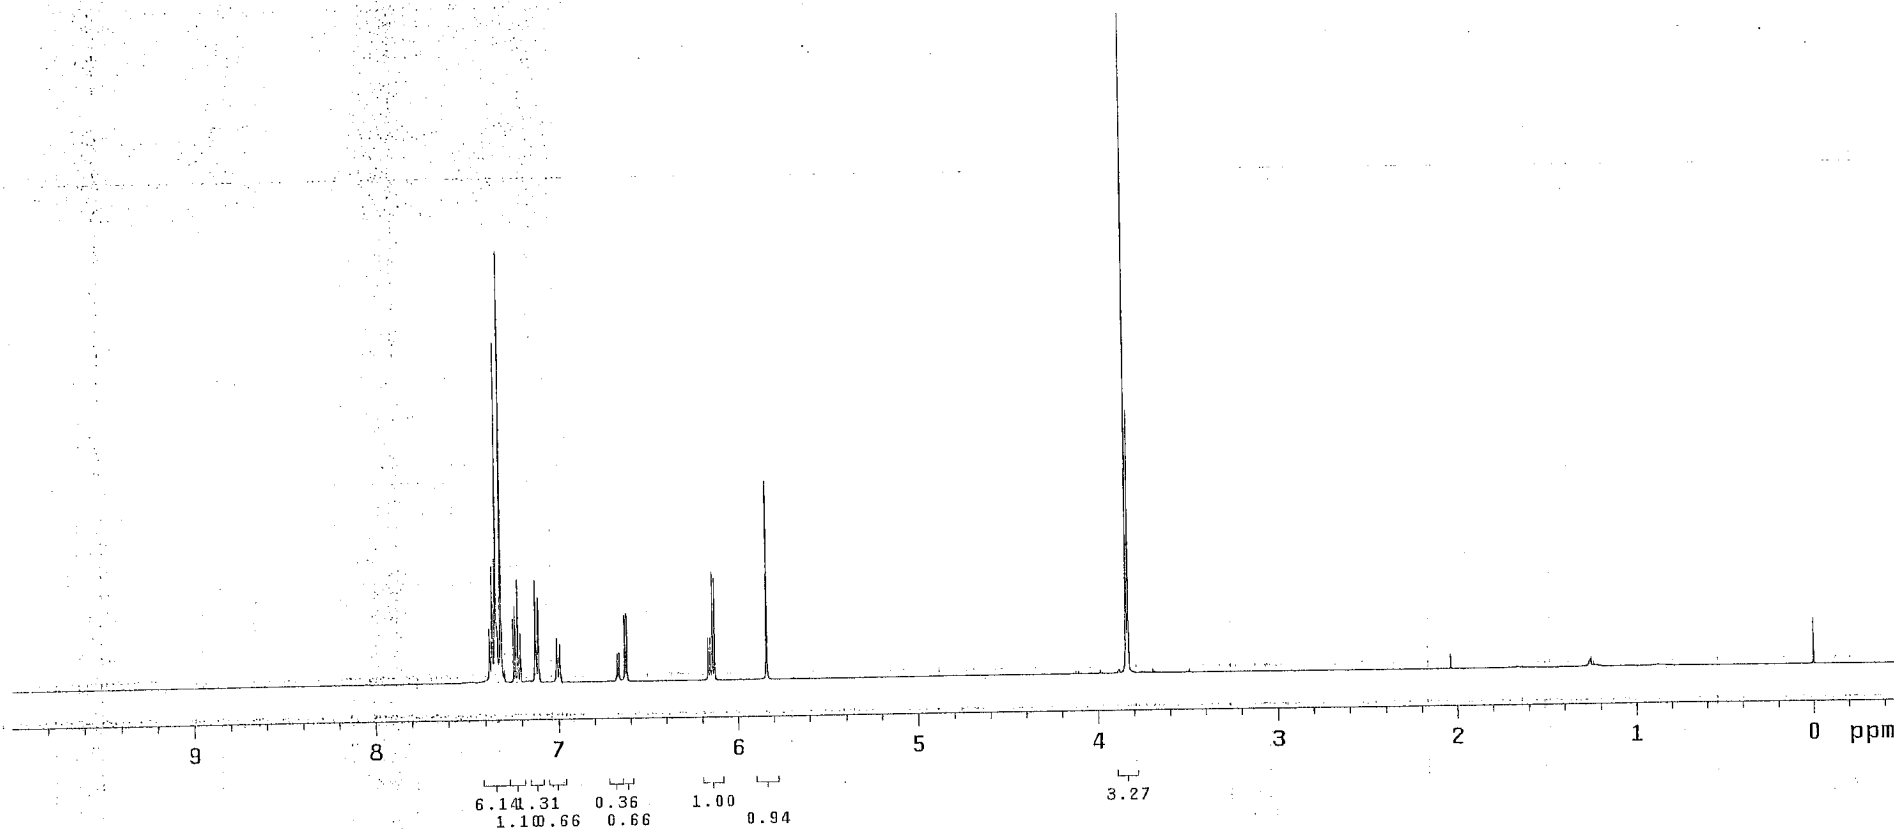

# 1-Phenoxycarbonyl-2-(4-chlorophenyl)-3-methoxy-1,2-dihydropyrazine (3h)

Target (ISCO)

Sample: VRS-6-48B

Sample ID: s\_20140307\_02

File: s\_20140307\_02/data/cdc13\_01.fid

Pulse Sequence: s2pul

Solvent: cdcl3

Ambient temperature

Operator: walkup

File: cdc13\_01

VNMR5-500, "NMR500"

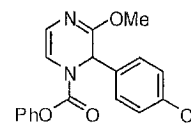

Relax: delay 1.000 sec  
Pulse 45.0 degrees  
Acq. time 1.300 sec  
Width 30487.8 Hz  
256 repetitions  
OBSERVE: C13, 125.6576247 MHz  
DECOUPLE: H1, 499.7341220 MHz  
Power 42 dB  
continuously on  
WALTZ-16 modulated  
DATA PROCESSING  
Line broadening 0.5 Hz  
FT size 131072  
Total time 9 min, 51 sec

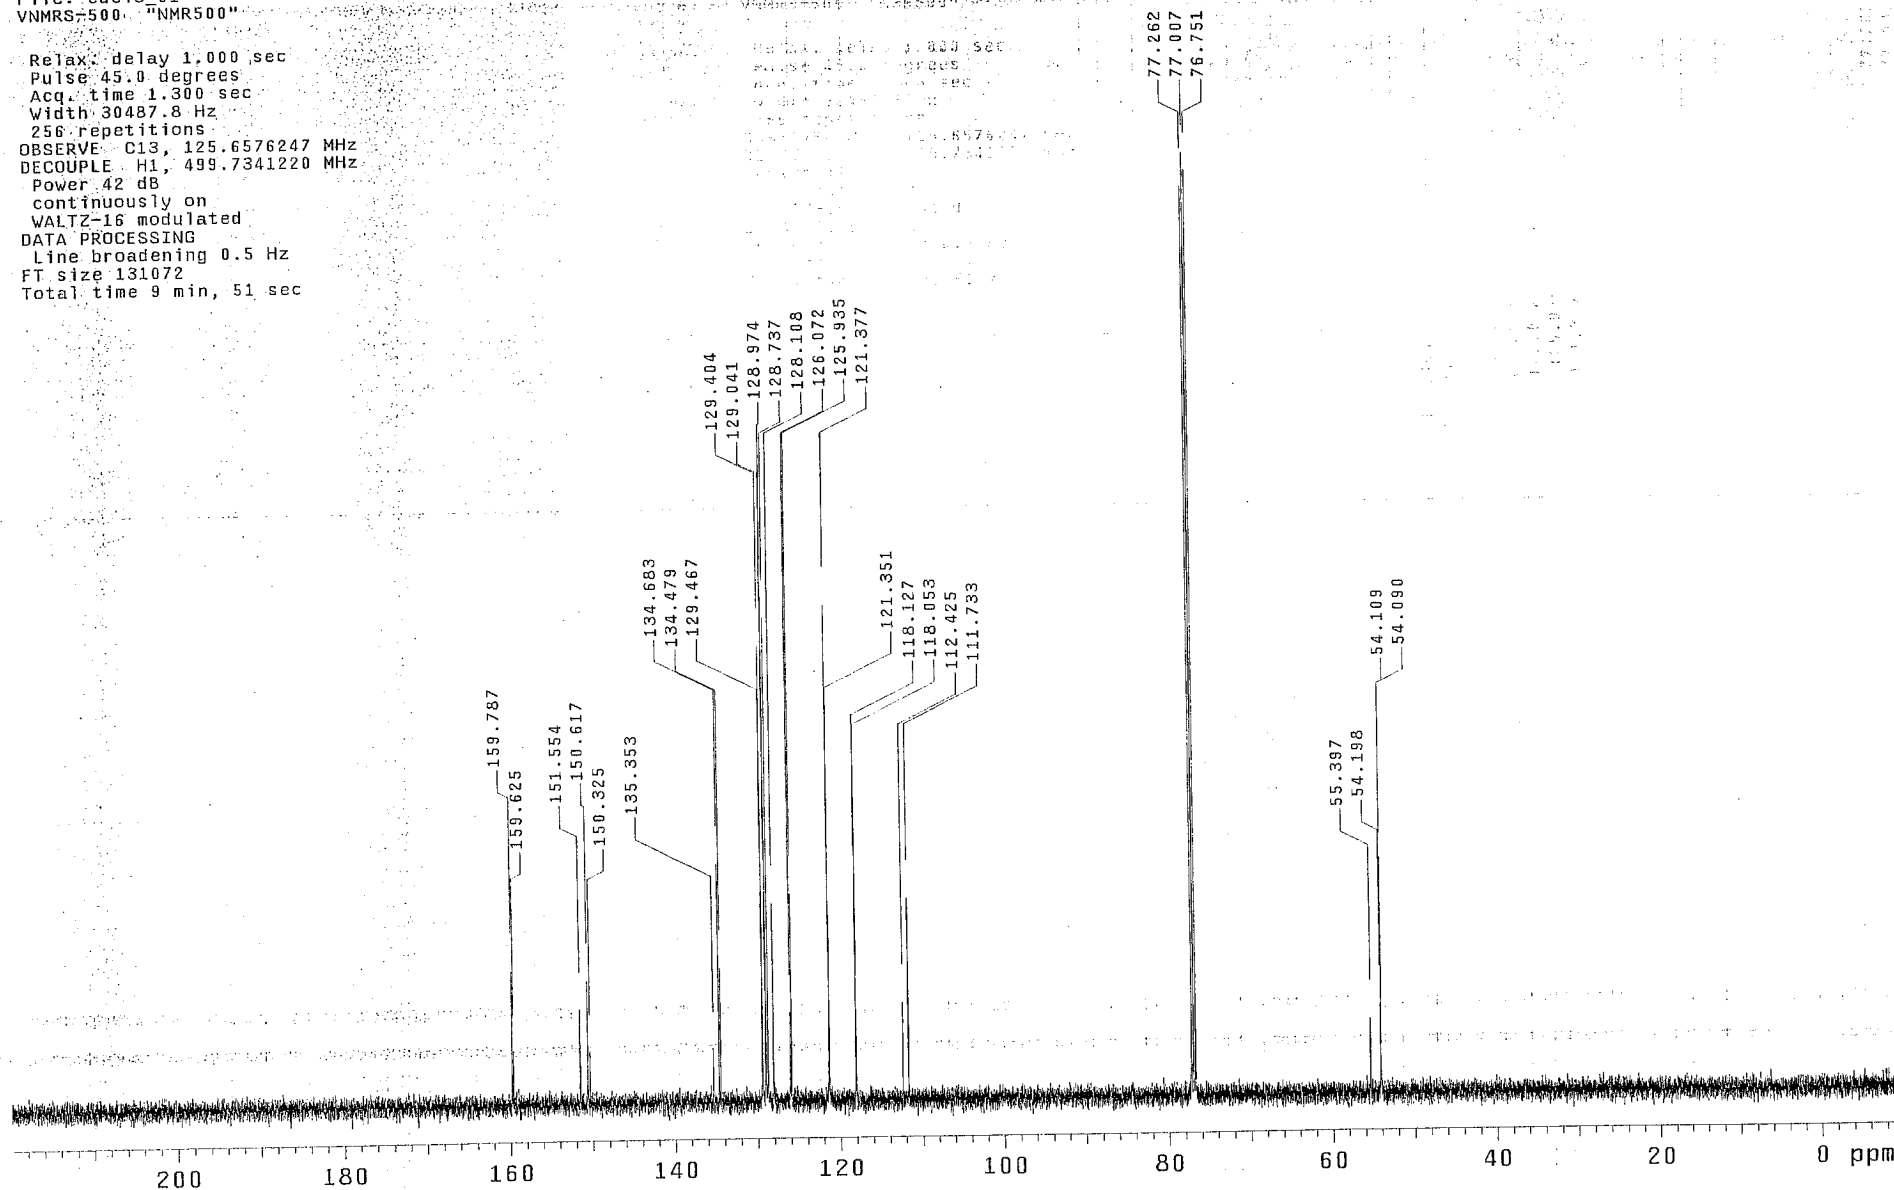

Purified

Sample: VRS-6-48A  
Sample ID: s\_20120613\_02  
File: s\_20120613\_02/data/cdcl3\_01.f

Pulse Sequence: s2pul

Solvent: cdcl3  
Temp. 26.0 C / 299.1 K  
Operator: walkup  
File: cdcl3\_01  
VNMRS-500 "NMR500"

Relax. delay 1.000 sec  
Pulse 45.0 degrees  
Acq. time 2.049 sec  
Width 8012.8 Hz  
8 repetitions  
OBSERVE H1, 499.7316493 MHz  
DATA PROCESSING  
Resol. enhancement -0.0 Hz  
FT size 65536  
Total time 0 min, 31 sec

### 1-Phenoxy carbonyl-2-(4-methoxyphenyl)-3-methoxy-1,2-dihydropyrazine (3i)

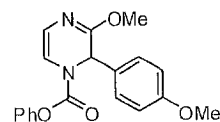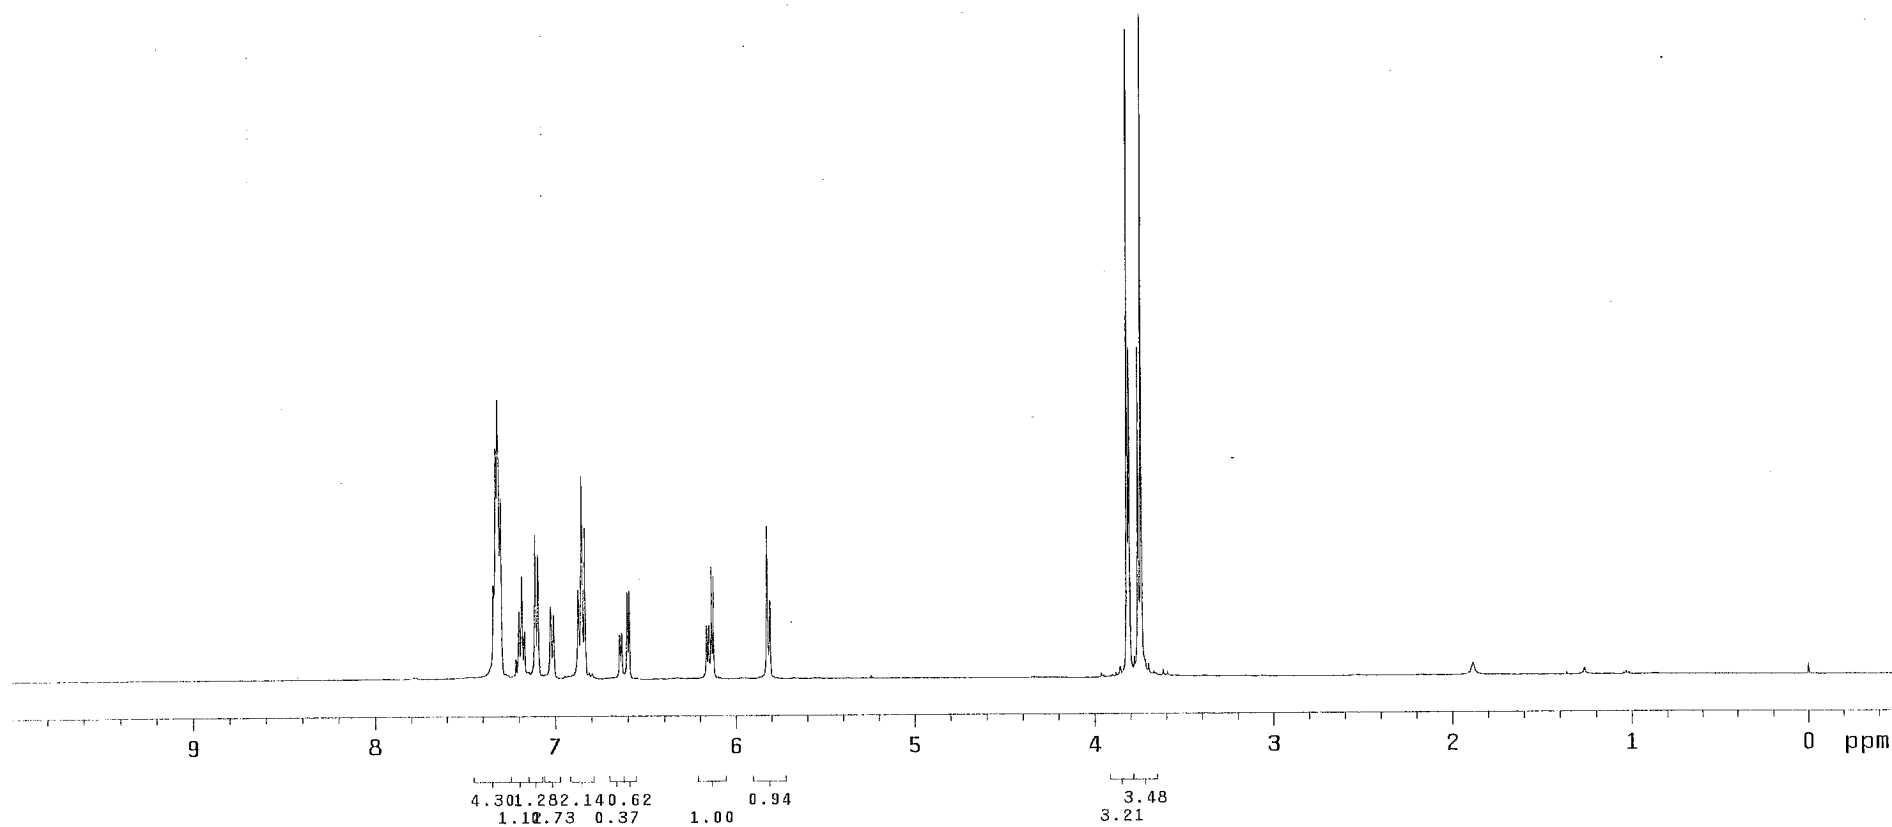



Purified

Sample: VRS-6-48A  
Sample ID: s\_20120613\_03  
File: s\_20120613\_03/data/cdcl3\_01.fic

Pulse Sequence: s2pul

Solvent: cdcl3  
Temp. 25.0 C / 299.1 K  
Operator: walkup  
File: cdcl3\_01  
VNMR5-500 "NMR500"

Relax. delay 1.000 sec  
Pulse 45.0 degrees  
Acq. time 1.300 sec  
Width 30487.8 Hz  
256 repetitions  
OBSERVE C13, 125.6576166 MHz  
DECOUPLE H1, 499.7341220 MHz  
Power 42 dB  
continuously on  
WALTZ-16 modulated  
DATA PROCESSING  
Line broadening 0.5 Hz  
FT size 131072  
Total time 9 min, 51 sec

# 1-Phenoxycarbonyl-2-(4-methoxyphenyl)-3-methoxy-1,2-dihydropyrazine (3i)

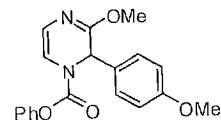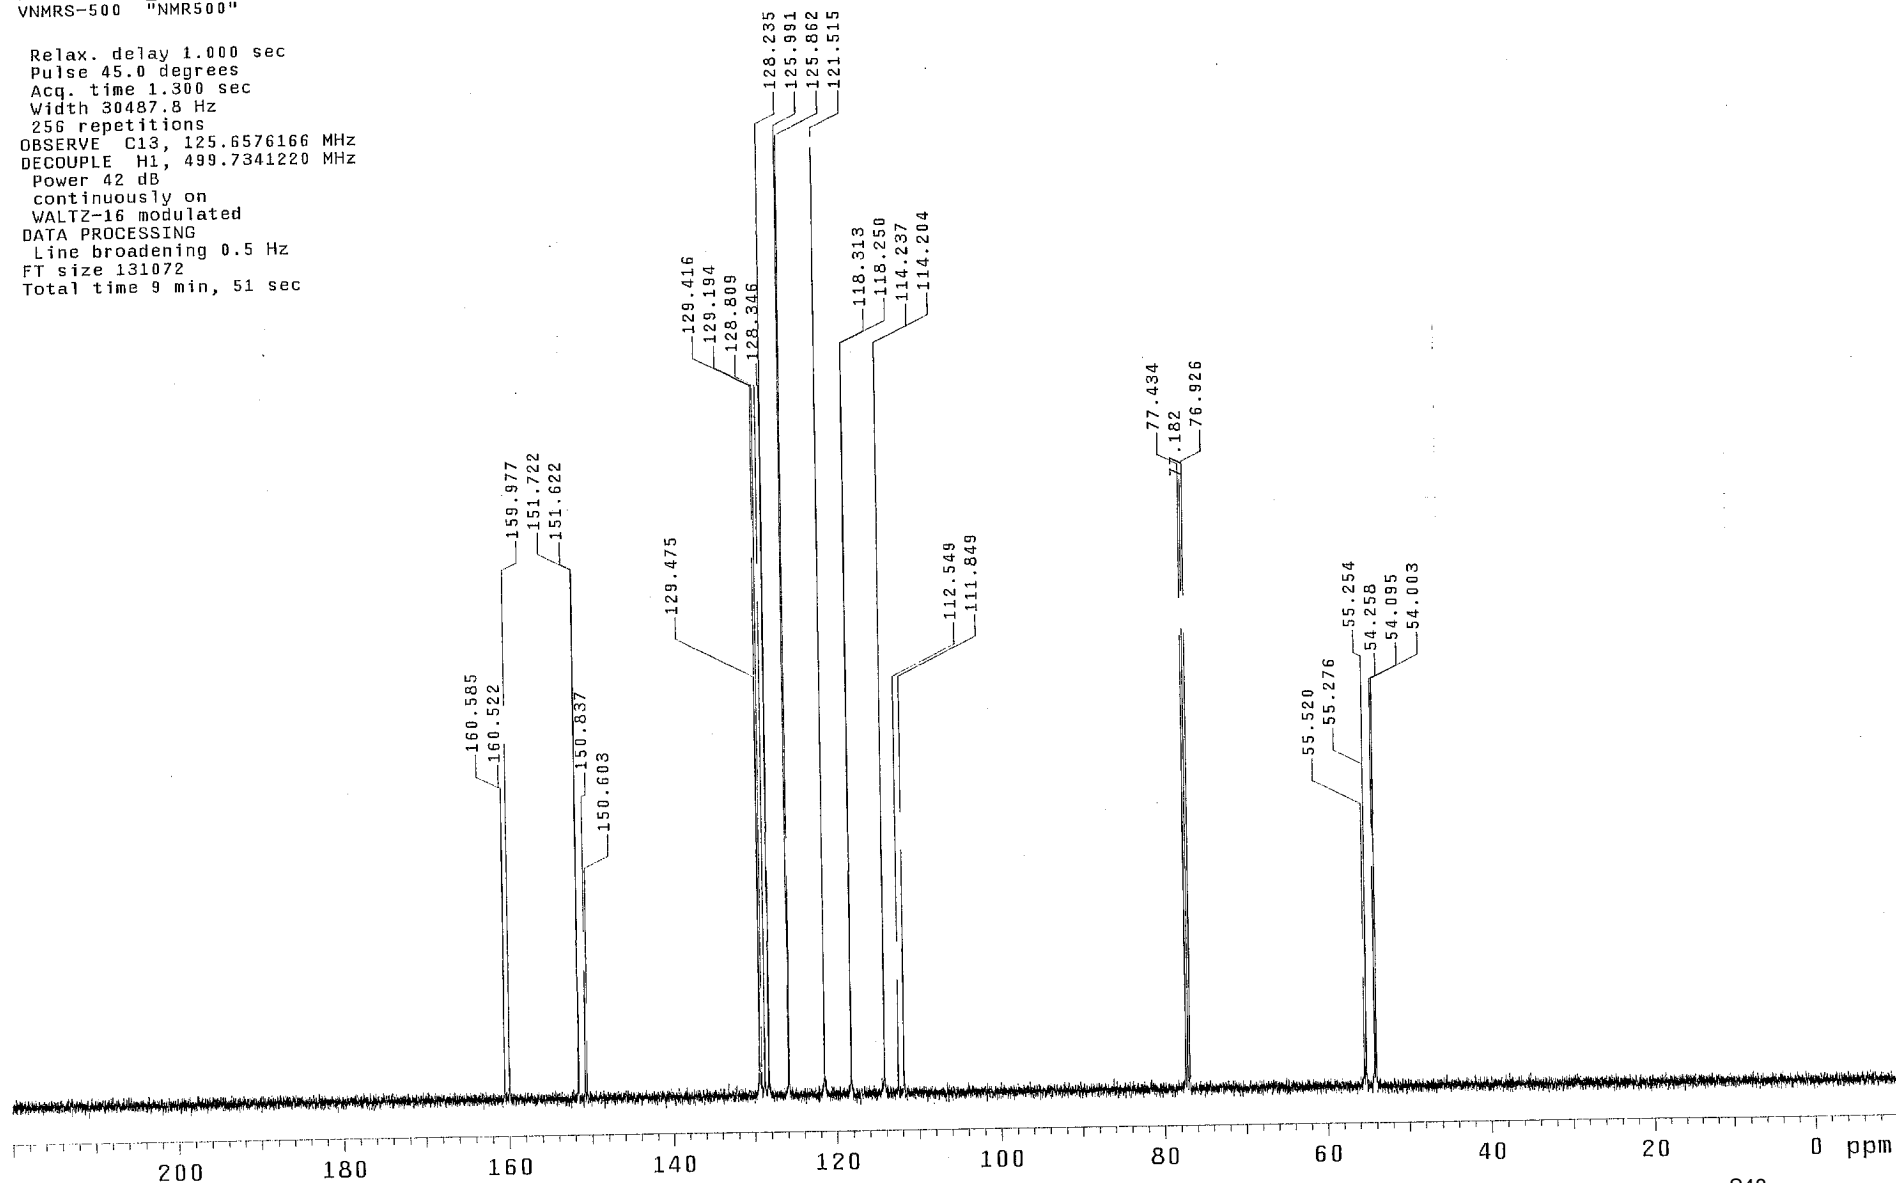

Target (ISCO)

Sample: VRS-6-49A  
Sample ID: s\_20140228\_07  
File: s\_20140228\_07/data/cdcl3\_01.f1

Pulse Sequence: s2pul

Solvent: cdcl3  
Ambient temperature  
Operator: walkup  
File: cdcl3\_01  
VNMRS-500 "NMR500"

Relax. delay 1.000 sec  
Pulse 45.0 degrees  
Acq. time 2.049 sec  
Width 8012.8 Hz  
8 repetitions  
OBSERVE H1, 499.7316767 MHz  
DATA PROCESSING  
Resol. enhancement -0.0 Hz  
FT size 65536  
Total time 0 min, 31 sec

# 1-Phenoxycarbonyl-2-(2,4-dimethylphenyl)-3-methoxy-1,2-dihydropyrazine (3j)

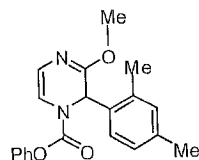

Acq. time 2.049 sec  
Width 8012.8 Hz  
8 repetitions  
OBSERVE H1, 499.7316767 MHz  
DATA PROCESSING  
Resol. enhancement -0.0 Hz  
FT size 65536  
Total time 0 min, 31 sec

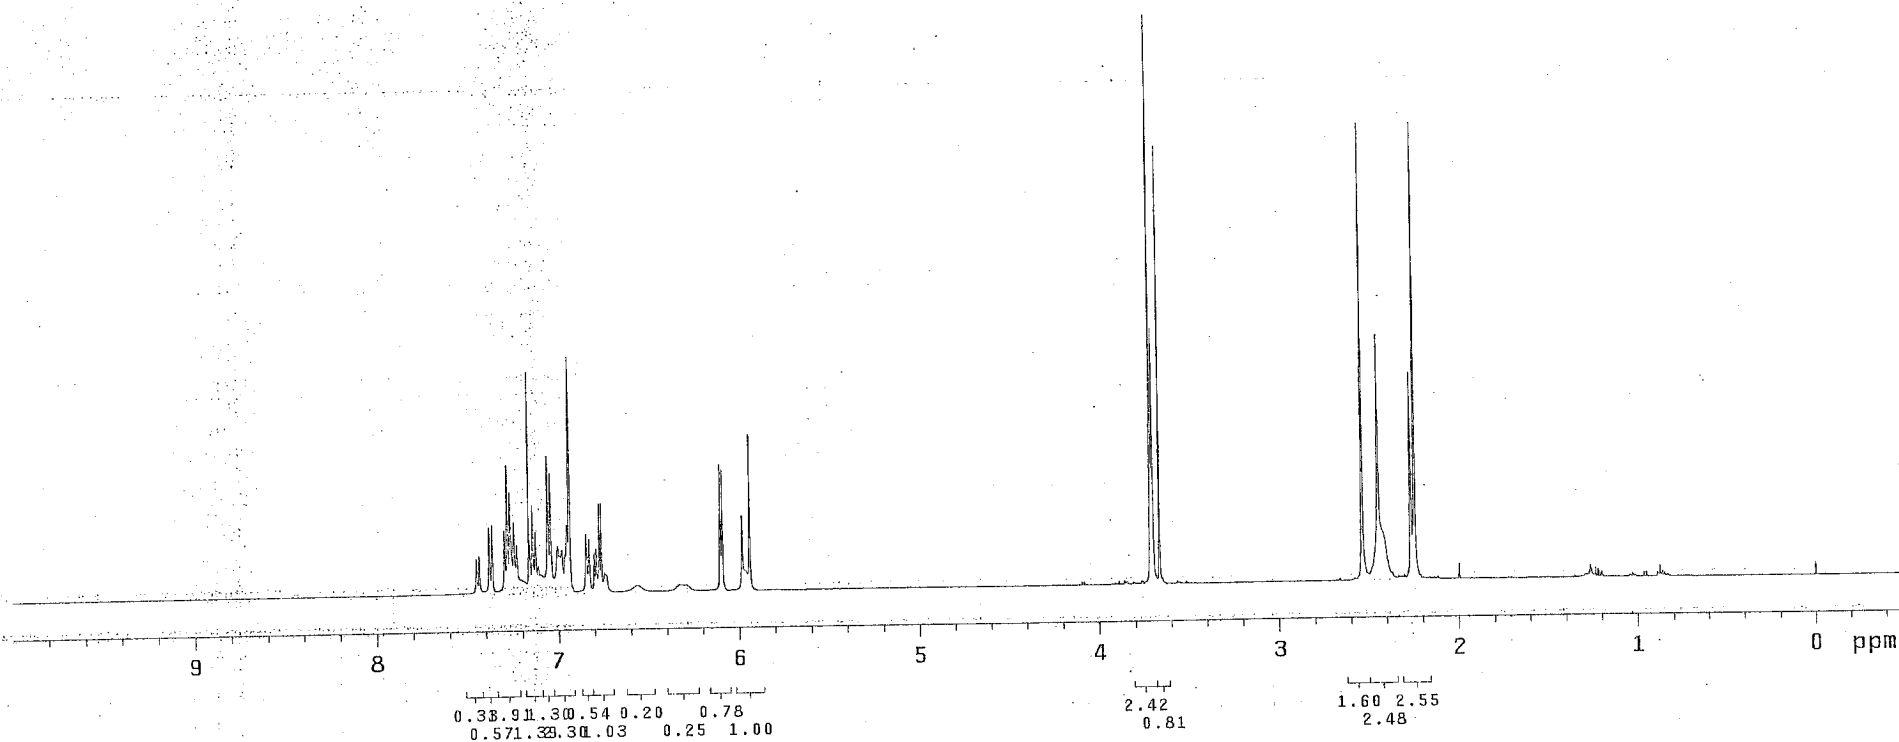

Target (ISCO)

Sample: VRS-6-49A  
Sample ID: s\_20140228\_06  
File: s\_20140228\_06/data/cdc13\_01.

Pulse Sequence: s2pu1

Solvent: cdcl3  
Ambient temperature  
Operator: walkup  
File: cdc13\_01  
VNMR5-500 "NMR500"

Relax. delay 1.000 sec  
Pulse 45.0 degrees  
Acq. time 1.300 sec  
Width 30487.8 Hz  
256 repetitions  
OBSERVE C13, 125.6576499 MHz  
DECOUPLE H1, 499.7341220 MHz  
Power 42 dB  
continuously on  
WALTZ-16 modulated  
DATA PROCESSING  
Line broadening 0.5 Hz  
FT size 131072  
Total time 9 min, 51 sec

# 1-Phenoxy carbonyl-2-(2,4-dimethylphenyl)-3-methoxy-1,2-dihydropyrazine (3j)

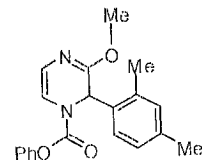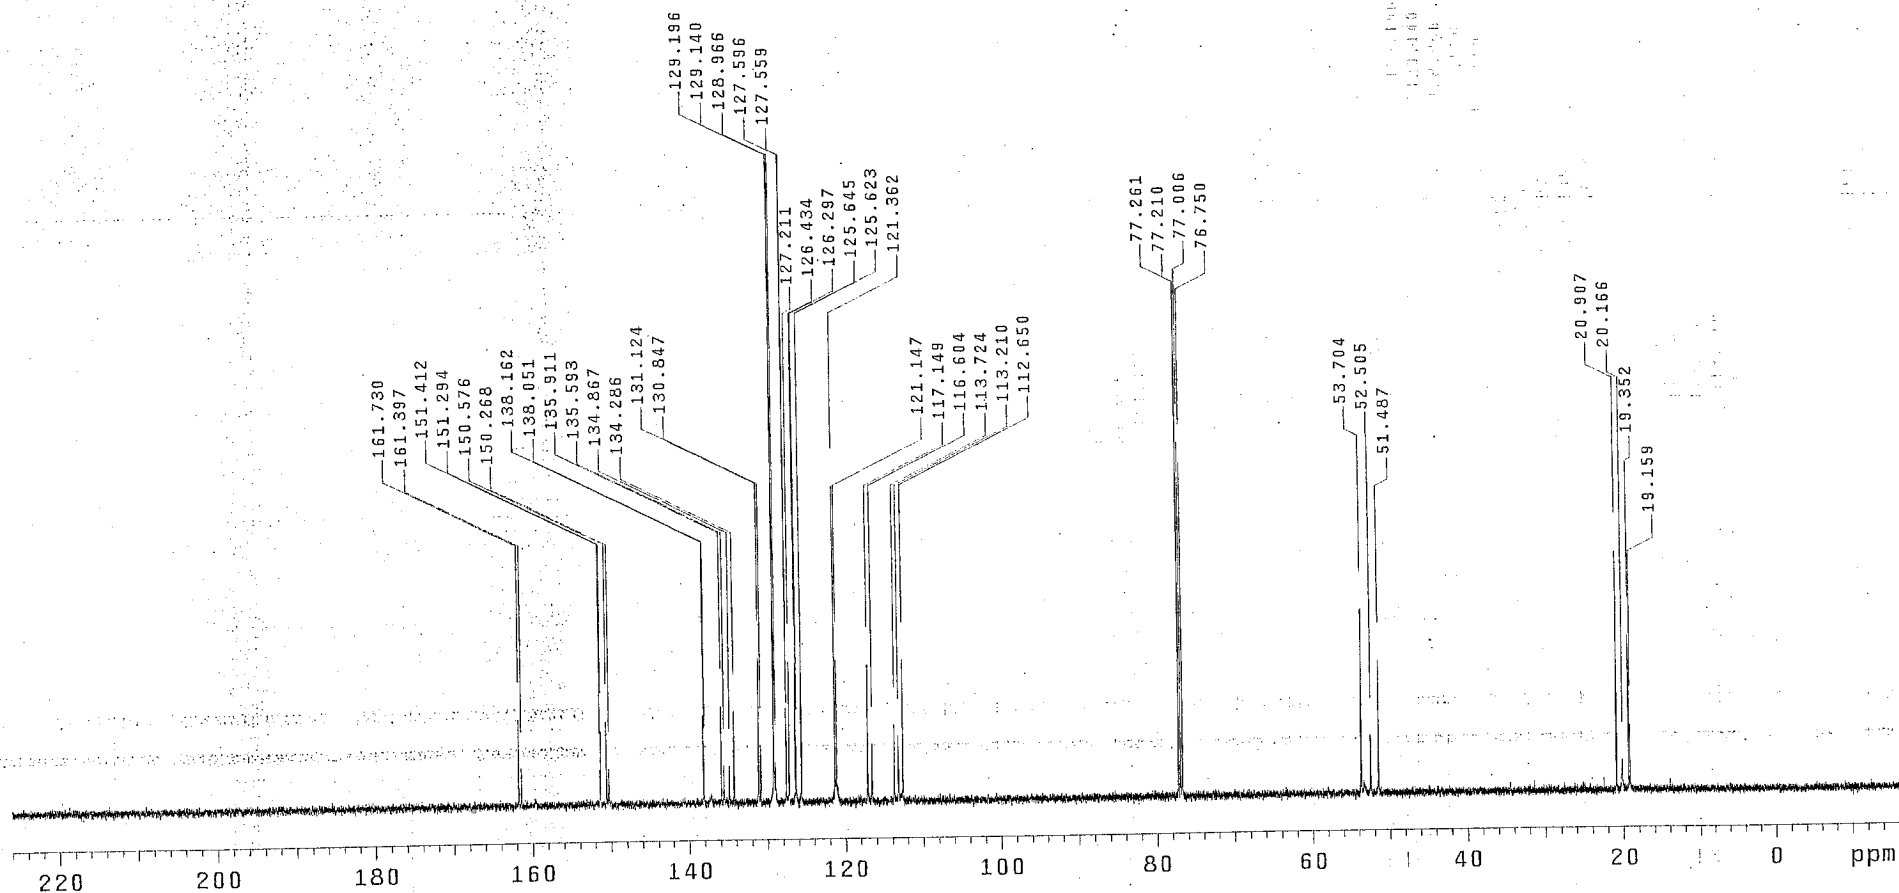

Purified

Sample: VRS-7-113A

Sample ID: s\_20131121\_01

File: /home/walkup/vnmrsys/data/auto\_2012.02.02/s\_20131121\_01/data/cdc13\_01.fid

Pulse Sequence: s2pu1

Solvent: cdcl3

Temp: 26.0 C / 299.1 K

Operator: walkup

File: cdc13\_01

VNMRS-500. "NMR500"

# 1-Phenoxycarbonyl-2-methyl-3-benzyloxy-1,2-dihydropyrazine (4a).

Relax. delay 1.000 sec  
Pulse 45.0 degrees  
Acq. time 2.049 sec  
Width 8012.8 Hz  
8 repetitions  
OBSERVE H1, 499.7316356 MHz  
DATA PROCESSING  
Resol. enhancement -0.0 Hz  
FT size 65536  
Total time 0 min, 31 sec

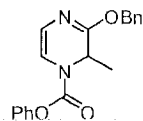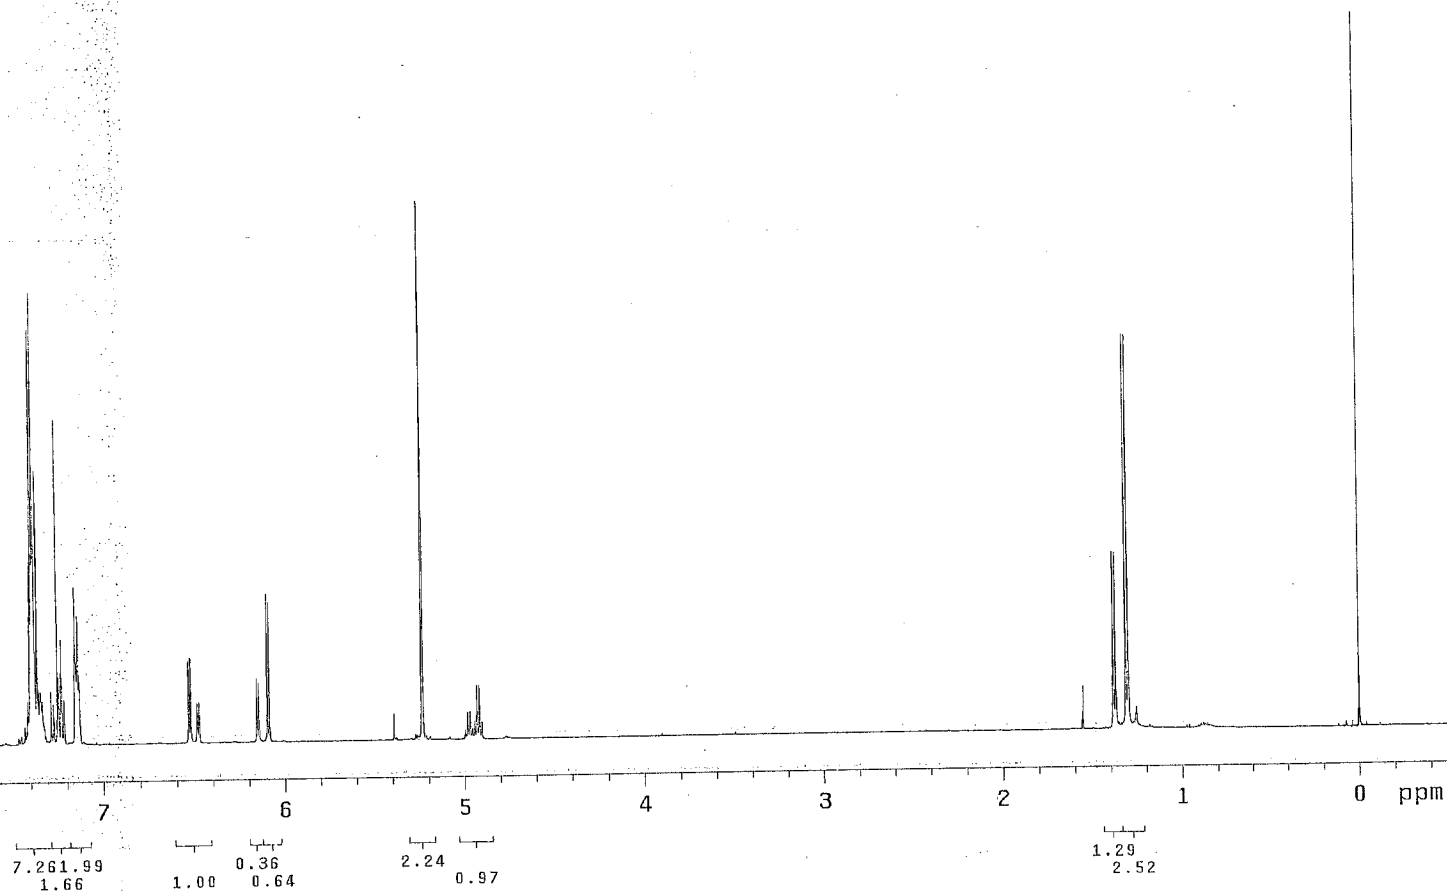

Target

Sample: VRS-7-113A  
Sample ID: s\_20140226\_01  
File: s\_20140226\_01/data/cdc13\_01.f

Pulse Sequence: s2pul

Solvent: cdcl3  
Ambient temperature  
Operator: walkup  
File: cdc13\_01  
VNMRS-500 "NMR500"

Relax. delay 1.000 sec  
Pulse 45.0 degrees  
Acq. time 1.300 sec  
Width 30487.8 Hz  
256 repetitions  
OBSERVE C13, 125.6576318 MHz  
DECOUPLE H1, 499.7341220 MHz  
Power 42 dB  
continuously on.  
WALTZ-16 modulated  
DATA PROCESSING  
Line broadening 0.5 Hz  
FT size 131072  
Total time 9 min, 51 sec

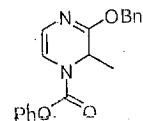

**1-Phenoxycarbonyl-2-methyl-3-benzyloxy-1,2-dihydropyrazine (4a).**

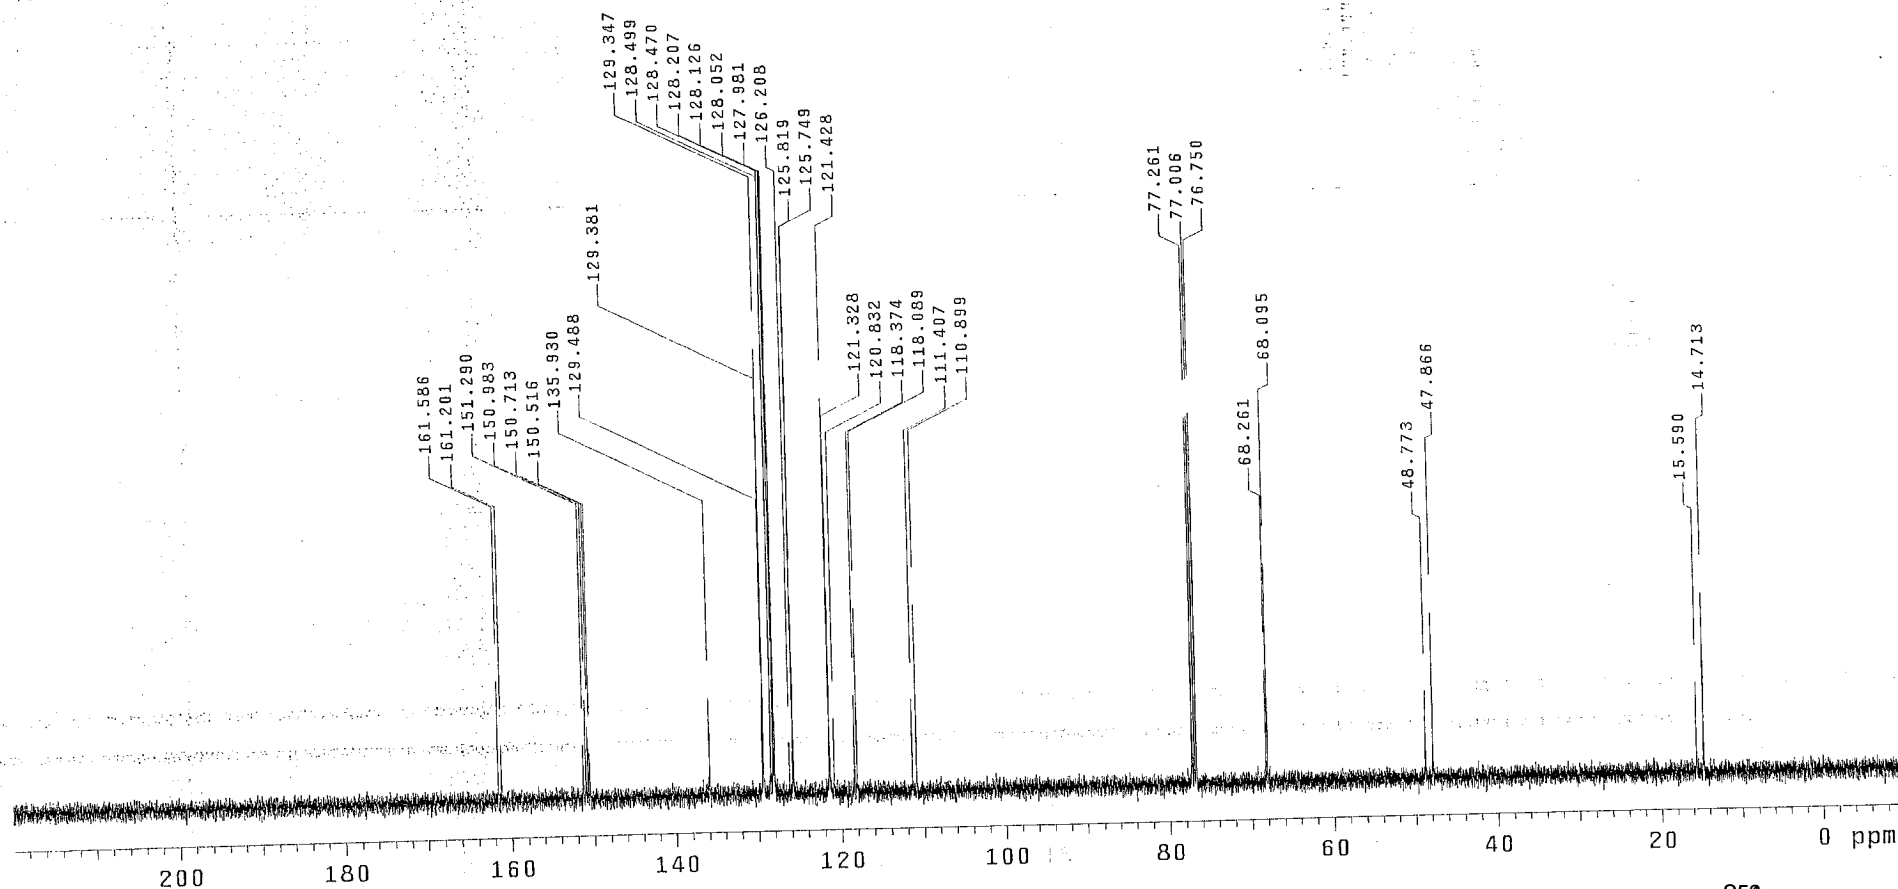

Purified

Sample: VRS-4-98

Sample ID: s\_20140212\_02

File: s\_20140212\_02/data/cdc13\_01.fid

Pulse Sequence: s2pul

Solvent: cdcl3

Temp. 26.0 C / 299.1 K

Operator: walkup

File: cdcl3\_01

VNMRS-500 "NMR500"

Relax. delay 1.000 sec

Pulse 45.0 degrees

Acq. time 2.049 sec

Width 8012.8 Hz

8 repetitions

OBSERVE H1, 499.7316410 MHz

DATA PROCESSING

Resol. enhancement -0.0 Hz

FT size 65536

Total time 0 min, 31 sec

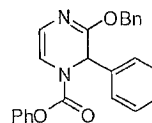

# 1-Phenoxycarbonyl-2-phenyl-3-benzyloxy-1,2-dihydropyrazine (4b)

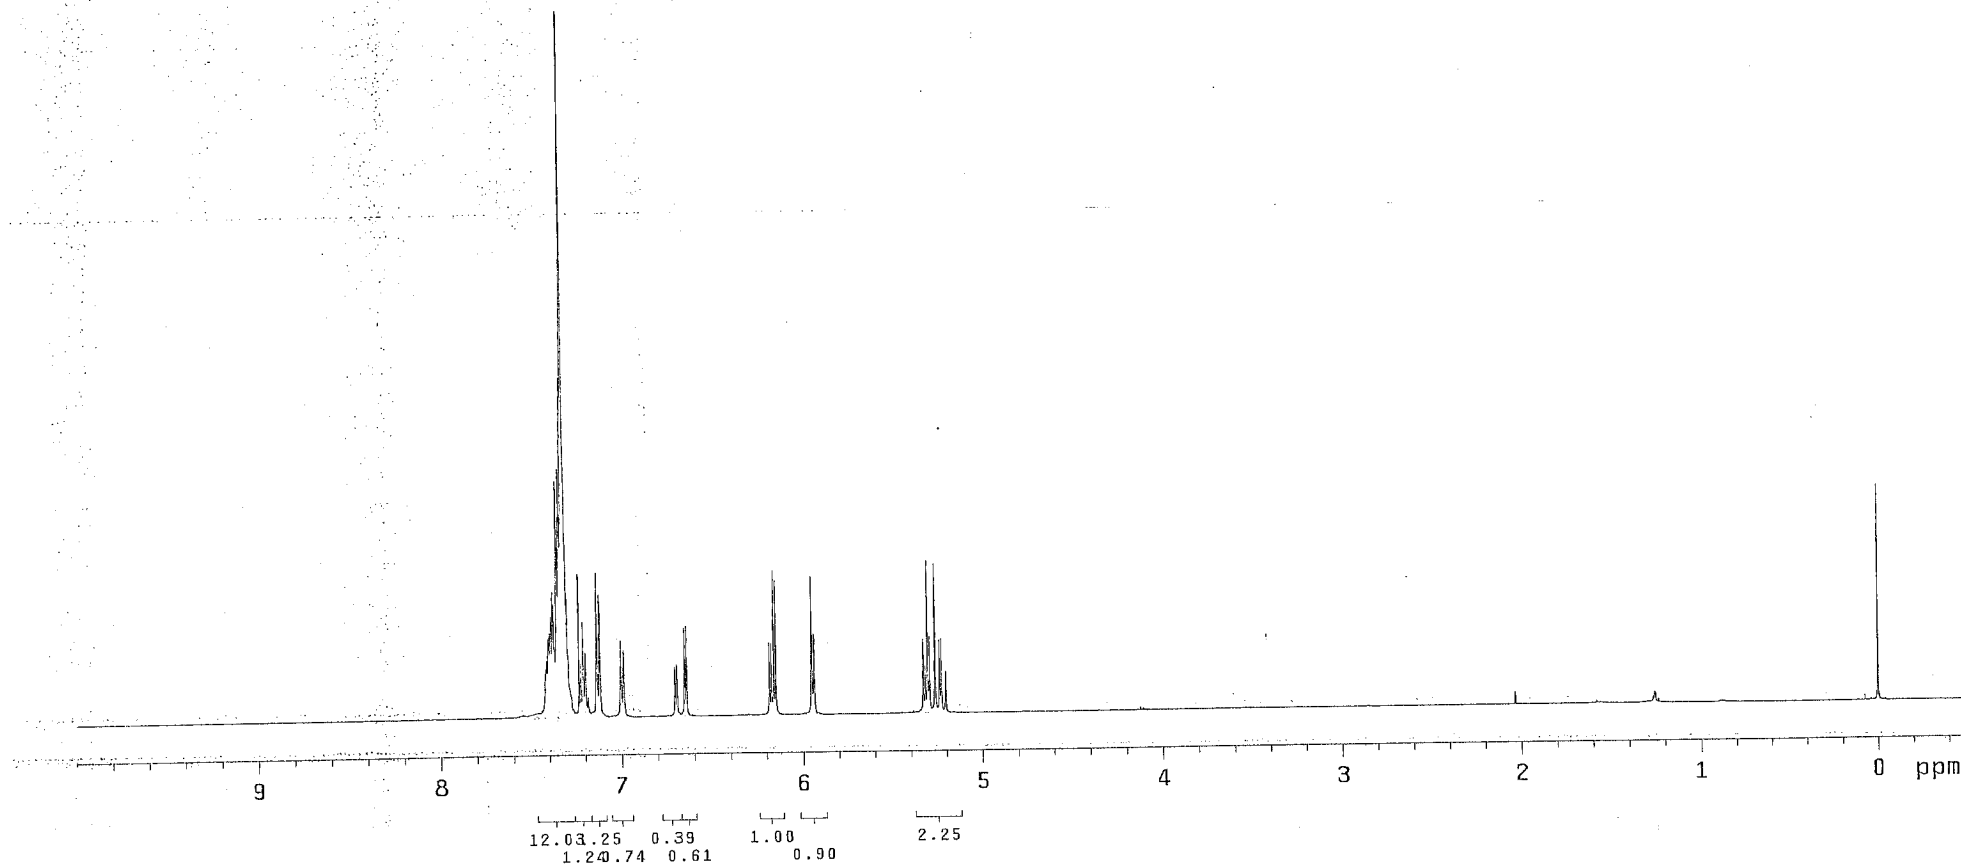

Purified

Sample: VRS-4-98

Sample ID: s\_20140211\_08

File: s\_20140211\_08/data/cdc13\_01.fid

Pulse Sequence: s2pul

Solvent: cdcl3

Temp. 26.0 C / 299.1 K

Operator: walkup

File: cdc13\_01

VNMR5-500 "NMR500"

Relax. delay 1.000 sec

Pulse 45.0 degrees

Acq. time 1.300 sec

Width 30487.8 Hz

256 repetitions

OBSERVE C13, 125.6576166 MHz

DECOUPLE H1, 499.7341220 MHz

Power 42 dB

continuously on

WALTZ-16 modulated

DATA PROCESSING

Line broadening 0.5 Hz

FT size 131072

Total time 9 min, 51 sec

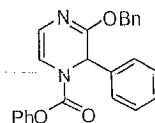

# 1-Phenoxycarbonyl-2-phenyl-3-benzyloxy-1,2-dihydropyrazine (4b)

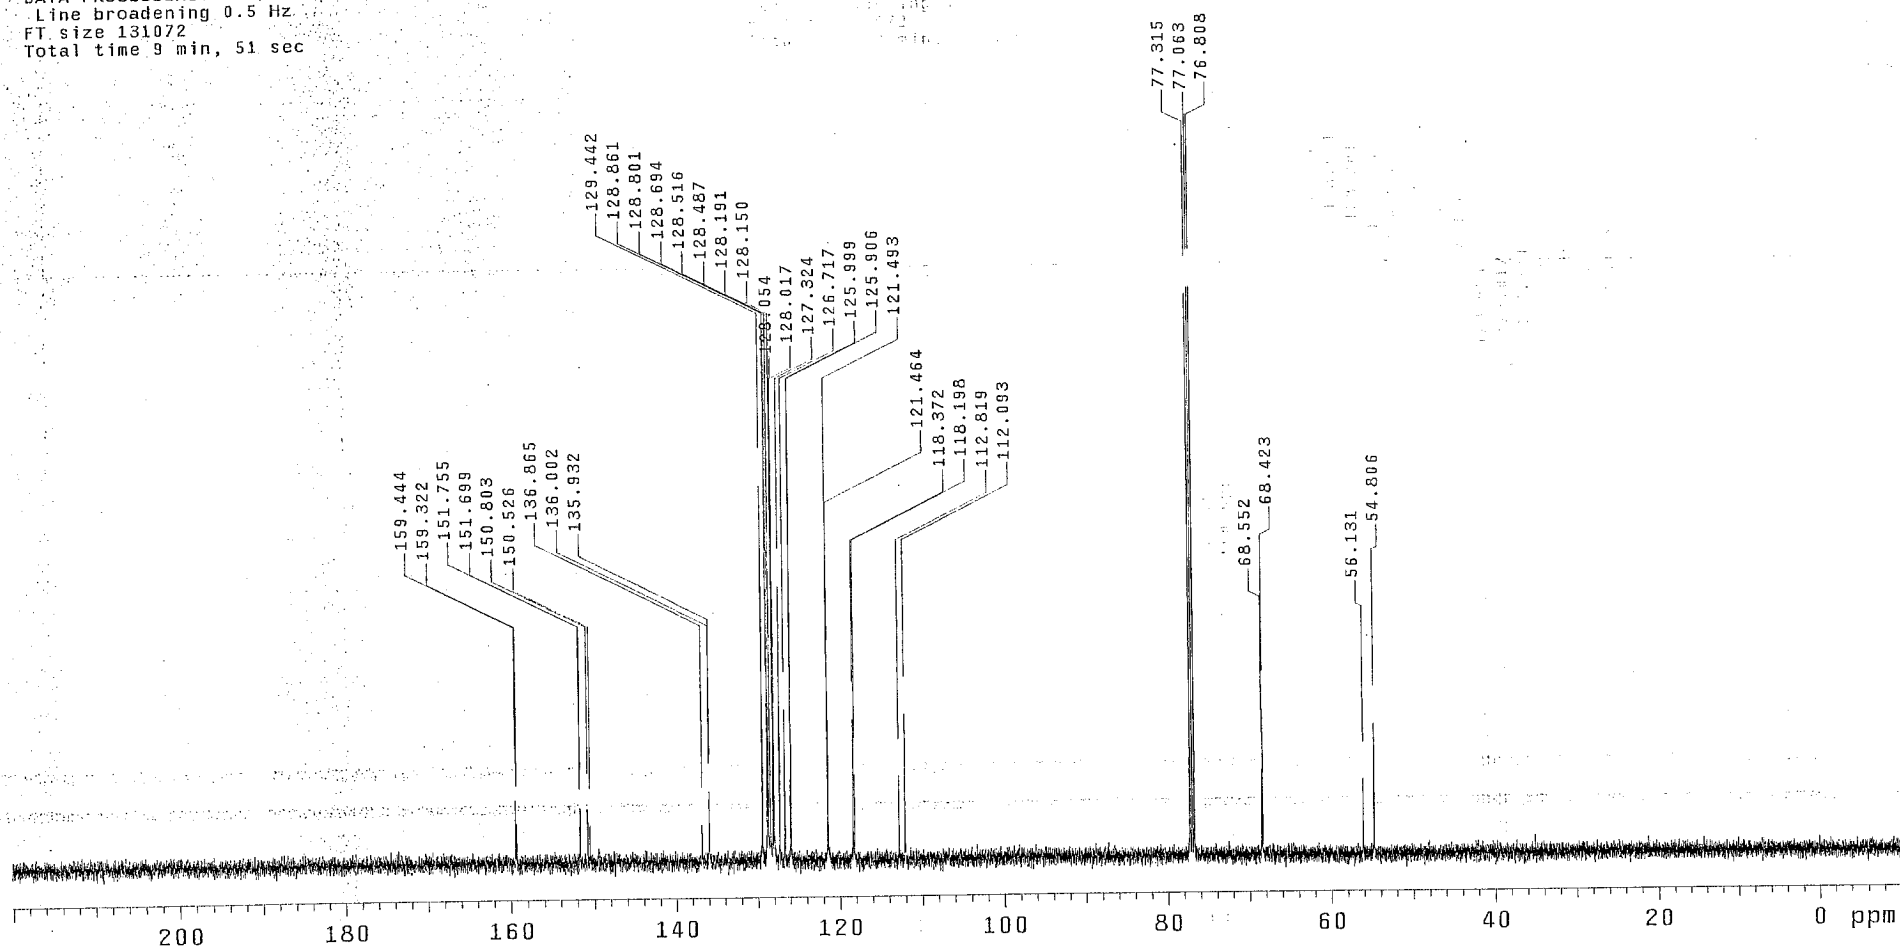

Purified

Sample: WH-1-28 (2)  
Sample ID: s\_20121005\_02  
File: /home/walkup/vnmrsys/1

Pulse Sequence: s2pul  
Solvent: cdcl3  
Temp. 26.0 C / 299.1 K  
Operator: walkup  
File: cdcl3\_01  
VNMRS-500 "NMR500"

Relax. delay 1.000 sec  
Pulse 45.0 degrees  
Acq. time 2.049 sec  
Width 8012.8 Hz  
8 repetitions  
OBSERVE H1, 499.7316370 MHz  
DATA PROCESSING  
Resol. enhancement -0.0 Hz  
FT size 65536  
Total time 0 min, 31 sec

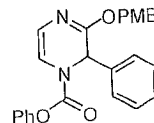

1-Phenoxycarbonyl-2-phenyl-3-(4-methoxybenzyloxy)-1,2-dihydropyrazine (5)

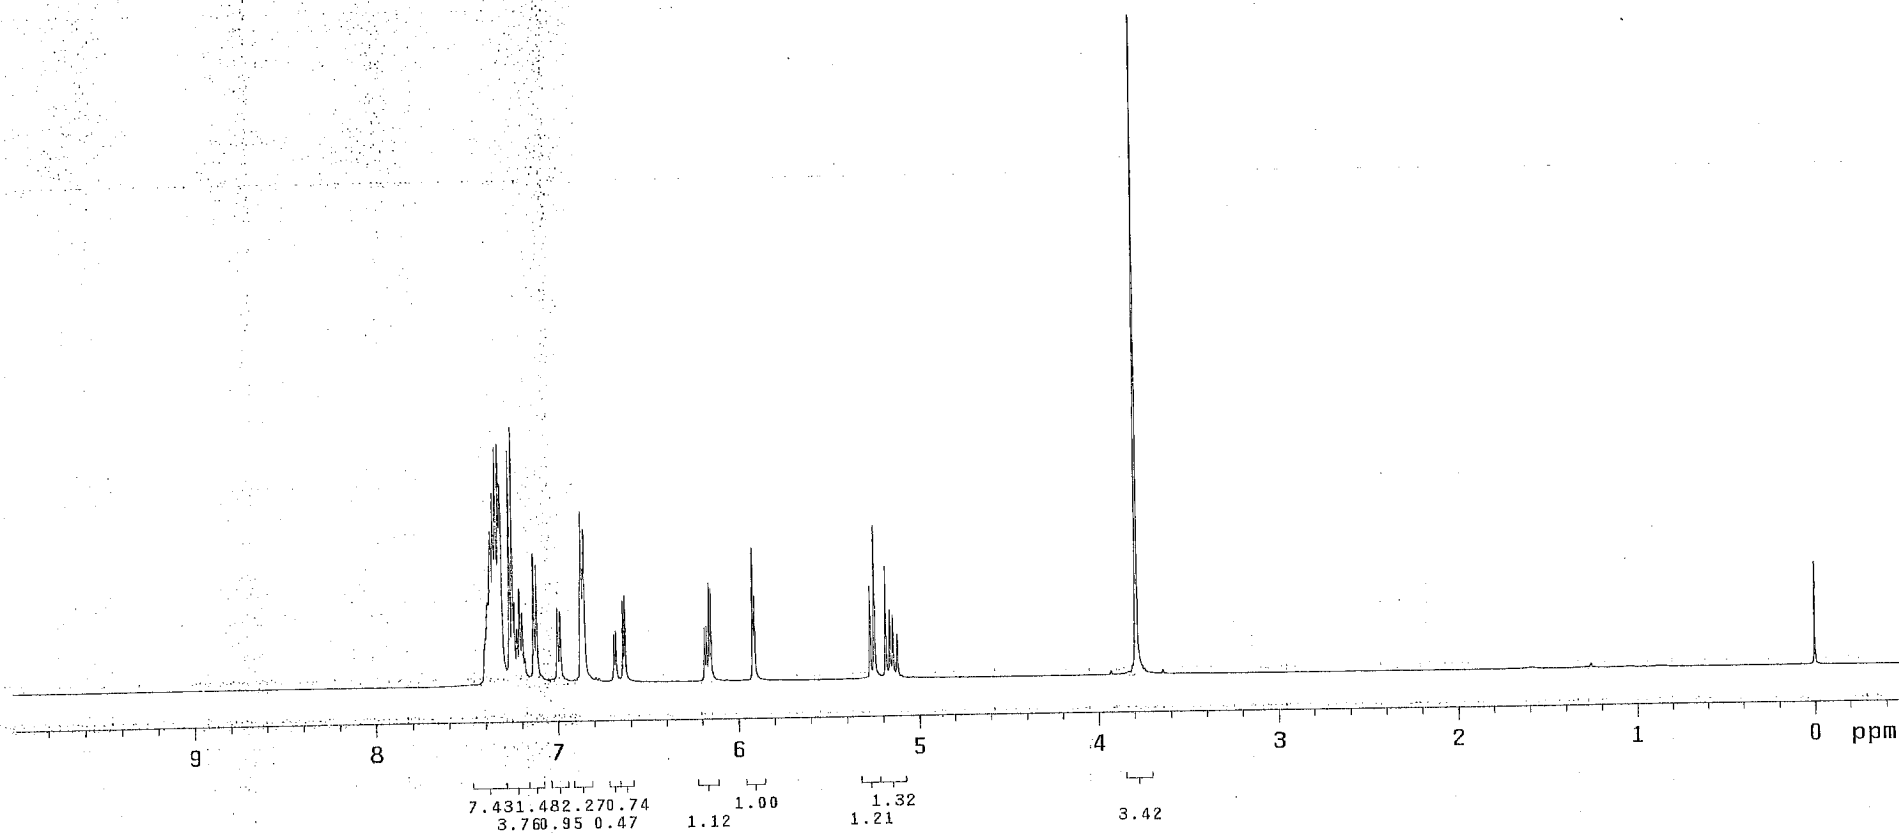



Purified

Sample: WH-1-28 (2)  
Sample ID: s\_20121003\_07  
File: /home/walkup/VaI-NMRs/WH-1-28-

Pulse Sequence: s2pu1

Solvent: cdc13  
Temp. 26.0 C / 299.1 K  
Operator: walkup  
File: WH-1-28-2  
VNMR5-500 "NMR500"

Relax. delay 1.000 sec  
Pulse 45.0 degrees  
Acq. time 1.300 sec  
Width 30487.8 Hz  
7360 repetitions  
OBSERVE C13, 125.6576274 MHz  
DECOUPLE H1, 499.7341220 MHz  
Power 42 dB  
continuously on  
WALTZ-16 modulated  
DATA PROCESSING  
Line broadening 0.5 Hz  
FT size 131072  
Total time 16 hr, 25 min, 21 sec

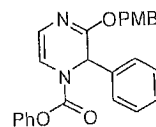

# 1-Phenoxycarbonyl-2-phenyl-3-(4-methoxybenzyloxy)-1,2-dihydropyrazine (5)

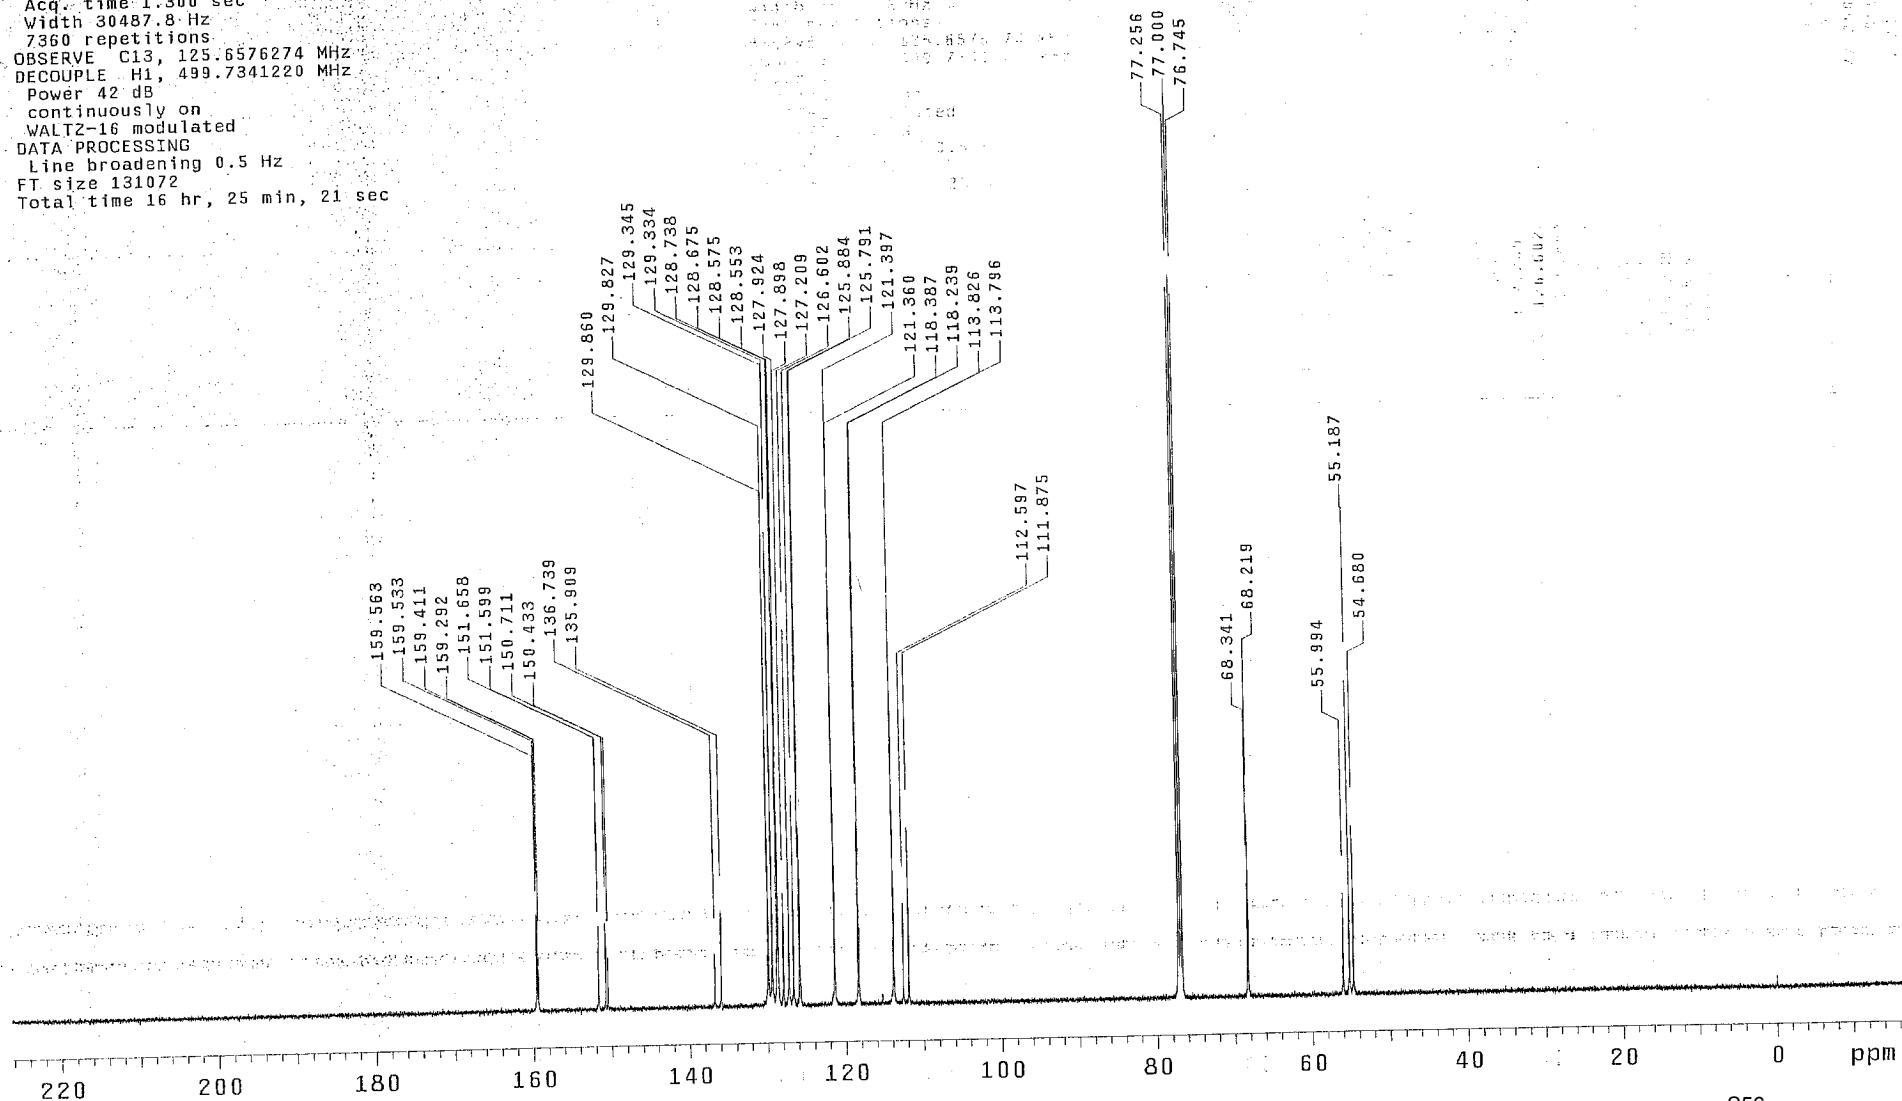

Purify

Sample: VRS-6-123a  
Sample ID: s\_20121025\_06  
File: /home/walkup/vnmrsys/data/al

Pulse Sequence: s2pul

Solvent: cdcl3  
Temp. 26.0 C / 299.1 K  
Operator: walkup  
File: cdcl3\_01  
VNMR5-500 "NMR500"

Relax. delay 1.000 sec  
Pulse 45.0 degrees  
Acq. time 2.049 sec  
Width 8012.8 Hz  
8 repetitions  
OBSERVE H1, 499.7316436 MHz  
DATA PROCESSING  
Resol. enhancement -0.0 Hz  
FT size 65536  
Total time 0 min, 31 sec

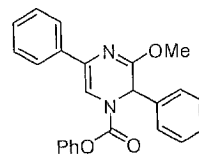

**1-Phenoxycarbonyl-2,5-diphenyl-3-methoxy-1,2-dihydropyrazine (6)**

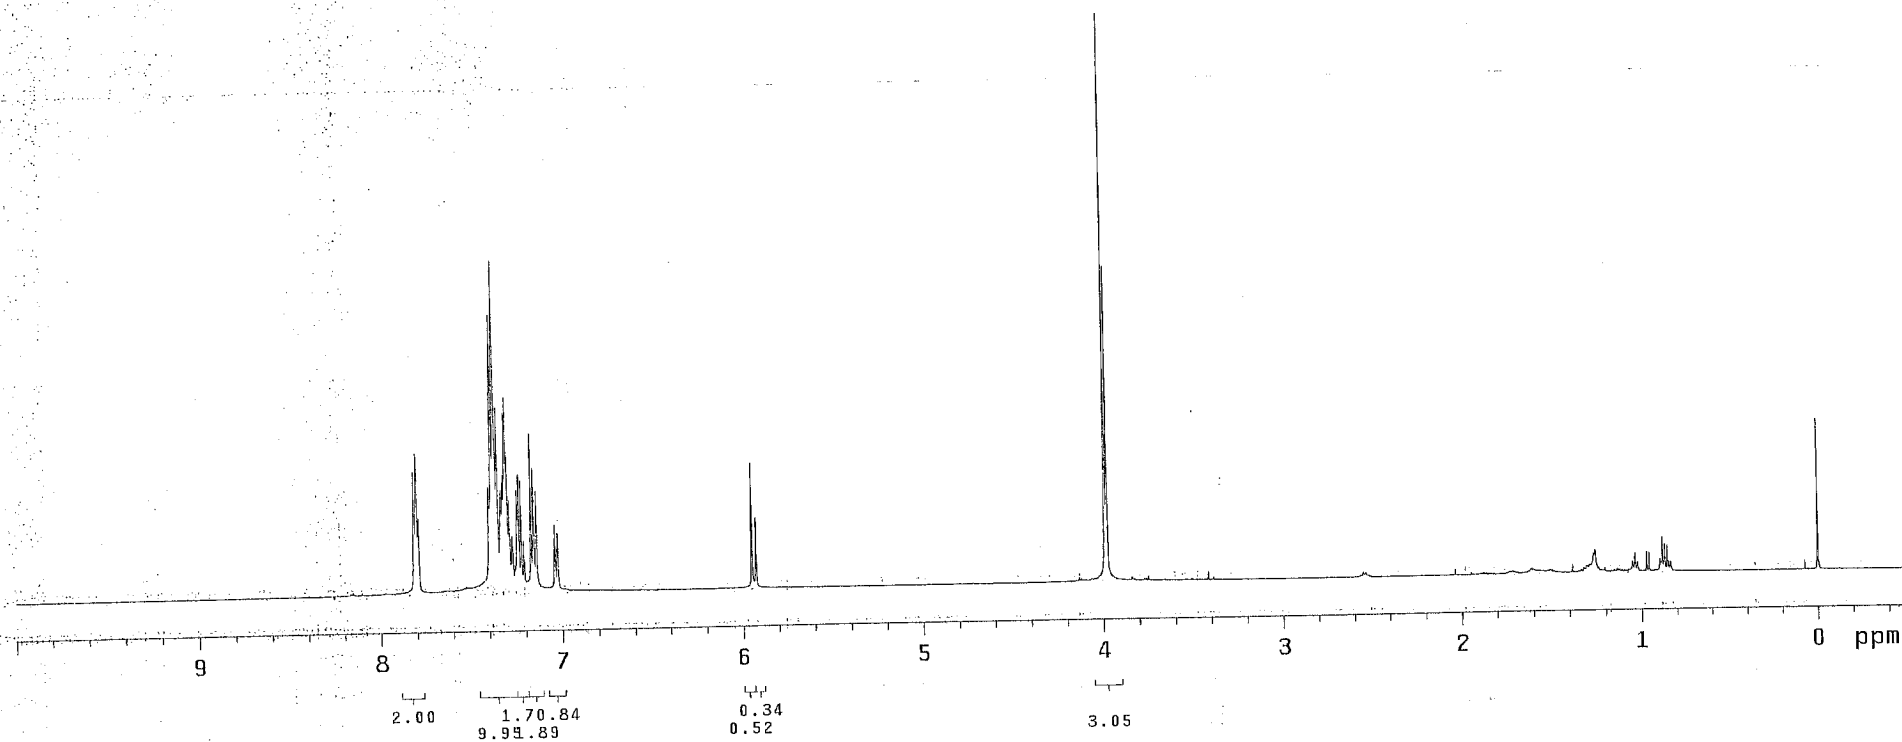

Target

Sample: VRS-6-123A  
Sample ID: s\_20140217\_04  
File: s\_20140217\_04/data/cdcl3\_01.fid

Pulse Sequence: s2pu1

Solvent: cdcl3  
Temp. 26.0 C / 299.1 K  
Operator: walkup  
File: cdcl3\_01  
VNMR5-500 "NMR500"

Relax. delay 1.000 sec  
Pulse 45.0 degrees  
Acq. time 1.300 sec  
Width 30487.8 Hz  
256 repetitions  
OBSERVE C13, 125.6576533 MHz  
DECOUPLE H1, 499.7341220 MHz  
Power 42 dB  
continuously on  
WALTZ-16 modulated  
DATA PROCESSING  
Line broadening 0.5 Hz  
FT size 131072  
Total time 9 min, 51 sec

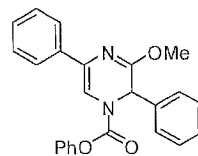

1-Phenoxycarbonyl-2,5-diphenyl-3-methoxy-1,2-dihydropyrazine (6)

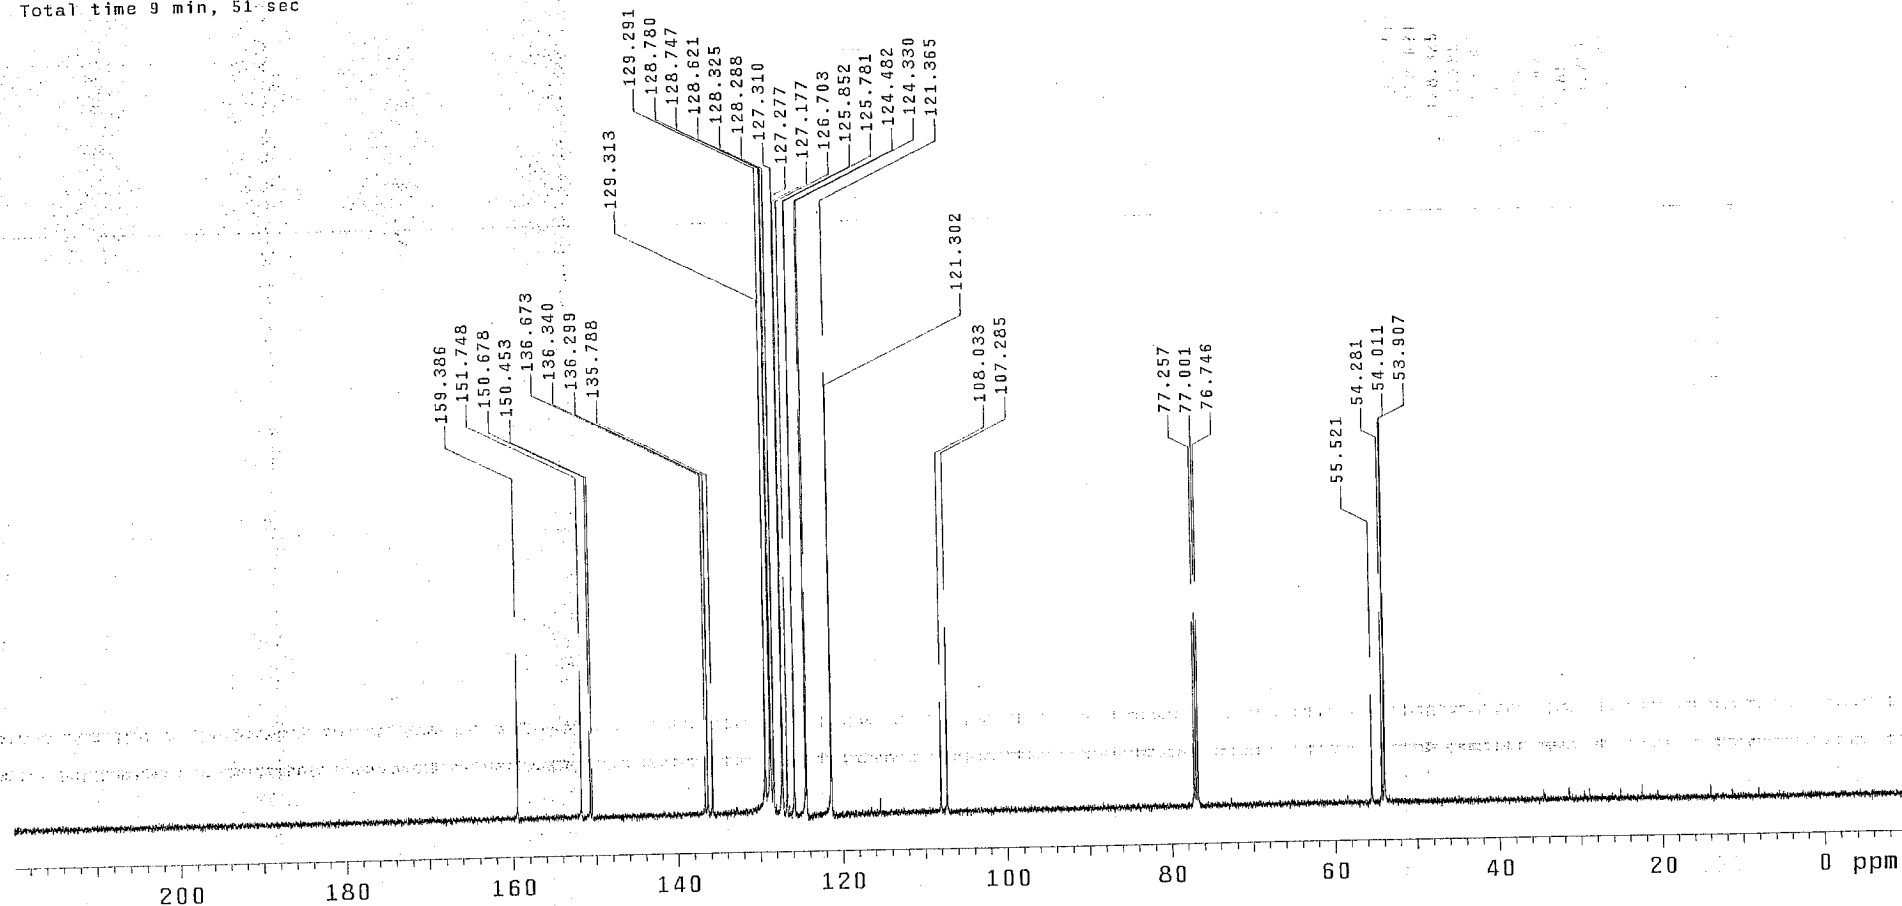

Target for ID

Sample: VRS-6-126A  
Sample ID: s\_20140220\_01  
File: s\_20140220\_01/data/cd

Pulse Sequence: s2pul

Solvent: cdcl3  
Ambient temperature  
Operator: walkup  
File: cdcl3\_01  
VNMR5-500 "NMR500"

Relax. delay 1.000 sec  
Pulse 45.0 degrees  
Acq. time 2.049 sec  
Width 8012.8 Hz  
8 repetitions  
OBSERVE H1, 499.7316314 MHz  
DATA PROCESSING  
Resol. enhancement -0.0 Hz  
FT size 65536  
Total time 0 min, 31 sec

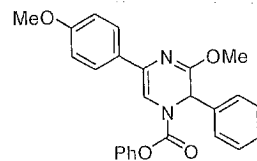

**1-Phenoxycarbonyl-2-phenyl-3-methoxy-5-(4-methoxyphenyl)-1,2-dihydropyrazine (7a)**

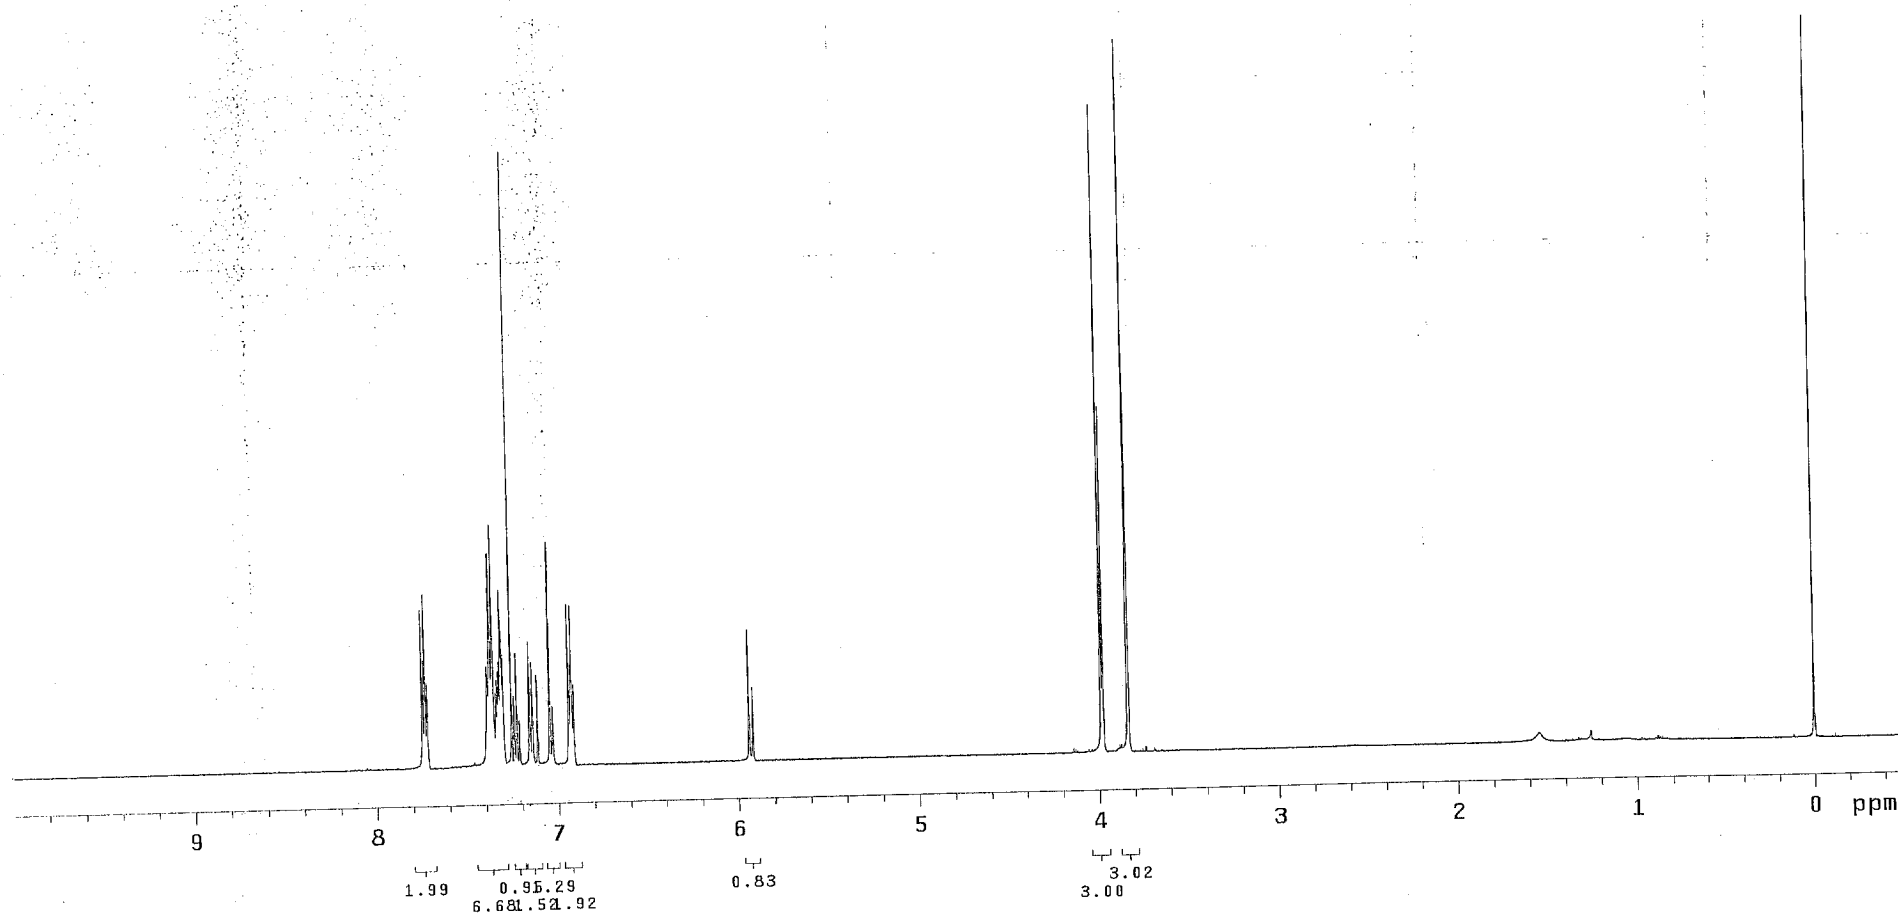

# 1-Phenoxycarbonyl-2-phenyl-3-methoxy-5-(4-methoxyphenyl)-1,2-dihydropyrazine (7a)

Target

Sample: VRS-6-126A  
File: exp

Pulse Sequence: s2pul

Solvent: cdcl3  
Ambient temperature  
Operator: walkup  
VNMR5-500 "NMR500"

Relax. delay 1.000 sec  
Pulse 45.0 degrees  
Acq. time 1.300 sec  
Width 30487.8 Hz  
1856 repetitions  
OBSERVE C13, 125.6576166 MHz  
DECOUPLE H1, 499.7341220 MHz  
Power 42 dB  
continuously on  
WALTZ-16 modulated  
DATA PROCESSING  
Line broadening 0.5 Hz  
FT size 131072  
Total time 16 hr, 25 min, 21 sec

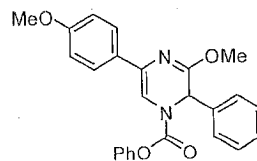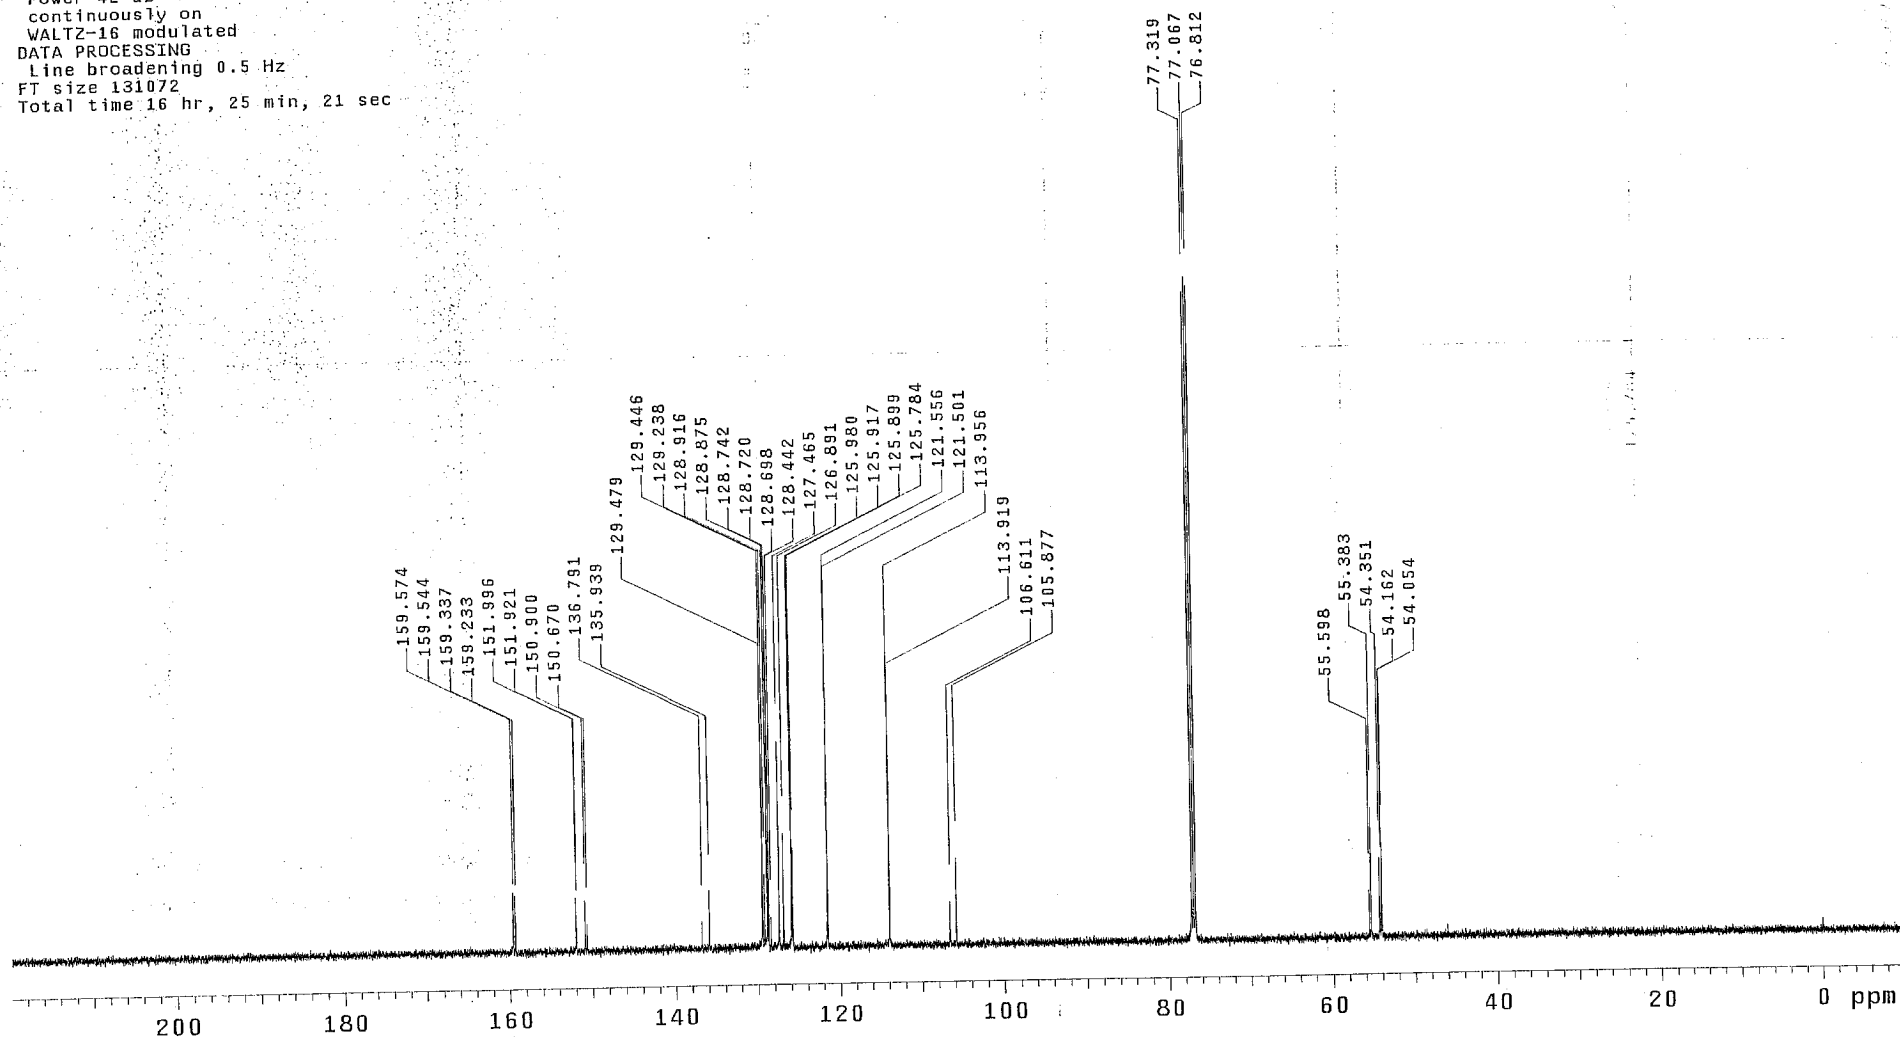

Purified

Sample: VRS-7-125B  
Sample ID: s\_20140531\_01  
File: s\_20140531\_01/data/cdcl3\_0

Pulse Sequence: s2pu1  
Solvent: cdcl3  
Temp. 26.0 C / 299.1 K  
Operator: walkup  
File: cdcl3\_01  
VNMR5-500 "NMR500"

Relax. delay 1.000 sec  
Pulse 45.0 degrees  
Acq. time 2.049 sec  
Width 8012.8 Hz  
8 repetitions  
OBSERVE H1, 499.7316334 MHz  
DATA PROCESSING  
Resol. enhancement -0.0 Hz  
FT size 65536  
Total time 0 min, 31 sec

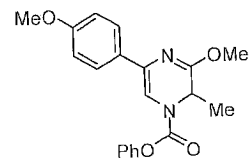

# 1-Phenoxycarbonyl-2-methyl-3-methoxy-5-(4-methoxyphenyl)-1,2-dihydropyrazine (7b)

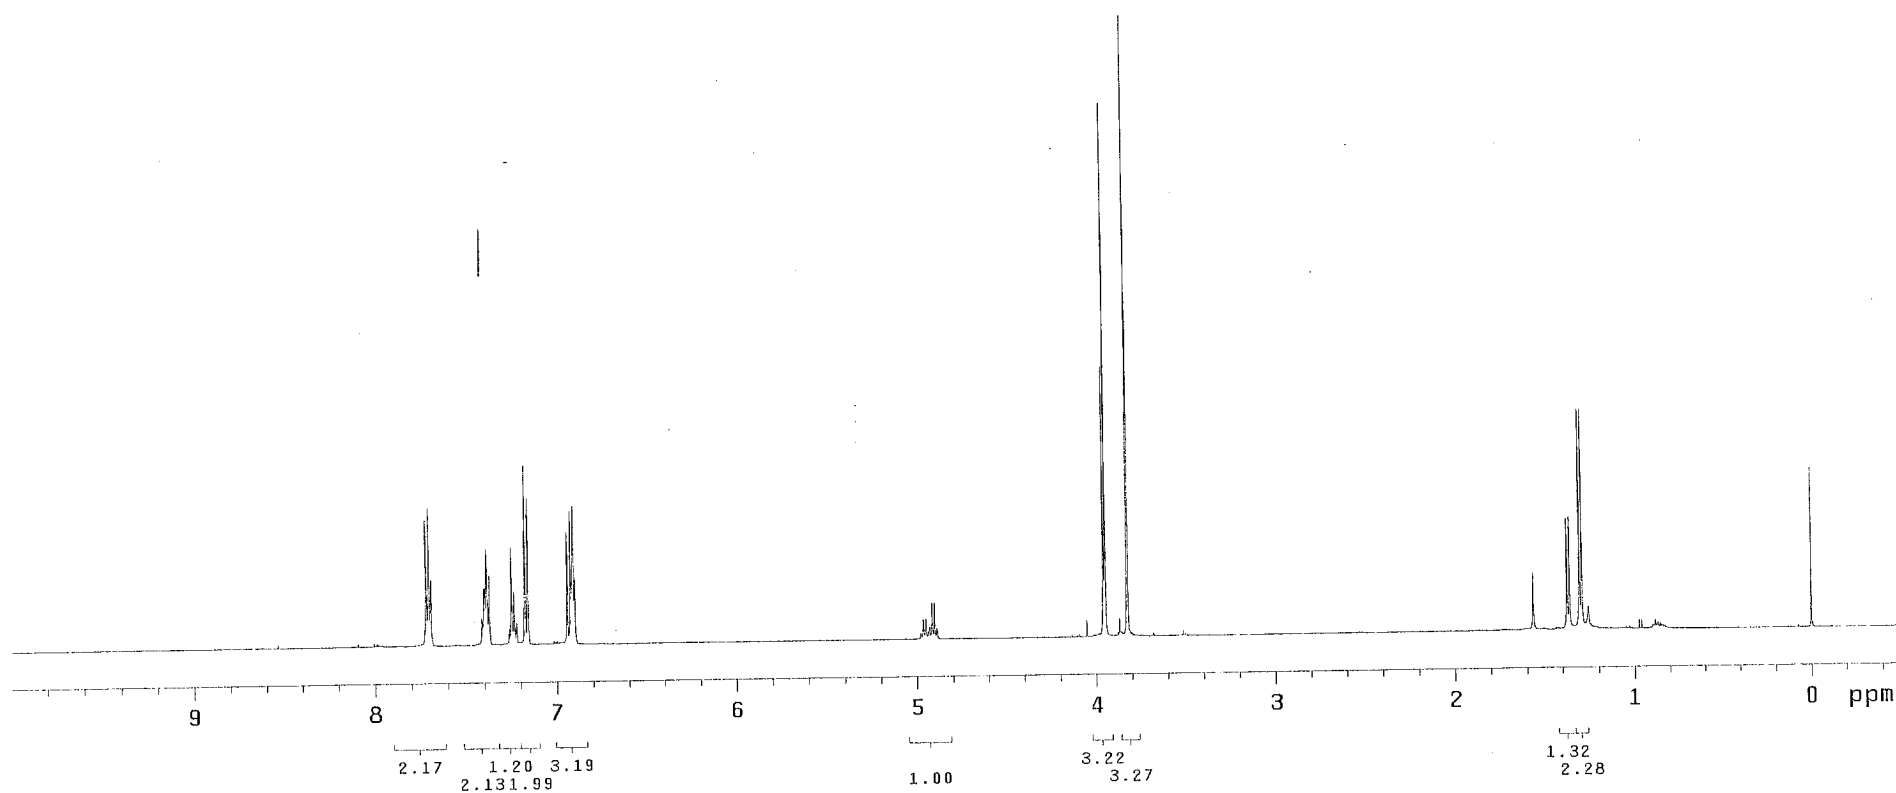

# 1-Phenoxycarbonyl-2-methyl-3-methoxy-5-(4-methoxyphenyl)-1,2-dihydropyrazine (7b)

Purified

Sample: VRS-7-125B  
File: exp

Pulse Sequence: s2pu1

Solvent: cdcl3  
Temp. 26.0 C / 299.1 K  
Operator: walkup  
VNMR5-500 "NMR500"

Relax. delay 1.000 sec  
Pulse 45.0 degrees  
Acq. time 1.300 sec  
Width 30487.8 Hz  
10112 repetitions  
OBSERVE C13, 125.6576196 MHz  
DECOUPLE H1, 499.7341220 MHz  
Power 42 dB  
continuously on  
WALTZ-16 modulated  
DATA PROCESSING  
Line broadening 0.5 Hz  
FT size 131072  
Total time 16 hr, 25 min, 21 sec

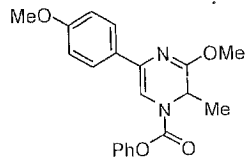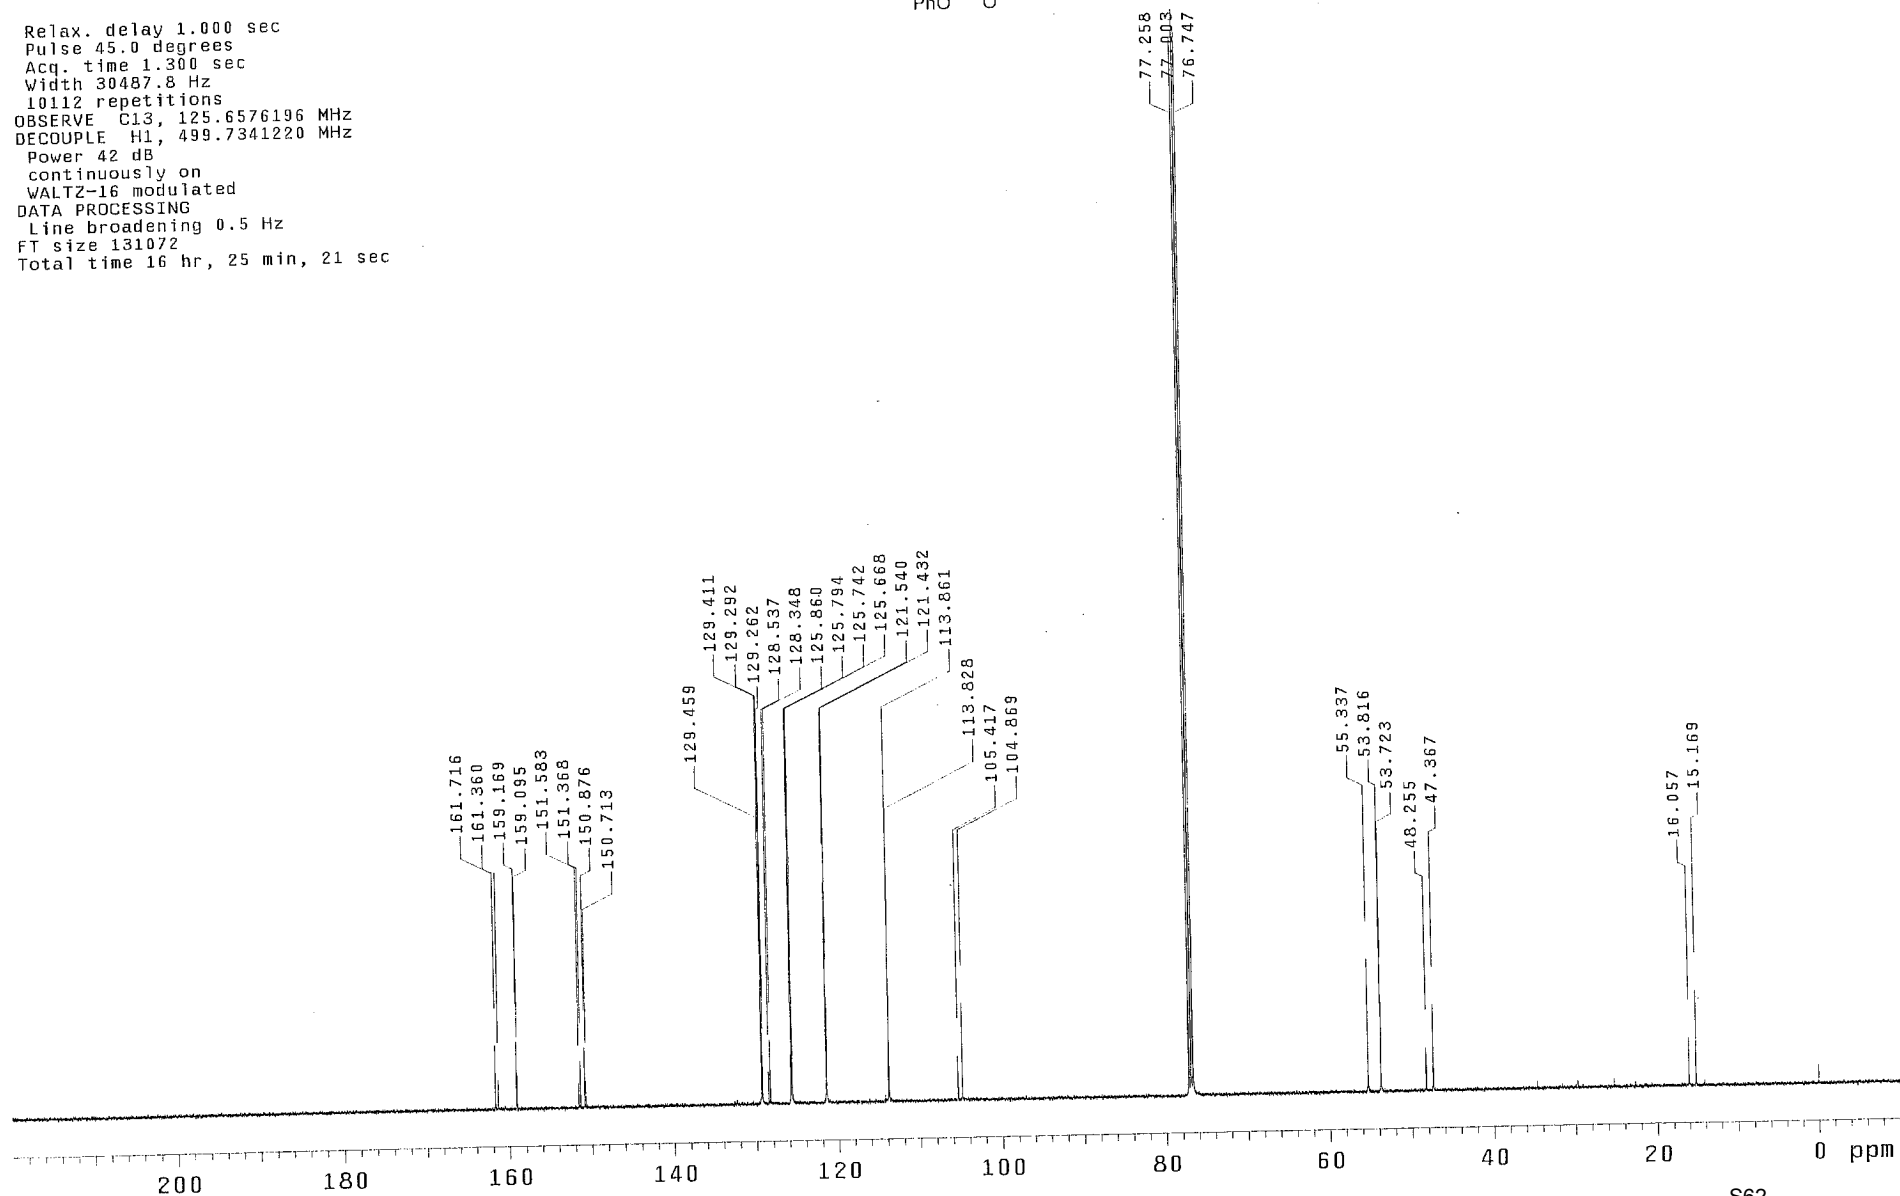

Purified

Sample: VRS-6-108  
Sample ID: s\_20140416\_05  
File: s\_20140416\_05/data/cdc13\_01.fid

Pulse Sequence: s2pul

Solvent: cdcl3  
Ambient temperature  
Operator: walkup  
File: cdc13\_01  
VNMR5-500 "NMR500"

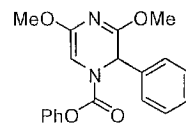

### 1-Phenoxycarbonyl-2-phenyl-3,5-dimethoxy-1,2-dihydropyrazine (8)

Relax. delay 1.000 sec  
Pulse 45.0 degrees  
Acq. time 2.049 sec  
Width 8012.8 Hz  
8 repetitions  
OBSERVE H1, 499.7316392 MHz  
DATA PROCESSING  
Resol. enhancement -0.0 Hz  
FT size 65536  
Total time 0 min, 31 sec

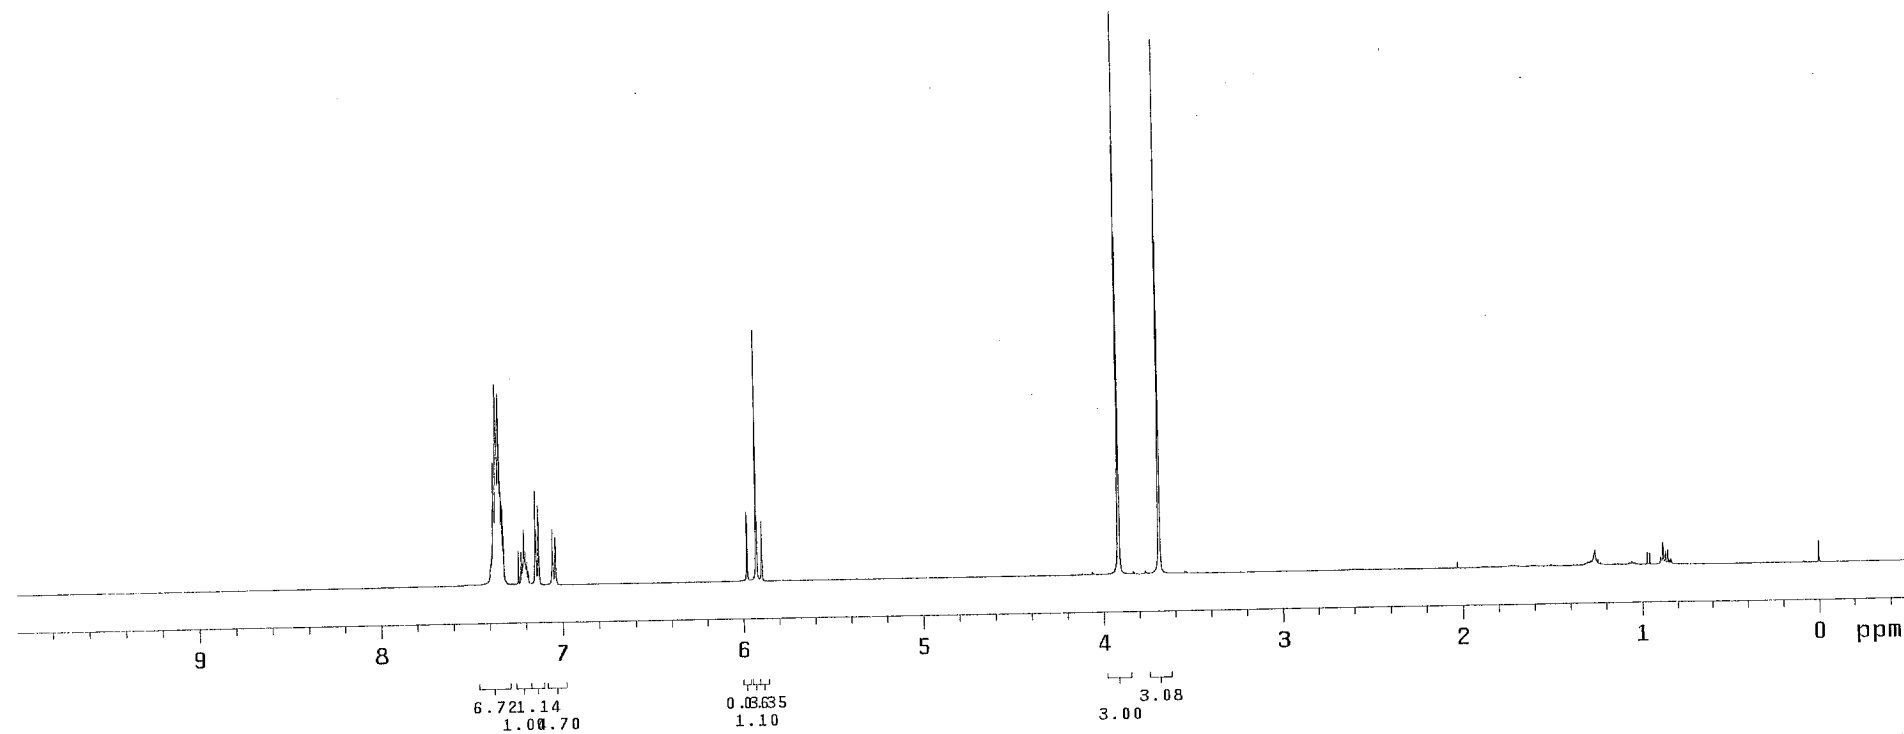



Purified

Sample: VRS-6-108  
Sample ID: s\_20140416\_04  
File: s\_20140416\_04/data/cdc13\_01.fid

Pulse Sequence: s2pul

Solvent: cdc13  
Ambient temperature  
Operator: walkup  
File: cdc13\_01  
VNMR5-500 "NMR500"

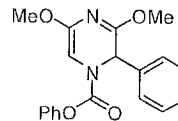

### 1-Phenoxycarbonyl-2-phenyl-3,5-dimethoxy-1,2-dihydropyrazine (8)

Relax. delay 1.000 sec  
Pulse 45.0 degrees  
Acq. time 1.300 sec  
Width 30487.8 Hz  
256 repetitions  
OBSERVE C13, 125.6576335 MHz  
DECOUPLE H1, 499.7341220 MHz  
Power 42 dB  
continuously on  
WALTZ-16 modulated  
DATA PROCESSING  
Line broadening 0.5 Hz  
FT size 131072  
Total time 9 min, 51 sec

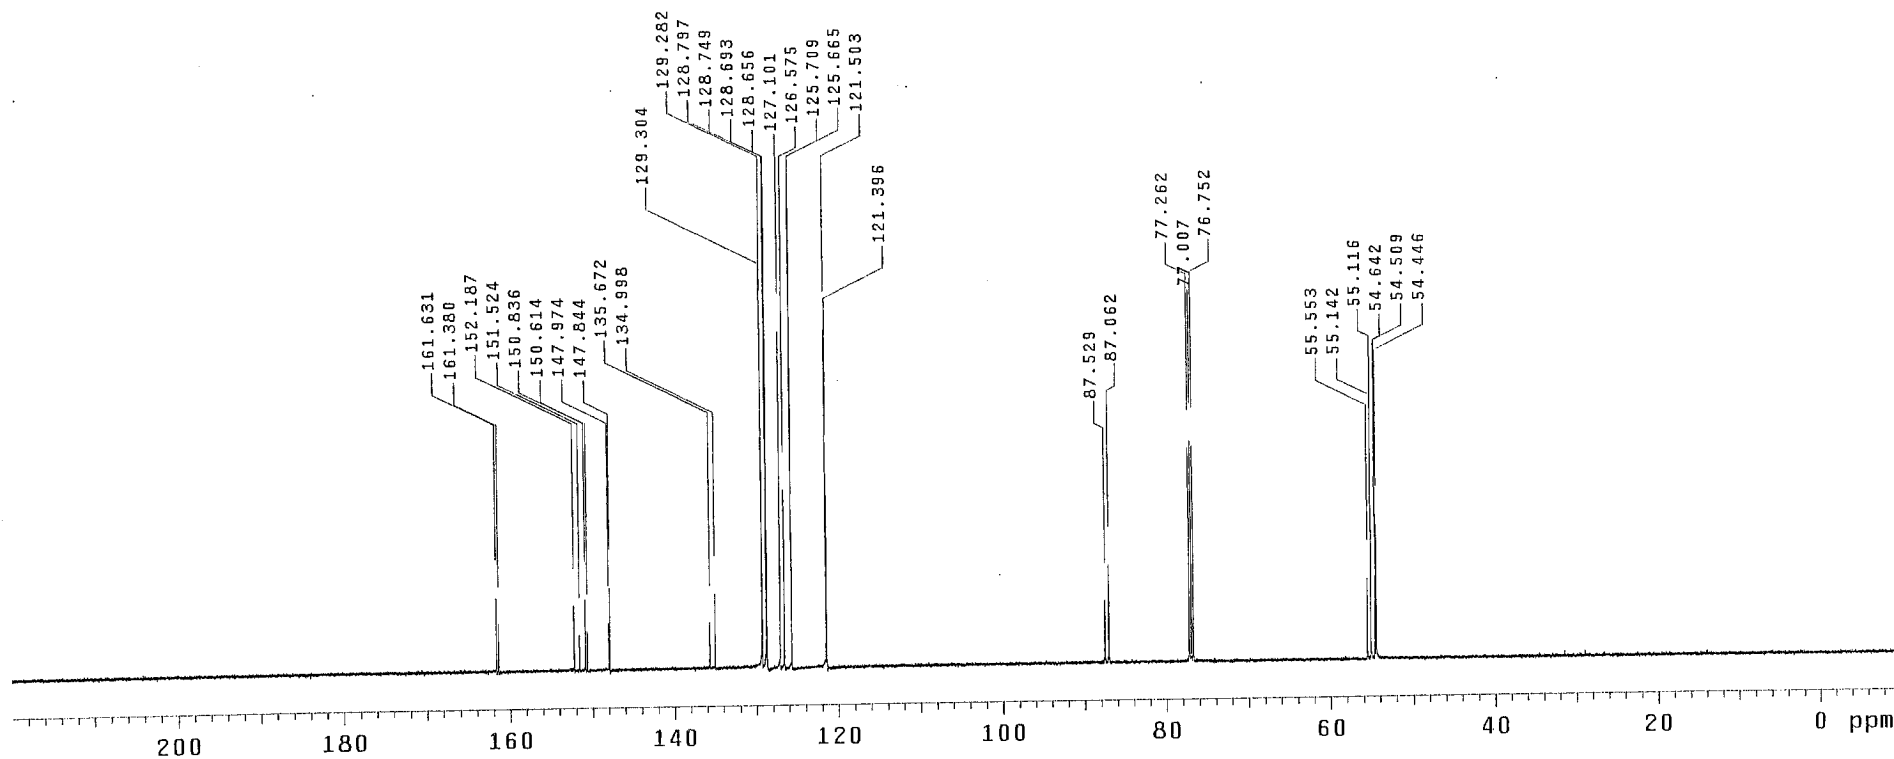

Purified

Sample: VRS-6-133

Sample ID: s\_20121214\_06

File: /home/walkup/vnmrsys/data/auto\_2012.02.02/s\_20121214\_06/data/cdc13\_01.fid

Pulse Sequence: s2pul

Solvent: cdc13

Temp. 26.0 C / 299.1 K

Operator: walkup

File: cdc13\_01

VNMR5-500 "NMR500"

Relax. delay 1.000 sec

Pulse 45.0 degrees

Acq. time 2.049 sec

Width 8012.8 Hz

8 repetitions

OBSERVE H1, 499.7316659 MHz

DATA PROCESSING

Resol. enhancement -0.0 Hz

FT size 65536

Total time 0 min, 31 sec

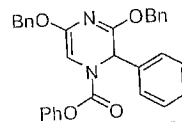

### 1-Phenoxycarbonyl-2-phenyl-3,5-dibenzyloxy-1,2-dihydropyrazine (9a)

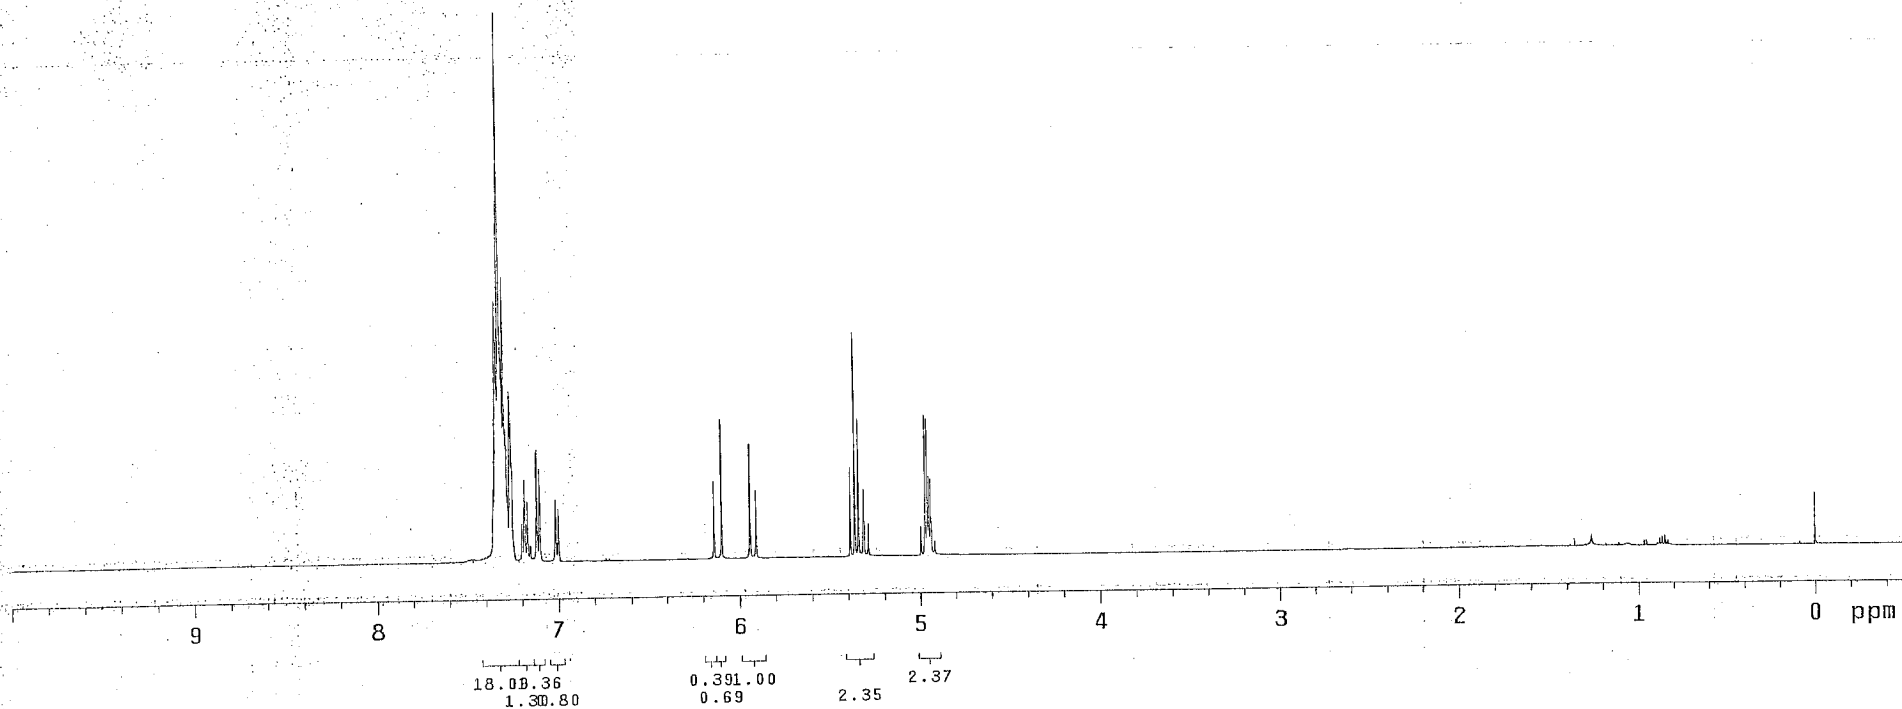

# 1-Phenoxy carbonyl-2-phenyl-3,5-dibenzyloxy-1,2-dihydropyrazine (9a)

Purified

Sample: VRS-6-133  
Sample ID: s\_20121214\_07  
File: /home/walkup/vnmrsv/

Pulse Sequence: s2pul

Solvent: cdcl3  
Temp: 26.0 C / 299.1 K  
Operator: walkup  
File: cdcl3\_01  
VNMR5-500 "NMR500"

Relax. delay 1.000 sec  
Pulse 45.0 degrees  
Acq. time 1.300 sec  
Width 30487.8 Hz  
256 repetitions  
OBSERVE C13, 125.6576349 MHz  
DECOUPLE H1, 499.7341220 MHz  
Power 42 dB  
continuously on  
WALTZ-16 modulated  
DATA PROCESSING  
Line broadening 0.5 Hz  
FT size 131072  
Total time 9 min, 51 sec

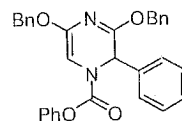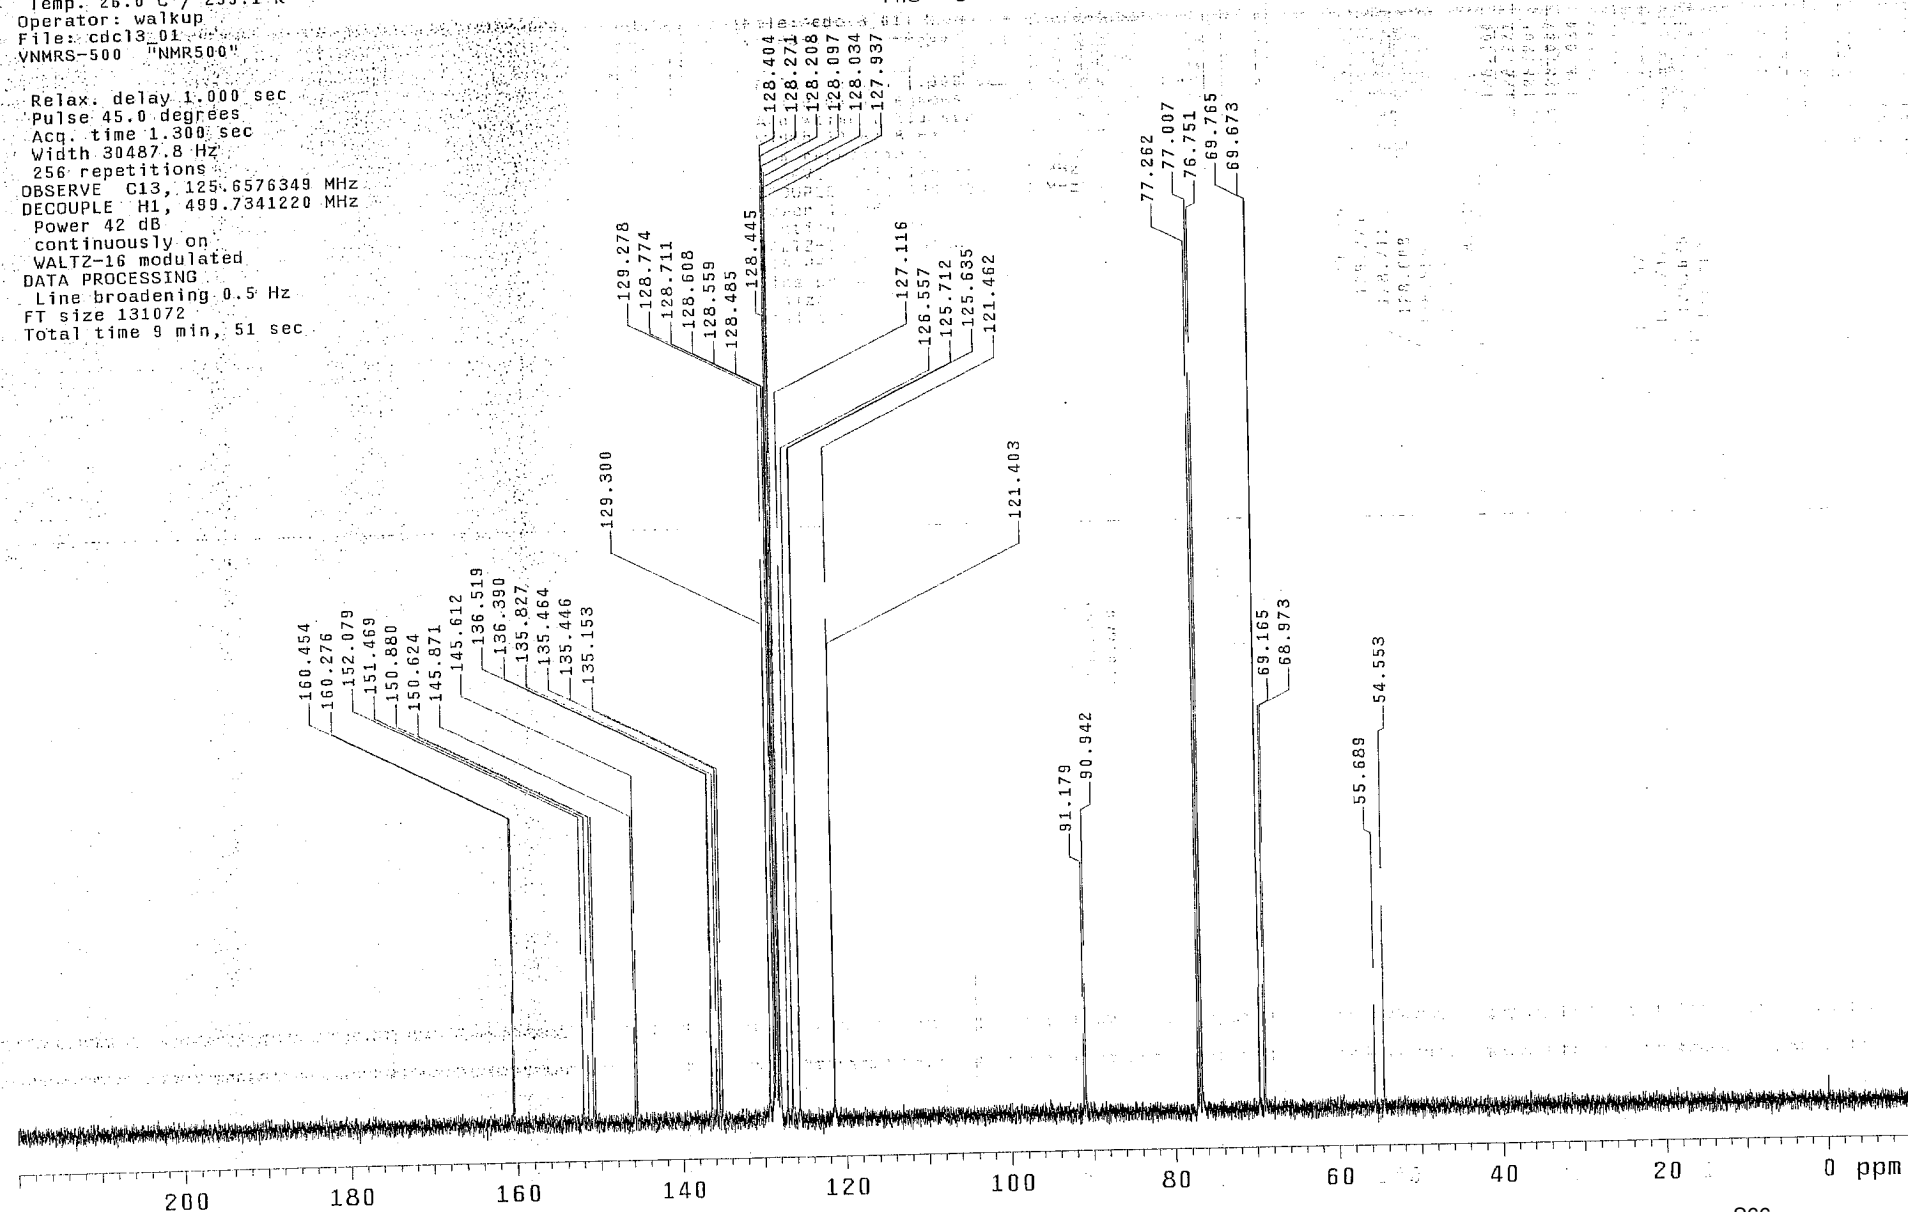

target (ISCO)

Sample: VRS-7-109A  
Sample ID: s\_20140227\_10  
File: s\_20140227\_10/data/cdc13\_0

Pulse Sequence: s2pu1

Solvent: cdc13  
Ambient temperature  
Operator: walkup  
File: cdc13\_01  
VNMRS-500 "NMR500"

Relax. delay 1.000 sec  
Pulse 45.0 degrees  
Acq. time 2.049 sec  
Width 8012.8 Hz  
8 repetitions  
OBSERVE H1, 499.7316378 MHz  
DATA PROCESSING  
Resol. enhancement -0.0 Hz  
FT size 65536  
Total time 0 min, 31 sec

# 1-Phenoxycarbonyl-2-(4-methoxyphenyl)-3,5-dibenzyloxy-1,2-dihydropyrazine (9b)

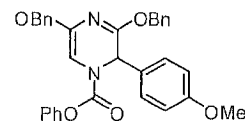

Pulse 45.0 degrees  
Acq. time 2.049 sec  
Width 8012.8 Hz  
8 repetitions  
OBSERVE H1, 499.7316378 MHz  
DATA PROCESSING  
Resol. enhancement -0.0 Hz  
FT size 65536  
Total time 0 min, 31 sec

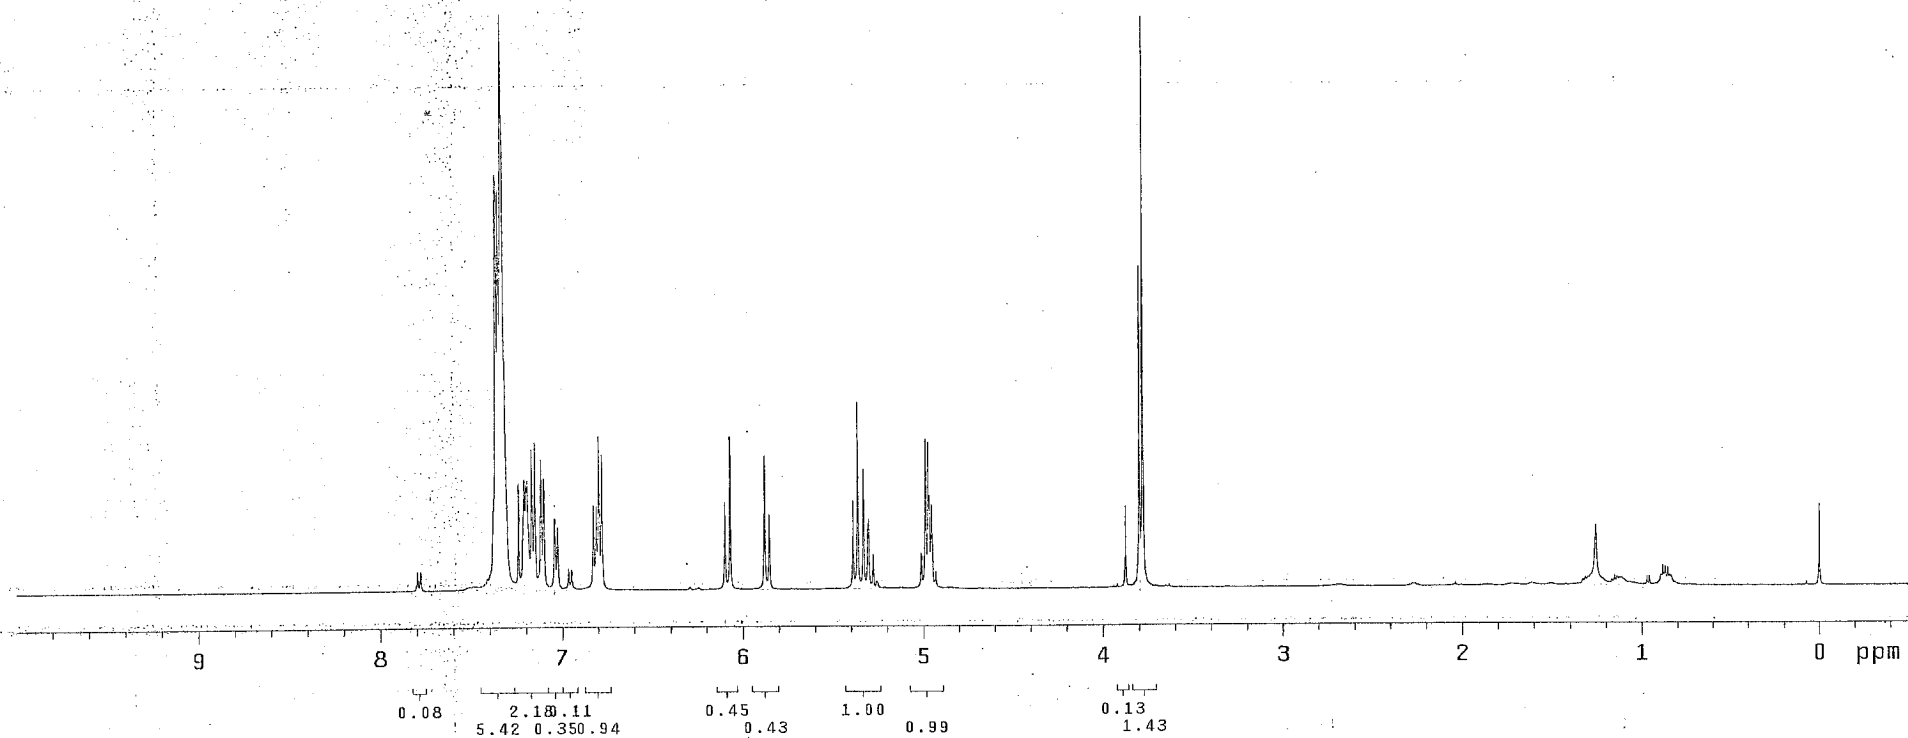

# 1-Phenoxycarbonyl-2-(4-methoxyphenyl)-3,5-dibenzoyloxy-1,2-dihydropyrazine (9b)

Target

Sample: VRS-7-109A  
Sample ID: s\_20140222\_02  
File: s\_20140222\_02/data/cd1

Pulse Sequence: s2pul

Solvent: cdcl3  
Ambient temperature  
Operator: walkup  
File: cdcl3\_01  
VNMR5-500: "NMR500"

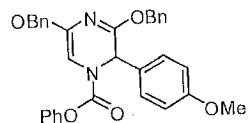

Relax. delay 1.000 sec  
Pulse 45.0 degrees  
Acq. time 1.300 sec  
Width 30487.8 Hz  
256 repetitions  
OBSERVE C13, 125.6576493 MHz  
DECOUPLE H1, 499.7341220 MHz  
Power 42 dB  
continuously on  
WALTZ-16 modulated  
DATA PROCESSING  
Line broadening 0.5 Hz  
FT size 131072  
Total time 9 min, 51 sec

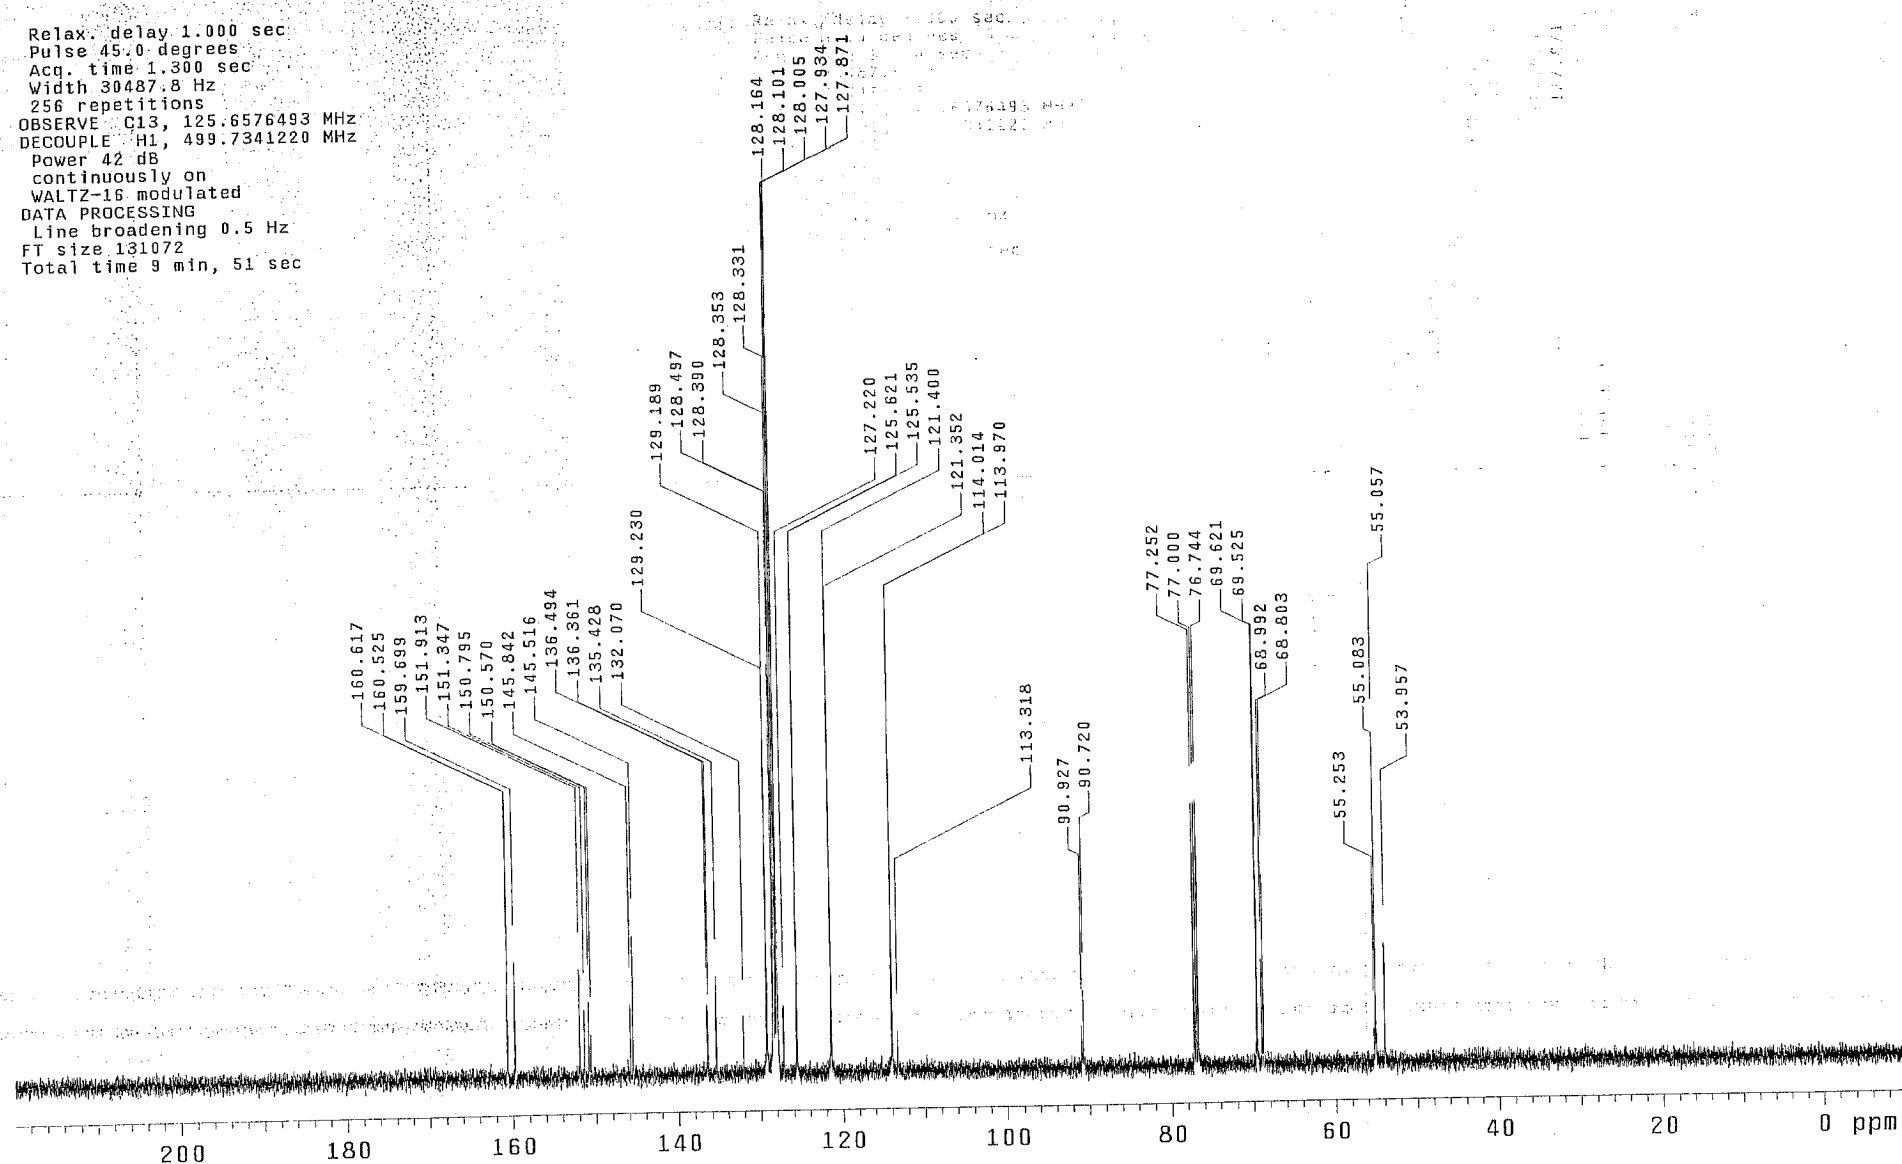

Purified Sec I

Sample: VRS-7-116  
Sample ID: s\_20131126\_03  
File: s\_20131126\_03/data/cdc13\_01.fid

Pulse Sequence: s2pul

Solvent: cdcl3  
Temp. 26.0 C / 299.1 K  
Operator: walkup  
File: cdcl3\_01  
VNMR5-500 "NMR500"

Relax. delay 1.000 sec  
Pulse 45.0 degrees  
Acq. time 2.049 sec  
Width 8012.8 Hz  
8 repetitions  
OBSERVE H1, 499.7316405 MHz  
DATA PROCESSING  
Resol. enhancement -0.0 Hz  
FT size 65536  
Total time 0 min, 31 sec

# 1-Phenoxycarbonyl-2-methyl-3-(benzyloxy)-5-ethyl-1,2-dihydropyrazine (10)

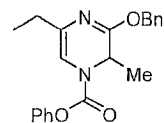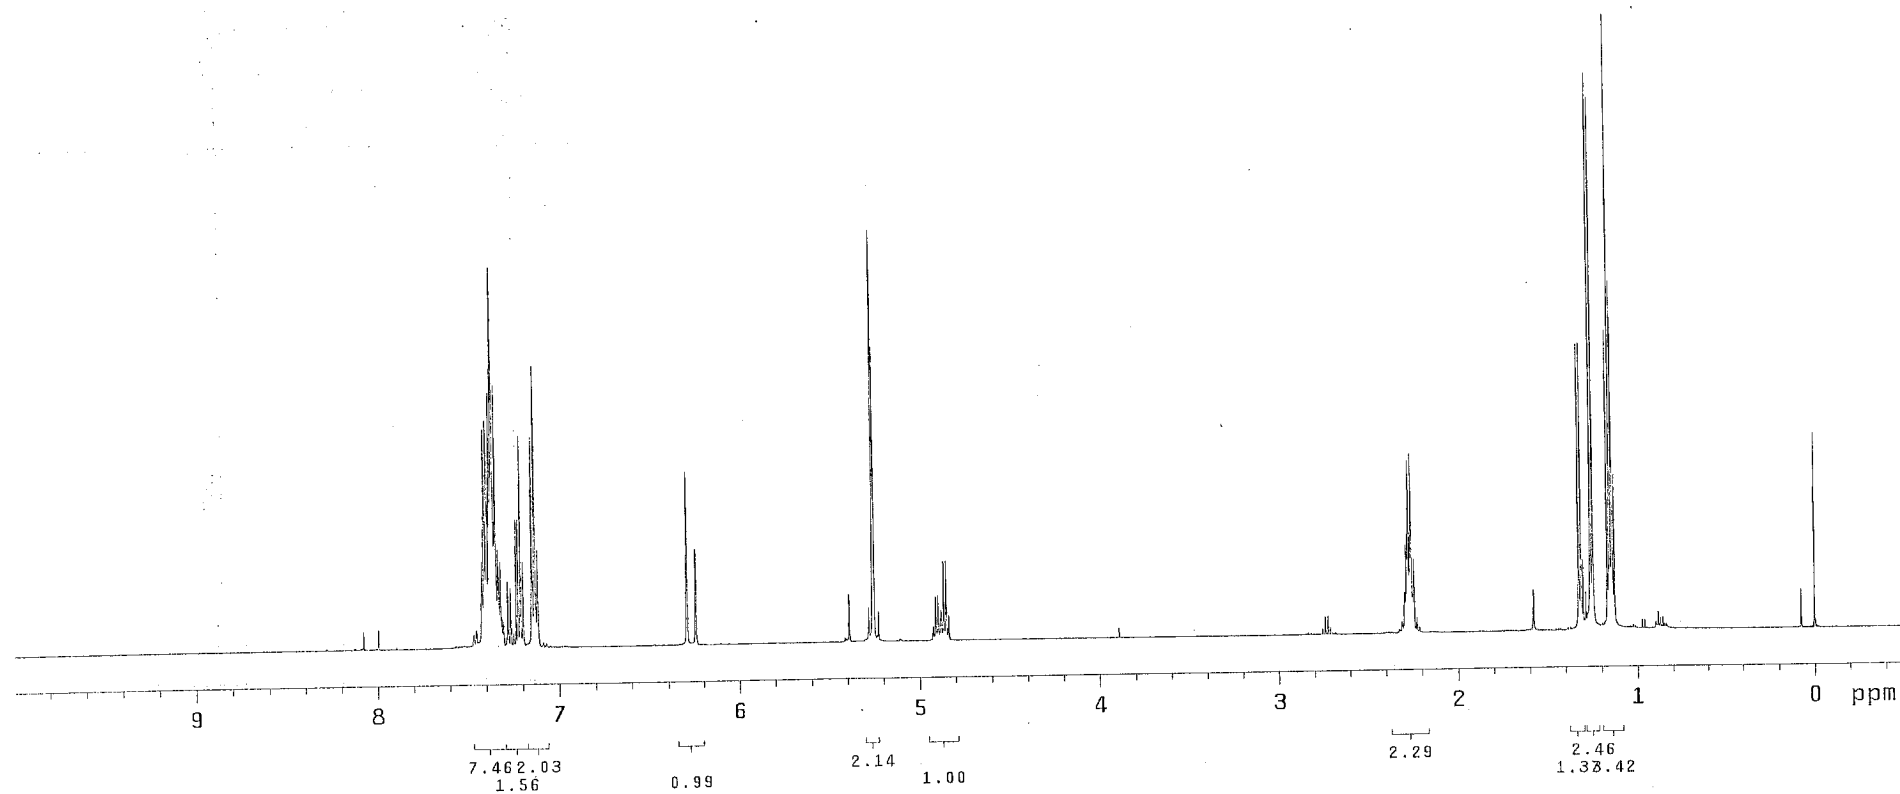

# 1-Phenoxycarbonyl-2-methyl-3-(benzyloxy)-5-ethyl-1,2-dihydropyrazine (10)

Isolated

Sample: VRS-7-116  
Sample ID: s\_20140108\_03  
File: s\_20140108\_03/data/cdc13

Pulse Sequence: s2pu1

Solvent: cdc13  
Temp. 26.0 C / 299.1 K  
Operator: walkup  
File: cdc13\_01  
VNMRS-500 "NMR500"

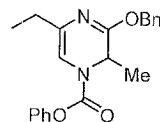

Relax. delay 1.000 sec  
Pulse 45.0 degrees  
Acq. time 1.300 sec  
Width 30487.8 Hz  
256 repetitions  
OBSERVE C13, 125.6576166 MHz  
DECOUPLE H1, 499.7341220 MHz  
Power 42 dB  
continuously on  
WALTZ-16 modulated  
DATA PROCESSING  
Line broadening 0.5 Hz  
FT size 131072  
Total time 9 min, 51 sec

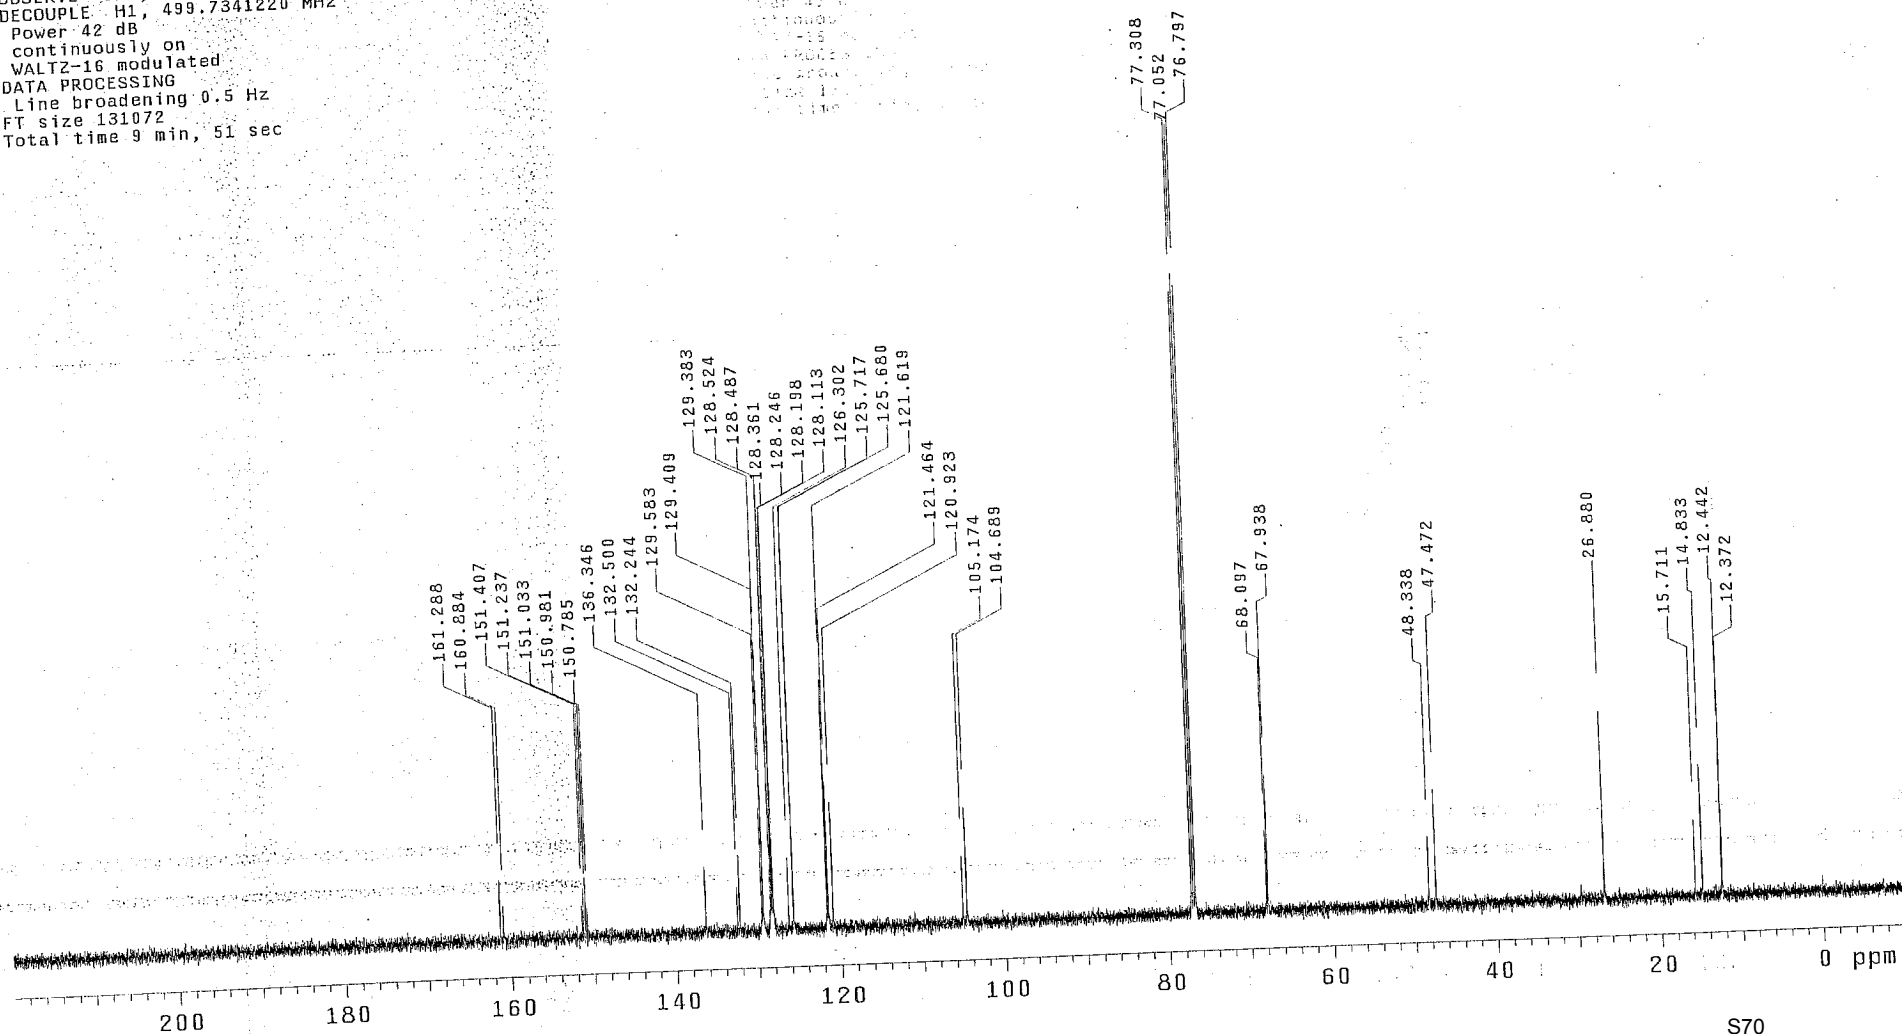

## Target (ISCO)

Sample: VRS-6-126B

Sample ID: s\_20140317\_06

File: s\_20140317\_06/data/cdc13\_01.f

Pulse Sequence: s2pul

Solvent: cdcl3

Solvent:  $\text{CHCl}_3$   
Temp. 26.0 C / 299.1 K

Operator: walkup

Operator: walk  
File: cdc13\_01

VNMRS-500 "NMR500"

Relax. delay 1.000 sec

Pulse 45.0 degrees

Pulse 43.0 degrees  
Acq. time 2.049 sec

Width 8012.8 Hz

8 repetitions

8 repetitions  
OBSERVE H1, 499.7316617 MHz

DATA PROCESSING

DATA PROCESSING  
Resol. enhancement -0.0 Hz

FT size 65536

FT size 65536  
Total time 0 min, 31 sec

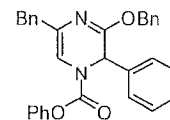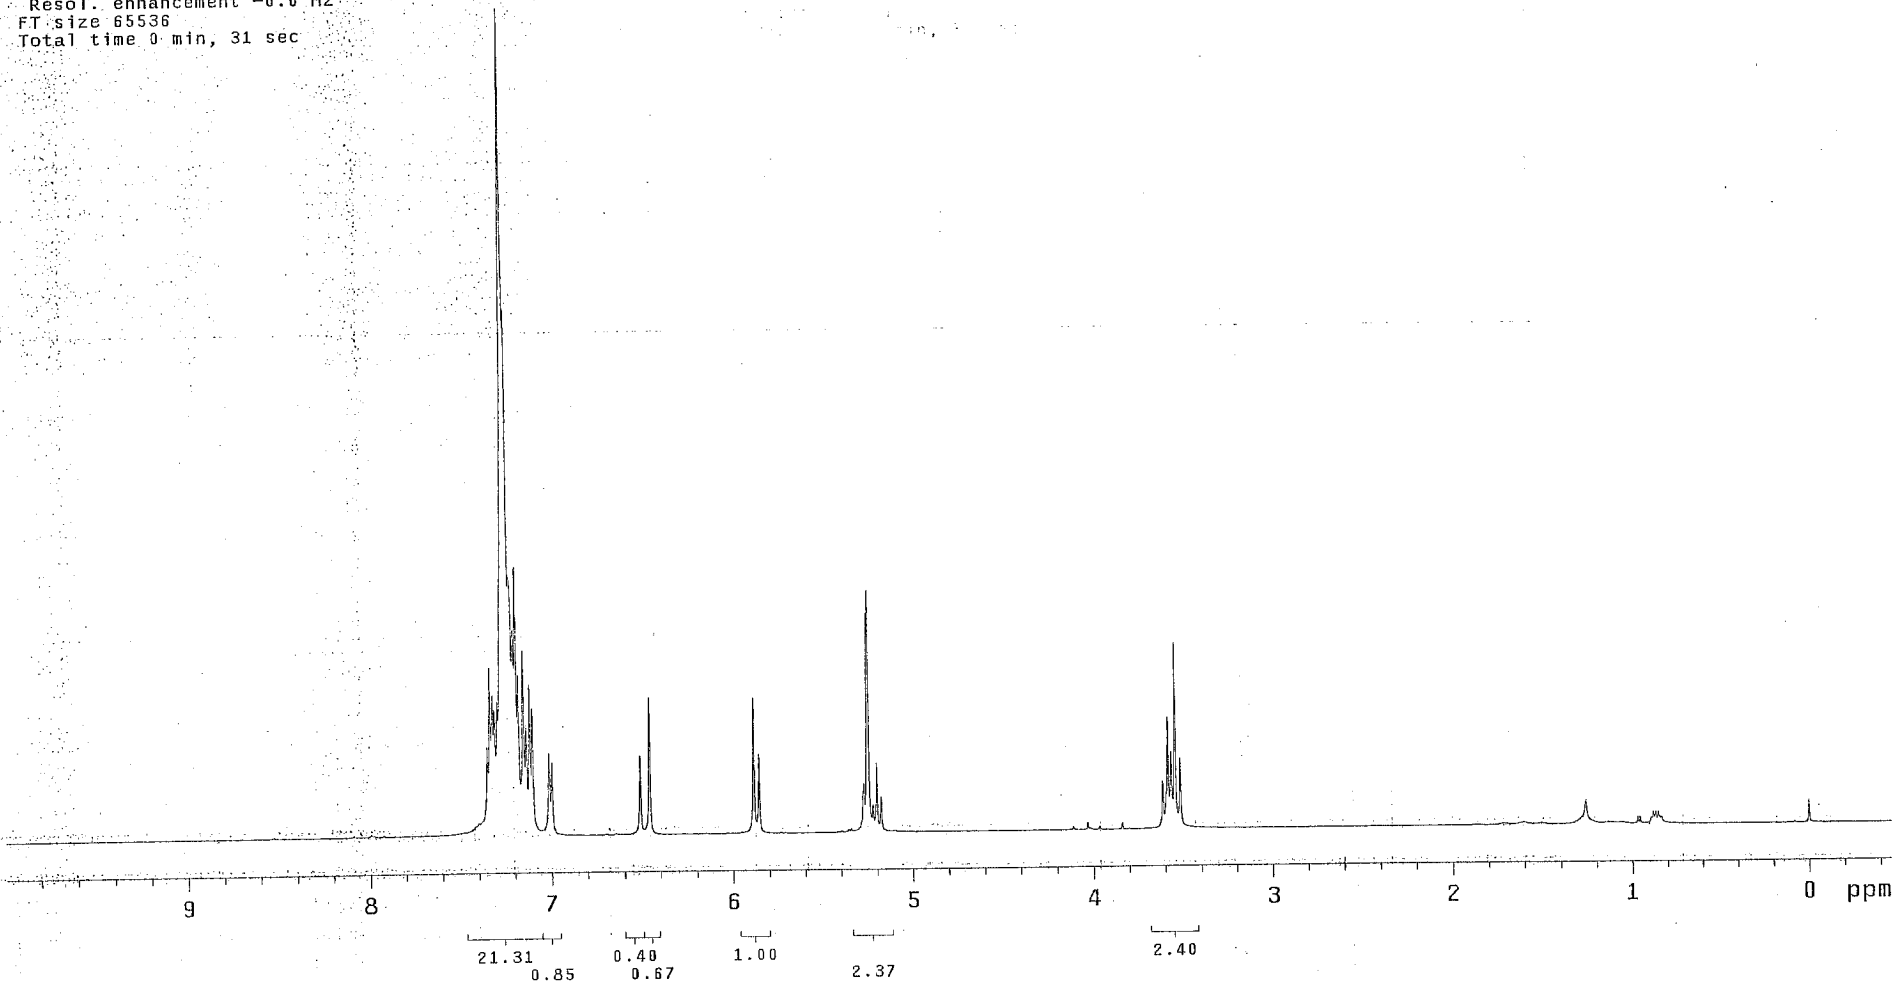



# 1-Phenoxycarbonyl-2-phenyl-3-benzyloxy-5-benzyl-1,2-dihydropyrazine (11)

Target (ISCO)

Sample: VRS-6-126B

Sample ID: s\_20140317\_07

File: s\_20140317\_07\data/cdcl3\_01.f1

Pulse Sequence: s2pul

Solvent: cdcl3

Temp. 26.0 C / 299.1 K

Operator: walkup

File: cdcl3\_01

VNMR5-500 "NMR500"

Relax. delay 1.000 sec

Pulse 45.0 degrees

Acq. time 1.300 sec

Width 30487.8 Hz

256 repetitions

OBSERVE C13, 125.6576285 MHz

DECOUPLE H1, 499.7341220 MHz

Power 42 dB

continuously on

WALTZ-16 modulated

DATA PROCESSING

Line broadening 0.5 Hz

FT size 131072

Total time 9 min, 51 sec

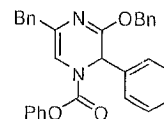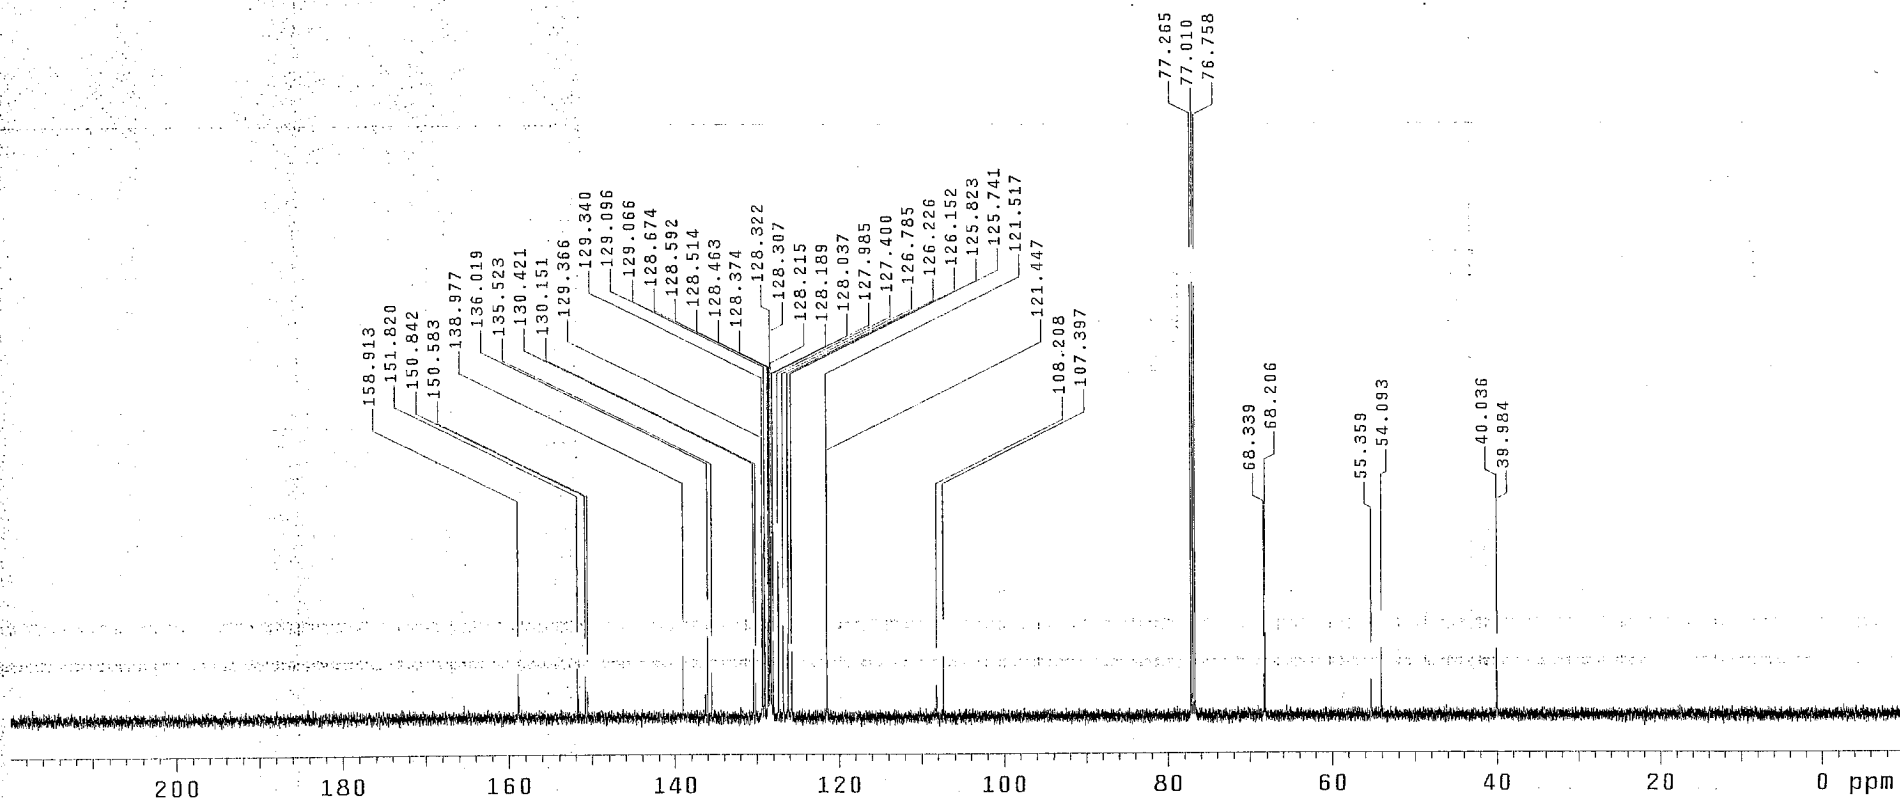

Purify

Sample: VRS-6-123b  
Sample ID: s\_20121025\_05  
File: /home/walkup/vnmrsy

Pulse Sequence: s2pu1

Solvent: cdcl3  
Temp. 26.0 C / 299.1 K  
Operator: walkup  
File: cdcl3\_01  
VNMR5-500 "NMR500"

Relax. delay 1.000 sec  
Pulse 45.0 degrees  
Acq. time 2.049 sec  
Width 8012.8 Hz  
8 repetitions  
OBSERVE H1, 499.7316366 MHz  
DATA PROCESSING  
Resol. enhancement -0.0 Hz  
FT size 65536  
Total time 0 min, 31 sec

# 1-Phenoxycarbonyl-2,5-diphenyl-3-benzyloxy-1,2-dihydropyrazine (12)

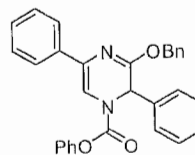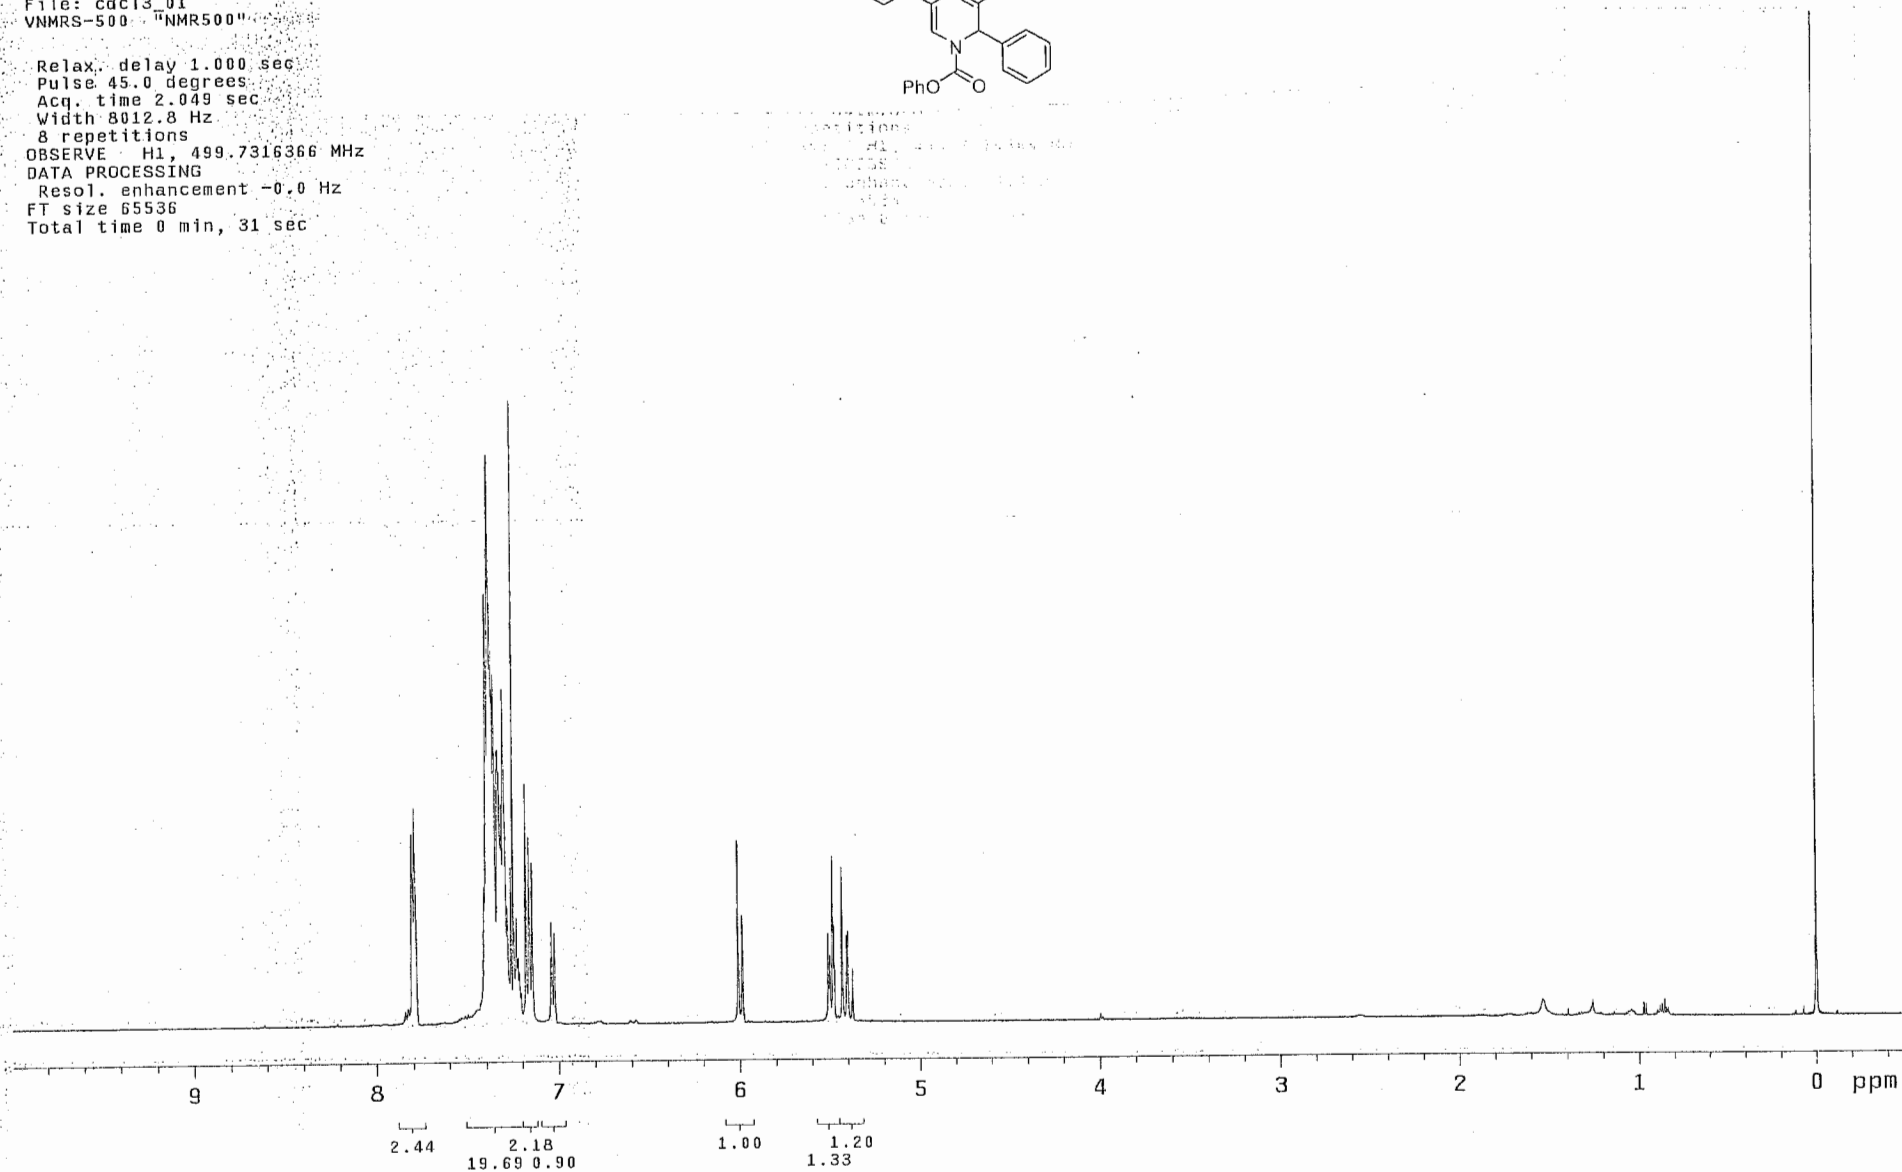

Purified (ISCO)

# 1-Phenoxycarbonyl-2,5-diphenyl-3-benzyloxy-1,2-dihydropyrazine (12)

Sample: VRS-6-123b

File: exp

Pulse Sequence: s2pu1

Solvent: cdcl3

Temp. 26.0 C / 299.1 K

Operator: walkup

VNMRS-500 "NMR500"

Relax. delay 1.000 sec

Pulse 45.0 degrees

Acq. time 1.300 sec

Width 30487.8 Hz

10048 repetitions

OBSERVE C13, 125.6576214 MHz

DECOUPLE H1, 499.7341220 MHz

Power 42 dB

continuously on

WALTZ-16 modulated

DATA PROCESSING

Line broadening 0.5 Hz

FT size 131072

Total time 16 hr, 25 min, 21 sec

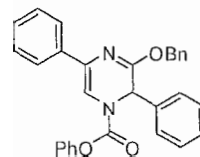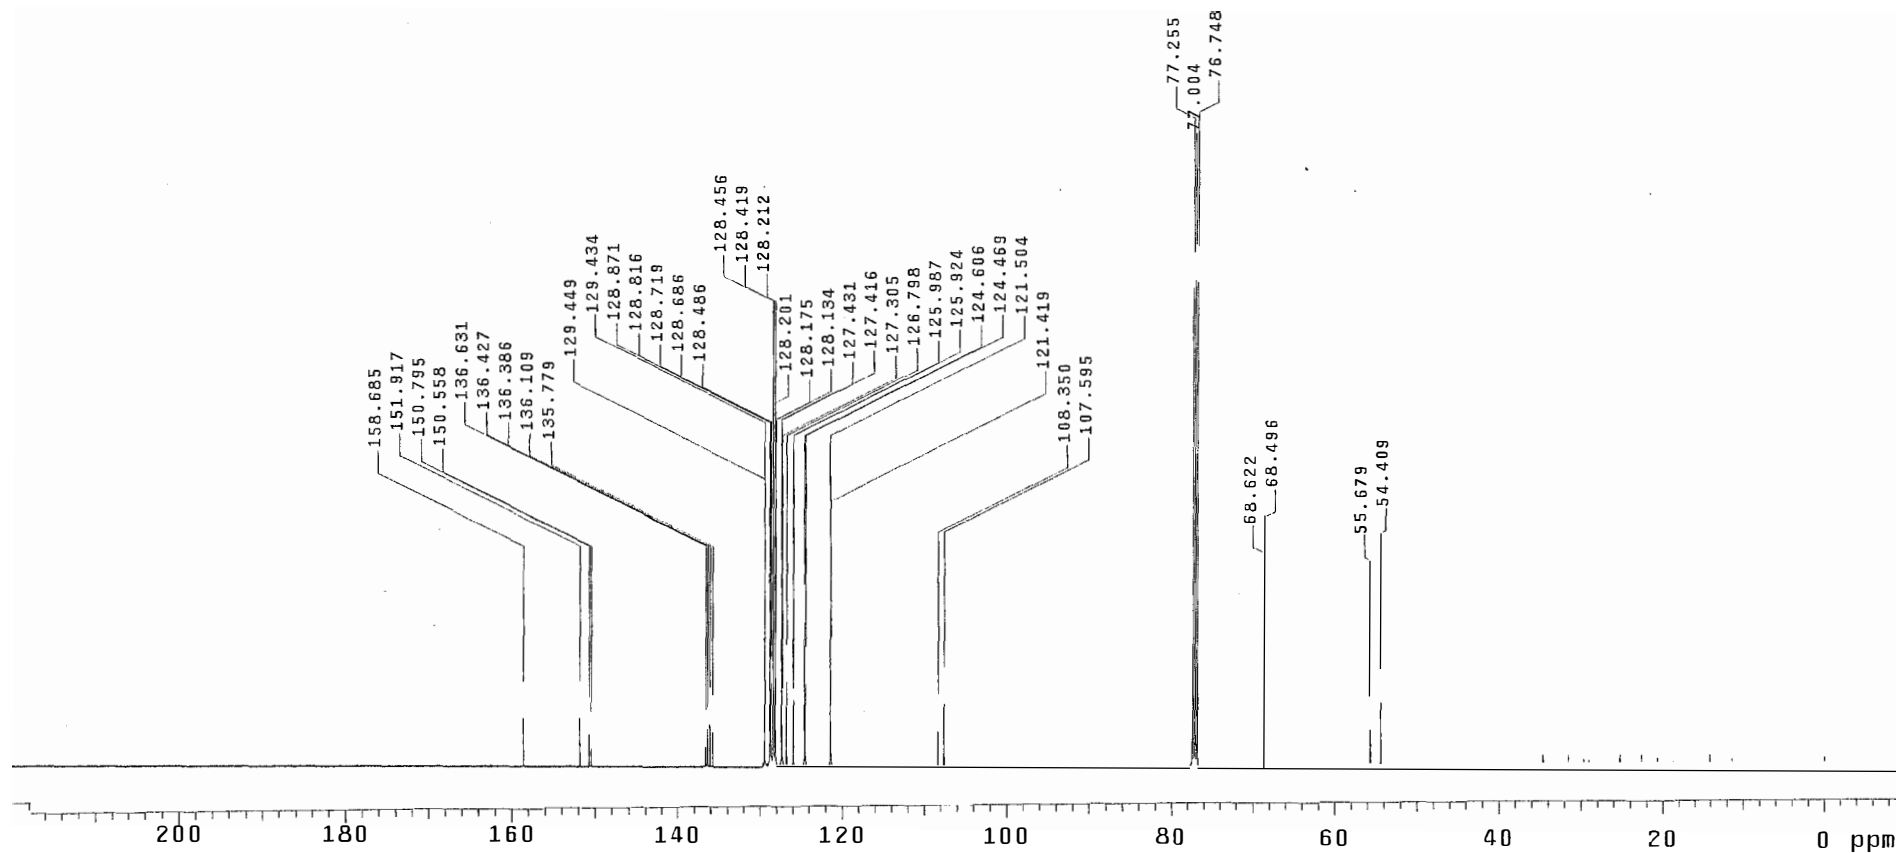

Target (ISCO)

# 1-Phenoxycarbonyl-2-phenyl-3-benzyloxy-5-(benzyloxycarbonyl)-1,2-dihydropyrazine (13)

Sample: VRS-7-60  
Sample ID: s\_20140313\_01  
File: /home/walkup/vnmrsys/stud

Pulse Sequence: s2pul

Solvent: cdcl3  
Ambient temperature  
Operator: walkup  
File: cdcl3\_01  
VNMR5-500 "NMR500"

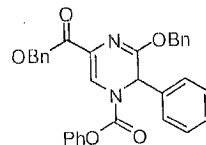

Relax. delay 1.000 sec  
Pulse 45.0 degrees  
Acq. time 2.049 sec  
Width 8012.8 Hz  
8 repetitions  
OBSERVE H1, 499.7316331 MHz  
DATA PROCESSING  
Resol. enhancement -0.0 Hz  
FT size 65536  
Total time 0 min, 30 sec

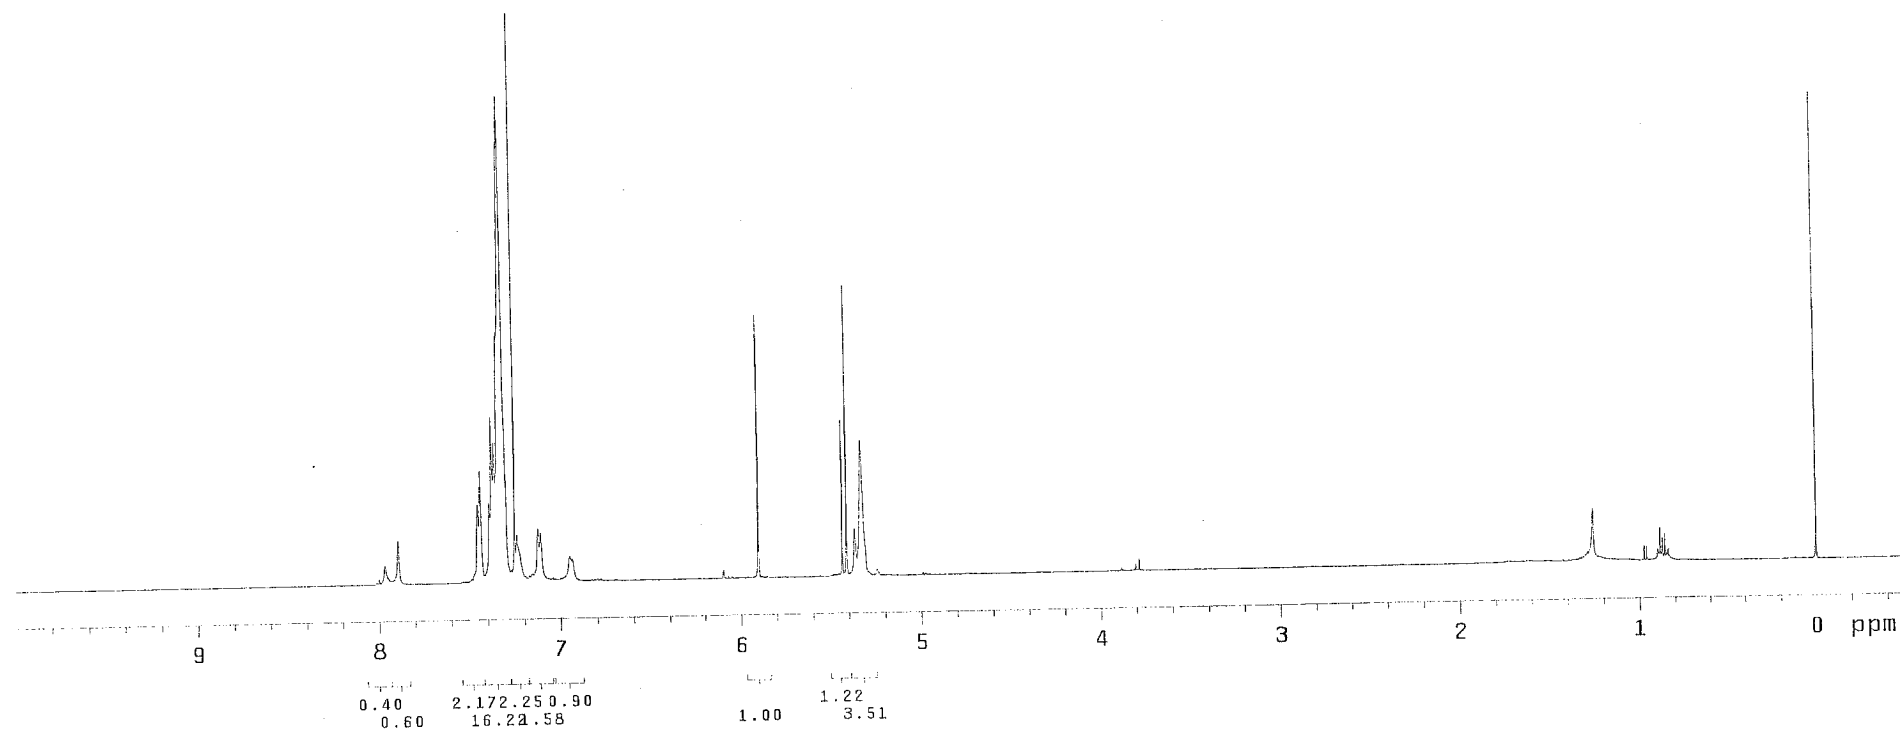

# 1-Phenoxycarbonyl-2-phenyl-3-benzyloxy-5-(benzyloxycarbonyl)-1,2-dihydropyrazine (13)

Purified

Sample: VRS-7-60(2)  
Sample ID: s\_20140122\_02  
File: /home/walkup/Va1-NMRs/VRS

Pulse Sequence: s2pul

Solvent: cdcl3  
Temp. 26.0 C / 299.1 K  
Operator: walkup  
File: VRS-7-60\_2\_CNMR  
VNMRS-500 "NMR500"

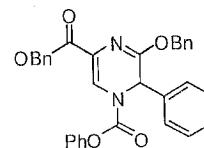

Relax. delay 1.000 sec  
Pulse 45.0 degrees  
Acq. time 1.300 sec  
Width 30487.8 Hz  
25600 repetitions  
OBSERVE C13, 125.6576184 MHz  
DECOUPLE H1, 499.7341220 MHz  
Power 42 dB  
continuously on  
WALTZ-16 modulated  
DATA PROCESSING  
Line broadening 0.5 Hz  
FT size 131072  
Total time 16 hr, 21 min, 36 sec

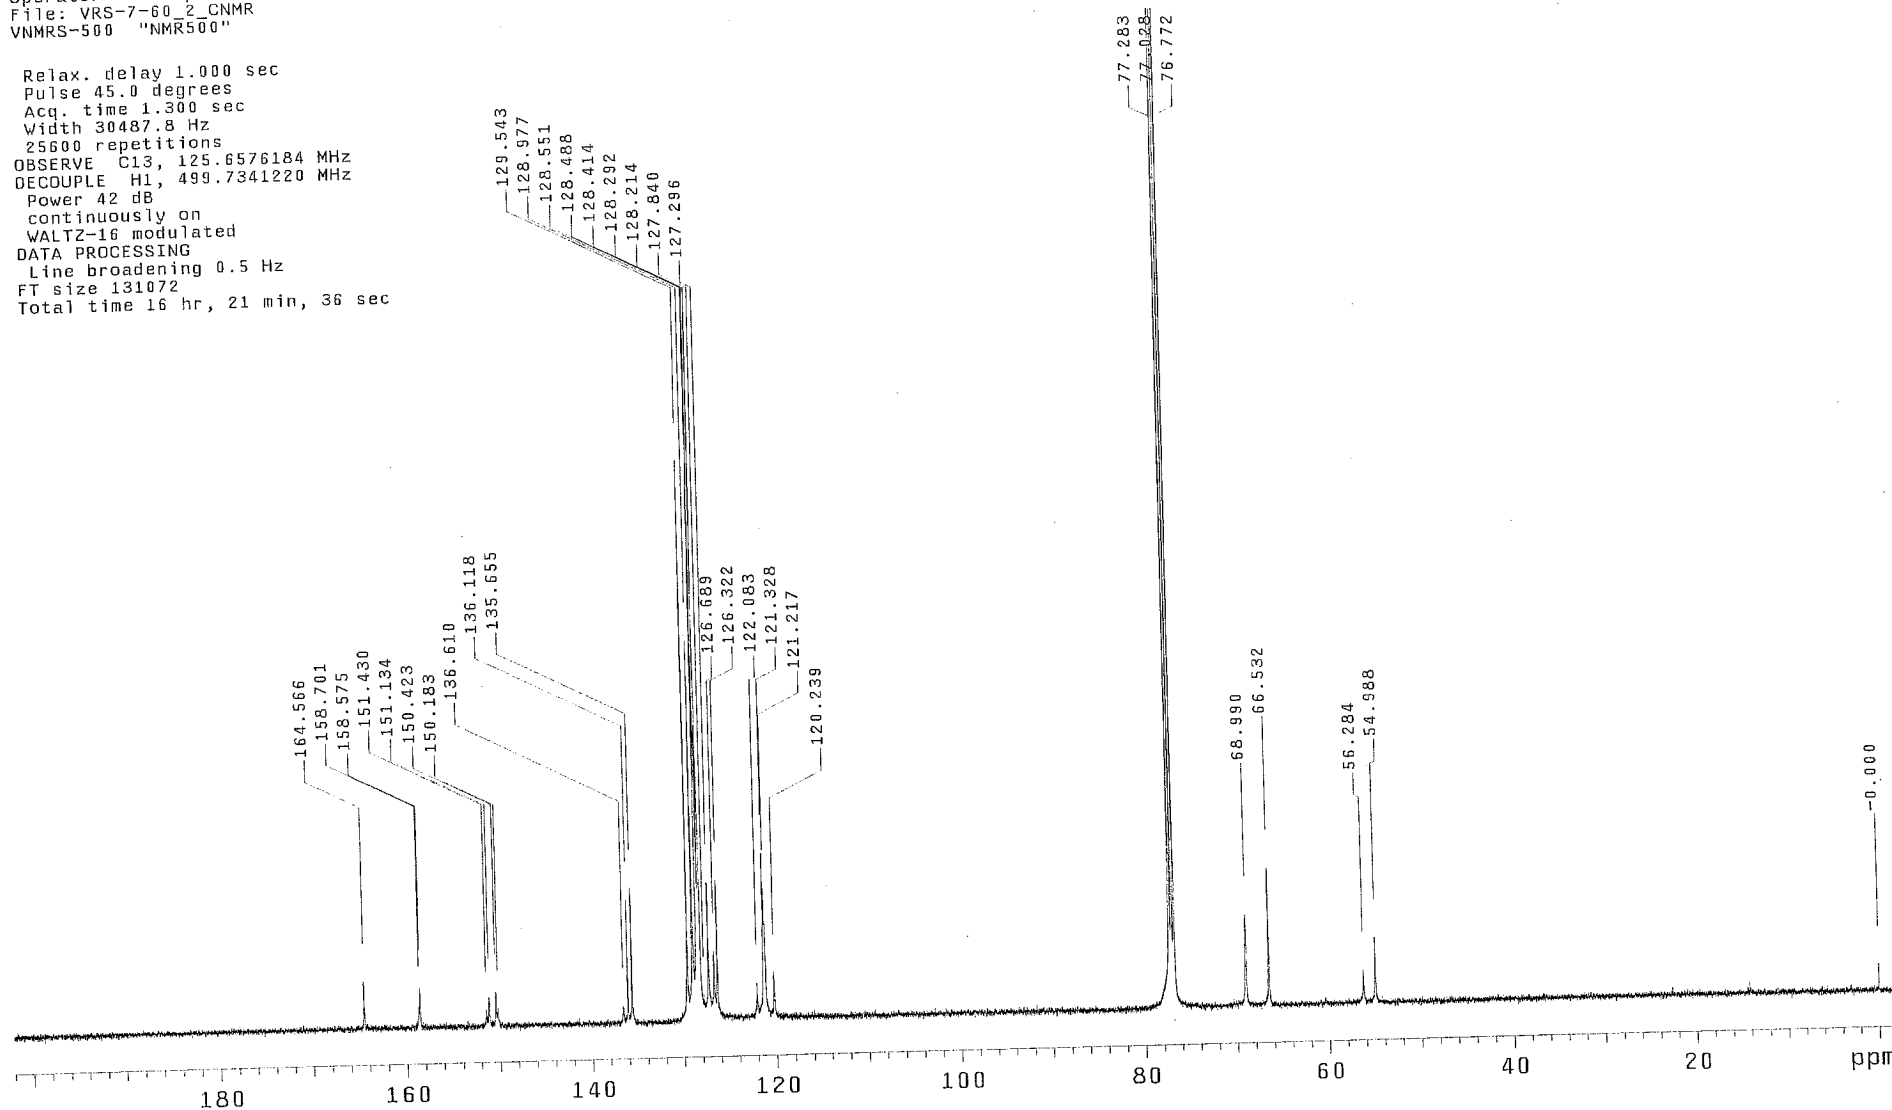

Purified VRS-6-109

Sample: VRS-6-1A  
Sample ID: s\_20120226\_03

File: /home/walkup/vnmrsys/data/auto 0000

Pulse Sequence: s2pul

Solvent: cdcl3  
Temp. 26.0 C / 299.1 K  
Operator: walkup  
File: cdcl3\_01  
VNMR5-500 "NMR500"

Relax. delay 1.000 sec  
Pulse 45.0 degrees  
Acq. time 2.049 sec  
Width 8012.8 Hz  
8 repetitions  
OBSERVE H1, 499.7316326 MHz  
DATA PROCESSING  
Resol. enhancement -0.0 Hz  
FT size 65536  
Total time 0 min, 31 sec

# Phenyl 3-oxo-2-phenyl-3,4-dihydropyrazine-1(2H)-carboxylate (14a)

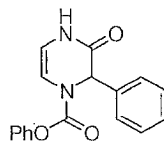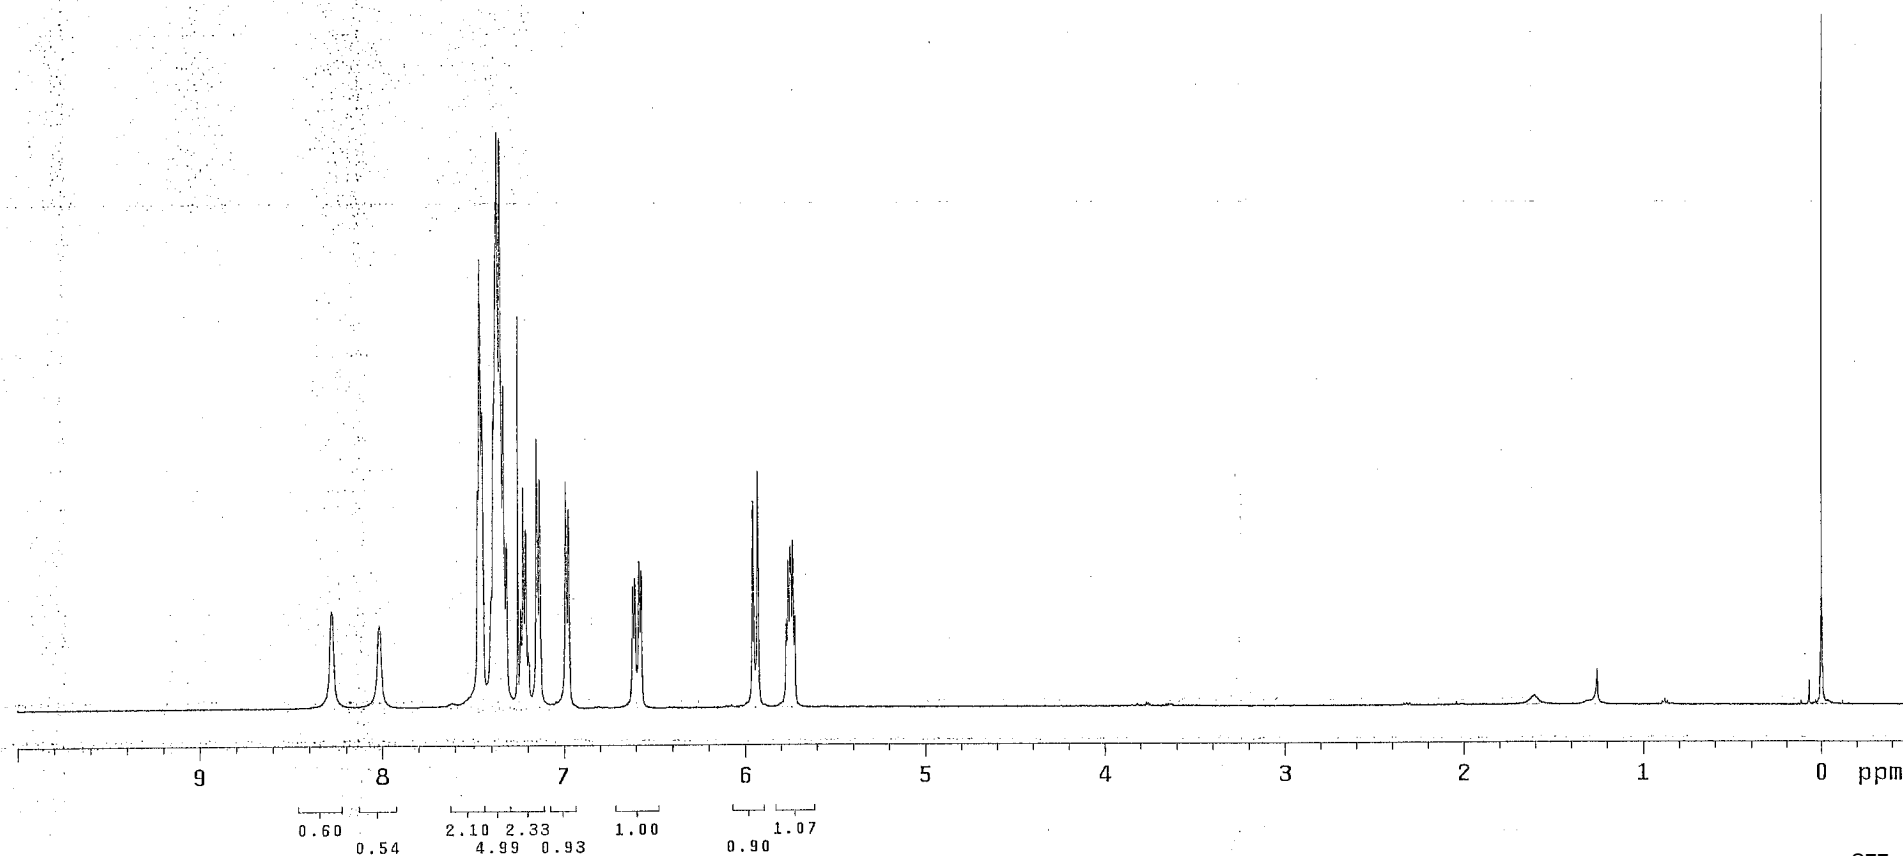

# Phenyl 3-oxo-2-phenyl-3,4-dihydropyrazine-1(2H)-carboxylate (14a)

Purified

Sample: VRS-6-109  
Sample ID: s\_20140214\_03  
File: s\_20140214\_03/data/cdc

Pulse Sequence: s2pul

Solvent: cdcl3  
Temp. 26.0 C / 299.1 K  
Operator: walkup  
File: cdcl3\_01  
VNMR5-500 "NMR500"

Relax. delay 1.000 sec  
Pulse 45.0 degrees  
Acq. time 1.300 sec  
Width 30487.8 Hz  
256 repetitions  
OBSERVE C13, 125.6576310 MHz  
DECOUPLE H1, 499.7341220 MHz  
Power 42 dB  
continuously on  
WALTZ-16 modulated  
DATA PROCESSING  
Line broadening 0.5 Hz  
FT size 131072  
Total time 9 min, 51 sec

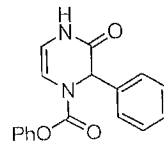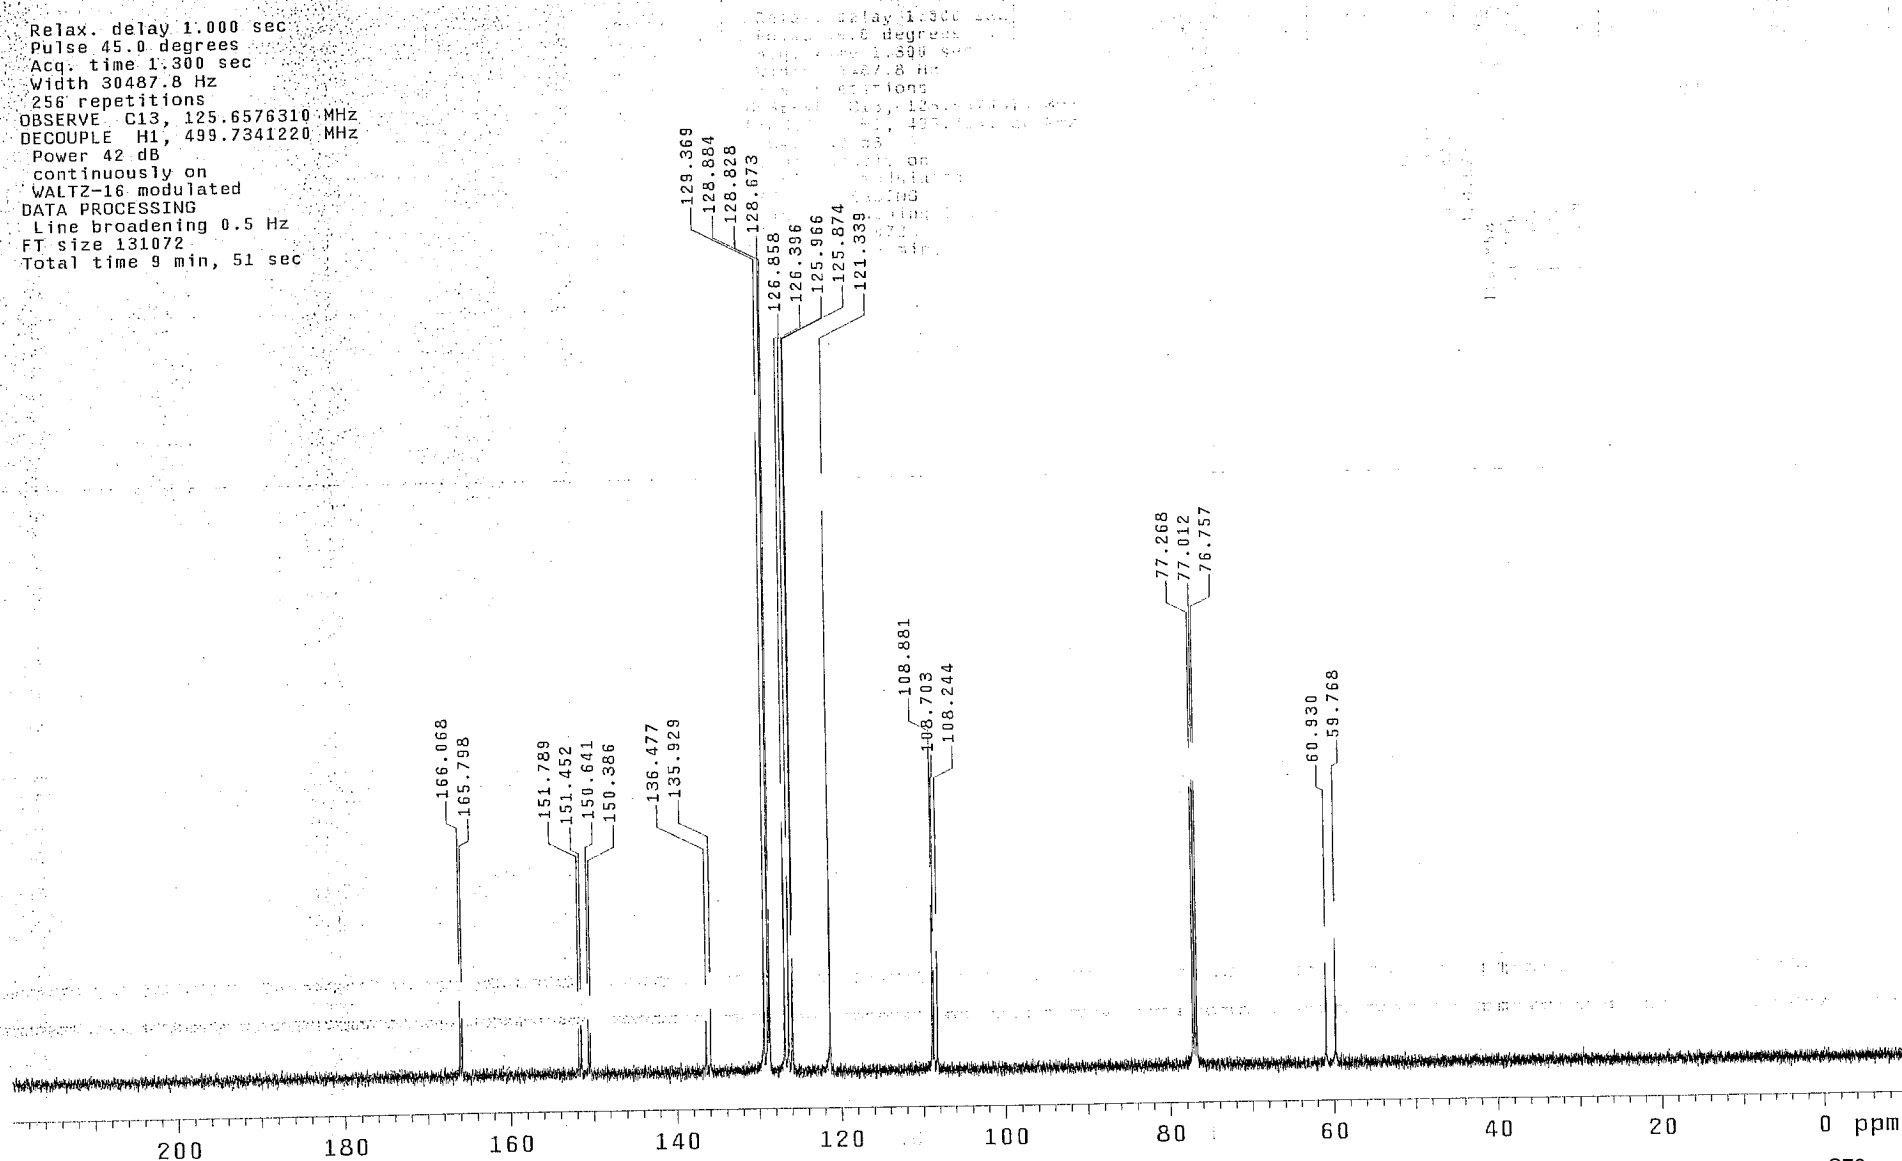

# Phenyl 2-benzyl-3-oxo-3,4-dihydropyrazine-1(2H)-carboxylate (14b)

Purified (ISCO)

Sample: VRS-6-51  
Sample ID: s\_20140421\_01  
File: s\_20140421\_01/data/cdc13\_01.fid

Pulse Sequence: s2pul

Solvent: cdc13  
Temp. 26.0 C / 299.1 K  
Operator: walkup  
File: cdc13\_01  
VNMRS-500 "NMR500"

Relax. delay 1.000 sec  
Pulse 45.0 degrees  
Acq. time 2.049 sec  
Width 8012.8 Hz  
8 repetitions  
OBSERVE H1, 499.7316300 MHz  
DATA PROCESSING  
Resol. enhancement -0.0 Hz  
FT size 65536  
Total time 0 min, 31 sec

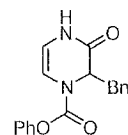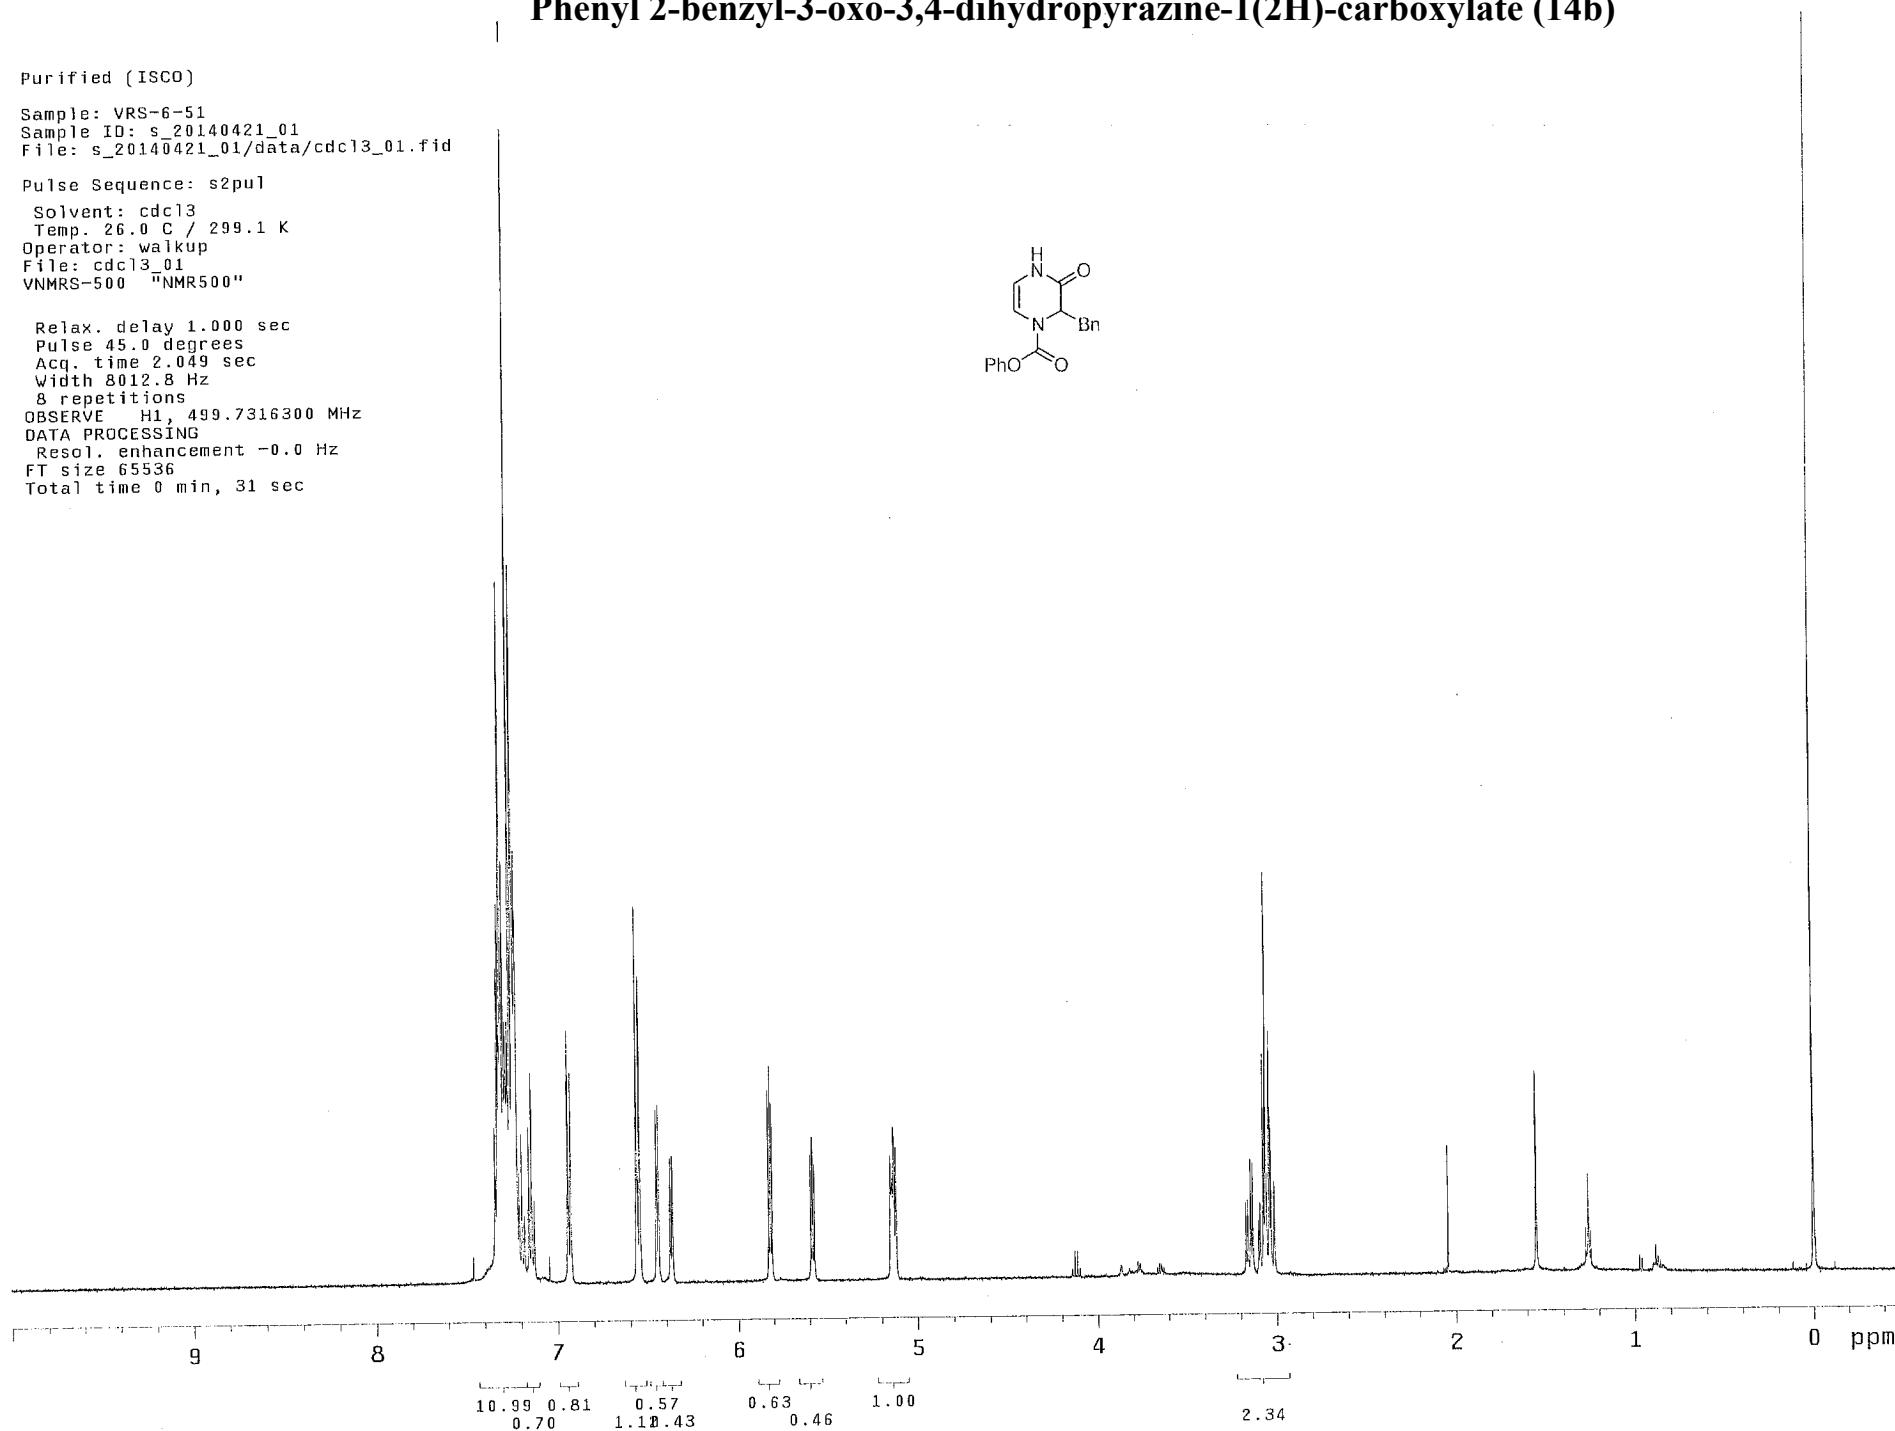



# Phenyl 2-benzyl-3-oxo-3,4-dihydropyrazine-1(2H)-carboxylate (14b)

Purified (ISCO)

Sample: VRS-6-51  
Sample ID: s\_20140422\_02  
File: s\_20140422\_02/data/cdc13\_01.fid

Pulse Sequence: s2pu1

Solvent: cdcl3  
Temp. 26.0 C / 299.1 K  
Operator: walkup  
File: cdc13\_01  
VNMR5-500 "NMR500"

Relax. delay 1.000 sec  
Pulse 45.0 degrees  
Acq. time 1.300 sec  
Width 30487.8 Hz  
256 repetitions  
OBSERVE C13, 125.6576245 MHz  
DECOUPLE H1, 499.7341220 MHz  
Power 42 dB  
continuously on  
WALTZ-16 modulated  
DATA PROCESSING  
Line broadening 0.5 Hz  
FT size 131072  
Total time 9 min, 51 sec

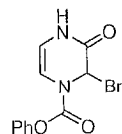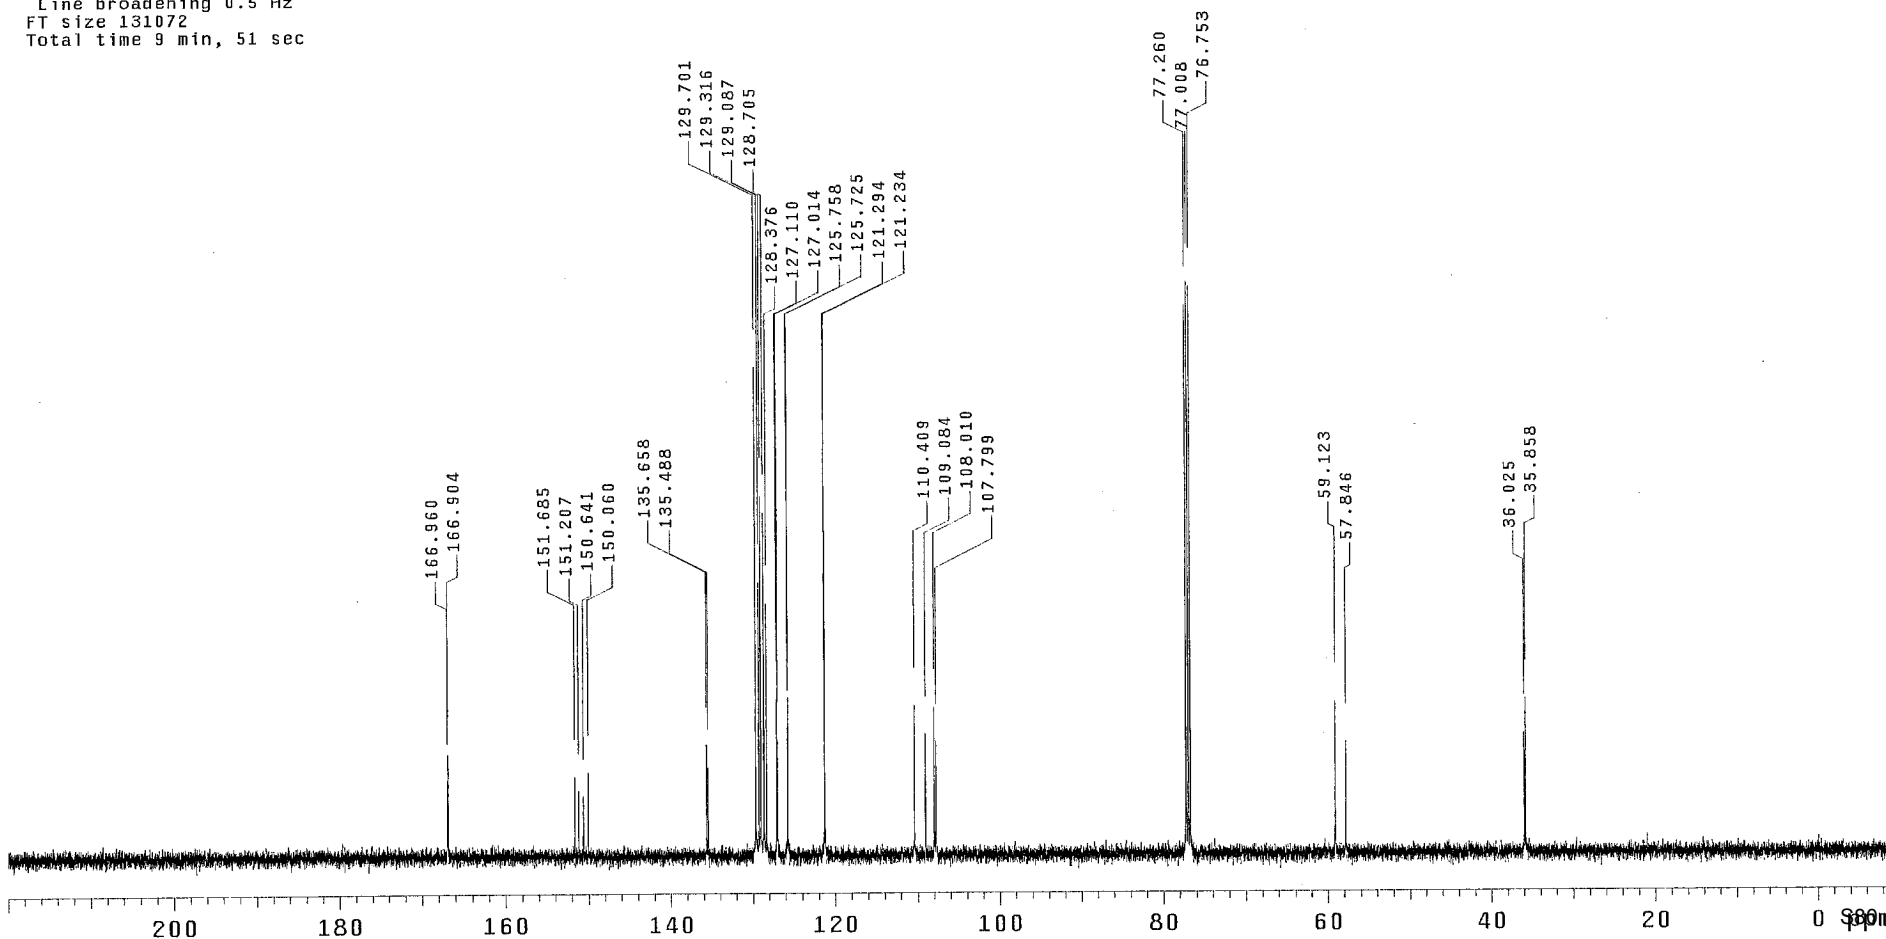

Target (ISCO)

Sample: YM-1-22

Sample ID: s\_20140312\_01

File: s\_20140312\_01/data/cdc13\_01.fid

Pulse Sequence: s2pul

Solvent: cdc13

Ambient temperature

Operator: walkup

File: cdc13\_01

VNMRS-500: "NMR500"

Relax. delay 1.000 sec

Pulse 45.0 degrees

Acq. time 2.049 sec

Width 8012.8 Hz

8 repetitions

OBSERVE: H1, 499.7316302 MHz

DATA PROCESSING

Resol. enhancement -0.0 Hz

FT size 65536

Total time 0 min, 31 sec

# Phenyl 2-(2-bromobenzyl)-3-oxo-3,4-dihydropyrazine-1(2H)-carboxylate (14c)

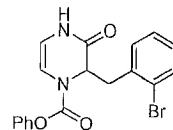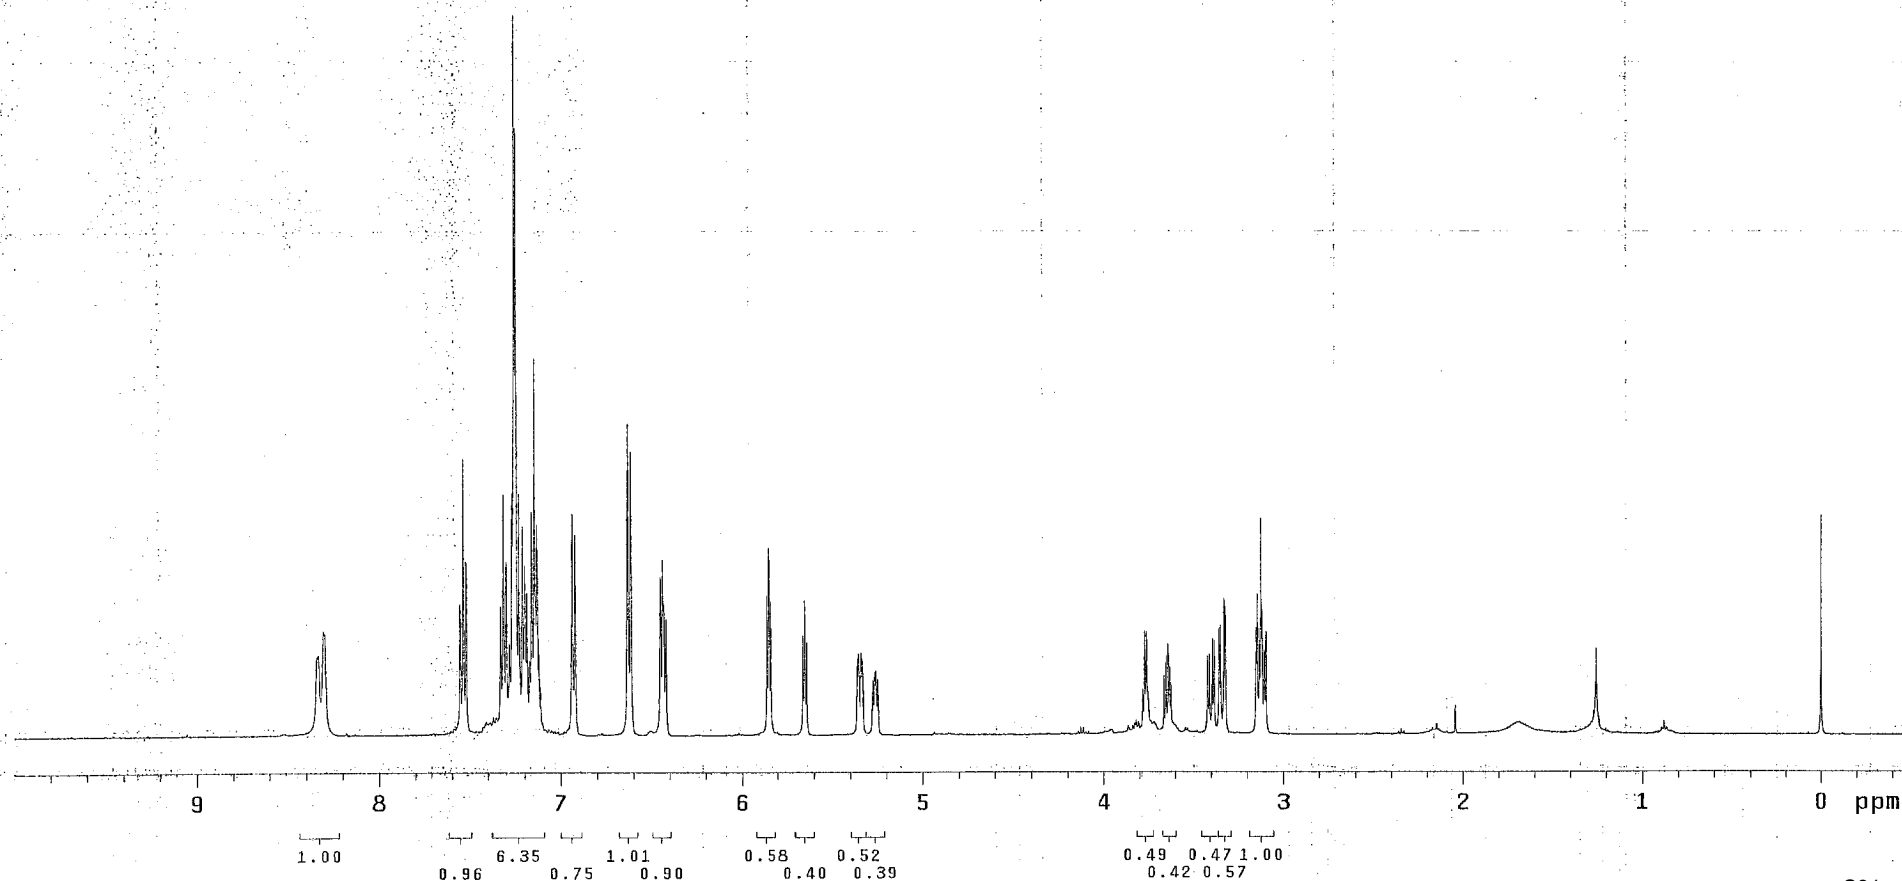

# Phenyl 2-(2-bromobenzyl)-3-oxo-3,4-dihydropyrazine-1(2H)-carboxylate (14c)

Hydrolysis (band II)

Sample: YM-1-22  
Sample ID: S\_20121205  
File: /home/walkup/Va1

Pulse Sequence: s2pu1

Solvent: cdcl3  
Temp. 26.0 C / 299.1  
Operator: walkup  
File: YM-1-22-CNMR  
VNMR5-500 "NMR500"

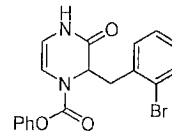

Relax. delay 1.000 sec  
Pulse 45.0 degrees  
Acq. time 1.300 sec  
Width 30487.8 Hz  
25280 repetitions  
OBSERVE C13, 125.6576264 MHz  
DECOUPLE H1, 499.7341220 MHz  
Power 42 dB  
continuously on  
WALTZ-16 modulated  
DATA PROCESSING  
Line broadening 0.5 Hz  
FT size 131072  
Total time 16 hr, 25 min, 21 sec

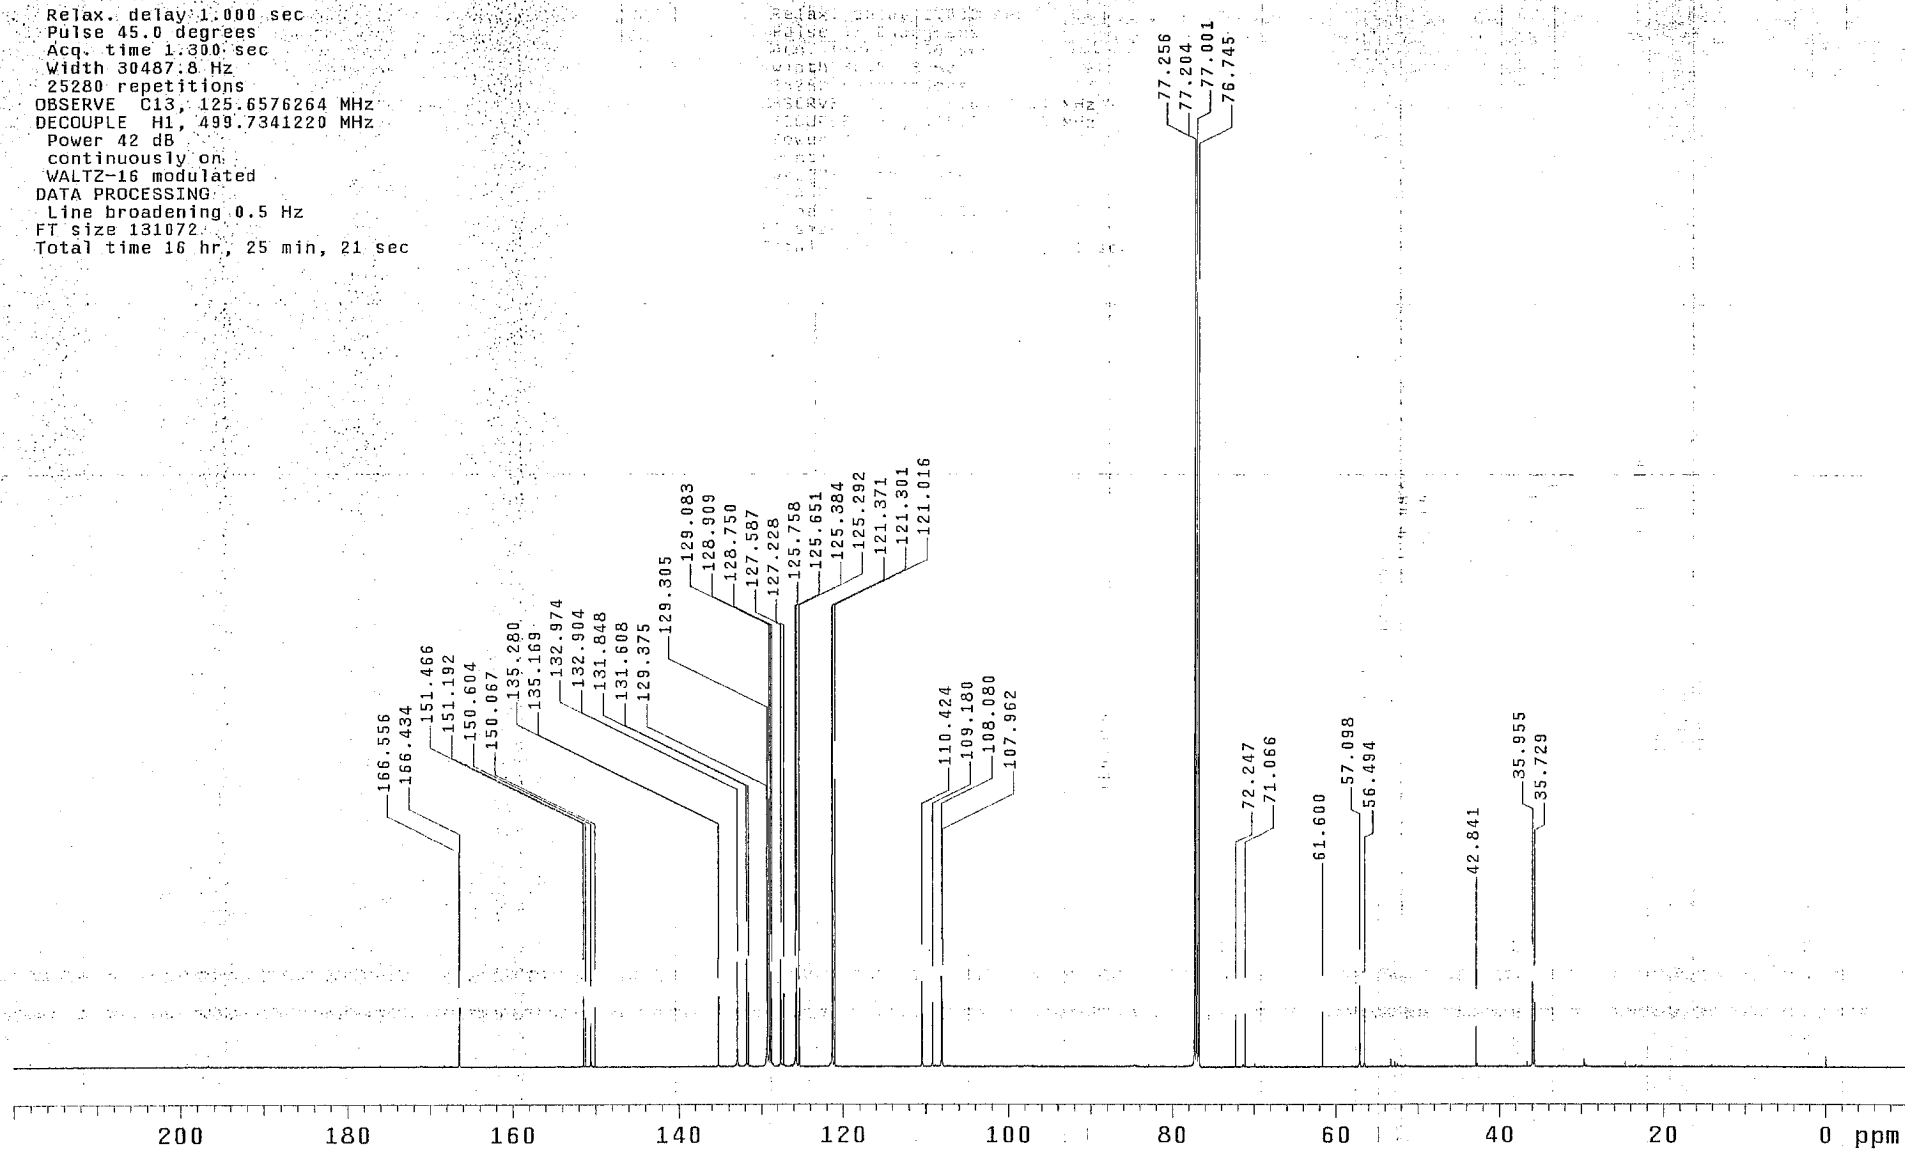

# Phenyl 5-(4-methoxyphenyl)-3-oxo-2-phenyl-3,4-dihydropyrazine-1(2H)-carboxylate (15a)

Purified

Sample: VRS-7-108  
Sample ID: s\_20131112\_01  
File: /home/walkup/vnmrsys/

Pulse Sequence: s2pul  
Solvent: cdcl3  
Temp. 26.0 C / 299.1 K  
Operator: walkup  
File: cdcl3\_01  
VNMRS-500 "NMR500"

Relax. delay 1.000 sec  
Pulse 45.0 degrees  
Acq. time 2.049 sec  
Width 8012.8 Hz  
8 repetitions  
OBSERVE H1, 499.7316339 MHz  
DATA PROCESSING  
Resol. enhancement -0.0 Hz  
FT size 65536  
Total time 0 min, 31 sec

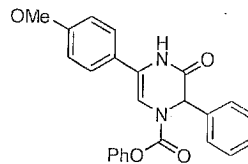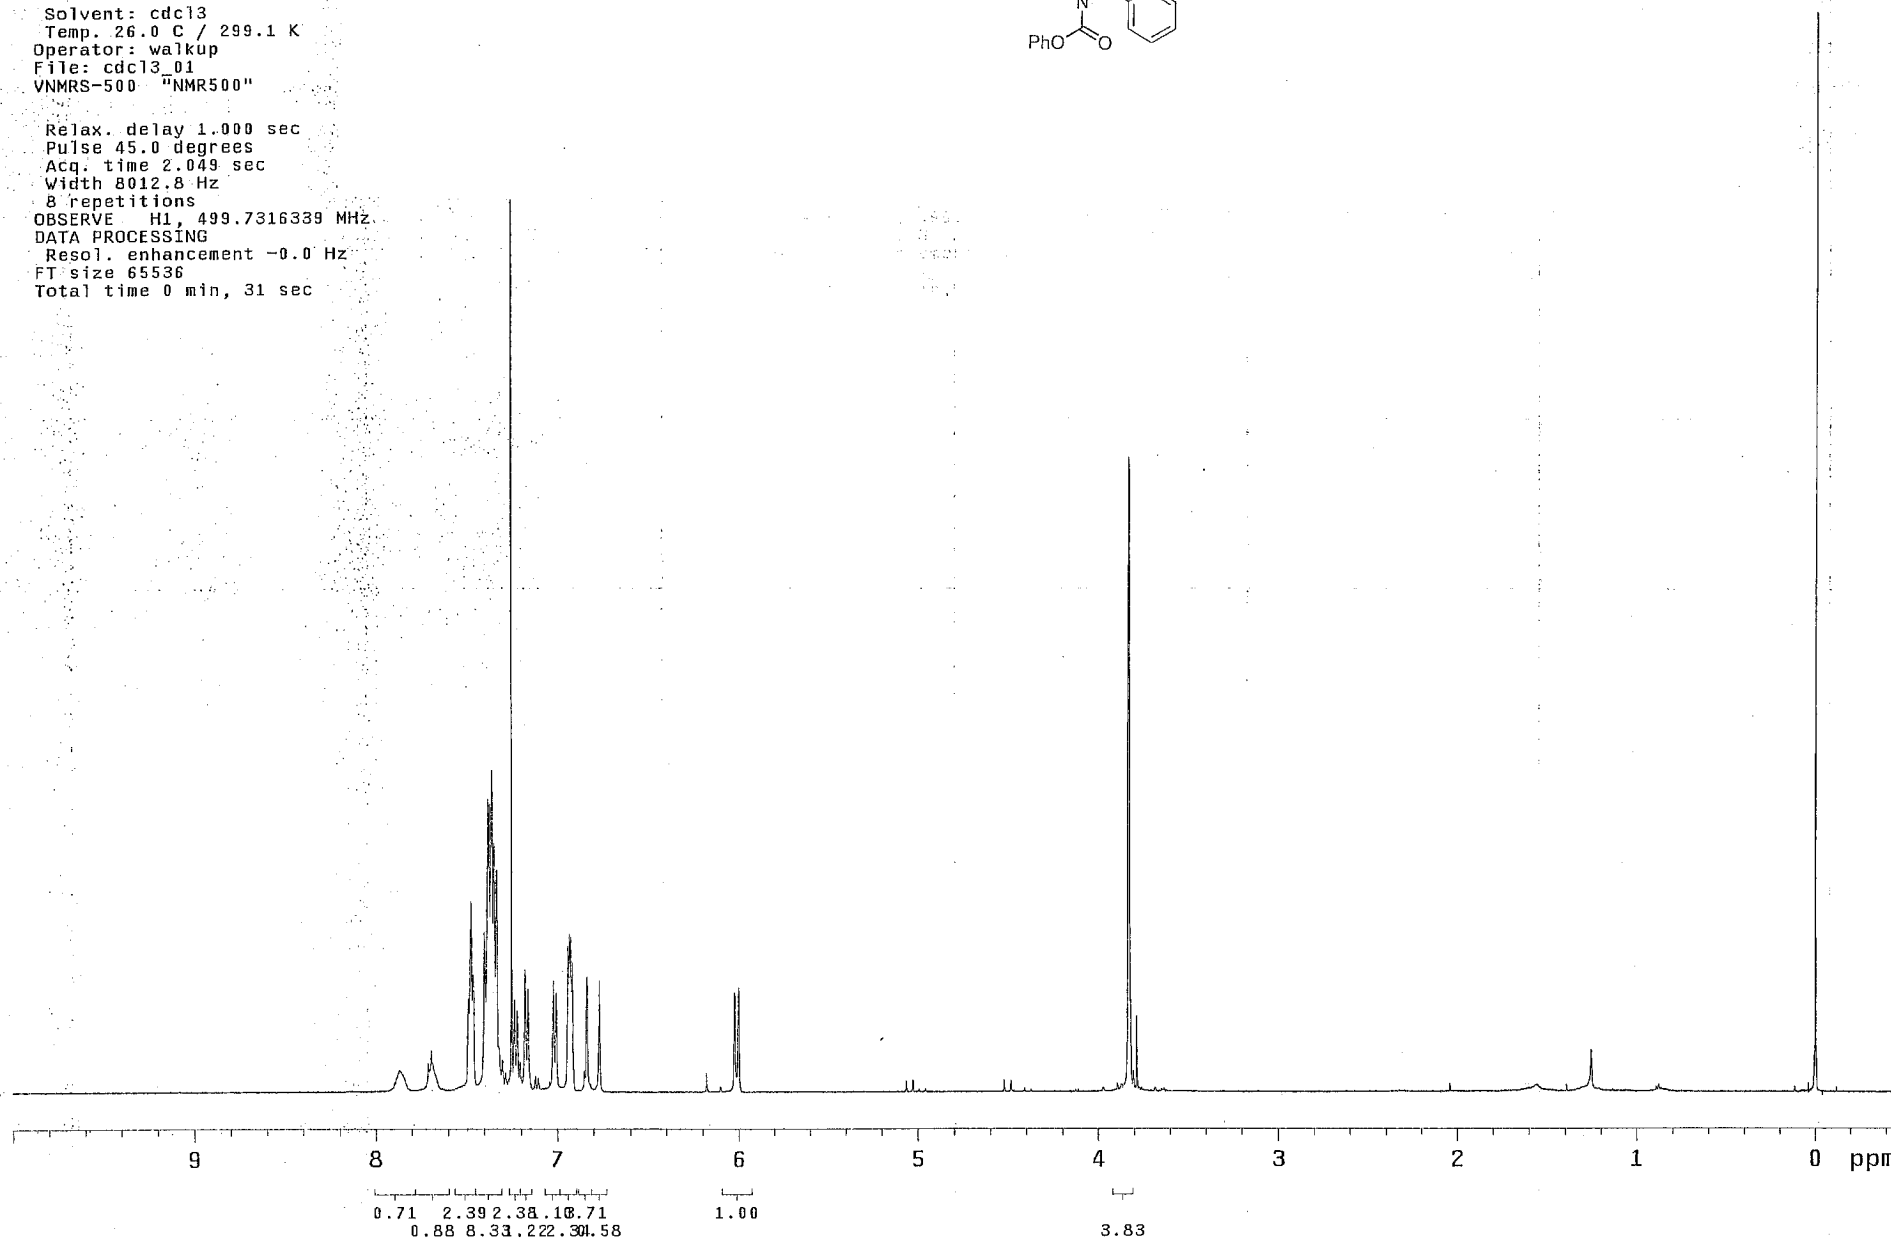

# Phenyl 5-(4-methoxyphenyl)-3-oxo-2-phenyl-3,4-dihydropyrazine-1(2H)-carboxylate (15a)

Target

Sample: VRS-7-108

File: exp

Pulse Sequence: s2pu

Solvent: cdcl3

Ambient temperature

Operator: walkup

VNMRS-500 "NMR500"

Relax. delay 1.000 sec

Pulse 45.0 degrees

Acq. time 1.300 sec

Width 30487.8 Hz

25024 repetitions

OBSERVE C13, 125.6576166 MHz

DECOUPLE H1, 499.7341220 MHz

Power 42 dB

continuously on

WALTZ-16 modulated

DATA PROCESSING

Line broadening 0.5 Hz

FT size 131072

Total time 16 hr, 25 min, 21 sec

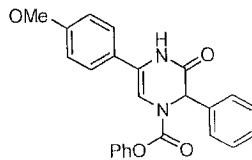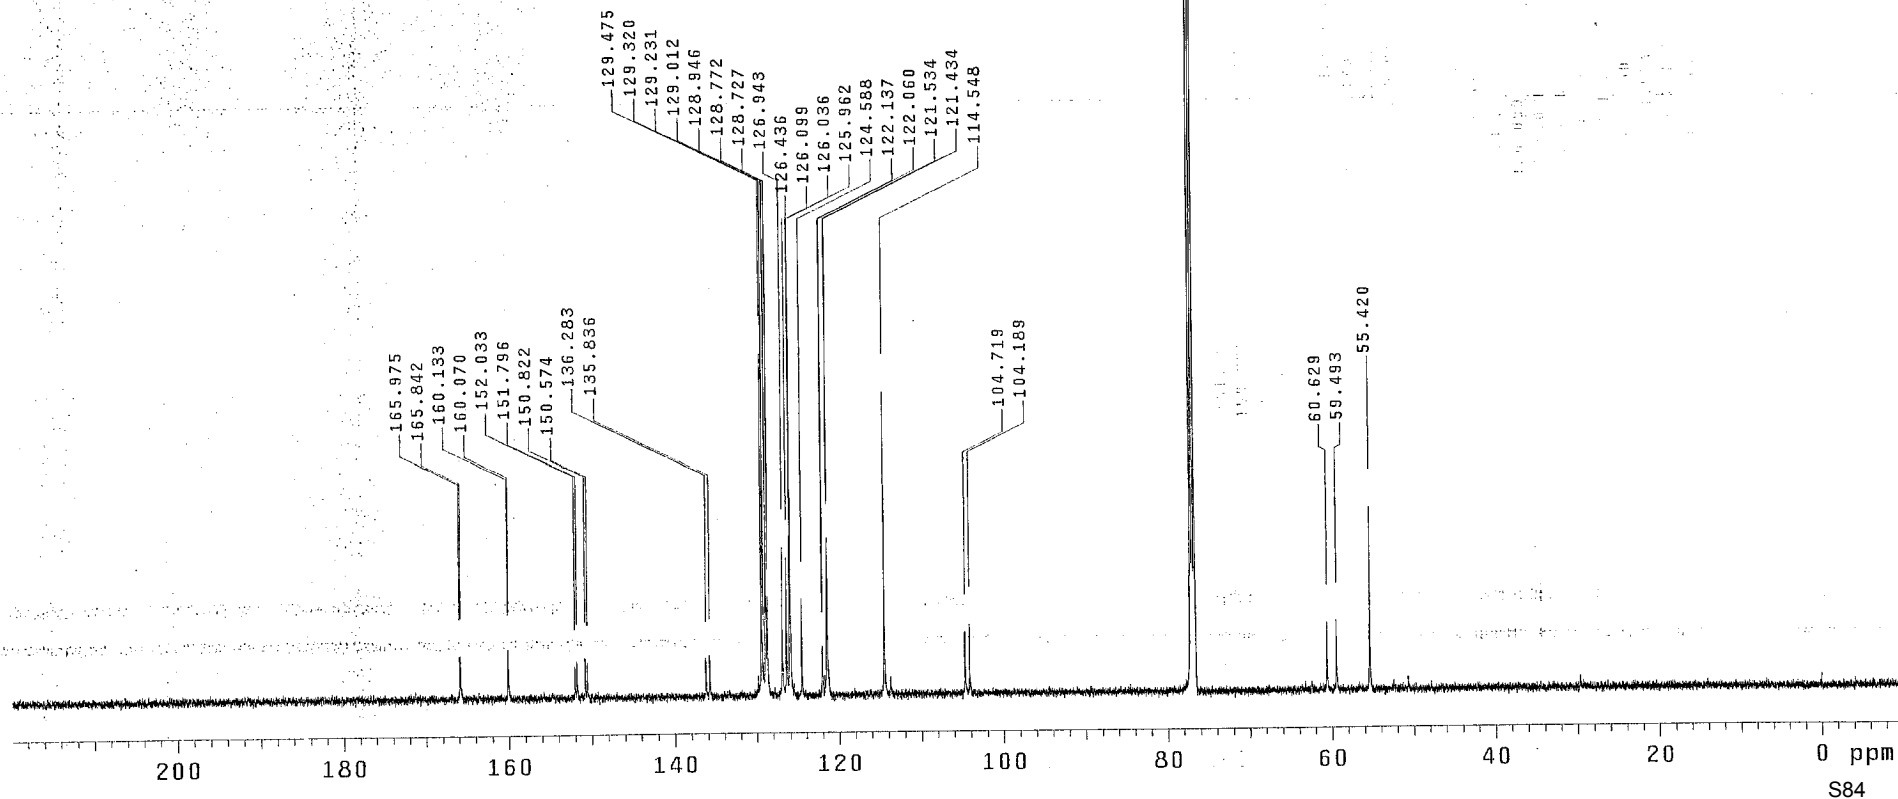

# Phenyl 5-ethyl-3-oxo-2-phenyl-3,4-dihydropyrazine-1(2H)-carboxylate (15b)

Sample: DBR-4-615  
Sample ID: s\_20120725\_02  
File: s\_20120725\_02/data

Pulse Sequence: s2pul  
Solvent: cdcl3  
Temp. 26.0 C / 299.1 K  
Operator: walkup  
File: cdcl3\_01  
VNMR5-500 "NMR500"

Relax. delay 1.000 sec  
Pulse 45.0 degrees  
Acq. time 2.049 sec  
Width 8012.8 Hz  
8 repetitions  
OBSERVE H1, 499.7316285 MHz  
DATA PROCESSING  
Resol. enhancement -0.0 Hz  
FT size 65536  
Total time 0 min, 31 sec

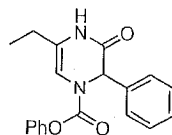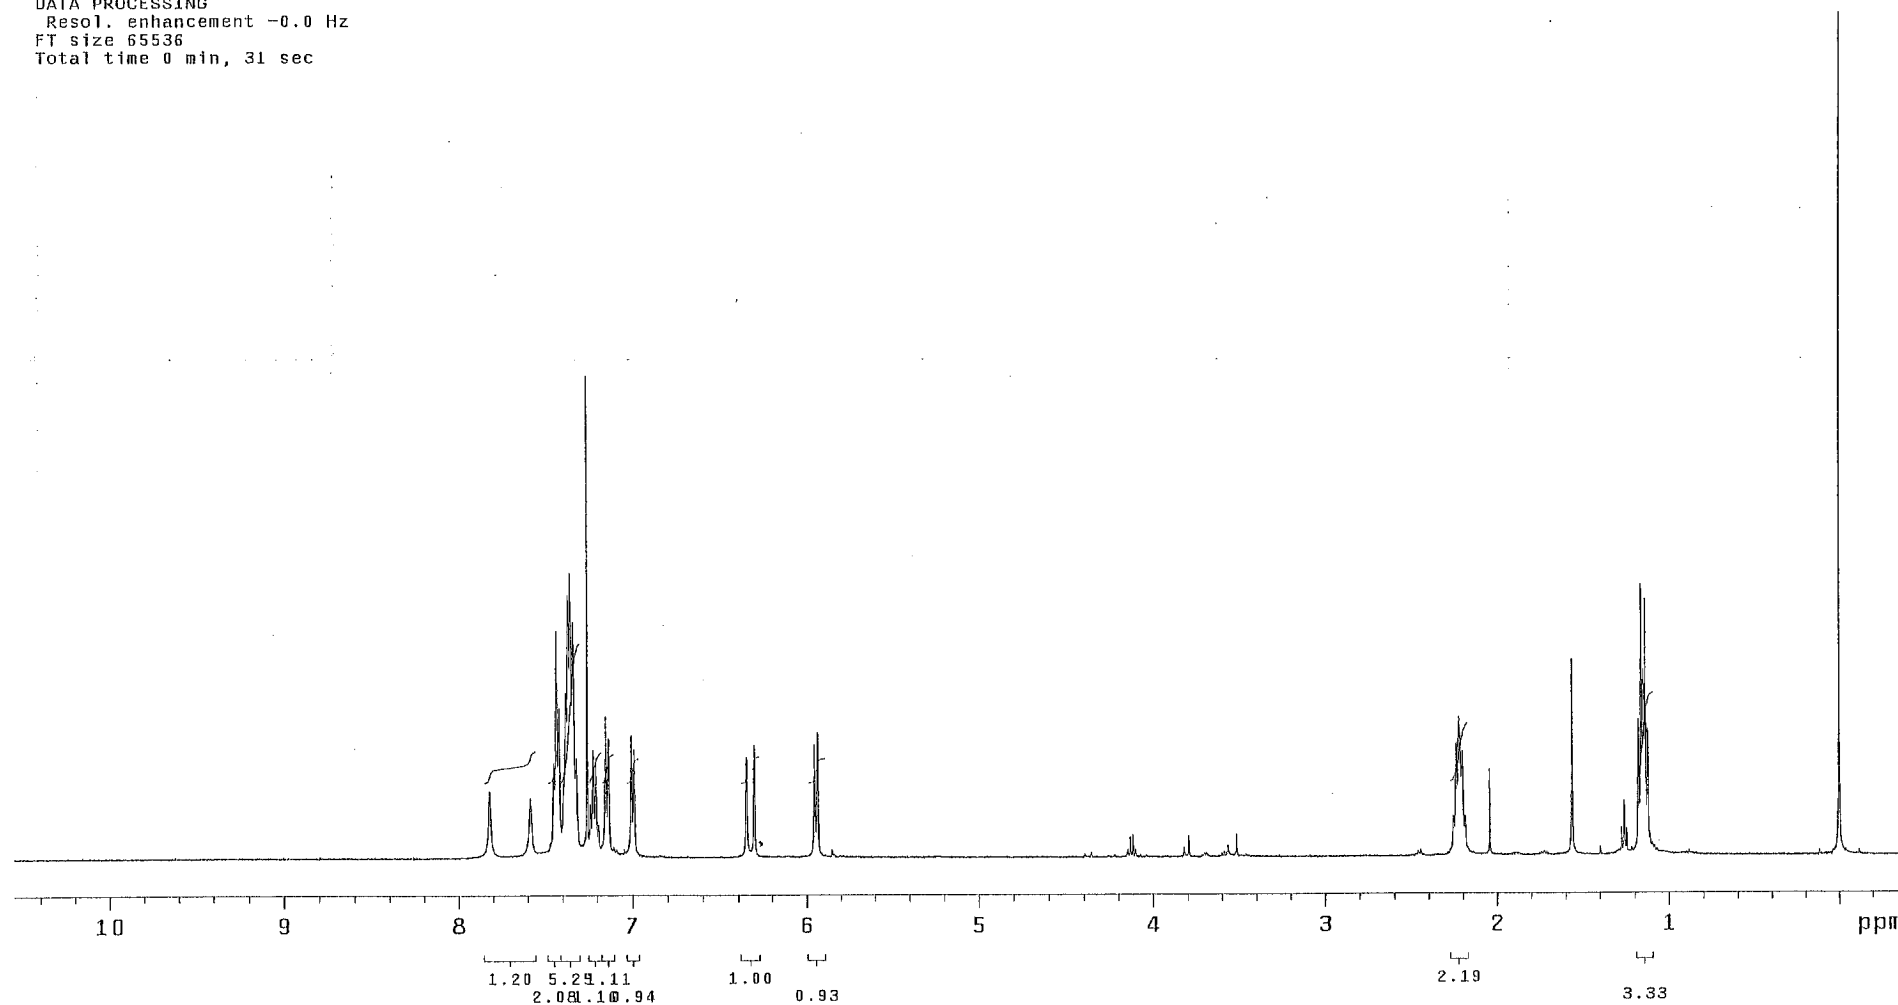

# Phenyl 5-ethyl-3-oxo-2-phenyl-3,4-dihydropyrazine-1(2H)-carboxylate (15b)

Sample: DBR-4-615  
Sample ID: s\_20120724\_1  
File: /home/walkup/vnmr

Pulse Sequence: s2pul1

Solvent: cdcl3  
Temp. 26.0 C / 299.1 K  
Operator: walkup  
File: cdcl3\_01  
VNMR5-500 "NMR500"

Relax. delay 1.000 sec  
Pulse 45.0 degrees  
Acq. time 1.300 sec  
Width 30487.8 Hz  
256 repetitions  
OBSERVE C13, 125.6576352 MHz  
DECOUPLE H1, 499.7341220 MHz  
Power 42 dB  
continuously on  
WALTZ-16 modulated  
DATA PROCESSING  
Line broadening 0.5 Hz  
FT size 131072  
Total time 9 min, 51 sec

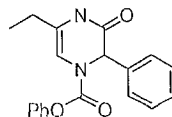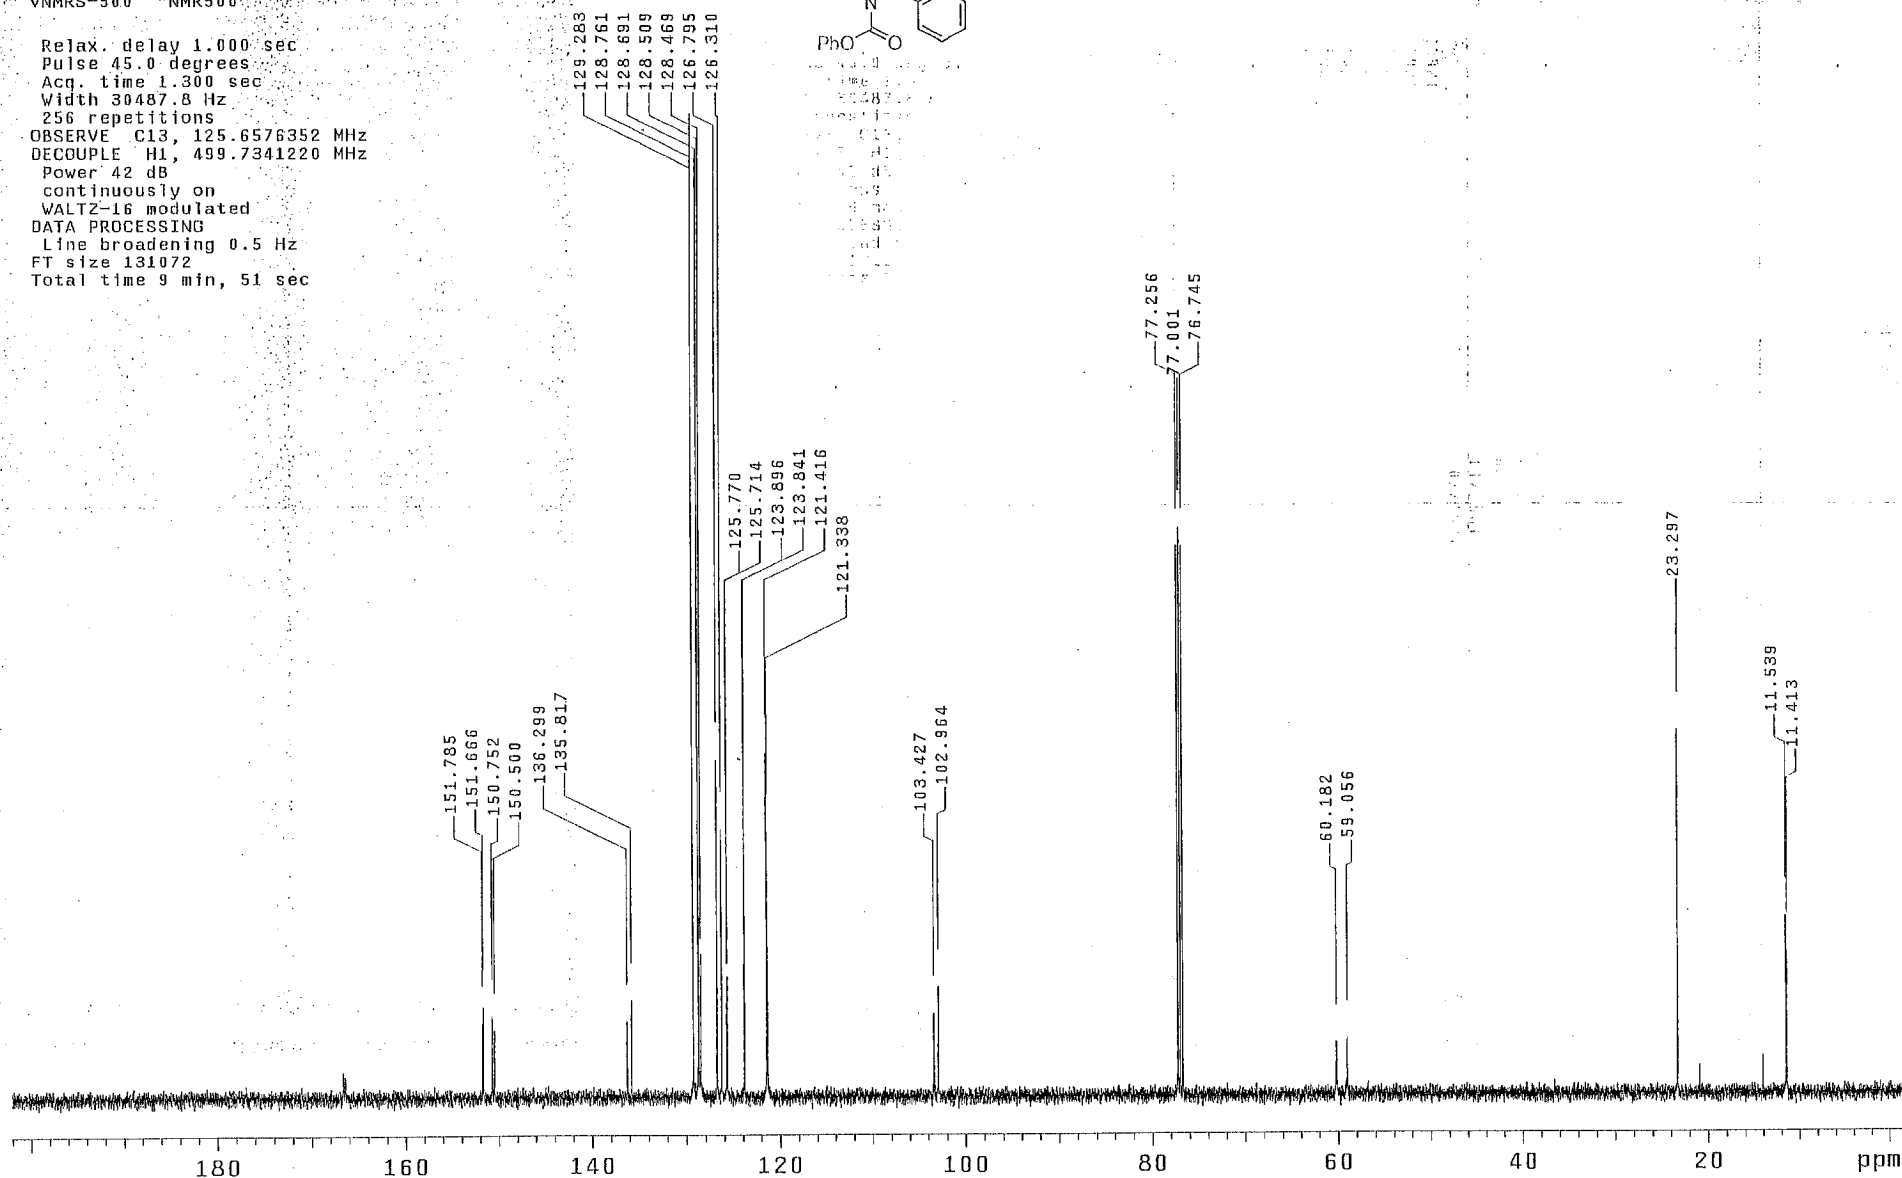

# Phenyl 5-benzyl-3-oxo-2-phenyl-3,4-dihydropyrazine-1(2H)-carboxylate (15c)

Sample: DBR-4-635  
Sample ID: s\_20120905\_02  
File: s\_20120905\_02\data\cdcl3

Pulse Sequence: s2pu1

Solvent: cdcl3  
Temp. 26.0 C / 299.1 K  
Operator: walkup  
File: cdcl3\_01  
VNMR5-500 "NMR500"

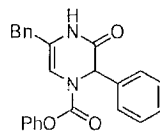

Relax. delay 1.000 sec  
Pulse 45.0 degrees  
Acq. time 2.049 sec  
Width 8012.8 Hz  
8 repetitions  
OBSERVE H1, 499.7316473 MHz  
DATA PROCESSING  
Resol. enhancement -0.0 Hz  
FT size 65536  
Total time 0 min, 31 sec

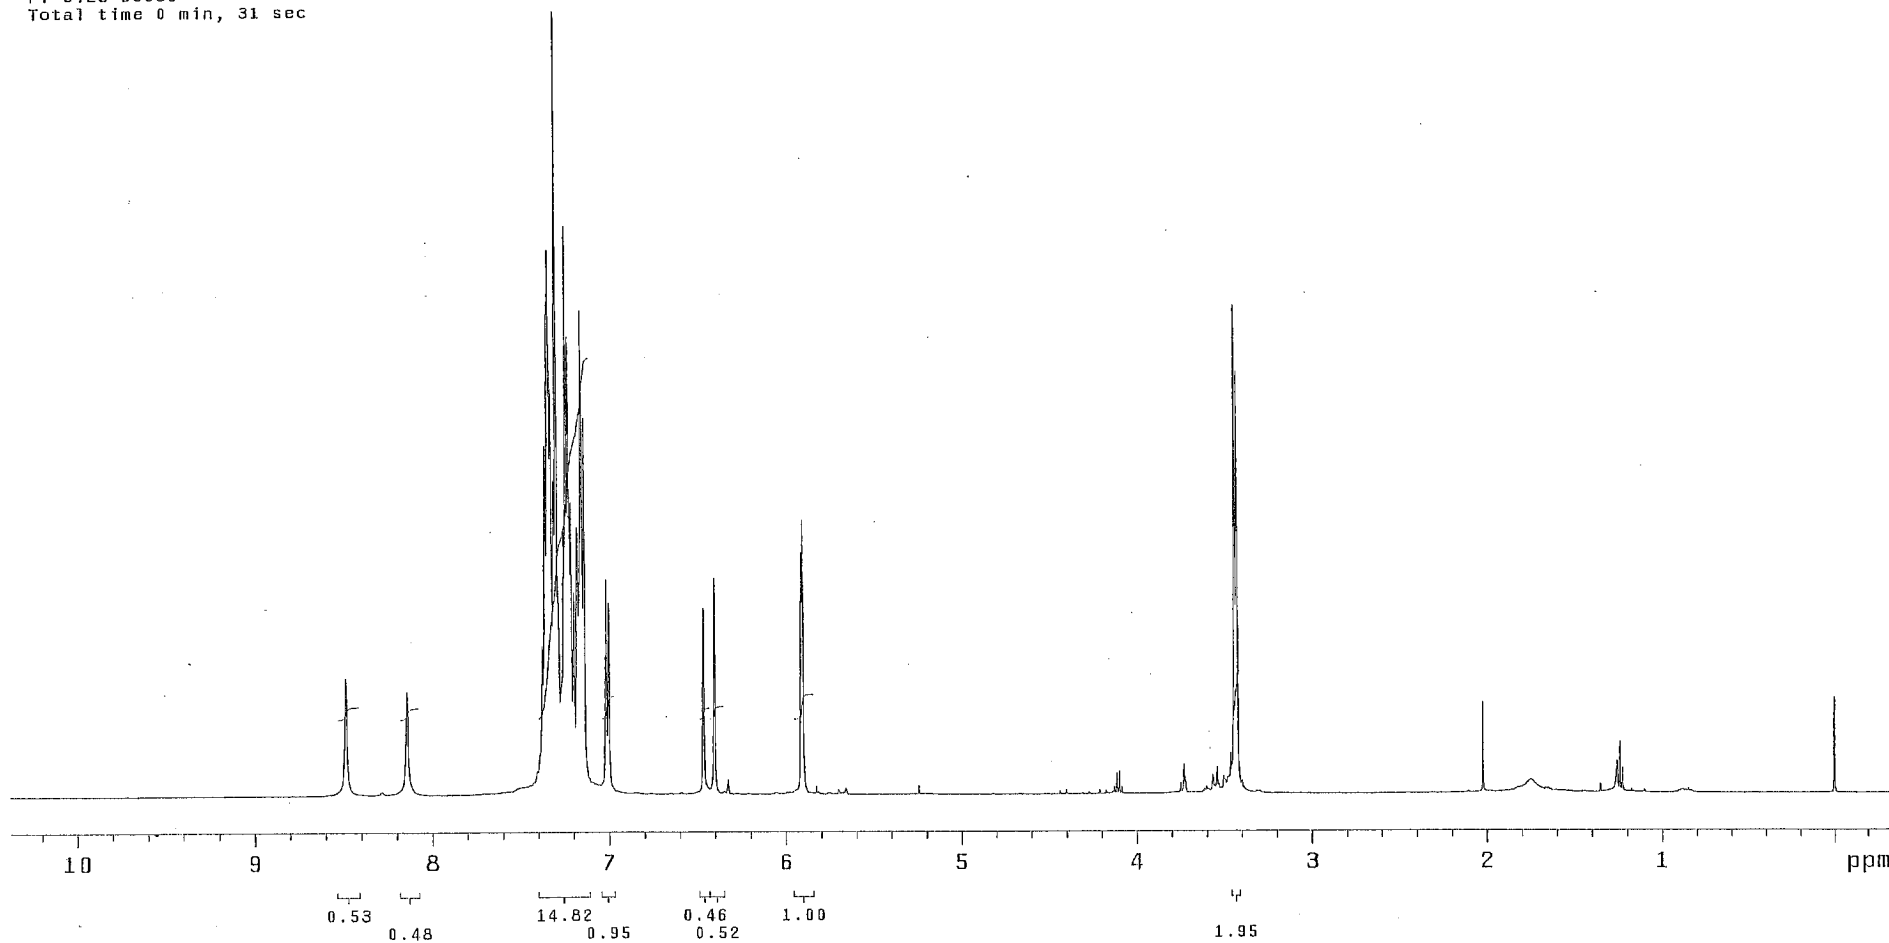



# Phenyl 5-benzyl-3-oxo-2-phenyl-3,4-dihydropyrazine-1(2H)-carboxylate (15c)

Sample: DBR-4-635  
Sample ID: s\_20120905\_03  
File: s\_20120905\_03/data/cdcl3\_01.

Pulse Sequence: s2pu1

Solvent: cdcl3  
Temp. 26.0 C / 299.1 K  
Operator: walkup  
File: cdcl3\_01  
VNMRS-500 "NMR500"

Relax. delay 1.000 sec  
Pulse 45.0 degrees  
Acq. time 1.300 sec  
Width 30487.8 Hz  
256 repetitions  
OBSERVE C13, 125.6576314 MHz  
DECOUPLE H1, 499.7341220 MHz  
Power 42 dB  
continuously on  
WALTZ-16 modulated  
DATA PROCESSING  
Line broadening 0.5 Hz  
FT size 131072  
Total time 9 min, 51 sec

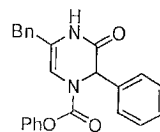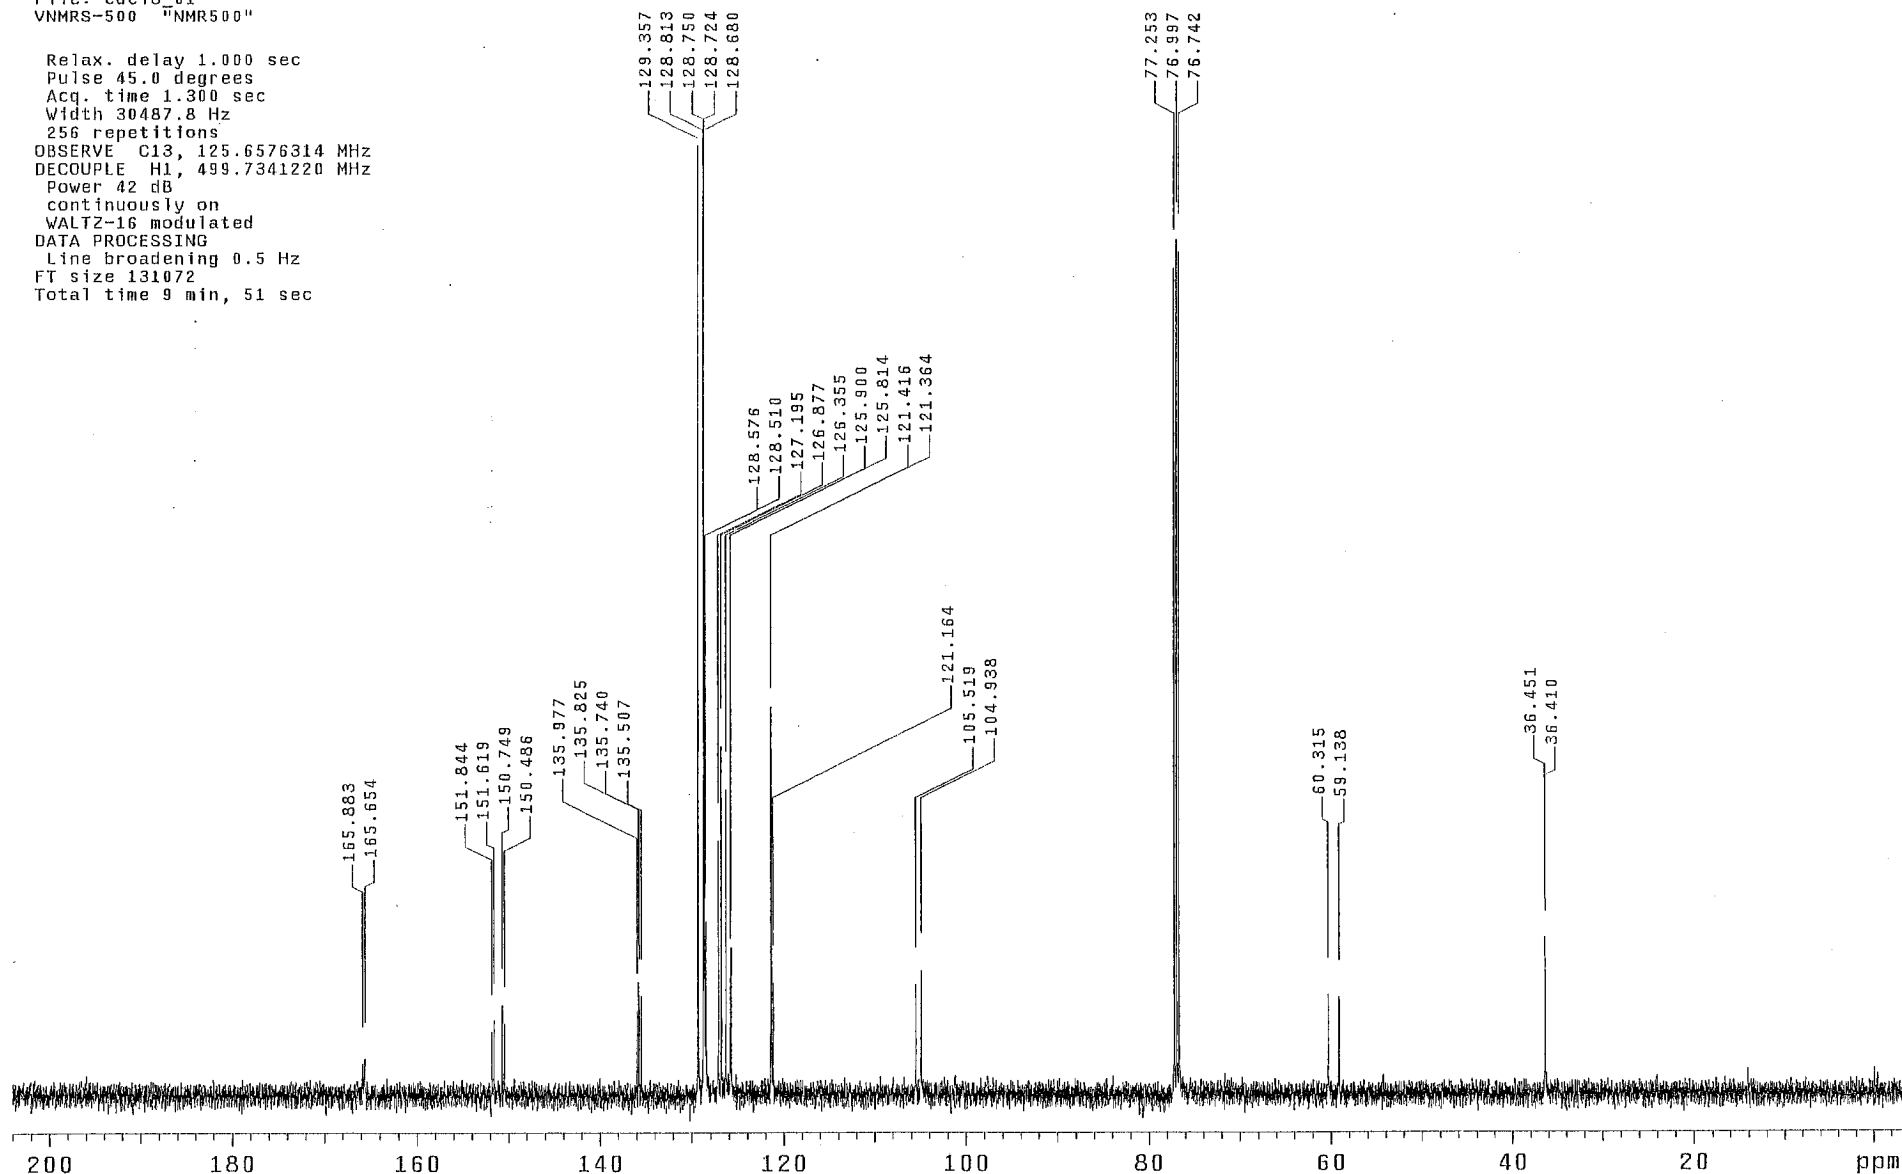

Sample: DBR-4-599R  
Sample ID: s\_20140703\_01  
File: s\_20140703\_01/data/cdcl3\_01.fid

Pulse Sequence: s2pu1

Solvent: cdcl3  
Temp. 26.0 C / 299.1 K  
Operator: walkup  
File: cdcl3\_01  
VNMR5-500 "NMR500"

Relax. delay 1.000 sec  
Pulse 45.0 degrees  
Acq. time 2.049 sec  
Width 8012.8 Hz  
8 repetitions  
OBSERVE H1, 499.7316290 MHz  
DATA PROCESSING  
Resol. enhancement -0.0 Hz  
FT size 65536  
Total time 0 min, 31 sec

# Phenyl 3-oxo-2,5-diphenyl-3,4-dihydropyrazine-1(2H)-carboxylate (15d)

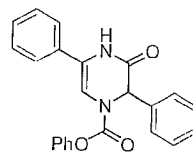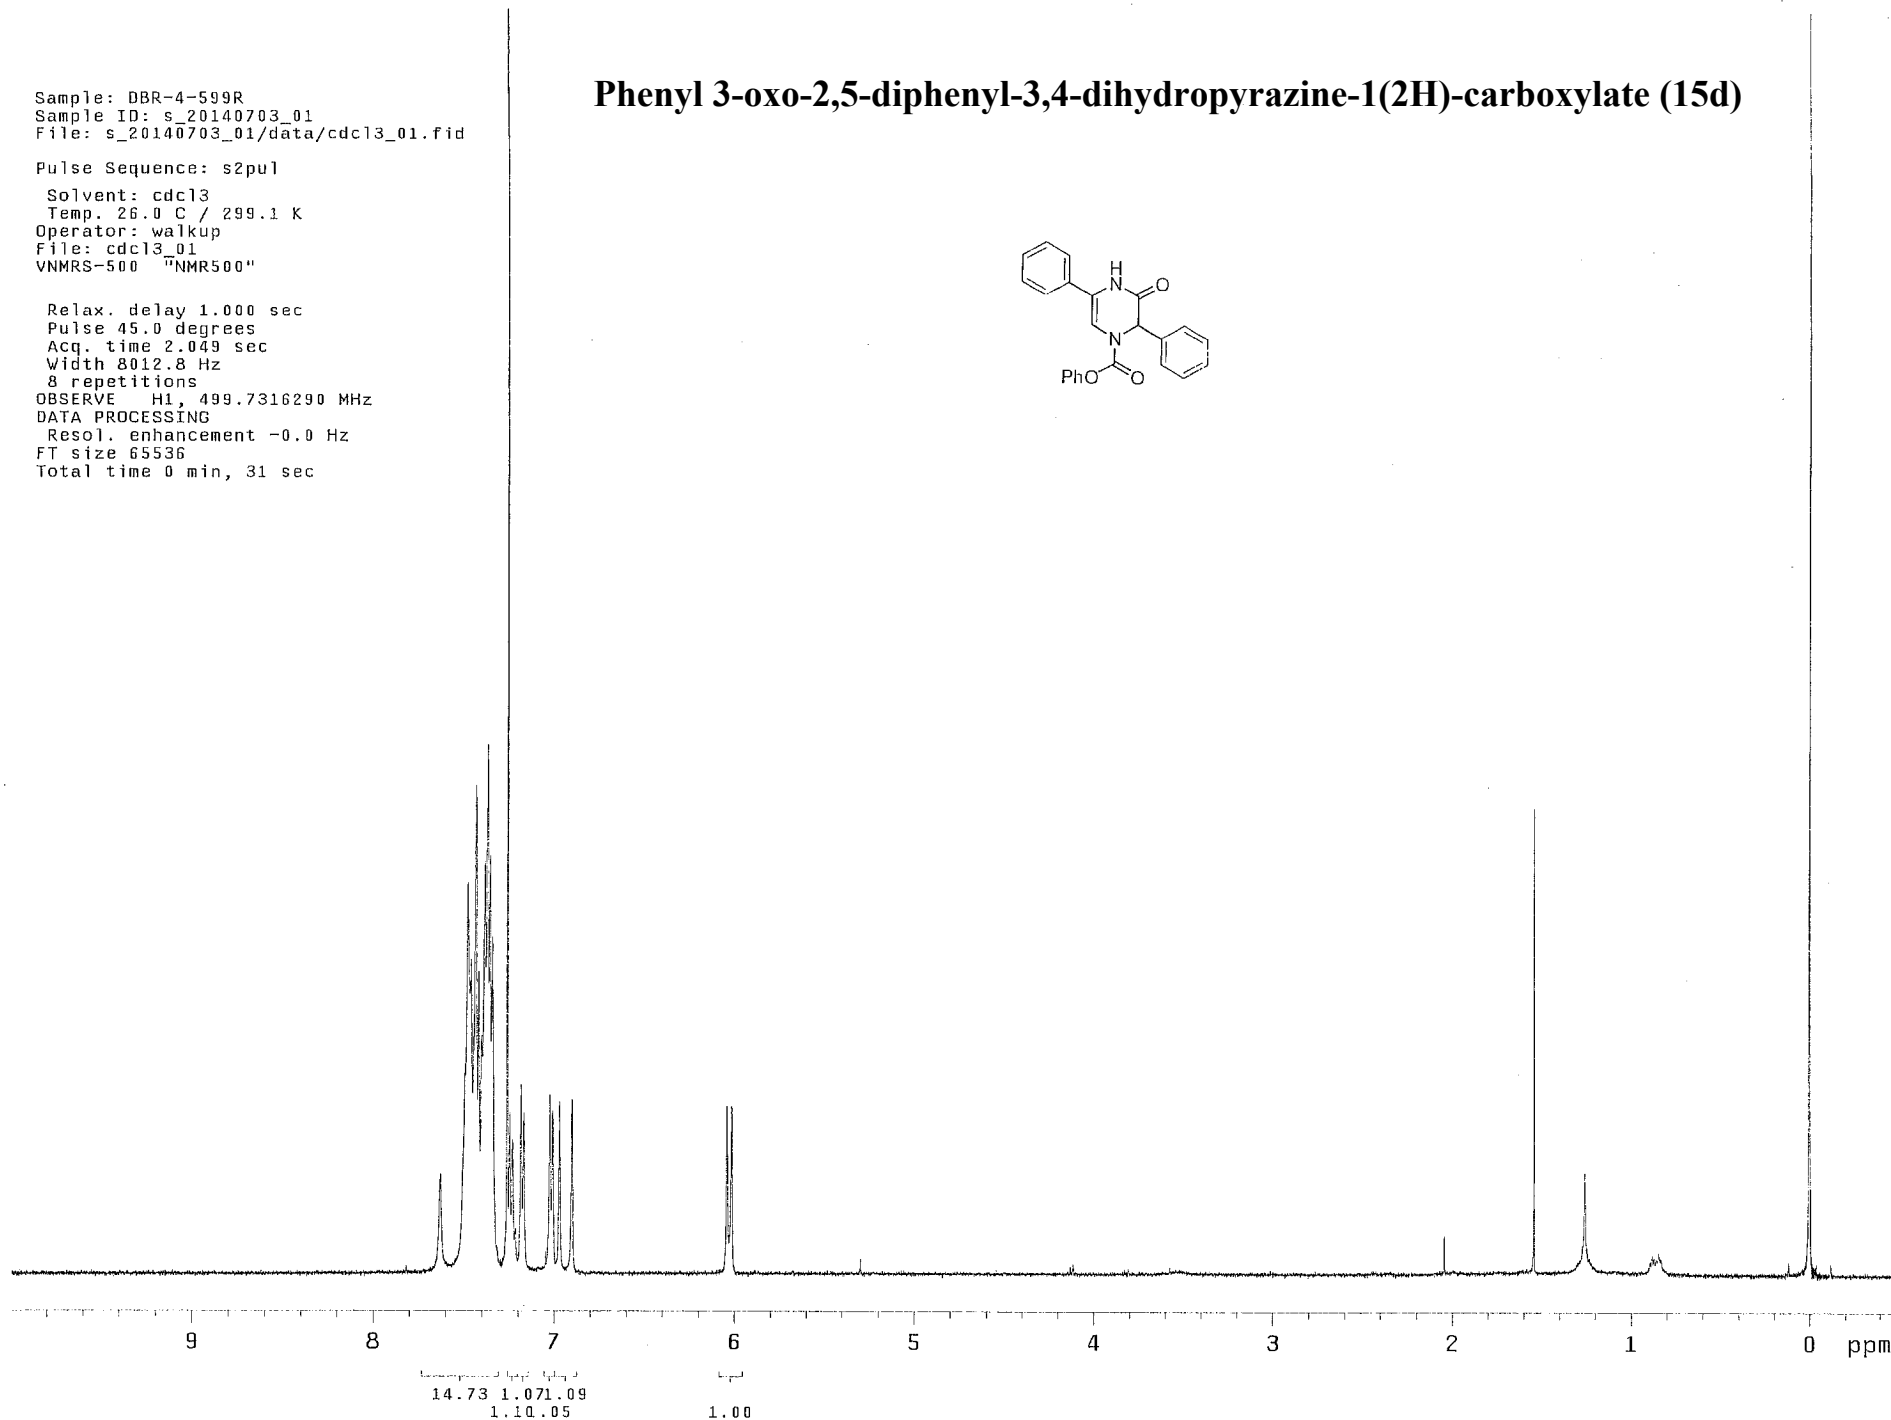

# Phenyl 3-oxo-2,5-diphenyl-3,4-dihydropyrazine-1(2H)-carboxylate (15d)

Sample: DBR-4-599R  
File: exp

Pulse Sequence: s2pu1  
Solvent: cdcl3  
Temp. 26.0 C / 299.1  
Operator: walkup  
VNMR5-500 "NMR500"

Relax. delay 1.000 sec  
Pulse 45.0 degrees  
Acq. time 1.300 sec  
Width 30487.8 Hz  
25152 repetitions  
OBSERVE C13, 125.6576166 MHz  
DECOUPLE H1, 499.7341220 MHz  
Power 42 dB  
continuously on  
WALTZ-16 modulated  
DATA PROCESSING  
Line broadening 0.5 Hz  
FT size 131072  
Total time 16 hr, 25 min, 21 sec

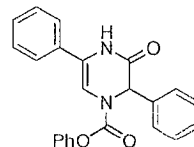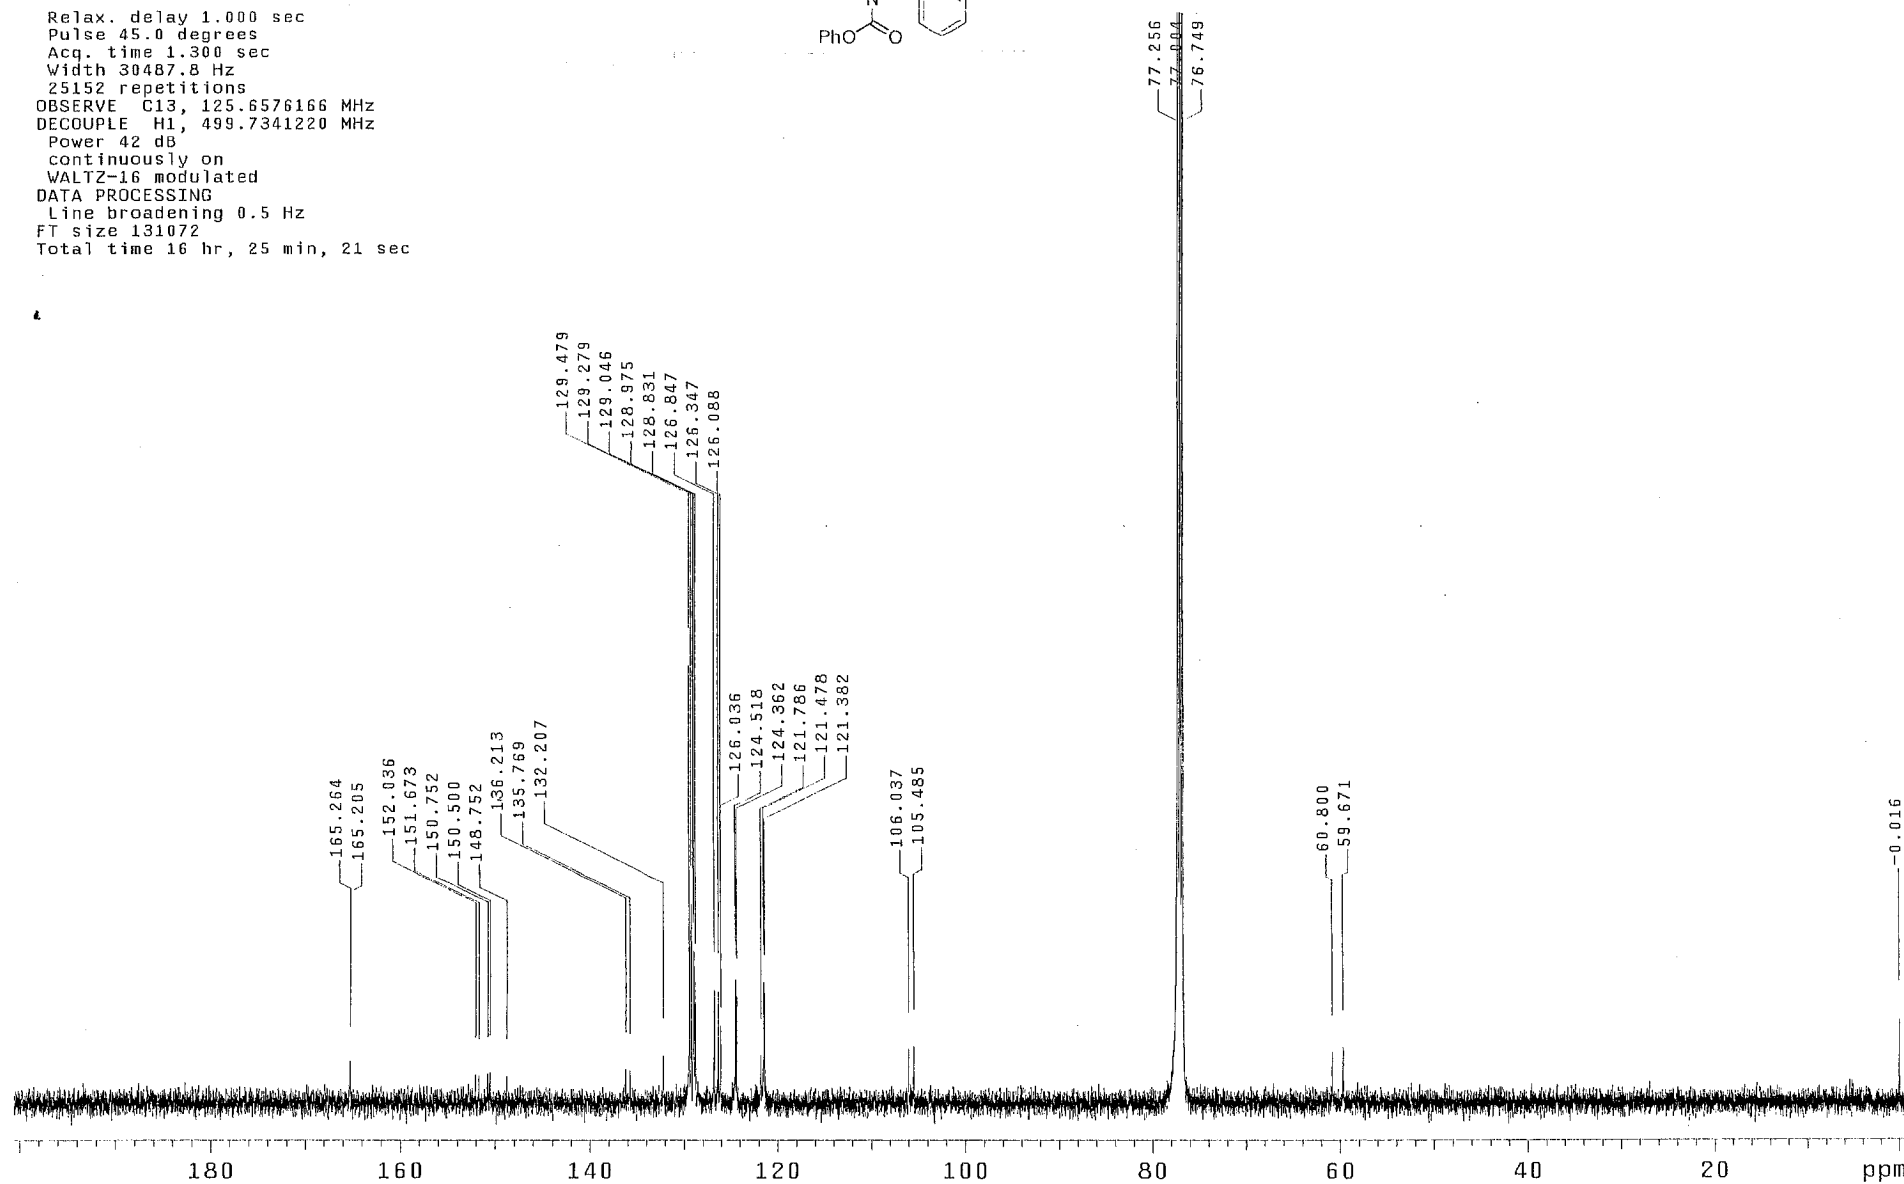

# Methyl 2-((2-oxoethyl)(phenoxycarbonyl)amino)-2-phenylacetate (16)

DBR-5-856

Sample Name **DBR-5-856**  
Date collected **2017-09-01**

Pulse sequence **PROTON**  
Solvent **cdcl3**

Temperature **25**  
Spectrometer **NMR500-vnmrs500**

Study owner **walkup**  
Operator **walkup**

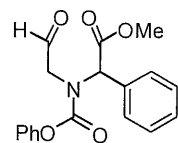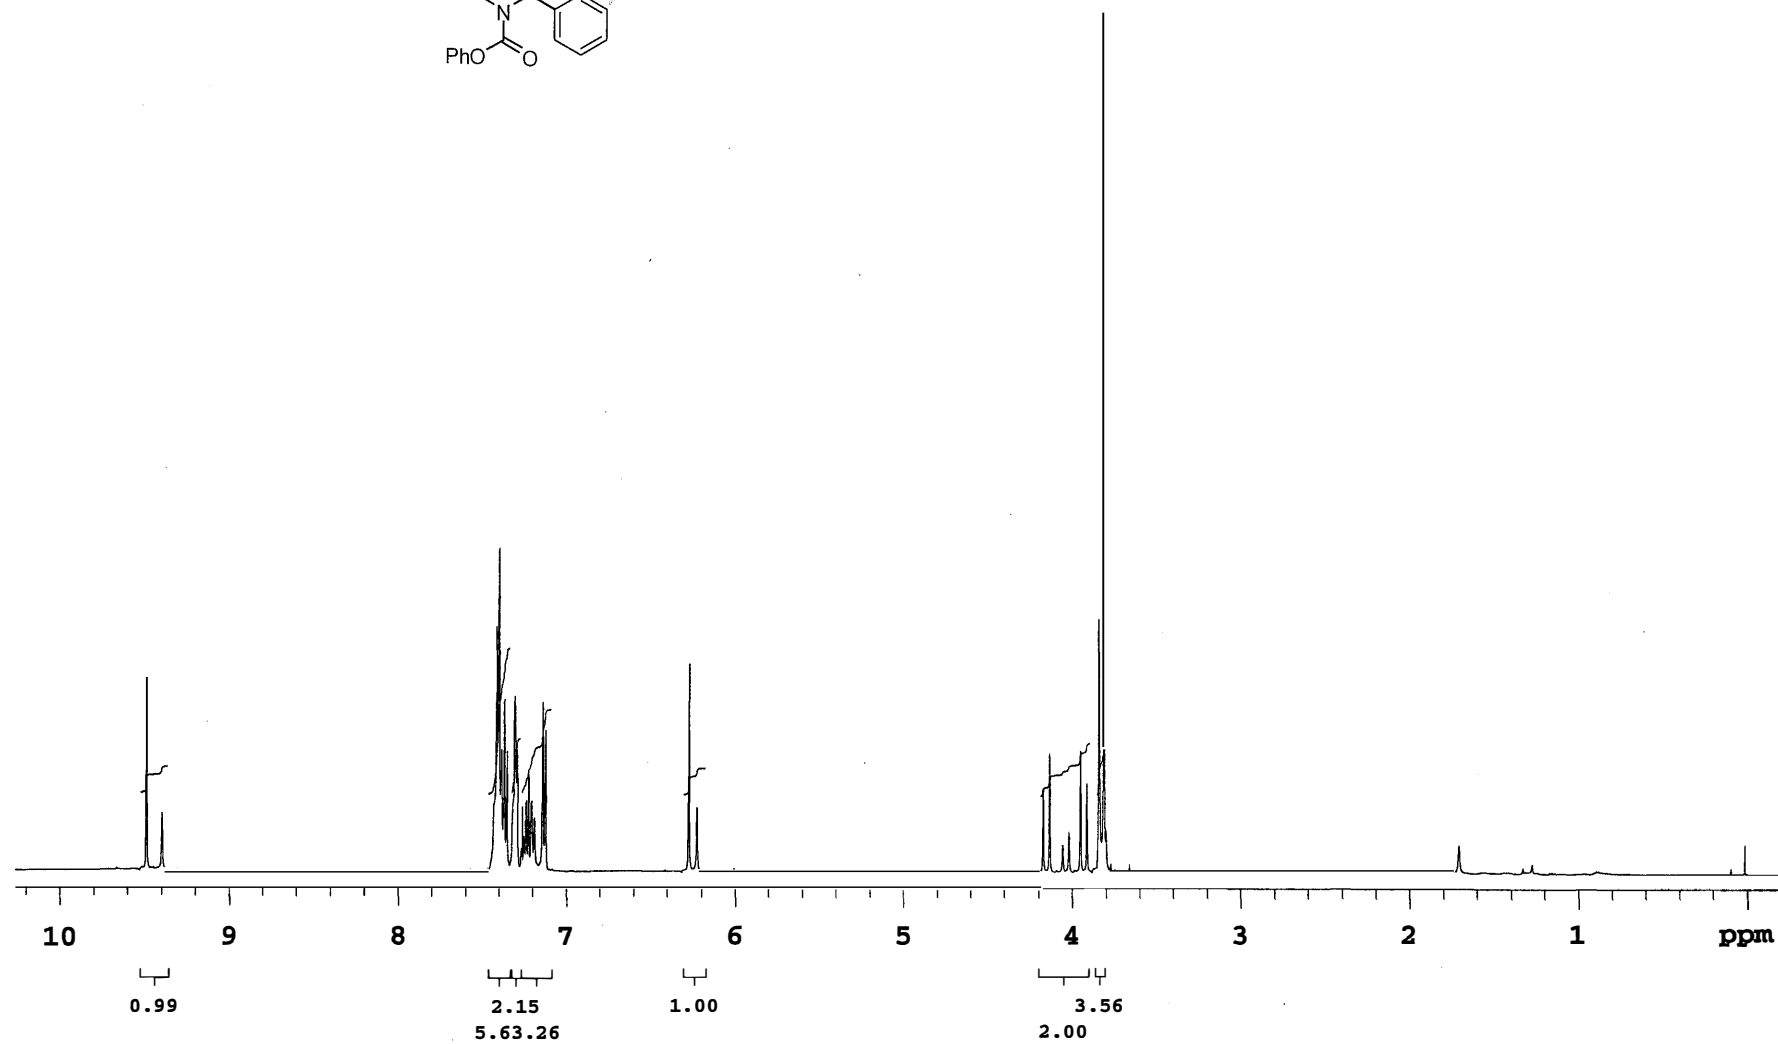

# Methyl 2-((2-oxoethyl)(phenoxyacetyl)amino)-2-phenylacetate (16)

DBR-5-856

Sample Name DBR-5-856  
Date collected 2017-09-01

Pulse sequence CARBON  
Solvent cdcl3

Temperature 25  
Spectrometer NMR500-vnmrs500

Study owner walkup  
Operator walkup

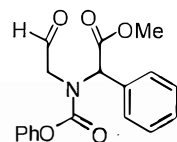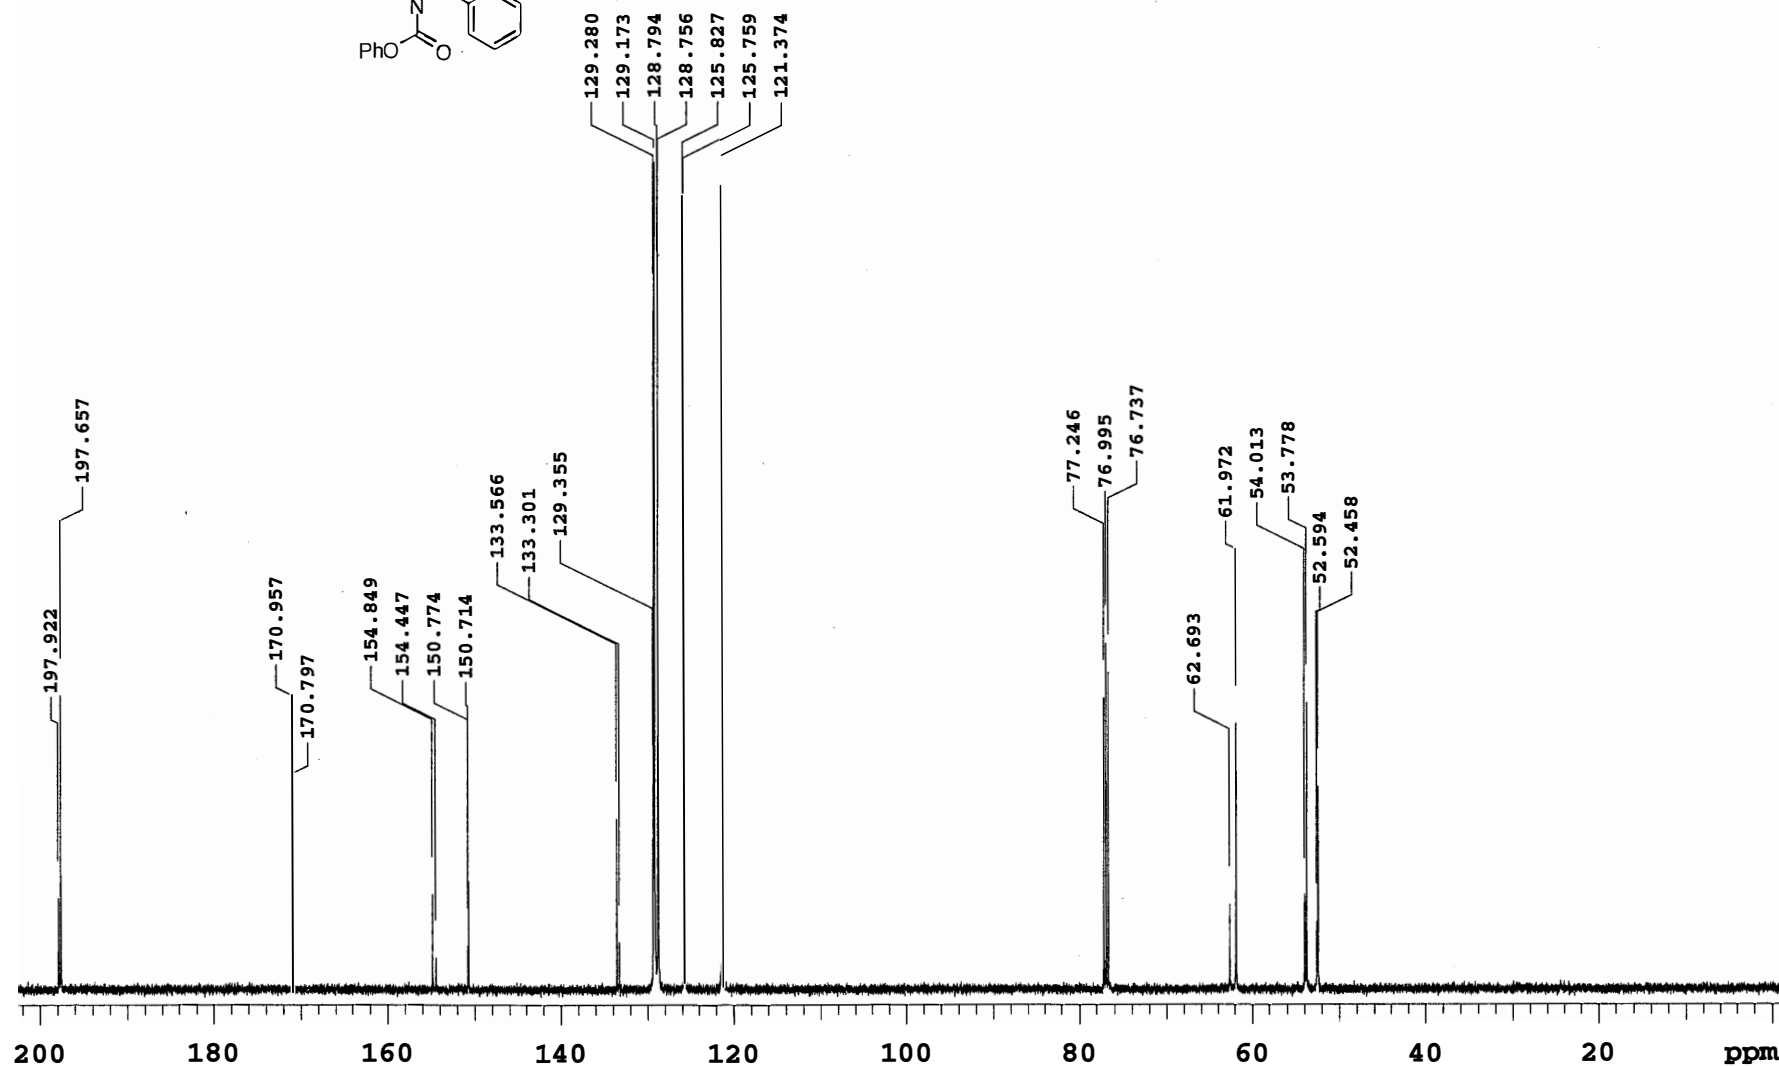

Supplement: Additional file 1 [file 1860-5397-15-8-S1.pdf]
